# Supplementary material for: Dissection of Quantitative Blackleg Resistance Reveals Novel Variants of Resistance Gene Rlm9 in Elite Brassica napus
Source: Front Plant Sci. 2021 Nov 18;12:749491. doi: 10.3389/fpls.2021.749491 (PMC8636856; doi:10.3389/fpls.2021.749491)
Supplement: Supplementary file 1 [file Data_Sheet_1.xlsx]

## Sheet: S1
Supplementary Table S1 BLAST results of SNP markers derived from Brassica 60k Illumina Infinium™ SNP array uniquely anchored to Darmor-bzh v10
query seq-id	chromosome	hits in genome	percentage of identical matches	alignment length	mismatches	no of gap openings	qstart	qend	sstart	send	evalue	bitscore
Bn-A01-p80385	A01	1	100	50	0	0	1	50	76923	76874	1.7e-18	93.5
Bn-A01-p97751	A01	1	100	50	0	0	1	50	98526	98477	1.7e-18	93.5
Bn-A01-p100441	A01	1	100	50	0	0	1	50	100142	100093	1.7e-18	93.5
Bn-A01-p100693	A01	1	100	50	0	0	1	50	100293	100342	1.7e-18	93.5
Bn-A01-p101094	A01	1	100	50	0	0	1	50	100697	100746	1.7e-18	93.5
Bn-A01-p101021	A01	1	100	50	0	0	1	50	100724	100675	1.7e-18	93.5
Bn-A01-p101451	A01	1	100	50	0	0	1	50	101054	101103	1.7e-18	93.5
Bn-A01-p101879	A01	1	100	50	0	0	1	50	101484	101533	1.7e-18	93.5
Bn-A01-p101943	A01	1	100	50	0	0	1	50	101648	101599	1.7e-18	93.5
Bn-A01-p102187	A01	1	100	50	0	0	1	50	101900	101851	1.7e-18	93.5
Bn-A01-p102249	A01	1	96.154	52	0	1	1	50	101964	101913	1.03e-15	84.2
Bn-A01-p108225	A01	1	100	50	0	0	1	50	116405	116356	1.7e-18	93.5
Bn-A01-p137869	A01	1	100	50	0	0	1	50	145372	145421	1.7e-18	93.5
Bn-A01-p137814	A01	1	100	50	0	0	1	50	145417	145368	1.7e-18	93.5
Bn-A01-p145676	A01	1	100	50	0	0	1	50	154236	154285	1.7e-18	93.5
Bn-A01-p146963	A01	1	98.039	51	0	1	1	50	155515	155565	7.93e-17	87.9
Bn-A01-p147360	A01	1	100	50	0	0	1	50	156012	155963	1.7e-18	93.5
Bn-A01-p147990	A01	1	100	50	0	0	1	50	156544	156593	1.7e-18	93.5
Bn-A01-p150028	A01	1	100	50	0	0	1	50	162583	162534	1.7e-18	93.5
Bn-A01-p161237	A01	1	100	50	0	0	1	50	171393	171442	1.7e-18	93.5
Bn-A01-p176052	A01	1	100	50	0	0	1	50	186784	186833	1.7e-18	93.5
Bn-A01-p178709	A01	1	100	50	0	0	1	50	189438	189487	1.7e-18	93.5
Bn-A01-p206610	A01	1	100	50	0	0	1	50	217474	217425	1.7e-18	93.5
Bn-A01-p207098	A01	1	100	50	0	0	1	50	217962	217913	1.7e-18	93.5
Bn-A01-p207363	A01	1	100	50	0	0	1	50	218127	218176	1.7e-18	93.5
Bn-A01-p220693	A01	1	100	50	0	0	1	50	231436	231485	1.7e-18	93.5
Bn-A01-p234898	A01	1	100	50	0	0	1	50	244452	244403	1.7e-18	93.5
Bn-A01-p235115	A01	1	100	50	0	0	1	50	244673	244624	1.7e-18	93.5
Bn-A01-p235484	A01	1	100	50	0	0	1	50	245017	244968	1.7e-18	93.5
Bn-A01-p276866	A01	1	100	50	0	0	1	50	279503	279552	1.7e-18	93.5
Bn-A01-p289703	A01	1	100	50	0	0	1	50	292437	292388	1.7e-18	93.5
Bn-A01-p309524	A01	1	100	50	0	0	1	50	310563	310514	1.7e-18	93.5
Bn-A01-p314983	A01	1	100	50	0	0	1	50	314886	314837	1.7e-18	93.5
Bn-A01-p333856	A01	1	100	50	0	0	1	50	340971	341020	1.7e-18	93.5
Bn-A01-p345182	A01	1	100	50	0	0	1	50	353195	353244	1.7e-18	93.5
Bn-A01-p436141	A01	1	100	50	0	0	1	50	439005	438956	1.7e-18	93.5
Bn-A01-p460072	A01	1	100	50	0	0	1	50	458927	458878	1.7e-18	93.5
Bn-A01-p483495	A01	1	100	50	0	0	1	50	482281	482232	1.7e-18	93.5
Bn-A01-p511682	A01	1	100	50	0	0	1	50	503333	503284	1.7e-18	93.5
Bn-A01-p595651	A01	1	100	50	0	0	1	50	594813	594764	1.7e-18	93.5
Bn-A01-p599910	A01	1	100	50	0	0	1	50	603403	603452	1.7e-18	93.5
Bn-A01-p609857	A01	1	100	50	0	0	1	50	613311	613360	1.7e-18	93.5
Bn-A01-p622550	A01	1	100	50	0	0	1	50	627338	627289	1.7e-18	93.5
Bn-A01-p623568	A01	1	100	50	0	0	1	50	628254	628303	1.7e-18	93.5
Bn-A01-p634701	A01	1	100	50	0	0	1	50	640029	639980	1.7e-18	93.5
Bn-A01-p644410	A01	1	98.039	51	0	1	1	50	649776	649726	7.93e-17	87.9
Bn-A01-p645951	A01	1	100	50	0	0	1	50	651316	651267	1.7e-18	93.5
Bn-A01-p648196	A01	1	100	50	0	0	1	50	653446	653495	1.7e-18	93.5
Bn-A01-p649805	A01	1	98	50	1	0	1	50	655118	655069	7.93e-17	87.9
Bn-A01-p657852	A01	1	100	50	0	0	1	50	658855	658806	1.7e-18	93.5
Bn-A01-p663088	A01	1	100	49	0	0	2	50	664862	664910	6.13e-18	91.6
Bn-A01-p710239	A01	1	100	50	0	0	1	50	723919	723968	1.7e-18	93.5
Bn-Scaffold010693-p54	A01	1	100	50	0	0	1	50	735524	735475	1.7e-18	93.5
Bn-A01-p713562	A01	1	100	50	0	0	1	50	741072	741023	1.7e-18	93.5
Bn-A01-p737560	A01	1	100	50	0	0	1	50	770375	770424	1.7e-18	93.5
Bn-A01-p739098	A01	1	100	50	0	0	1	50	772016	771967	1.7e-18	93.5
Bn-A01-p751573	A01	1	100	50	0	0	1	50	782185	782136	1.7e-18	93.5
Bn-A01-p777123	A01	1	100	50	0	0	1	50	811269	811220	1.7e-18	93.5
Bn-A01-p778048	A01	1	100	50	0	0	1	50	812085	812134	1.7e-18	93.5
Bn-A01-p796004	A01	1	100	50	0	0	1	50	831174	831125	1.7e-18	93.5
Bn-scaff_20461_1-p169329	A01	1	100	50	0	0	1	50	843580	843629	1.7e-18	93.5
Bn-A01-p820317	A01	1	100	50	0	0	1	50	862984	862935	1.7e-18	93.5
Bn-A01-p821328	A01	1	100	50	0	0	1	50	863895	863944	1.7e-18	93.5
Bn-A01-p830221	A01	1	100	50	0	0	1	50	872755	872804	1.7e-18	93.5
Bn-A01-p849125	A01	1	98.039	51	0	1	1	50	892861	892811	7.93e-17	87.9
Bn-A01-p866260	A01	1	100	50	0	0	1	50	911273	911322	1.7e-18	93.5
Bn-A01-p879755	A01	1	100	50	0	0	1	50	921899	921850	1.7e-18	93.5
Bn-A01-p887815	A01	1	100	49	0	0	1	49	929125	929173	6.13e-18	91.6
Bn-A01-p912298	A01	1	100	50	0	0	1	50	947320	947369	1.7e-18	93.5
Bn-A01-p916774	A01	1	100	50	0	0	1	50	950827	950876	1.7e-18	93.5
Bn-A01-p923356	A01	1	100	50	0	0	1	50	957722	957771	1.7e-18	93.5
Bn-A01-p939202	A01	1	100	50	0	0	1	50	971828	971779	1.7e-18	93.5
Bn-A01-p968465	A01	1	100	50	0	0	1	50	1004391	1004440	1.7e-18	93.5
Bn-A01-p968378	A01	1	100	50	0	0	1	50	1004404	1004355	1.7e-18	93.5
Bn-A01-p970103	A01	1	100	50	0	0	1	50	1006294	1006343	1.7e-18	93.5
Bn-A01-p978860	A01	1	100	50	0	0	1	50	1013870	1013821	1.7e-18	93.5
Bn-A01-p994722	A01	1	100	50	0	0	1	50	1029687	1029736	1.7e-18	93.5
Bn-A01-p1000115	A01	1	100	50	0	0	1	50	1035075	1035026	1.7e-18	93.5
Bn-A01-p1001022	A01	1	100	50	0	0	1	50	1035881	1035930	1.7e-18	93.5
Bn-A01-p1012990	A01	1	100	50	0	0	1	50	1049193	1049242	1.7e-18	93.5
Bn-A01-p1026631	A01	1	100	50	0	0	1	50	1063116	1063165	1.7e-18	93.5
Bn-A01-p1029558	A01	1	100	50	0	0	1	50	1066032	1066081	1.7e-18	93.5
Bn-A01-p1029668	A01	1	100	50	0	0	1	50	1066142	1066191	1.7e-18	93.5
Bn-A01-p1041947	A01	1	100	50	0	0	1	50	1079586	1079537	1.7e-18	93.5
Bn-A01-p1045881	A01	1	100	50	0	0	1	50	1083666	1083715	1.7e-18	93.5
Bn-A01-p1056386	A01	1	100	48	0	0	3	50	1095903	1095950	2.2e-17	89.8
Bn-A01-p1067371	A01	1	100	50	0	0	1	50	1108064	1108113	1.7e-18	93.5
Bn-Scaffold014880-p22	A01	1	100	50	0	0	1	50	1122020	1122069	1.7e-18	93.5
Bn-A09-p5966342	A01	1	100	50	0	0	1	50	1122733	1122684	1.7e-18	93.5
Bn-A01-p1089109	A01	1	100	50	0	0	1	50	1135053	1135004	1.7e-18	93.5
Bn-A01-p1095733	A01	1	100	50	0	0	1	50	1142058	1142009	1.7e-18	93.5
Bn-A01-p1104187	A01	1	100	50	0	0	1	50	1147111	1147062	1.7e-18	93.5
Bn-A01-p1119894	A01	1	100	50	0	0	1	50	1163778	1163729	1.7e-18	93.5
Bn-A01-p1125565	A01	1	100	50	0	0	1	50	1169387	1169338	1.7e-18	93.5
Bn-A01-p1126874	A01	1	100	50	0	0	1	50	1170448	1170399	1.7e-18	93.5
Bn-A01-p1132885	A01	1	100	50	0	0	1	50	1176340	1176389	1.7e-18	93.5
Bn-A01-p1133447	A01	1	100	50	0	0	1	50	1176902	1176951	1.7e-18	93.5
Bn-A01-p1145674	A01	1	100	50	0	0	1	50	1198905	1198856	1.7e-18	93.5
Bn-A01-p1148760	A01	1	100	50	0	0	1	50	1202146	1202195	1.7e-18	93.5
Bn-A01-p1149351	A01	1	100	50	0	0	1	50	1202837	1202788	1.7e-18	93.5
Bn-A01-p1149698	A01	1	100	50	0	0	1	50	1203084	1203133	1.7e-18	93.5
Bn-A01-p1150857	A01	1	100	50	0	0	1	50	1204343	1204294	1.7e-18	93.5
Bn-A01-p1151961	A01	1	100	50	0	0	1	50	1205350	1205399	1.7e-18	93.5
Bn-A01-p1152123	A01	1	100	50	0	0	1	50	1205512	1205561	1.7e-18	93.5
Bn-A01-p1152359	A01	1	100	50	0	0	1	50	1205750	1205799	1.7e-18	93.5
Bn-A01-p1156979	A01	1	100	50	0	0	1	50	1210462	1210413	1.7e-18	93.5
Bn-A01-p1158564	A01	1	97.917	48	0	1	4	50	1211984	1212031	3.69e-15	82.4
Bn-A01-p1187868	A01	1	100	50	0	0	1	50	1236351	1236400	1.7e-18	93.5
Bn-A01-p1188004	A01	1	100	50	0	0	1	50	1236587	1236538	1.7e-18	93.5
Bn-A01-p1188928	A01	1	100	50	0	0	1	50	1237131	1237180	1.7e-18	93.5
Bn-A01-p1190844	A01	1	100	50	0	0	1	50	1239116	1239067	1.7e-18	93.5
Bn-A01-p1227000	A01	1	100	50	0	0	1	50	1275274	1275323	1.7e-18	93.5
Bn-A01-p1227023	A01	1	100	50	0	0	1	50	1275399	1275350	1.7e-18	93.5
Bn-A01-p1232064	A01	1	100	50	0	0	1	50	1280699	1280748	1.7e-18	93.5
Bn-A01-p1235334	A01	1	100	50	0	0	1	50	1284013	1284062	1.7e-18	93.5
Bn-A01-p1236927	A01	1	100	50	0	0	1	50	1290476	1290427	1.7e-18	93.5
Bn-A01-p1247899	A01	1	100	50	0	0	1	50	1299402	1299451	1.7e-18	93.5
Bn-A01-p1249847	A01	1	100	50	0	0	1	50	1301459	1301410	1.7e-18	93.5
Bn-A01-p1250595	A01	1	100	50	0	0	1	50	1302247	1302198	1.7e-18	93.5
Bn-A01-p1261017	A01	1	98	50	1	0	1	50	1312539	1312490	7.93e-17	87.9
Bn-A01-p1275284	A01	1	100	50	0	0	1	50	1325308	1325357	1.7e-18	93.5
Bn-A01-p1276486	A01	1	100	50	0	0	1	50	1326521	1326570	1.7e-18	93.5
Bn-A01-p1276504	A01	1	100	50	0	0	1	50	1326640	1326591	1.7e-18	93.5
Bn-A01-p1314194	A01	1	100	50	0	0	1	50	1368260	1368211	1.7e-18	93.5
Bn-A01-p1372430	A01	1	100	50	0	0	1	50	1428896	1428945	1.7e-18	93.5
Bn-A01-p1373104	A01	1	100	50	0	0	1	50	1429670	1429621	1.7e-18	93.5
Bn-A01-p1373239	A01	1	100	50	0	0	1	50	1429805	1429756	1.7e-18	93.5
Bn-A01-p1373827	A01	1	100	50	0	0	1	50	1430296	1430345	1.7e-18	93.5
Bn-A01-p1373838	A01	1	100	49	0	0	2	50	1430406	1430358	6.13e-18	91.6
Bn-A01-p1373965	A01	1	100	50	0	0	1	50	1430538	1430489	1.7e-18	93.5
Bn-A01-p1384609	A01	1	100	50	0	0	1	50	1440730	1440681	1.7e-18	93.5
Bn-A01-p1387174	A01	1	100	50	0	0	1	50	1443252	1443301	1.7e-18	93.5
Bn-A01-p1387769	A01	1	100	50	0	0	1	50	1443845	1443894	1.7e-18	93.5
Bn-A01-p1440009	A01	1	100	50	0	0	1	50	1493822	1493773	1.7e-18	93.5
Bn-A01-p1443389	A01	1	100	50	0	0	1	50	1497220	1497171	1.7e-18	93.5
Bn-A01-p1448811	A01	1	100	50	0	0	1	50	1502651	1502602	1.7e-18	93.5
Bn-A01-p1453156	A01	1	100	50	0	0	1	50	1506216	1506167	1.7e-18	93.5
Bn-A01-p1453560	A01	1	100	50	0	0	1	50	1506520	1506569	1.7e-18	93.5
Bn-A01-p1473188	A01	1	100	50	0	0	1	50	1525494	1525445	1.7e-18	93.5
Bn-scaff_15838_1-p1347959	A01	1	100	50	0	0	1	50	1580336	1580385	1.7e-18	93.5
Bn-A01-p1538603	A01	1	100	50	0	0	1	50	1588030	1587981	1.7e-18	93.5
Bn-A01-p1548460	A01	1	100	50	0	0	1	50	1598077	1598126	1.7e-18	93.5
Bn-A01-p1551223	A01	1	100	50	0	0	1	50	1600840	1600889	1.7e-18	93.5
Bn-A01-p1551700	A01	1	100	50	0	0	1	50	1601317	1601366	1.7e-18	93.5
Bn-A01-p1551913	A01	1	100	50	0	0	1	50	1601530	1601579	1.7e-18	93.5
Bn-A01-p1556145	A01	1	100	50	0	0	1	50	1603854	1603805	1.7e-18	93.5
Bn-A01-p1570727	A01	1	100	50	0	0	1	50	1622026	1622075	1.7e-18	93.5
Bn-A01-p1578682	A01	1	100	50	0	0	1	50	1629981	1630030	1.7e-18	93.5
Bn-A01-p1580970	A01	1	100	50	0	0	1	50	1632270	1632319	1.7e-18	93.5
Bn-A01-p1632686	A01	1	100	50	0	0	1	50	1679636	1679587	1.7e-18	93.5
Bn-A01-p1639922	A01	1	100	50	0	0	1	50	1686336	1686287	1.7e-18	93.5
Bn-A01-p1641033	A01	1	100	50	0	0	1	50	1687439	1687390	1.7e-18	93.5
Bn-A01-p1647693	A01	1	100	50	0	0	1	50	1704254	1704205	1.7e-18	93.5
Bn-A01-p1661180	A01	1	100	50	0	0	1	50	1717283	1717234	1.7e-18	93.5
Bn-A01-p1666732	A01	1	100	50	0	0	1	50	1722889	1722840	1.7e-18	93.5
Bn-A01-p1678541	A01	1	100	50	0	0	1	50	1742171	1742122	1.7e-18	93.5
Bn-A01-p1719658	A01	1	100	50	0	0	1	50	1781227	1781178	1.7e-18	93.5
Bn-A01-p1742846	A01	1	100	50	0	0	1	50	1810368	1810319	1.7e-18	93.5
Bn-A01-p1768443	A01	1	100	50	0	0	1	50	1829717	1829668	1.7e-18	93.5
Bn-A01-p1770291	A01	1	100	50	0	0	1	50	1831471	1831520	1.7e-18	93.5
Bn-A01-p1770482	A01	1	100	50	0	0	1	50	1831663	1831712	1.7e-18	93.5
Bn-A01-p1772621	A01	1	100	50	0	0	1	50	1832216	1832265	1.7e-18	93.5
Bn-A01-p1773289	A01	1	98	50	0	1	1	50	1833028	1832980	2.85e-16	86.1
Bn-A01-p1831507	A01	1	100	50	0	0	1	50	1890865	1890914	1.7e-18	93.5
Bn-A01-p1842079	A01	1	100	50	0	0	1	50	1904966	1904917	1.7e-18	93.5
Bn-A01-p1879401	A01	1	100	50	0	0	1	50	1942197	1942246	1.7e-18	93.5
Bn-A01-p1880406	A01	1	100	50	0	0	1	50	1943241	1943290	1.7e-18	93.5
Bn-A01-p1929982	A01	1	100	50	0	0	1	50	1979259	1979308	1.7e-18	93.5
Bn-A01-p1975231	A01	1	100	50	0	0	1	50	2009533	2009484	1.7e-18	93.5
Bn-A01-p1980181	A01	1	100	50	0	0	1	50	2014476	2014427	1.7e-18	93.5
Bn-A01-p1990755	A01	1	100	50	0	0	1	50	2024947	2024996	1.7e-18	93.5
Bn-A01-p1993302	A01	1	100	50	0	0	1	50	2028475	2028426	1.7e-18	93.5
Bn-A01-p2069218	A01	1	100	50	0	0	1	50	2107341	2107390	1.7e-18	93.5
Bn-A01-p2069488	A01	1	100	50	0	0	1	50	2107611	2107660	1.7e-18	93.5
Bn-A01-p2091322	A01	1	100	50	0	0	1	50	2128218	2128267	1.7e-18	93.5
Bn-A01-p2094793	A01	1	100	50	0	0	1	50	2132242	2132291	1.7e-18	93.5
Bn-A01-p2111978	A01	1	100	50	0	0	1	50	2145622	2145573	1.7e-18	93.5
Bn-A01-p2114552	A01	1	100	50	0	0	1	50	2148201	2148152	1.7e-18	93.5
Bn-A01-p2148059	A01	1	100	50	0	0	1	50	2176813	2176862	1.7e-18	93.5
Bn-A01-p2158511	A01	1	100	50	0	0	1	50	2190179	2190228	1.7e-18	93.5
Bn-A01-p2171217	A01	1	100	50	0	0	1	50	2203154	2203203	1.7e-18	93.5
Bn-A01-p2187099	A01	1	100	50	0	0	1	50	2219214	2219165	1.7e-18	93.5
Bn-A01-p2197976	A01	1	100	50	0	0	1	50	2227185	2227234	1.7e-18	93.5
Bn-A01-p2202853	A01	1	100	49	0	0	1	49	2232236	2232284	6.13e-18	91.6
Bn-A01-p2207452	A01	1	100	50	0	0	1	50	2236841	2236890	1.7e-18	93.5
Bn-A01-p2242890	A01	1	100	50	0	0	1	50	2272399	2272350	1.7e-18	93.5
Bn-A01-p2244327	A01	1	100	50	0	0	1	50	2273792	2273743	1.7e-18	93.5
Bn-A01-p2254072	A01	1	100	50	0	0	1	50	2283187	2283138	1.7e-18	93.5
Bn-A01-p2254235	A01	1	100	50	0	0	1	50	2283350	2283301	1.7e-18	93.5
Bn-A01-p2261903	A01	1	100	50	0	0	1	50	2292682	2292633	1.7e-18	93.5
Bn-A01-p2291940	A01	1	100	50	0	0	1	50	2317745	2317696	1.7e-18	93.5
Bn-A01-p2303308	A01	1	100	50	0	0	1	50	2324834	2324883	1.7e-18	93.5
Bn-A01-p2306938	A01	1	100	50	0	0	1	50	2328527	2328576	1.7e-18	93.5
Bn-A01-p2307144	A01	1	100	50	0	0	1	50	2328834	2328785	1.7e-18	93.5
Bn-A01-p2311015	A01	1	100	50	0	0	1	50	2332671	2332622	1.7e-18	93.5
Bn-A01-p2318972	A01	1	100	50	0	0	1	50	2341924	2341973	1.7e-18	93.5
Bn-A01-p2329932	A01	1	100	50	0	0	1	50	2360894	2360943	1.7e-18	93.5
Bn-A01-p2340048	A01	1	100	50	0	0	1	50	2368249	2368200	1.7e-18	93.5
Bn-A01-p2340359	A01	1	100	50	0	0	1	50	2376004	2376053	1.7e-18	93.5
Bn-A01-p2341408	A01	1	100	50	0	0	1	50	2376873	2376824	1.7e-18	93.5
Bn-A01-p2365493	A01	1	100	50	0	0	1	50	2407356	2407307	1.7e-18	93.5
Bn-A01-p2365667	A01	1	100	50	0	0	1	50	2407429	2407478	1.7e-18	93.5
Bn-A01-p2387124	A01	1	100	50	0	0	1	50	2426504	2426455	1.7e-18	93.5
Bn-A01-p2421445	A01	1	100	50	0	0	1	50	2460967	2461016	1.7e-18	93.5
Bn-A01-p2445274	A01	1	100	49	0	0	1	49	2483920	2483968	6.13e-18	91.6
Bn-A01-p2445468	A01	1	100	50	0	0	1	50	2484214	2484165	1.7e-18	93.5
Bn-A01-p2445602	A01	1	100	50	0	0	1	50	2484348	2484299	1.7e-18	93.5
Bn-A01-p2448162	A01	1	100	49	0	0	1	49	2488230	2488182	6.13e-18	91.6
Bn-A01-p2453633	A01	1	100	50	0	0	1	50	2488617	2488666	1.7e-18	93.5
Bn-A01-p2453758	A01	1	100	50	0	0	1	50	2488742	2488791	1.7e-18	93.5
Bn-A01-p2478055	A01	1	100	50	0	0	1	50	2521654	2521605	1.7e-18	93.5
Bn-A01-p2491976	A01	1	100	50	0	0	1	50	2535669	2535620	1.7e-18	93.5
Bn-A01-p2501423	A01	1	100	50	0	0	1	50	2545295	2545246	1.7e-18	93.5
Bn-A01-p2509163	A01	1	100	50	0	0	1	50	2554444	2554493	1.7e-18	93.5
Bn-A01-p2533727	A01	1	100	50	0	0	1	50	2584752	2584801	1.7e-18	93.5
Bn-A01-p2538180	A01	1	100	50	0	0	1	50	2589305	2589256	1.7e-18	93.5
Bn-A01-p2553345	A01	1	100	50	0	0	1	50	2609669	2609620	1.7e-18	93.5
Bn-A01-p2569303	A01	1	100	50	0	0	1	50	2625700	2625651	1.7e-18	93.5
Bn-A01-p2587709	A01	1	100	50	0	0	1	50	2650044	2649995	1.7e-18	93.5
Bn-A01-p2608660	A01	1	100	50	0	0	1	50	2670529	2670480	1.7e-18	93.5
Bn-A01-p2624222	A01	1	100	50	0	0	1	50	2683981	2684030	1.7e-18	93.5
Bn-A01-p2634563	A01	1	100	50	0	0	1	50	2697298	2697347	1.7e-18	93.5
Bn-A01-p2637699	A01	1	100	50	0	0	1	50	2700466	2700515	1.7e-18	93.5
Bn-A01-p2667471	A01	1	100	50	0	0	1	50	2736408	2736457	1.7e-18	93.5
Bn-A01-p2667691	A01	1	100	50	0	0	1	50	2736624	2736673	1.7e-18	93.5
Bn-A01-p2668951	A01	1	100	50	0	0	1	50	2737884	2737933	1.7e-18	93.5
Bn-A01-p2688662	A01	1	100	50	0	0	1	50	2758237	2758286	1.7e-18	93.5
Bn-A01-p2694323	A01	1	100	50	0	0	1	50	2763890	2763939	1.7e-18	93.5
Bn-A01-p2699907	A01	1	100	50	0	0	1	50	2769491	2769540	1.7e-18	93.5
Bn-A01-p2713583	A01	1	100	50	0	0	1	50	2784356	2784405	1.7e-18	93.5
Bn-A01-p2713528	A01	1	100	50	0	0	1	50	2784401	2784352	1.7e-18	93.5
Bn-A01-p2718126	A01	1	100	50	0	0	1	50	2789450	2789499	1.7e-18	93.5
Bn-A01-p2746862	A01	1	100	50	0	0	1	50	2820135	2820086	1.7e-18	93.5
Bn-A01-p2841043	A01	1	100	50	0	0	1	50	2911782	2911733	1.7e-18	93.5
Bn-A01-p2864193	A01	1	100	50	0	0	1	50	2929545	2929496	1.7e-18	93.5
Bn-A01-p2867284	A01	1	100	50	0	0	1	50	2932634	2932585	1.7e-18	93.5
Bn-A01-p2882270	A01	1	100	50	0	0	1	50	2948995	2949044	1.7e-18	93.5
Bn-A01-p2884934	A01	1	100	50	0	0	1	50	2951654	2951703	1.7e-18	93.5
Bn-A01-p2891863	A01	1	100	50	0	0	1	50	2958584	2958633	1.7e-18	93.5
Bn-A01-p2910608	A01	1	100	50	0	0	1	50	2987536	2987487	1.7e-18	93.5
Bn-A01-p2910752	A01	1	100	50	0	0	1	50	2987680	2987631	1.7e-18	93.5
Bn-A01-p2915821	A01	1	100	50	0	0	1	50	2993659	2993708	1.7e-18	93.5
Bn-A01-p2928824	A01	1	100	50	0	0	1	50	3008074	3008025	1.7e-18	93.5
Bn-A01-p2957869	A01	1	100	50	0	0	1	50	3030711	3030760	1.7e-18	93.5
Bn-A01-p2961857	A01	1	100	50	0	0	1	50	3038225	3038176	1.7e-18	93.5
Bn-A01-p2990104	A01	1	100	50	0	0	1	50	3062465	3062514	1.7e-18	93.5
Bn-A01-p3005310	A01	1	100	50	0	0	1	50	3076706	3076755	1.7e-18	93.5
Bn-A01-p3045984	A01	1	100	50	0	0	1	50	3115380	3115429	1.7e-18	93.5
Bn-A01-p3050613	A01	1	100	50	0	0	1	50	3119752	3119801	1.7e-18	93.5
Bn-A01-p3059596	A01	1	100	50	0	0	1	50	3127882	3127833	1.7e-18	93.5
Bn-A01-p3061223	A01	1	100	50	0	0	1	50	3129366	3129415	1.7e-18	93.5
Bn-A01-p3069312	A01	1	100	50	0	0	1	50	3137555	3137506	1.7e-18	93.5
Bn-A01-p3076531	A01	1	100	50	0	0	1	50	3144645	3144596	1.7e-18	93.5
Bn-A01-p3077309	A01	1	100	50	0	0	1	50	3145326	3145375	1.7e-18	93.5
Bn-A01-p3085248	A01	1	100	47	0	0	1	47	3153210	3153256	7.93e-17	87.9
Bn-A01-p3097105	A01	1	100	50	0	0	1	50	3164473	3164424	1.7e-18	93.5
Bn-A01-p3100346	A01	1	100	50	0	0	1	50	3167675	3167626	1.7e-18	93.5
Bn-A01-p3111607	A01	1	100	50	0	0	1	50	3178730	3178681	1.7e-18	93.5
Bn-A01-p3136468	A01	1	100	50	0	0	1	50	3203327	3203376	1.7e-18	93.5
Bn-A01-p3152636	A01	1	100	50	0	0	1	50	3230048	3229999	1.7e-18	93.5
Bn-A01-p3179210	A01	1	100	50	0	0	1	50	3253948	3253997	1.7e-18	93.5
Bn-A01-p3183888	A01	1	100	50	0	0	1	50	3258721	3258672	1.7e-18	93.5
Bn-A01-p3226309	A01	1	100	50	0	0	1	50	3285251	3285202	1.7e-18	93.5
Bn-A01-p3232810	A01	1	100	50	0	0	1	50	3286074	3286025	1.7e-18	93.5
Bn-A01-p3233299	A01	1	100	50	0	0	1	50	3286463	3286512	1.7e-18	93.5
Bn-A01-p3233247	A01	1	100	50	0	0	1	50	3286511	3286462	1.7e-18	93.5
Bn-A01-p3279678	A01	1	100	50	0	0	1	50	3330279	3330230	1.7e-18	93.5
Bn-A01-p3306526	A01	1	100	50	0	0	1	50	3357580	3357531	1.7e-18	93.5
Bn-A01-p3307173	A01	1	100	50	0	0	1	50	3358227	3358178	1.7e-18	93.5
Bn-A01-p3323476	A01	1	100	50	0	0	1	50	3364679	3364630	1.7e-18	93.5
Bn-A01-p3378332	A01	1	100	50	0	0	1	50	3408401	3408450	1.7e-18	93.5
Bn-A01-p3495476	A01	1	100	50	0	0	1	50	3527094	3527045	1.7e-18	93.5
Bn-A01-p3567127	A01	1	100	50	0	0	1	50	3607523	3607474	1.7e-18	93.5
Bn-A01-p3576068	A01	1	100	50	0	0	1	50	3616362	3616411	1.7e-18	93.5
Bn-A01-p3579887	A01	1	100	50	0	0	1	50	3620572	3620523	1.7e-18	93.5
Bn-A01-p3597929	A01	1	100	50	0	0	1	50	3654633	3654584	1.7e-18	93.5
Bn-A01-p3598097	A01	1	100	50	0	0	1	50	3654701	3654750	1.7e-18	93.5
Bn-A01-p3598515	A01	1	100	50	0	0	1	50	3655118	3655167	1.7e-18	93.5
Bn-A01-p3598533	A01	1	100	50	0	0	1	50	3655236	3655187	1.7e-18	93.5
Bn-A01-p3599097	A01	1	100	50	0	0	1	50	3655800	3655751	1.7e-18	93.5
Bn-A01-p3619975	A01	1	100	50	0	0	1	50	3672102	3672151	1.7e-18	93.5
Bn-A01-p3631990	A01	1	100	50	0	0	1	50	3685408	3685359	1.7e-18	93.5
Bn-A01-p3737522	A01	1	100	50	0	0	1	50	3813298	3813249	1.7e-18	93.5
Bn-A01-p3755849	A01	1	100	50	0	0	1	50	3833344	3833393	1.7e-18	93.5
Bn-Scaffold006869-p236	A01	1	100	50	0	0	1	50	3858536	3858585	1.7e-18	93.5
Bn-A01-p3789302	A01	1	100	50	0	0	1	50	3860169	3860218	1.7e-18	93.5
Bn-A01-p3791028	A01	1	100	50	0	0	1	50	3861896	3861945	1.7e-18	93.5
Bn-A01-p3889035	A01	1	100	50	0	0	1	50	3943353	3943402	1.7e-18	93.5
Bn-A01-p3904495	A01	1	100	50	0	0	1	50	3963889	3963840	1.7e-18	93.5
Bn-A01-p3906965	A01	1	100	50	0	0	1	50	3966440	3966489	1.7e-18	93.5
Bn-A01-p3938241	A01	1	100	50	0	0	1	50	3997850	3997801	1.7e-18	93.5
Bn-A01-p3948389	A01	1	100	50	0	0	1	50	4001252	4001203	1.7e-18	93.5
Bn-A01-p3984534	A01	1	100	50	0	0	1	50	4044747	4044796	1.7e-18	93.5
Bn-A01-p4003991	A01	1	100	50	0	0	1	50	4066284	4066235	1.7e-18	93.5
Bn-A01-p4023655	A01	1	100	50	0	0	1	50	4091015	4091064	1.7e-18	93.5
Bn-A01-p4027402	A01	1	100	50	0	0	1	50	4094846	4094797	1.7e-18	93.5
Bn-A01-p4077105	A01	1	100	50	0	0	1	50	4148443	4148394	1.7e-18	93.5
Bn-A01-p4084366	A01	1	100	50	0	0	1	50	4155961	4155912	1.7e-18	93.5
Bn-A01-p4087533	A01	1	100	50	0	0	1	50	4159270	4159319	1.7e-18	93.5
Bn-A01-p4164843	A01	1	98	50	1	0	1	50	4247009	4247058	7.93e-17	87.9
Bn-A01-p4173668	A01	1	100	50	0	0	1	50	4255458	4255507	1.7e-18	93.5
Bn-A01-p4177941	A01	1	100	50	0	0	1	50	4259779	4259828	1.7e-18	93.5
Bn-scaff_19193_1-p618891	A01	1	100	50	0	0	1	50	4265938	4265889	1.7e-18	93.5
Bn-A01-p4188629	A01	1	98	50	1	0	1	50	4272507	4272556	7.93e-17	87.9
Bn-A01-p4227703	A01	1	100	50	0	0	1	50	4314109	4314060	1.7e-18	93.5
Bn-A01-p4228985	A01	1	100	50	0	0	1	50	4315290	4315339	1.7e-18	93.5
Bn-A01-p4230829	A01	1	100	50	0	0	1	50	4317133	4317182	1.7e-18	93.5
Bn-A01-p4233306	A01	1	100	50	0	0	1	50	4320954	4320905	1.7e-18	93.5
Bn-A01-p4235273	A01	1	100	50	0	0	1	50	4324409	4324458	1.7e-18	93.5
Bn-A01-p4293847	A01	1	100	49	0	0	1	49	4378731	4378779	6.13e-18	91.6
Bn-A01-p4293878	A01	1	100	50	0	0	1	50	4378861	4378812	1.7e-18	93.5
Bn-A01-p4310302	A01	1	100	50	0	0	1	50	4411364	4411413	1.7e-18	93.5
Bn-A01-p4311134	A01	1	100	50	0	0	1	50	4412468	4412419	1.7e-18	93.5
Bn-A01-p4353657	A01	1	100	50	0	0	1	50	4453935	4453886	1.7e-18	93.5
Bn-A01-p4354753	A01	1	100	50	0	0	1	50	4455014	4454965	1.7e-18	93.5
Bn-A01-p4377760	A01	1	100	50	0	0	1	50	4650133	4650084	1.7e-18	93.5
Bn-A01-p4419443	A01	1	100	50	0	0	1	50	4693477	4693526	1.7e-18	93.5
Bn-A01-p4452779	A01	1	100	50	0	0	1	50	4720549	4720500	1.7e-18	93.5
Bn-A01-p4518460	A01	1	100	50	0	0	1	50	4796946	4796897	1.7e-18	93.5
Bn-A01-p4519762	A01	1	100	50	0	0	1	50	4798137	4798186	1.7e-18	93.5
Bn-A01-p4549564	A01	1	100	50	0	0	1	50	4828609	4828560	1.7e-18	93.5
Bn-A01-p4635210	A01	1	100	50	0	0	1	50	4906008	4905959	1.7e-18	93.5
Bn-A01-p4641747	A01	1	100	50	0	0	1	50	4912314	4912363	1.7e-18	93.5
Bn-A01-p4641802	A01	1	100	50	0	0	1	50	4912369	4912418	1.7e-18	93.5
Bn-A01-p4651746	A01	1	100	50	0	0	1	50	4923176	4923225	1.7e-18	93.5
Bn-A01-p4774065	A01	1	98	50	0	1	1	50	5027661	5027613	2.85e-16	86.1
Bn-A01-p4785261	A01	1	100	50	0	0	1	50	5044840	5044889	1.7e-18	93.5
Bn-A01-p4786653	A01	1	100	50	0	0	1	50	5046341	5046292	1.7e-18	93.5
Bn-A01-p4786754	A01	1	100	50	0	0	1	50	5046342	5046391	1.7e-18	93.5
Bn-A01-p4786787	A01	1	100	50	0	0	1	50	5046475	5046426	1.7e-18	93.5
Bn-A01-p4787515	A01	1	100	50	0	0	1	50	5047248	5047199	1.7e-18	93.5
Bn-A01-p4799050	A01	1	100	50	0	0	1	50	5058058	5058107	1.7e-18	93.5
Bn-A01-p4803773	A01	1	100	50	0	0	1	50	5062943	5062894	1.7e-18	93.5
Bn-A01-p4808404	A01	1	100	50	0	0	1	50	5067444	5067493	1.7e-18	93.5
Bn-A01-p4812269	A01	1	100	50	0	0	1	50	5071266	5071315	1.7e-18	93.5
Bn-A01-p4820187	A01	1	100	50	0	0	1	50	5074164	5074213	1.7e-18	93.5
Bn-A01-p4826685	A01	1	100	49	0	0	1	49	5081500	5081548	6.13e-18	91.6
Bn-A01-p4833020	A01	1	100	50	0	0	1	50	5083864	5083815	1.7e-18	93.5
Bn-A01-p4836338	A01	1	98.039	51	0	1	1	50	5087524	5087474	7.93e-17	87.9
Bn-A01-p4877343	A01	1	100	50	0	0	1	50	5126413	5126462	1.7e-18	93.5
Bn-A01-p4883188	A01	1	100	50	0	0	1	50	5132358	5132309	1.7e-18	93.5
Bn-A01-p4908924	A01	1	100	50	0	0	1	50	5162454	5162503	1.7e-18	93.5
Bn-A01-p4909065	A01	1	100	50	0	0	1	50	5162596	5162645	1.7e-18	93.5
Bn-A01-p4920622	A01	1	100	50	0	0	1	50	5166032	5165983	1.7e-18	93.5
Bn-A01-p4940549	A01	1	100	50	0	0	1	50	5192288	5192337	1.7e-18	93.5
Bn-A01-p4947577	A01	1	100	50	0	0	1	50	5199636	5199587	1.7e-18	93.5
Bn-A01-p4985329	A01	1	100	50	0	0	1	50	5238927	5238878	1.7e-18	93.5
Bn-A01-p5017446	A01	1	100	50	0	0	1	50	5260612	5260563	1.7e-18	93.5
Bn-A01-p5069371	A01	1	100	50	0	0	1	50	5304065	5304114	1.7e-18	93.5
Bn-A01-p5070565	A01	1	100	50	0	0	1	50	5305357	5305308	1.7e-18	93.5
Bn-A01-p5070836	A01	1	100	50	0	0	1	50	5305627	5305578	1.7e-18	93.5
Bn-A01-p5071350	A01	1	100	50	0	0	1	50	5306141	5306092	1.7e-18	93.5
Bn-A01-p5071658	A01	1	100	50	0	0	1	50	5306350	5306399	1.7e-18	93.5
Bn-A01-p5075984	A01	1	100	50	0	0	1	50	5315327	5315278	1.7e-18	93.5
Bn-A01-p5089377	A01	1	100	50	0	0	1	50	5318972	5318923	1.7e-18	93.5
Bn-A01-p5212238	A01	1	100	50	0	0	1	50	5502015	5502064	1.7e-18	93.5
Bn-A01-p5238564	A01	1	100	50	0	0	1	50	5525060	5525109	1.7e-18	93.5
Bn-A01-p5239959	A01	1	100	50	0	0	1	50	5526456	5526505	1.7e-18	93.5
Bn-A01-p5243029	A01	1	100	50	0	0	1	50	5529526	5529575	1.7e-18	93.5
Bn-A01-p5242967	A01	1	100	50	0	0	1	50	5529564	5529515	1.7e-18	93.5
Bn-A01-p5243036	A01	1	100	50	0	0	1	50	5529633	5529584	1.7e-18	93.5
Bn-A01-p5243181	A01	1	100	50	0	0	1	50	5529778	5529729	1.7e-18	93.5
Bn-A01-p5245778	A01	1	100	50	0	0	1	50	5532291	5532340	1.7e-18	93.5
Bn-A01-p5296564	A01	1	100	50	0	0	1	50	5595248	5595297	1.7e-18	93.5
Bn-A01-p5318059	A01	1	100	50	0	0	1	50	5611468	5611517	1.7e-18	93.5
Bn-A01-p5324399	A01	1	100	50	0	0	1	50	5617815	5617864	1.7e-18	93.5
Bn-A01-p5324472	A01	1	100	50	0	0	1	50	5617888	5617937	1.7e-18	93.5
Bn-A01-p5328220	A01	1	100	50	0	0	1	50	5622746	5622697	1.7e-18	93.5
Bn-A01-p5330192	A01	1	100	50	0	0	1	50	5624708	5624659	1.7e-18	93.5
Bn-A01-p5332773	A01	1	100	50	0	0	1	50	5628261	5628310	1.7e-18	93.5
Bn-A01-p5335218	A01	1	100	50	0	0	1	50	5632241	5632290	1.7e-18	93.5
Bn-A01-p5335323	A01	1	100	50	0	0	1	50	5632346	5632395	1.7e-18	93.5
Bn-A01-p5335372	A01	1	100	50	0	0	1	50	5632496	5632447	1.7e-18	93.5
Bn-A01-p5385928	A01	1	100	50	0	0	1	50	5725101	5725150	1.7e-18	93.5
Bn-A01-p5391551	A01	1	100	50	0	0	1	50	5730916	5730965	1.7e-18	93.5
Bn-A01-p5418396	A01	1	100	50	0	0	1	50	5758119	5758070	1.7e-18	93.5
Bn-A01-p5469727	A01	1	100	50	0	0	1	50	5801890	5801939	1.7e-18	93.5
Bn-A01-p5480514	A01	1	100	50	0	0	1	50	5810007	5810056	1.7e-18	93.5
Bn-A01-p5480517	A01	1	100	50	0	0	1	50	5810110	5810061	1.7e-18	93.5
Bn-A01-p5481004	A01	1	100	50	0	0	1	50	5810596	5810547	1.7e-18	93.5
Bn-A01-p5485980	A01	1	100	50	0	0	1	50	5815123	5815172	1.7e-18	93.5
Bn-A01-p5486104	A01	1	100	50	0	0	1	50	5815347	5815298	1.7e-18	93.5
Bn-A01-p5522403	A01	1	100	50	0	0	1	50	5850013	5849964	1.7e-18	93.5
Bn-A01-p5522870	A01	1	100	50	0	0	1	50	5850382	5850431	1.7e-18	93.5
Bn-A01-p5567077	A01	1	100	50	0	0	1	50	5907109	5907158	1.7e-18	93.5
Bn-A01-p5567840	A01	1	100	50	0	0	1	50	5907875	5907924	1.7e-18	93.5
Bn-A01-p5570110	A01	1	100	50	0	0	1	50	5910497	5910448	1.7e-18	93.5
Bn-A01-p5579695	A01	1	100	50	0	0	1	50	5920383	5920432	1.7e-18	93.5
Bn-A01-p5586671	A01	1	100	50	0	0	1	50	5927197	5927246	1.7e-18	93.5
Bn-A01-p5586618	A01	1	100	50	0	0	1	50	5927244	5927195	1.7e-18	93.5
Bn-A01-p5586854	A01	1	100	50	0	0	1	50	5927366	5927415	1.7e-18	93.5
Bn-A01-p5591950	A01	1	100	50	0	0	1	50	5930830	5930781	1.7e-18	93.5
Bn-A01-p5595319	A01	1	100	50	0	0	1	50	5933574	5933623	1.7e-18	93.5
Bn-A01-p5599369	A01	1	100	50	0	0	1	50	5935768	5935719	1.7e-18	93.5
Bn-A01-p5601232	A01	1	100	50	0	0	1	50	5937556	5937605	1.7e-18	93.5
Bn-A01-p5635471	A01	1	100	47	0	0	4	50	5961641	5961687	7.93e-17	87.9
Bn-A01-p5647795	A01	1	100	50	0	0	1	50	5971093	5971142	1.7e-18	93.5
Bn-A01-p5648120	A01	1	100	50	0	0	1	50	5971418	5971467	1.7e-18	93.5
Bn-A01-p5658004	A01	1	100	50	0	0	1	50	5982407	5982358	1.7e-18	93.5
Bn-A01-p5661294	A01	1	100	50	0	0	1	50	5985617	5985666	1.7e-18	93.5
Bn-A01-p5663319	A01	1	100	50	0	0	1	50	5987642	5987691	1.7e-18	93.5
Bn-A01-p5665774	A01	1	100	50	0	0	1	50	5990194	5990145	1.7e-18	93.5
Bn-A01-p5678678	A01	1	100	50	0	0	1	50	6002399	6002350	1.7e-18	93.5
Bn-A01-p5679389	A01	1	100	50	0	0	1	50	6003110	6003061	1.7e-18	93.5
Bn-A01-p5680581	A01	1	100	50	0	0	1	50	6004211	6004162	1.7e-18	93.5
Bn-A01-p5680730	A01	1	100	50	0	0	1	50	6004360	6004311	1.7e-18	93.5
Bn-A01-p5688168	A01	1	100	49	0	0	1	49	6010262	6010310	6.13e-18	91.6
Bn-A01-p5699110	A01	1	100	50	0	0	1	50	6019630	6019581	1.7e-18	93.5
Bn-A01-p5718049	A01	1	100	46	0	0	5	50	6036783	6036828	2.85e-16	86.1
Bn-A01-p5730640	A01	1	100	50	0	0	1	50	6049643	6049594	1.7e-18	93.5
Bn-A01-p5731429	A01	1	100	50	0	0	1	50	6050432	6050383	1.7e-18	93.5
Bn-A01-p5731932	A01	1	100	50	0	0	1	50	6050835	6050884	1.7e-18	93.5
Bn-A01-p5737901	A01	1	100	50	0	0	1	50	6057192	6057241	1.7e-18	93.5
Bn-A01-p5762190	A01	1	100	50	0	0	1	50	6090700	6090749	1.7e-18	93.5
Bn-A01-p5775331	A01	1	100	50	0	0	1	50	6097858	6097907	1.7e-18	93.5
Bn-A01-p5777117	A01	1	100	50	0	0	1	50	6099691	6099740	1.7e-18	93.5
Bn-A01-p5787591	A01	1	100	50	0	0	1	50	6124179	6124130	1.7e-18	93.5
Bn-A01-p5796425	A01	1	100	50	0	0	1	50	6132987	6133036	1.7e-18	93.5
Bn-A01-p5805154	A01	1	100	50	0	0	1	50	6141637	6141686	1.7e-18	93.5
Bn-A01-p5806635	A01	1	100	50	0	0	1	50	6143149	6143198	1.7e-18	93.5
Bn-A01-p5808036	A01	1	100	50	0	0	1	50	6144557	6144606	1.7e-18	93.5
Bn-A01-p5835558	A01	1	100	50	0	0	1	50	6180046	6179997	1.7e-18	93.5
Bn-A01-p5868598	A01	1	100	50	0	0	1	50	6210244	6210293	1.7e-18	93.5
Bn-A01-p5878485	A01	1	100	50	0	0	1	50	6219907	6219858	1.7e-18	93.5
Bn-A01-p5899092	A01	1	100	50	0	0	1	50	6246722	6246771	1.7e-18	93.5
Bn-A01-p5917688	A01	1	100	50	0	0	1	50	6258375	6258326	1.7e-18	93.5
Bn-A01-p5918340	A01	1	100	50	0	0	1	50	6258927	6258976	1.7e-18	93.5
Bn-A01-p5943392	A01	1	100	50	0	0	1	50	6284603	6284652	1.7e-18	93.5
Bn-A01-p5944398	A01	1	100	50	0	0	1	50	6285763	6285714	1.7e-18	93.5
Bn-A01-p5949665	A01	1	100	49	0	0	1	49	6290644	6290692	6.13e-18	91.6
Bn-A01-p5973643	A01	1	100	46	0	0	1	46	6309856	6309811	2.85e-16	86.1
Bn-A01-p5977820	A01	1	100	50	0	0	1	50	6311525	6311476	1.7e-18	93.5
Bn-A01-p5990203	A01	1	100	50	0	0	1	50	6320318	6320367	1.7e-18	93.5
Bn-A01-p5994840	A01	1	100	50	0	0	1	50	6325125	6325076	1.7e-18	93.5
Bn-A01-p5994980	A01	1	100	50	0	0	1	50	6325165	6325214	1.7e-18	93.5
Bn-A01-p6007093	A01	1	98	50	0	1	1	50	6338350	6338398	2.85e-16	86.1
Bn-A01-p6035491	A01	1	100	50	0	0	1	50	6375746	6375697	1.7e-18	93.5
Bn-A01-p6038249	A01	1	100	50	0	0	1	50	6378517	6378468	1.7e-18	93.5
Bn-A01-p6040667	A01	1	100	50	0	0	1	50	6380781	6380830	1.7e-18	93.5
Bn-A01-p6044475	A01	1	100	50	0	0	1	50	6384692	6384643	1.7e-18	93.5
Bn-A01-p6053633	A01	1	100	50	0	0	1	50	6396902	6396951	1.7e-18	93.5
Bn-A01-p6066325	A01	1	100	50	0	0	1	50	6408407	6408358	1.7e-18	93.5
Bn-A01-p6081978	A01	1	100	50	0	0	1	50	6419648	6419697	1.7e-18	93.5
Bn-A01-p6083015	A01	1	100	50	0	0	1	50	6420685	6420734	1.7e-18	93.5
Bn-A01-p6111016	A01	1	100	50	0	0	1	50	6452597	6452548	1.7e-18	93.5
Bn-A01-p6158889	A01	1	100	50	0	0	1	50	6503871	6503822	1.7e-18	93.5
Bn-A01-p6168163	A01	1	100	50	0	0	1	50	6510328	6510377	1.7e-18	93.5
Bn-A01-p6168191	A01	1	100	50	0	0	1	50	6510456	6510407	1.7e-18	93.5
Bn-A01-p6270054	A01	1	100	50	0	0	1	50	6598417	6598368	1.7e-18	93.5
Bn-A01-p6271245	A01	1	100	50	0	0	1	50	6599608	6599559	1.7e-18	93.5
Bn-A01-p6272642	A01	1	100	50	0	0	1	50	6601006	6600957	1.7e-18	93.5
Bn-A01-p6333910	A01	1	98	50	0	1	1	50	6648805	6648853	2.85e-16	86.1
Bn-A01-p6349933	A01	1	100	50	0	0	1	50	6665462	6665413	1.7e-18	93.5
Bn-A01-p6376105	A01	1	97.917	48	1	0	2	49	6694478	6694525	1.03e-15	84.2
Bn-A01-p6478922	A01	1	100	50	0	0	1	50	6822386	6822435	1.7e-18	93.5
Bn-A01-p6479735	A01	1	100	50	0	0	1	50	6823199	6823248	1.7e-18	93.5
Bn-A01-p6482543	A01	1	100	50	0	0	1	50	6825280	6825231	1.7e-18	93.5
Bn-A01-p6507432	A01	1	100	50	0	0	1	50	6842520	6842471	1.7e-18	93.5
Bn-A01-p6530903	A01	1	100	50	0	0	1	50	6861610	6861561	1.7e-18	93.5
Bn-A01-p6538362	A01	1	100	50	0	0	1	50	6868690	6868739	1.7e-18	93.5
Bn-A01-p6546245	A01	1	100	50	0	0	1	50	6876459	6876508	1.7e-18	93.5
Bn-A01-p6547052	A01	1	100	50	0	0	1	50	6877366	6877317	1.7e-18	93.5
Bn-A01-p6560270	A01	1	100	50	0	0	1	50	6890928	6890879	1.7e-18	93.5
Bn-A01-p6628035	A01	1	100	50	0	0	1	50	6945330	6945281	1.7e-18	93.5
Bn-A01-p6643749	A01	1	100	50	0	0	1	50	6961231	6961182	1.7e-18	93.5
Bn-A01-p6678914	A01	1	100	50	0	0	1	50	6983873	6983824	1.7e-18	93.5
Bn-A01-p6687839	A01	1	100	50	0	0	1	50	6993170	6993121	1.7e-18	93.5
Bn-A01-p6713213	A01	1	100	50	0	0	1	50	7018723	7018674	1.7e-18	93.5
Bn-A01-p6714740	A01	1	100	50	0	0	1	50	7020250	7020201	1.7e-18	93.5
Bn-A01-p6715317	A01	1	100	50	0	0	1	50	7020727	7020776	1.7e-18	93.5
Bn-A01-p6773750	A01	1	100	50	0	0	1	50	7063266	7063315	1.7e-18	93.5
Bn-A01-p6773949	A01	1	100	50	0	0	1	50	7063565	7063516	1.7e-18	93.5
Bn-A01-p6774097	A01	1	100	50	0	0	1	50	7063613	7063662	1.7e-18	93.5
Bn-A01-p6774837	A01	1	100	50	0	0	1	50	7064451	7064402	1.7e-18	93.5
Bn-A01-p6776950	A01	1	100	50	0	0	1	50	7066466	7066515	1.7e-18	93.5
Bn-A01-p6825673	A01	1	100	50	0	0	1	50	7134940	7134989	1.7e-18	93.5
Bn-A01-p6826327	A01	1	100	50	0	0	1	50	7135691	7135642	1.7e-18	93.5
Bn-scaff_25422_1-p95222	A01	1	100	50	0	0	1	50	7138273	7138322	1.7e-18	93.5
Bn-A01-p6841235	A01	1	100	50	0	0	1	50	7150085	7150134	1.7e-18	93.5
Bn-A01-p6854917	A01	1	100	50	0	0	1	50	7164128	7164177	1.7e-18	93.5
Bn-A01-p6877281	A01	1	100	50	0	0	1	50	7189626	7189577	1.7e-18	93.5
Bn-A01-p6898291	A01	1	96	50	2	0	1	50	7207963	7207914	3.69e-15	82.4
Bn-A01-p6900616	A01	1	100	50	0	0	1	50	7211491	7211540	1.7e-18	93.5
Bn-A01-p6907522	A01	1	100	50	0	0	1	50	7217969	7217920	1.7e-18	93.5
Bn-A01-p6925167	A01	1	100	50	0	0	1	50	7233349	7233300	1.7e-18	93.5
Bn-A01-p6958863	A01	1	100	50	0	0	1	50	7265144	7265095	1.7e-18	93.5
Bn-A01-p6959248	A01	1	100	50	0	0	1	50	7265529	7265480	1.7e-18	93.5
Bn-A01-p6965221	A01	1	100	50	0	0	1	50	7271403	7271452	1.7e-18	93.5
Bn-A01-p6968751	A01	1	100	50	0	0	1	50	7274933	7274982	1.7e-18	93.5
Bn-A01-p6969197	A01	1	100	50	0	0	1	50	7275379	7275428	1.7e-18	93.5
Bn-A01-p6969358	A01	1	100	50	0	0	1	50	7275540	7275589	1.7e-18	93.5
Bn-A01-p6969284	A01	1	100	50	0	0	1	50	7275566	7275517	1.7e-18	93.5
Bn-A01-p6972779	A01	1	100	50	0	0	1	50	7283932	7283883	1.7e-18	93.5
Bn-A01-p6986405	A01	1	100	50	0	0	1	50	7298352	7298303	1.7e-18	93.5
Bn-A01-p7068752	A01	1	98.039	51	0	1	1	50	7369069	7369119	7.93e-17	87.9
Bn-A01-p7069263	A01	1	100	50	0	0	1	50	7369572	7369621	1.7e-18	93.5
Bn-A01-p7086543	A01	1	100	50	0	0	1	50	7383769	7383818	1.7e-18	93.5
Bn-A01-p7087000	A01	1	100	50	0	0	1	50	7384326	7384277	1.7e-18	93.5
Bn-A01-p7132729	A01	1	100	50	0	0	1	50	7458666	7458617	1.7e-18	93.5
Bn-scaff_16323_1-p171333	A01	1	100	50	0	0	1	50	7461568	7461617	1.7e-18	93.5
Bn-A01-p7160702	A01	1	100	50	0	0	1	50	7481725	7481774	1.7e-18	93.5
Bn-A01-p7367598	A01	1	100	50	0	0	1	50	7680698	7680747	1.7e-18	93.5
Bn-A01-p7372570	A01	1	100	50	0	0	1	50	7685862	7685813	1.7e-18	93.5
Bn-A01-p7373427	A01	1	100	50	0	0	1	50	7686618	7686667	1.7e-18	93.5
Bn-A01-p7374589	A01	1	96	50	2	0	1	50	7687763	7687812	3.69e-15	82.4
Bn-A01-p7385409	A01	1	100	50	0	0	1	50	7698753	7698704	1.7e-18	93.5
Bn-A01-p7385797	A01	1	100	47	0	0	4	50	7699061	7699107	7.93e-17	87.9
Bn-A03-p28873781	A01	1	100	50	0	0	1	50	7716146	7716097	1.7e-18	93.5
Bn-A01-p7399827	A01	1	100	50	0	0	1	50	7723064	7723015	1.7e-18	93.5
Bn-A01-p7405147	A01	1	100	50	0	0	1	50	7728975	7728926	1.7e-18	93.5
Bn-A01-p7405753	A01	1	100	50	0	0	1	50	7737601	7737552	1.7e-18	93.5
Bn-A01-p7406041	A01	1	100	50	0	0	1	50	7737889	7737840	1.7e-18	93.5
Bn-A01-p7430311	A01	1	100	50	0	0	1	50	7777986	7778035	1.7e-18	93.5
Bn-A01-p7430242	A01	1	100	50	0	0	1	50	7778017	7777968	1.7e-18	93.5
Bn-A01-p7452338	A01	1	100	50	0	0	1	50	7790643	7790692	1.7e-18	93.5
Bn-A01-p7455852	A01	1	100	50	0	0	1	50	7796121	7796072	1.7e-18	93.5
Bn-A01-p7479483	A01	1	100	50	0	0	1	50	7819977	7819928	1.7e-18	93.5
Bn-A01-p7487861	A01	1	98	50	0	1	1	50	7827908	7827860	2.85e-16	86.1
Bn-A01-p7512557	A01	1	100	50	0	0	1	50	7844072	7844023	1.7e-18	93.5
Bn-A01-p7533971	A01	1	100	50	0	0	1	50	7866593	7866544	1.7e-18	93.5
Bn-A01-p7548806	A01	1	100	50	0	0	1	50	7871786	7871737	1.7e-18	93.5
Bn-A01-p7551163	A01	1	100	50	0	0	1	50	7874053	7874102	1.7e-18	93.5
Bn-A01-p7554673	A01	1	100	50	0	0	1	50	7877491	7877540	1.7e-18	93.5
Bn-A01-p7557422	A01	1	100	50	0	0	1	50	7880308	7880357	1.7e-18	93.5
Bn-A01-p7558012	A01	1	100	50	0	0	1	50	7880997	7880948	1.7e-18	93.5
Bn-A01-p7558345	A01	1	100	50	0	0	1	50	7881330	7881281	1.7e-18	93.5
Bn-A01-p7559946	A01	1	100	50	0	0	1	50	7882833	7882882	1.7e-18	93.5
Bn-A01-p7560785	A01	1	100	50	0	0	1	50	7883399	7883448	1.7e-18	93.5
Bn-A06-p3708256	A01	1	100	49	0	0	2	50	7893840	7893792	6.13e-18	91.6
Bn-A01-p7573871	A01	1	100	50	0	0	1	50	7898430	7898479	1.7e-18	93.5
Bn-A01-p7574355	A01	1	100	50	0	0	1	50	7898914	7898963	1.7e-18	93.5
Bn-A01-p7582017	A01	1	100	50	0	0	1	50	7908824	7908775	1.7e-18	93.5
Bn-A01-p7593180	A01	1	100	50	0	0	1	50	7917269	7917318	1.7e-18	93.5
Bn-A01-p7603030	A01	1	100	50	0	0	1	50	7925290	7925339	1.7e-18	93.5
Bn-A01-p7615707	A01	1	98	50	1	0	1	50	7938175	7938126	7.93e-17	87.9
Bn-A01-p7619726	A01	1	98	50	0	1	1	50	7942022	7942070	2.85e-16	86.1
Bn-A01-p7643571	A01	1	100	50	0	0	1	50	7973433	7973482	1.7e-18	93.5
Bn-A01-p7646601	A01	1	100	50	0	0	1	50	7976668	7976619	1.7e-18	93.5
Bn-A01-p7648929	A01	1	100	50	0	0	1	50	7979012	7978963	1.7e-18	93.5
Bn-A01-p7667896	A01	1	100	50	0	0	1	50	8021512	8021463	1.7e-18	93.5
Bn-A01-p7699159	A01	1	100	50	0	0	1	50	8047112	8047161	1.7e-18	93.5
Bn-A01-p7702471	A01	1	100	50	0	0	1	50	8050559	8050510	1.7e-18	93.5
Bn-A01-p7714470	A01	1	100	50	0	0	1	50	8063690	8063641	1.7e-18	93.5
Bn-A01-p7745080	A01	1	100	50	0	0	1	50	8114289	8114240	1.7e-18	93.5
Bn-A01-p7768351	A01	1	100	50	0	0	1	50	8137113	8137162	1.7e-18	93.5
Bn-A01-p7825044	A01	1	100	50	0	0	1	50	8178070	8178021	1.7e-18	93.5
Bn-A01-p7834871	A01	1	100	49	0	0	1	49	8188199	8188151	6.13e-18	91.6
Bn-A01-p7861283	A01	1	100	50	0	0	1	50	8212619	8212570	1.7e-18	93.5
Bn-A01-p7875358	A01	1	100	50	0	0	1	50	8226602	8226651	1.7e-18	93.5
Bn-A01-p7889385	A01	1	100	50	0	0	1	50	8240789	8240740	1.7e-18	93.5
Bn-A01-p7897804	A01	1	100	50	0	0	1	50	8246185	8246234	1.7e-18	93.5
Bn-A01-p7942548	A01	1	98.039	51	0	1	1	50	8284325	8284275	7.93e-17	87.9
Bn-A01-p7953001	A01	1	100	50	0	0	1	50	8293943	8293992	1.7e-18	93.5
Bn-A01-p7973418	A01	1	100	50	0	0	1	50	8323695	8323744	1.7e-18	93.5
Bn-A01-p7982220	A01	1	100	50	0	0	1	50	8333754	8333803	1.7e-18	93.5
Bn-A01-p7983241	A01	1	100	50	0	0	1	50	8334744	8334793	1.7e-18	93.5
Bn-A01-p8017380	A01	1	100	50	0	0	1	50	8367789	8367838	1.7e-18	93.5
Bn-A01-p8043776	A01	1	100	50	0	0	1	50	8388861	8388910	1.7e-18	93.5
Bn-A01-p8045760	A01	1	100	50	0	0	1	50	8390945	8390896	1.7e-18	93.5
Bn-A01-p8046142	A01	1	100	50	0	0	1	50	8391227	8391276	1.7e-18	93.5
Bn-A01-p8051029	A01	1	100	50	0	0	1	50	8400434	8400483	1.7e-18	93.5
Bn-A01-p8051804	A01	1	100	50	0	0	1	50	8401309	8401260	1.7e-18	93.5
Bn-A01-p8058255	A01	1	100	50	0	0	1	50	8407811	8407762	1.7e-18	93.5
Bn-A01-p8058475	A01	1	100	50	0	0	1	50	8407930	8407979	1.7e-18	93.5
Bn-A01-p8063652	A01	1	100	50	0	0	1	50	8412050	8412099	1.7e-18	93.5
Bn-A01-p8111196	A01	1	100	50	0	0	1	50	8450934	8450983	1.7e-18	93.5
Bn-A01-p8115849	A01	1	100	50	0	0	1	50	8452563	8452514	1.7e-18	93.5
Bn-A01-p8116314	A01	1	100	50	0	0	1	50	8452905	8452954	1.7e-18	93.5
Bn-A01-p8121877	A01	1	100	50	0	0	1	50	8458562	8458513	1.7e-18	93.5
Bn-A01-p8129876	A01	1	100	50	0	0	1	50	8467512	8467561	1.7e-18	93.5
Bn-A01-p8154524	A01	1	100	50	0	0	1	50	8527378	8527427	1.7e-18	93.5
Bn-A01-p8221245	A01	1	100	50	0	0	1	50	8573348	8573299	1.7e-18	93.5
Bn-A01-p8240363	A01	1	100	50	0	0	1	50	8584474	8584425	1.7e-18	93.5
Bn-A01-p8242690	A01	1	100	50	0	0	1	50	8592887	8592838	1.7e-18	93.5
Bn-A01-p8246641	A01	1	100	50	0	0	1	50	8606512	8606463	1.7e-18	93.5
Bn-A01-p8263964	A01	1	98.039	51	0	1	1	50	8634826	8634876	7.93e-17	87.9
Bn-A01-p8276793	A01	1	100	50	0	0	1	50	8658155	8658204	1.7e-18	93.5
Bn-A01-p8353426	A01	1	100	50	0	0	1	50	8728640	8728689	1.7e-18	93.5
Bn-A01-p8417520	A01	1	98	50	1	0	1	50	8789378	8789427	7.93e-17	87.9
Bn-A01-p8418102	A01	1	100	50	0	0	1	50	8789960	8790009	1.7e-18	93.5
Bn-A01-p8439363	A01	1	100	50	0	0	1	50	8813051	8813100	1.7e-18	93.5
Bn-A01-p8450346	A01	1	96.154	52	0	1	1	50	8830061	8830010	1.03e-15	84.2
Bn-A01-p8452366	A01	1	100	50	0	0	1	50	8834639	8834688	1.7e-18	93.5
Bn-A01-p8452981	A01	1	100	50	0	0	1	50	8836206	8836255	1.7e-18	93.5
Bn-A01-p8470314	A01	1	100	50	0	0	1	50	8855460	8855411	1.7e-18	93.5
Bn-A01-p8501753	A01	1	100	50	0	0	1	50	8888479	8888528	1.7e-18	93.5
Bn-A01-p8675601	A01	1	100	50	0	0	1	50	9052861	9052812	1.7e-18	93.5
Bn-A01-p8675930	A01	1	100	50	0	0	1	50	9053313	9053362	1.7e-18	93.5
Bn-A01-p8676144	A01	1	100	50	0	0	1	50	9053527	9053576	1.7e-18	93.5
Bn-A01-p8681556	A01	1	100	50	0	0	1	50	9055720	9055671	1.7e-18	93.5
Bn-A01-p8681757	A01	1	100	50	0	0	1	50	9055922	9055873	1.7e-18	93.5
Bn-A01-p9180340	A01	1	100	50	0	0	1	50	9088264	9088313	1.7e-18	93.5
Bn-A01-p9180828	A01	1	100	50	0	0	1	50	9088754	9088803	1.7e-18	93.5
Bn-A01-p9203096	A01	1	100	50	0	0	1	50	9109501	9109550	1.7e-18	93.5
Bn-A01-p9220977	A01	1	100	50	0	0	1	50	9126823	9126872	1.7e-18	93.5
Bn-A01-p9223420	A01	1	100	50	0	0	1	50	9129473	9129424	1.7e-18	93.5
Bn-A01-p9254925	A01	1	100	50	0	0	1	50	9150776	9150727	1.7e-18	93.5
Bn-A01-p9259611	A01	1	100	50	0	0	1	50	9162028	9161979	1.7e-18	93.5
Bn-A01-p9260073	A01	1	100	50	0	0	1	50	9162490	9162441	1.7e-18	93.5
Bn-A01-p9264081	A01	1	98.039	51	0	1	1	50	9166236	9166286	7.93e-17	87.9
Bn-A01-p9325719	A01	1	100	50	0	0	1	50	9225391	9225342	1.7e-18	93.5
Bn-A01-p9326695	A01	1	100	50	0	0	1	50	9226247	9226296	1.7e-18	93.5
Bn-A01-p9337252	A01	1	100	50	0	0	1	50	9235654	9235703	1.7e-18	93.5
Bn-A01-p9360043	A01	1	100	50	0	0	1	50	9257802	9257851	1.7e-18	93.5
Bn-A01-p9360971	A01	1	100	50	0	0	1	50	9258730	9258779	1.7e-18	93.5
Bn-A01-p9369257	A01	1	100	50	0	0	1	50	9267297	9267248	1.7e-18	93.5
Bn-A01-p9442471	A01	1	100	50	0	0	1	50	9350696	9350647	1.7e-18	93.5
Bn-A01-p9443863	A01	1	100	50	0	0	1	50	9350783	9350832	1.7e-18	93.5
Bn-A01-p9445754	A01	1	100	50	0	0	1	50	9352727	9352776	1.7e-18	93.5
Bn-A01-p9469933	A01	1	100	50	0	0	1	50	9362841	9362792	1.7e-18	93.5
Bn-A01-p9476520	A01	1	100	50	0	0	1	50	9369529	9369480	1.7e-18	93.5
Bn-A01-p9519478	A01	1	100	50	0	0	1	50	9412621	9412572	1.7e-18	93.5
Bn-A01-p9523572	A01	1	100	50	0	0	1	50	9416594	9416643	1.7e-18	93.5
Bn-A01-p9565360	A01	1	100	50	0	0	1	50	9446168	9446119	1.7e-18	93.5
Bn-A01-p9565804	A01	1	100	50	0	0	1	50	9446612	9446563	1.7e-18	93.5
Bn-A01-p9599644	A01	1	100	47	0	0	1	47	9471790	9471744	7.93e-17	87.9
Bn-A01-p9614730	A01	1	100	50	0	0	1	50	9484294	9484245	1.7e-18	93.5
Bn-A01-p9619932	A01	1	100	50	0	0	1	50	9489550	9489501	1.7e-18	93.5
Bn-A01-p9621623	A01	1	100	50	0	0	1	50	9491153	9491202	1.7e-18	93.5
Bn-A07-p9516564	A01	1	100	50	0	0	1	50	9501263	9501312	1.7e-18	93.5
Bn-A01-p9699152	A01	1	100	50	0	0	1	50	9573670	9573621	1.7e-18	93.5
Bn-A01-p9711809	A01	1	100	50	0	0	1	50	9592548	9592597	1.7e-18	93.5
Bn-A01-p9712591	A01	1	100	50	0	0	1	50	9593391	9593342	1.7e-18	93.5
Bn-scaff_19614_1-p106170	A01	1	100	50	0	0	1	50	9694071	9694022	1.7e-18	93.5
Bn-A01-p9810552	A01	1	100	50	0	0	1	50	9694087	9694038	1.7e-18	93.5
Bn-A01-p9853365	A01	1	100	50	0	0	1	50	9739418	9739467	1.7e-18	93.5
Bn-A01-p9866468	A01	1	100	50	0	0	1	50	9752155	9752204	1.7e-18	93.5
Bn-A01-p9884449	A01	1	100	50	0	0	1	50	9771165	9771214	1.7e-18	93.5
Bn-A01-p9922741	A01	1	100	50	0	0	1	50	9814653	9814702	1.7e-18	93.5
Bn-A01-p9951633	A01	1	100	50	0	0	1	50	9854430	9854479	1.7e-18	93.5
Bn-A01-p9961553	A01	1	100	50	0	0	1	50	9871411	9871362	1.7e-18	93.5
Bn-scaff_27129_1-p179619	A01	1	100	50	0	0	1	50	9892438	9892389	1.7e-18	93.5
Bn-A01-p9989240	A01	1	98	50	0	1	1	50	9909432	9909384	2.85e-16	86.1
Bn-A01-p9996240	A01	1	100	50	0	0	1	50	9920681	9920632	1.7e-18	93.5
Bn-A01-p9996458	A01	1	100	50	0	0	1	50	9920799	9920848	1.7e-18	93.5
Bn-A01-p10026020	A01	1	100	50	0	0	1	50	9977378	9977427	1.7e-18	93.5
Bn-A01-p10027328	A01	1	100	50	0	0	1	50	9978786	9978737	1.7e-18	93.5
Bn-A01-p10036602	A01	1	100	50	0	0	1	50	9988403	9988354	1.7e-18	93.5
Bn-A01-p10069493	A01	1	100	50	0	0	1	50	10018905	10018954	1.7e-18	93.5
Bn-A01-p10071456	A01	1	100	50	0	0	1	50	10020958	10020909	1.7e-18	93.5
Bn-A01-p10071903	A01	1	100	50	0	0	1	50	10021404	10021355	1.7e-18	93.5
Bn-A01-p10181972	A01	1	100	50	0	0	1	50	10146284	10146235	1.7e-18	93.5
Bn-A01-p10231780	A01	1	100	50	0	0	1	50	10192664	10192713	1.7e-18	93.5
Bn-A01-p10242217	A01	1	100	45	0	0	1	45	10204666	10204622	1.03e-15	84.2
Bn-A01-p10250255	A01	1	100	50	0	0	1	50	10217564	10217515	1.7e-18	93.5
Bn-A01-p10251052	A01	1	100	50	0	0	1	50	10218361	10218312	1.7e-18	93.5
Bn-A01-p10278752	A01	1	100	50	0	0	1	50	10253466	10253515	1.7e-18	93.5
Bn-A01-p10285074	A01	1	100	50	0	0	1	50	10260250	10260201	1.7e-18	93.5
Bn-A01-p10297732	A01	1	100	50	0	0	1	50	10280027	10280076	1.7e-18	93.5
Bn-A01-p10299187	A01	1	100	50	0	0	1	50	10281498	10281547	1.7e-18	93.5
Bn-A01-p10343401	A01	1	100	50	0	0	1	50	10331675	10331626	1.7e-18	93.5
Bn-A01-p10344498	A01	1	100	50	0	0	1	50	10332772	10332723	1.7e-18	93.5
Bn-A01-p10345430	A01	1	100	50	0	0	1	50	10333704	10333655	1.7e-18	93.5
Bn-A01-p10346546	A01	1	100	50	0	0	1	50	10334822	10334773	1.7e-18	93.5
Bn-A01-p10354645	A01	1	100	50	0	0	1	50	10343449	10343400	1.7e-18	93.5
Bn-A01-p10392909	A01	1	100	50	0	0	1	50	10400408	10400359	1.7e-18	93.5
Bn-A01-p10426647	A01	1	98.039	51	0	1	1	50	10477254	10477204	7.93e-17	87.9
Bn-A01-p10426714	A01	1	100	50	0	0	1	50	10477320	10477271	1.7e-18	93.5
Bn-A01-p10427300	A01	1	100	50	0	0	1	50	10477800	10477849	1.7e-18	93.5
Bn-scaff_16217_1-p143344	A01	1	100	50	0	0	1	50	10505903	10505854	1.7e-18	93.5
Bn-A01-p10493092	A01	1	100	50	0	0	1	50	10563723	10563772	1.7e-18	93.5
Bn-A01-p10590357	A01	1	100	50	0	0	1	50	10605656	10605607	1.7e-18	93.5
Bn-A01-p10636637	A01	1	100	50	0	0	1	50	10643294	10643343	1.7e-18	93.5
Bn-A01-p10638747	A01	1	100	50	0	0	1	50	10645490	10645441	1.7e-18	93.5
Bn-A01-p10639421	A01	1	100	50	0	0	1	50	10646161	10646112	1.7e-18	93.5
Bn-A01-p10641656	A01	1	98.039	51	0	1	1	50	10648471	10648521	7.93e-17	87.9
Bn-A01-p10720611	A01	1	100	50	0	0	1	50	10727252	10727301	1.7e-18	93.5
Bn-A01-p10740084	A01	1	100	50	0	0	1	50	10746563	10746612	1.7e-18	93.5
Bn-A01-p10835605	A01	1	100	50	0	0	1	50	10845121	10845072	1.7e-18	93.5
Bn-A01-p10838493	A01	1	100	50	0	0	1	50	10848122	10848073	1.7e-18	93.5
Bn-A01-p10916044	A01	1	100	50	0	0	1	50	10880350	10880399	1.7e-18	93.5
Bn-A01-p10859527	A01	1	100	50	0	0	1	50	10964139	10964188	1.7e-18	93.5
Bn-A01-p10934377	A01	1	100	50	0	0	1	50	10995637	10995588	1.7e-18	93.5
Bn-A01-p10939144	A01	1	100	50	0	0	1	50	11000400	11000351	1.7e-18	93.5
Bn-A01-p10945930	A01	1	100	50	0	0	1	50	11003331	11003282	1.7e-18	93.5
Bn-A01-p10963536	A01	1	100	50	0	0	1	50	11031676	11031627	1.7e-18	93.5
Bn-A01-p10991782	A01	1	100	50	0	0	1	50	11050455	11050406	1.7e-18	93.5
Bn-A01-p11052248	A01	1	100	50	0	0	1	50	11120630	11120581	1.7e-18	93.5
Bn-A01-p11077627	A01	1	100	50	0	0	1	50	11135806	11135855	1.7e-18	93.5
Bn-A01-p11091663	A01	1	100	50	0	0	1	50	11139545	11139496	1.7e-18	93.5
Bn-A01-p11120400	A01	1	100	50	0	0	1	50	11161042	11161091	1.7e-18	93.5
Bn-A01-p11142752	A01	1	100	50	0	0	1	50	11175069	11175020	1.7e-18	93.5
Bn-A01-p11233207	A01	1	100	50	0	0	1	50	11257156	11257205	1.7e-18	93.5
Bn-A01-p11253272	A01	1	100	50	0	0	1	50	11276742	11276693	1.7e-18	93.5
Bn-A01-p11284636	A01	1	100	50	0	0	1	50	11320776	11320825	1.7e-18	93.5
Bn-A01-p11302783	A01	1	100	50	0	0	1	50	11345871	11345822	1.7e-18	93.5
Bn-A01-p11306490	A01	1	100	50	0	0	1	50	11349475	11349524	1.7e-18	93.5
Bn-A01-p11324370	A01	1	98.039	51	0	1	1	50	11363467	11363517	7.93e-17	87.9
Bn-A01-p11336370	A01	1	100	50	0	0	1	50	11375365	11375414	1.7e-18	93.5
Bn-A01-p11347791	A01	1	100	50	0	0	1	50	11382351	11382302	1.7e-18	93.5
Bn-A01-p11355643	A01	1	100	50	0	0	1	50	11390185	11390234	1.7e-18	93.5
Bn-A01-p11407167	A01	1	100	50	0	0	1	50	11447170	11447121	1.7e-18	93.5
Bn-A01-p11434769	A01	1	100	50	0	0	1	50	11480771	11480820	1.7e-18	93.5
Bn-A01-p11441851	A01	1	98	50	0	1	1	50	11486723	11486771	2.85e-16	86.1
Bn-A01-p11459295	A01	1	98	50	0	1	1	50	11499533	11499485	2.85e-16	86.1
Bn-A01-p11462315	A01	1	100	50	0	0	1	50	11502691	11502642	1.7e-18	93.5
Bn-A01-p11469596	A01	1	100	50	0	0	1	50	11509873	11509922	1.7e-18	93.5
Bn-A01-p11469992	A01	1	100	50	0	0	1	50	11510369	11510320	1.7e-18	93.5
Bn-A01-p11480814	A01	1	100	50	0	0	1	50	11525318	11525367	1.7e-18	93.5
Bn-A01-p11543126	A01	1	100	50	0	0	1	50	11631466	11631515	1.7e-18	93.5
Bn-A01-p11543191	A01	1	100	50	0	0	1	50	11631631	11631582	1.7e-18	93.5
Bn-A01-p11559064	A01	1	100	50	0	0	1	50	11648361	11648312	1.7e-18	93.5
Bn-A01-p11702957	A01	1	100	50	0	0	1	50	11724628	11724579	1.7e-18	93.5
Bn-A01-p11807124	A01	1	100	50	0	0	1	50	11855949	11855900	1.7e-18	93.5
Bn-A01-p11808121	A01	1	100	50	0	0	1	50	11857052	11857003	1.7e-18	93.5
Bn-A01-p11817698	A01	1	100	50	0	0	1	50	11866601	11866552	1.7e-18	93.5
Bn-A01-p11818901	A01	1	100	50	0	0	1	50	11867703	11867752	1.7e-18	93.5
Bn-A01-p11825880	A01	1	100	48	0	0	1	48	11872316	11872269	2.2e-17	89.8
Bn-A01-p11830957	A01	1	100	50	0	0	1	50	11877359	11877408	1.7e-18	93.5
Bn-Scaffold000444-p344	A01	1	100	50	0	0	1	50	11983073	11983024	1.7e-18	93.5
Bn-Scaffold000444-p5763	A01	1	100	50	0	0	1	50	11988405	11988454	1.7e-18	93.5
Bn-A01-p11938379	A01	1	100	50	0	0	1	50	12005298	12005249	1.7e-18	93.5
Bn-A01-p11947255	A01	1	100	50	0	0	1	50	12015209	12015160	1.7e-18	93.5
Bn-A01-p11951605	A01	1	100	50	0	0	1	50	12024147	12024196	1.7e-18	93.5
Bn-A01-p11955645	A01	1	100	50	0	0	1	50	12028186	12028235	1.7e-18	93.5
Bn-A01-p11965733	A01	1	100	50	0	0	1	50	12040950	12040901	1.7e-18	93.5
Bn-A01-p12077110	A01	1	100	50	0	0	1	50	12096174	12096223	1.7e-18	93.5
Bn-A01-p12098080	A01	1	100	50	0	0	1	50	12133972	12133923	1.7e-18	93.5
Bn-A01-p12138089	A01	1	100	50	0	0	1	50	12182124	12182075	1.7e-18	93.5
Bn-A01-p12179784	A01	1	100	50	0	0	1	50	12242069	12242118	1.7e-18	93.5
Bn-A01-p12192020	A01	1	100	50	0	0	1	50	12251614	12251663	1.7e-18	93.5
Bn-A01-p12206449	A01	1	100	50	0	0	1	50	12256758	12256709	1.7e-18	93.5
Bn-A01-p12221698	A01	1	100	50	0	0	1	50	12259387	12259436	1.7e-18	93.5
Bn-A01-p12222100	A01	1	98	50	0	1	1	50	12259883	12259835	2.85e-16	86.1
Bn-A01-p12222806	A01	1	100	50	0	0	1	50	12260531	12260580	1.7e-18	93.5
Bn-A01-p12302708	A01	1	100	50	0	0	1	50	12341795	12341844	1.7e-18	93.5
Bn-A01-p12305025	A01	1	100	50	0	0	1	50	12343503	12343454	1.7e-18	93.5
Bn-A01-p12305828	A01	1	100	47	0	0	4	50	12344208	12344254	7.93e-17	87.9
Bn-A01-p12306195	A01	1	96.154	52	0	1	1	50	12344572	12344623	1.03e-15	84.2
Bn-A01-p12308897	A01	1	100	50	0	0	1	50	12346290	12346339	1.7e-18	93.5
Bn-A01-p12309767	A01	1	100	50	0	0	1	50	12347249	12347200	1.7e-18	93.5
Bn-A01-p12314813	A01	1	100	50	0	0	1	50	12352725	12352774	1.7e-18	93.5
Bn-A01-p12350104	A01	1	98	50	0	1	1	50	12389873	12389825	2.85e-16	86.1
Bn-A01-p12352518	A01	1	100	46	0	0	5	50	12392189	12392234	2.85e-16	86.1
Bn-A01-p12380936	A01	1	100	50	0	0	1	50	12426141	12426092	1.7e-18	93.5
Bn-A01-p12387882	A01	1	98.039	51	0	1	1	50	12438716	12438766	7.93e-17	87.9
Bn-A01-p12399796	A01	1	100	50	0	0	1	50	12461590	12461639	1.7e-18	93.5
Bn-A01-p12400477	A01	1	100	50	0	0	1	50	12462370	12462321	1.7e-18	93.5
Bn-A01-p12427149	A01	1	100	50	0	0	1	50	12489037	12489086	1.7e-18	93.5
Bn-A01-p12454306	A01	1	100	50	0	0	1	50	12516597	12516646	1.7e-18	93.5
Bn-A01-p12456089	A01	1	100	50	0	0	1	50	12521110	12521061	1.7e-18	93.5
Bn-A01-p12516944	A01	1	100	50	0	0	1	50	12544798	12544847	1.7e-18	93.5
Bn-A01-p12484368	A01	1	100	50	0	0	1	50	12545918	12545869	1.7e-18	93.5
Bn-A01-p12510566	A01	1	100	50	0	0	1	50	12581384	12581335	1.7e-18	93.5
Bn-A01-p12522369	A01	1	100	50	0	0	1	50	12596567	12596616	1.7e-18	93.5
Bn-A01-p12535612	A01	1	100	50	0	0	1	50	12601919	12601870	1.7e-18	93.5
Bn-A01-p12539479	A01	1	100	50	0	0	1	50	12606344	12606393	1.7e-18	93.5
Bn-A01-p12539655	A01	1	100	50	0	0	1	50	12606523	12606572	1.7e-18	93.5
Bn-A01-p12543678	A01	1	100	50	0	0	1	50	12611168	12611217	1.7e-18	93.5
Bn-A01-p12544054	A01	1	100	50	0	0	1	50	12611657	12611608	1.7e-18	93.5
Bn-A01-p12560952	A01	1	100	50	0	0	1	50	12624359	12624408	1.7e-18	93.5
Bn-A01-p12577268	A01	1	100	50	0	0	1	50	12633436	12633485	1.7e-18	93.5
Bn-A01-p12591168	A01	1	100	50	0	0	1	50	12670939	12670890	1.7e-18	93.5
Bn-Scaffold000300-p4564	A01	1	100	50	0	0	1	50	12706634	12706585	1.7e-18	93.5
Bn-Scaffold000300-p17011	A01	1	100	50	0	0	1	50	12719406	12719357	1.7e-18	93.5
Bn-Scaffold000300-p20118	A01	1	100	50	0	0	1	50	12722620	12722571	1.7e-18	93.5
Bn-Scaffold000300-p29536	A01	1	100	50	0	0	1	50	12734966	12734917	1.7e-18	93.5
Bn-A01-p12618357	A01	1	100	50	0	0	1	50	12761690	12761641	1.7e-18	93.5
Bn-A01-p12622123	A01	1	100	50	0	0	1	50	12765590	12765639	1.7e-18	93.5
Bn-A01-p12625892	A01	1	100	50	0	0	1	50	12769575	12769526	1.7e-18	93.5
Bn-A01-p12665045	A01	1	100	50	0	0	1	50	12810993	12811042	1.7e-18	93.5
Bn-A01-p12665250	A01	1	100	50	0	0	1	50	12811198	12811247	1.7e-18	93.5
Bn-A01-p12734805	A01	1	100	50	0	0	1	50	12883349	12883300	1.7e-18	93.5
Bn-scaff_20250_1-p424693	A01	1	100	50	0	0	1	50	12891313	12891264	1.7e-18	93.5
Bn-A01-p12926196	A01	1	100	50	0	0	1	50	13090460	13090411	1.7e-18	93.5
Bn-Scaffold000253-p27839	A01	1	100	50	0	0	1	50	13219582	13219631	1.7e-18	93.5
Bn-A01-p15865197	A01	1	100	50	0	0	1	50	13254585	13254536	1.7e-18	93.5
Bn-A01-p15695152	A01	1	100	50	0	0	1	50	13429577	13429528	1.7e-18	93.5
Bn-A04-p2909242	A01	1	100	50	0	0	1	50	13437867	13437916	1.7e-18	93.5
Bn-A04-p2906681	A01	1	100	50	0	0	1	50	13440427	13440476	1.7e-18	93.5
Bn-A01-p15502589	A01	1	100	50	0	0	1	50	13602907	13602858	1.7e-18	93.5
Bn-A01-p15497190	A01	1	100	50	0	0	1	50	13604339	13604290	1.7e-18	93.5
Bn-A01-p15496772	A01	1	100	50	0	0	1	50	13604756	13604707	1.7e-18	93.5
Bn-A01-p15496639	A01	1	98.039	51	0	1	1	50	13604789	13604839	7.93e-17	87.9
Bn-A01-p15494469	A01	1	100	50	0	0	1	50	13607244	13607195	1.7e-18	93.5
Bn-A01-p15489266	A01	1	100	50	0	0	1	50	13614702	13614751	1.7e-18	93.5
Bn-A01-p15487080	A01	1	100	50	0	0	1	50	13621743	13621694	1.7e-18	93.5
Bn-A01-p15481986	A01	1	100	50	0	0	1	50	13625565	13625614	1.7e-18	93.5
Bn-A01-p15476640	A01	1	98	50	1	0	1	50	13631846	13631895	7.93e-17	87.9
Bn-A01-p15474986	A01	1	98.039	51	0	1	1	50	13633486	13633536	7.93e-17	87.9
Bn-A01-p15475038	A01	1	98.039	51	0	1	1	50	13633535	13633485	7.93e-17	87.9
Bn-A01-p15468033	A01	1	100	50	0	0	1	50	13640781	13640830	1.7e-18	93.5
Bn-A01-p15446864	A01	1	100	48	0	0	3	50	13662814	13662861	2.2e-17	89.8
Bn-A01-p15441407	A01	1	100	50	0	0	1	50	13669903	13669854	1.7e-18	93.5
Bn-A01-p15413589	A01	1	100	50	0	0	1	50	13707571	13707522	1.7e-18	93.5
Bn-A01-p15408721	A01	1	100	50	0	0	1	50	13712373	13712422	1.7e-18	93.5
Bn-A01-p15407905	A01	1	100	50	0	0	1	50	13713289	13713240	1.7e-18	93.5
Bn-A05-p7662456	A01	1	100	50	0	0	1	50	13853652	13853701	1.7e-18	93.5
Bn-A01-p15193510	A01	1	100	50	0	0	1	50	13905898	13905849	1.7e-18	93.5
Bn-A01-p15182302	A01	1	100	50	0	0	1	50	13917031	13917080	1.7e-18	93.5
Bn-A01-p15130843	A01	1	100	50	0	0	1	50	13969189	13969140	1.7e-18	93.5
Bn-A01-p15114417	A01	1	100	50	0	0	1	50	13987529	13987578	1.7e-18	93.5
Bn-A01-p15095524	A01	1	100	50	0	0	1	50	14006660	14006709	1.7e-18	93.5
Bn-A01-p15095314	A01	1	100	50	0	0	1	50	14006836	14006885	1.7e-18	93.5
Bn-A01-p15095213	A01	1	100	50	0	0	1	50	14007037	14006988	1.7e-18	93.5
Bn-A01-p15092778	A01	1	100	50	0	0	1	50	14009375	14009424	1.7e-18	93.5
Bn-A01-p15090383	A01	1	100	50	0	0	1	50	14011772	14011821	1.7e-18	93.5
Bn-A01-p15087171	A01	1	100	50	0	0	1	50	14015079	14015030	1.7e-18	93.5
Bn-A01-p15087045	A01	1	100	50	0	0	1	50	14015105	14015154	1.7e-18	93.5
Bn-A01-p15000468	A01	1	98	50	0	1	1	50	14119926	14119878	2.85e-16	86.1
Bn-A01-p14965596	A01	1	100	50	0	0	1	50	14139031	14139080	1.7e-18	93.5
Bn-A01-p14959478	A01	1	100	50	0	0	1	50	14150823	14150774	1.7e-18	93.5
Bn-A01-p14955594	A01	1	100	50	0	0	1	50	14155029	14155078	1.7e-18	93.5
Bn-A01-p14949256	A01	1	100	50	0	0	1	50	14159056	14159105	1.7e-18	93.5
Bn-A01-p14949121	A01	1	100	50	0	0	1	50	14159291	14159242	1.7e-18	93.5
Bn-A01-p14949030	A01	1	100	50	0	0	1	50	14159382	14159333	1.7e-18	93.5
Bn-A01-p14948748	A01	1	100	50	0	0	1	50	14159564	14159613	1.7e-18	93.5
Bn-A01-p14948614	A01	1	100	50	0	0	1	50	14159698	14159747	1.7e-18	93.5
Bn-A01-p14948379	A01	1	100	50	0	0	1	50	14160033	14159984	1.7e-18	93.5
Bn-A01-p14948237	A01	1	100	50	0	0	1	50	14160075	14160124	1.7e-18	93.5
Bn-A01-p14947418	A01	1	100	50	0	0	1	50	14160897	14160946	1.7e-18	93.5
Bn-A01-p14947053	A01	1	100	50	0	0	1	50	14161262	14161311	1.7e-18	93.5
Bn-A01-p14943499	A01	1	100	50	0	0	1	50	14164809	14164858	1.7e-18	93.5
Bn-A01-p14934844	A01	1	100	50	0	0	1	50	14181884	14181835	1.7e-18	93.5
Bn-A01-p14906494	A01	1	100	50	0	0	1	50	14237330	14237379	1.7e-18	93.5
Bn-A01-p14905298	A01	1	100	50	0	0	1	50	14238872	14238823	1.7e-18	93.5
Bn-A01-p14859839	A01	1	100	50	0	0	1	50	14283492	14283443	1.7e-18	93.5
Bn-A01-p14727717	A01	1	100	50	0	0	1	50	14388971	14389020	1.7e-18	93.5
Bn-A01-p14723306	A01	1	100	50	0	0	1	50	14393464	14393415	1.7e-18	93.5
Bn-A01-p14419363	A01	1	100	50	0	0	1	50	14521773	14521724	1.7e-18	93.5
Bn-A01-p14661148	A01	1	100	50	0	0	1	50	14742988	14742939	1.7e-18	93.5
Bn-scaff_16361_1-p300265	A01	1	100	50	0	0	1	50	14868012	14867963	1.7e-18	93.5
Bn-scaff_16361_1-p300435	A01	1	100	50	0	0	1	50	14868089	14868138	1.7e-18	93.5
Bn-A01-p14241215	A01	1	100	50	0	0	1	50	14876093	14876142	1.7e-18	93.5
Bn-A01-p14238948	A01	1	100	50	0	0	1	50	14883020	14882971	1.7e-18	93.5
Bn-A01-p14232473	A01	1	100	50	0	0	1	50	14926037	14925988	1.7e-18	93.5
Bn-A01-p14223709	A01	1	100	50	0	0	1	50	14930863	14930814	1.7e-18	93.5
Bn-A01-p14210994	A01	1	100	50	0	0	1	50	14937239	14937190	1.7e-18	93.5
Bn-A01-p14201581	A01	1	100	50	0	0	1	50	14947980	14947931	1.7e-18	93.5
Bn-A01-p14200787	A01	1	100	50	0	0	1	50	14948674	14948723	1.7e-18	93.5
Bn-A01-p14200714	A01	1	100	50	0	0	1	50	14948847	14948798	1.7e-18	93.5
Bn-A01-p14191393	A01	1	100	50	0	0	1	50	14957496	14957447	1.7e-18	93.5
Bn-A01-p14181829	A01	1	100	50	0	0	1	50	14980122	14980073	1.7e-18	93.5
Bn-A01-p14181651	A01	1	100	50	0	0	1	50	14980203	14980252	1.7e-18	93.5
Bn-A01-p14181463	A01	1	100	50	0	0	1	50	14980391	14980440	1.7e-18	93.5
Bn-A01-p14169412	A01	1	100	50	0	0	1	50	14984717	14984668	1.7e-18	93.5
Bn-A01-p14168802	A01	1	100	50	0	0	1	50	14985225	14985274	1.7e-18	93.5
Bn-A01-p14167866	A01	1	100	50	0	0	1	50	14988167	14988118	1.7e-18	93.5
Bn-A01-p14148071	A01	1	100	50	0	0	1	50	15002173	15002222	1.7e-18	93.5
Bn-A01-p14138072	A01	1	100	50	0	0	1	50	15012714	15012665	1.7e-18	93.5
Bn-A01-p14128129	A01	1	100	50	0	0	1	50	15018345	15018296	1.7e-18	93.5
Bn-A01-p14102222	A01	1	100	50	0	0	1	50	15048050	15048099	1.7e-18	93.5
Bn-A01-p14079006	A01	1	100	50	0	0	1	50	15089587	15089636	1.7e-18	93.5
Bn-A01-p14076641	A01	1	100	50	0	0	1	50	15091997	15092046	1.7e-18	93.5
Bn-A01-p14074391	A01	1	100	50	0	0	1	50	15094249	15094298	1.7e-18	93.5
Bn-A01-p14074268	A01	1	100	50	0	0	1	50	15094472	15094423	1.7e-18	93.5
Bn-A01-p14074100	A01	1	100	50	0	0	1	50	15094642	15094593	1.7e-18	93.5
Bn-A01-p14071179	A01	1	100	50	0	0	1	50	15097455	15097504	1.7e-18	93.5
Bn-A01-p14071237	A01	1	100	50	0	0	1	50	15097497	15097448	1.7e-18	93.5
Bn-A01-p14057073	A01	1	100	50	0	0	1	50	15103879	15103830	1.7e-18	93.5
Bn-A01-p14022855	A01	1	96.154	52	0	1	1	50	15144860	15144809	1.03e-15	84.2
Bn-A01-p13775817	A01	1	100	50	0	0	1	50	15473355	15473306	1.7e-18	93.5
Bn-A01-p13239976	A01	1	100	50	0	0	1	50	16002478	16002429	1.7e-18	93.5
Bn-scaff_24145_1-p185075	A01	1	100	50	0	0	1	50	17015632	17015583	1.7e-18	93.5
Bn-A01-p25750911	A01	1	100	50	0	0	1	50	17042421	17042470	1.7e-18	93.5
Bn-A01-p26010353	A01	1	100	50	0	0	1	50	17923046	17922997	1.7e-18	93.5
Bn-A01-p15957543	A01	1	100	50	0	0	1	50	19291583	19291534	1.7e-18	93.5
Bn-A01-p16086381	A01	1	98	50	0	1	1	50	19446591	19446639	2.85e-16	86.1
Bn-A01-p16088721	A01	1	100	50	0	0	1	50	19449034	19448985	1.7e-18	93.5
Bn-A01-p16093558	A01	1	100	50	0	0	1	50	19453490	19453441	1.7e-18	93.5
Bn-A01-p16094037	A01	1	100	50	0	0	1	50	19453834	19453883	1.7e-18	93.5
Bn-A05-p3428986	A01	1	100	50	0	0	1	50	19458026	19457977	1.7e-18	93.5
Bn-A01-p16103425	A01	1	100	50	0	0	1	50	19459281	19459330	1.7e-18	93.5
Bn-A01-p16111263	A01	1	100	50	0	0	1	50	19461660	19461709	1.7e-18	93.5
Bn-A01-p16121664	A01	1	100	50	0	0	1	50	19467552	19467503	1.7e-18	93.5
Bn-A01-p16122923	A01	1	100	50	0	0	1	50	19468812	19468763	1.7e-18	93.5
Bn-A01-p16123649	A01	1	100	50	0	0	1	50	19469438	19469487	1.7e-18	93.5
Bn-A01-p16127871	A01	1	100	50	0	0	1	50	19473885	19473934	1.7e-18	93.5
Bn-A01-p16128165	A01	1	100	50	0	0	1	50	19474179	19474228	1.7e-18	93.5
Bn-A01-p16128458	A01	1	100	50	0	0	1	50	19474472	19474521	1.7e-18	93.5
Bn-A01-p16134540	A01	1	100	50	0	0	1	50	19484504	19484455	1.7e-18	93.5
Bn-A01-p16134838	A01	1	100	50	0	0	1	50	19484693	19484742	1.7e-18	93.5
Bn-A01-p16135094	A01	1	100	50	0	0	1	50	19485049	19485000	1.7e-18	93.5
Bn-A01-p16135537	A01	1	100	50	0	0	1	50	19485392	19485441	1.7e-18	93.5
Bn-A01-p16142196	A01	1	100	50	0	0	1	50	19493440	19493391	1.7e-18	93.5
Bn-A01-p16173770	A01	1	100	50	0	0	1	50	19566374	19566325	1.7e-18	93.5
Bn-A01-p16174042	A01	1	100	50	0	0	1	50	19566646	19566597	1.7e-18	93.5
Bn-A01-p16200217	A01	1	100	50	0	0	1	50	19600411	19600460	1.7e-18	93.5
Bn-A01-p16217917	A01	1	100	46	0	0	5	50	19617276	19617321	2.85e-16	86.1
Bn-A01-p16221475	A01	1	100	50	0	0	1	50	19619895	19619846	1.7e-18	93.5
Bn-A01-p16221732	A01	1	100	50	0	0	1	50	19620054	19620103	1.7e-18	93.5
Bn-A01-p16222086	A01	1	100	50	0	0	1	50	19620409	19620458	1.7e-18	93.5
Bn-A01-p16222167	A01	1	100	50	0	0	1	50	19620489	19620538	1.7e-18	93.5
Bn-A01-p16222098	A01	1	98	50	0	1	1	50	19620520	19620472	2.85e-16	86.1
Bn-A01-p16222479	A01	1	100	49	0	0	1	49	19620903	19620855	6.13e-18	91.6
Bn-A01-p16229096	A01	1	100	50	0	0	1	50	19627778	19627827	1.7e-18	93.5
Bn-A01-p16276961	A01	1	100	50	0	0	1	50	19648915	19648866	1.7e-18	93.5
Bn-A01-p16303134	A01	1	100	50	0	0	1	50	19703555	19703604	1.7e-18	93.5
Bn-A01-p16324010	A01	1	100	50	0	0	1	50	19717216	19717167	1.7e-18	93.5
Bn-A01-p16331424	A01	1	100	50	0	0	1	50	19723232	19723281	1.7e-18	93.5
Bn-A01-p16343556	A01	1	100	50	0	0	1	50	19733388	19733437	1.7e-18	93.5
Bn-A01-p16358989	A01	1	100	50	0	0	1	50	19748028	19748077	1.7e-18	93.5
Bn-A01-p16374068	A01	1	100	50	0	0	1	50	19774185	19774234	1.7e-18	93.5
Bn-A01-p16380496	A01	1	100	50	0	0	1	50	19798213	19798262	1.7e-18	93.5
Bn-A01-p16389291	A01	1	100	50	0	0	1	50	19807055	19807006	1.7e-18	93.5
Bn-A01-p16393582	A01	1	100	50	0	0	1	50	19811377	19811328	1.7e-18	93.5
Bn-A01-p16393939	A01	1	100	50	0	0	1	50	19811634	19811683	1.7e-18	93.5
Bn-A01-p16394111	A01	1	100	50	0	0	1	50	19811908	19811859	1.7e-18	93.5
Bn-A01-p16396926	A01	1	100	50	0	0	1	50	19814764	19814715	1.7e-18	93.5
Bn-A01-p16403023	A01	1	100	50	0	0	1	50	19845443	19845394	1.7e-18	93.5
Bn-A01-p16418499	A01	1	100	50	0	0	1	50	19859695	19859646	1.7e-18	93.5
Bn-A01-p16432946	A01	1	100	50	0	0	1	50	19873763	19873714	1.7e-18	93.5
Bn-A01-p16454615	A01	1	100	50	0	0	1	50	19905737	19905786	1.7e-18	93.5
Bn-A01-p16461639	A01	1	100	50	0	0	1	50	19912794	19912843	1.7e-18	93.5
Bn-A01-p16461540	A01	1	100	50	0	0	1	50	19912795	19912746	1.7e-18	93.5
Bn-A01-p16529313	A01	1	98.039	51	0	1	1	50	19959989	19960039	7.93e-17	87.9
Bn-A01-p16537769	A01	1	100	48	0	0	3	50	19968626	19968673	2.2e-17	89.8
Bn-A01-p16537866	A01	1	100	50	0	0	1	50	19968723	19968772	1.7e-18	93.5
Bn-A01-p16537792	A01	1	100	50	0	0	1	50	19968749	19968700	1.7e-18	93.5
Bn-A01-p16538323	A01	1	100	50	0	0	1	50	19969280	19969231	1.7e-18	93.5
Bn-A01-p16538587	A01	1	100	50	0	0	1	50	19969544	19969495	1.7e-18	93.5
Bn-A01-p16539250	A01	1	100	50	0	0	1	50	19970207	19970158	1.7e-18	93.5
Bn-A01-p16557636	A01	1	100	50	0	0	1	50	19984959	19985008	1.7e-18	93.5
Bn-A01-p16577721	A01	1	100	50	0	0	1	50	20008050	20008001	1.7e-18	93.5
Bn-A01-p16597123	A01	1	100	50	0	0	1	50	20026185	20026234	1.7e-18	93.5
Bn-A01-p16598652	A01	1	100	50	0	0	1	50	20028939	20028988	1.7e-18	93.5
Bn-A01-p16646241	A01	1	100	50	0	0	1	50	20040494	20040445	1.7e-18	93.5
Bn-A01-p16662544	A01	1	100	50	0	0	1	50	20056875	20056826	1.7e-18	93.5
Bn-A01-p16665014	A01	1	100	50	0	0	1	50	20058698	20058747	1.7e-18	93.5
Bn-A01-p16665036	A01	1	100	50	0	0	1	50	20058820	20058771	1.7e-18	93.5
Bn-Scaffold000582-p3247	A01	1	100	50	0	0	1	50	20081578	20081627	1.7e-18	93.5
Bn-A01-p16692819	A01	1	100	50	0	0	1	50	20090880	20090831	1.7e-18	93.5
Bn-A01-p16692959	A01	1	100	50	0	0	1	50	20090920	20090969	1.7e-18	93.5
Bn-A01-p16694394	A01	1	100	50	0	0	1	50	20092387	20092436	1.7e-18	93.5
Bn-A01-p16705936	A01	1	100	50	0	0	1	50	20105796	20105747	1.7e-18	93.5
Bn-A01-p16711121	A01	1	100	50	0	0	1	50	20111818	20111867	1.7e-18	93.5
Bn-A01-p16720365	A01	1	100	50	0	0	1	50	20121451	20121402	1.7e-18	93.5
Bn-A01-p16829363	A01	1	100	50	0	0	1	50	20211220	20211269	1.7e-18	93.5
Bn-A01-p16847535	A01	1	100	50	0	0	1	50	20229016	20228967	1.7e-18	93.5
Bn-A01-p16857466	A01	1	100	49	0	0	1	49	20238859	20238811	6.13e-18	91.6
Bn-A01-p16869474	A01	1	100	50	0	0	1	50	20248013	20248062	1.7e-18	93.5
Bn-A01-p16911720	A01	1	100	50	0	0	1	50	20302438	20302487	1.7e-18	93.5
Bn-Scaffold000508-p6116	A01	1	100	50	0	0	1	50	20325084	20325133	1.7e-18	93.5
Bn-A01-p16926592	A01	1	100	50	0	0	1	50	20343362	20343313	1.7e-18	93.5
Bn-A01-p16935031	A01	1	100	50	0	0	1	50	20352562	20352611	1.7e-18	93.5
Bn-A01-p16943370	A01	1	100	50	0	0	1	50	20360996	20360947	1.7e-18	93.5
Bn-A01-p16951655	A01	1	100	50	0	0	1	50	20369411	20369362	1.7e-18	93.5
Bn-A01-p17040457	A01	1	100	50	0	0	1	50	20492339	20492388	1.7e-18	93.5
Bn-A01-p17049439	A01	1	100	50	0	0	1	50	20504725	20504774	1.7e-18	93.5
Bn-A01-p17050461	A01	1	100	50	0	0	1	50	20505817	20505768	1.7e-18	93.5
Bn-A01-p17081120	A01	1	100	50	0	0	1	50	20569960	20570009	1.7e-18	93.5
Bn-A01-p17097891	A01	1	100	50	0	0	1	50	20589751	20589702	1.7e-18	93.5
Bn-A01-p17104282	A01	1	100	50	0	0	1	50	20596265	20596216	1.7e-18	93.5
Bn-A01-p17105194	A01	1	100	50	0	0	1	50	20597097	20597048	1.7e-18	93.5
Bn-A01-p17105372	A01	1	100	50	0	0	1	50	20597175	20597224	1.7e-18	93.5
Bn-A01-p17105672	A01	1	100	50	0	0	1	50	20597475	20597524	1.7e-18	93.5
Bn-A01-p17106985	A01	1	100	50	0	0	1	50	20606606	20606557	1.7e-18	93.5
Bn-A01-p17110860	A01	1	100	50	0	0	1	50	20610384	20610433	1.7e-18	93.5
Bn-A01-p17118647	A01	1	100	50	0	0	1	50	20618271	20618222	1.7e-18	93.5
Bn-A01-p17118839	A01	1	100	50	0	0	1	50	20618363	20618412	1.7e-18	93.5
Bn-A01-p17119024	A01	1	100	50	0	0	1	50	20618548	20618597	1.7e-18	93.5
Bn-A01-p17119126	A01	1	100	50	0	0	1	50	20618750	20618701	1.7e-18	93.5
Bn-A01-p17121291	A01	1	100	50	0	0	1	50	20620934	20620885	1.7e-18	93.5
Bn-A01-p17121775	A01	1	100	50	0	0	1	50	20621418	20621369	1.7e-18	93.5
Bn-A01-p17124558	A01	1	100	50	0	0	1	50	20624201	20624152	1.7e-18	93.5
Bn-A01-p17124831	A01	1	100	50	0	0	1	50	20624374	20624423	1.7e-18	93.5
Bn-A01-p17136539	A01	1	100	50	0	0	1	50	20636346	20636297	1.7e-18	93.5
Bn-A01-p17137863	A01	1	100	50	0	0	1	50	20637570	20637619	1.7e-18	93.5
Bn-A01-p17150604	A01	1	100	50	0	0	1	50	20648513	20648562	1.7e-18	93.5
Bn-A01-p17150875	A01	1	100	50	0	0	1	50	20648884	20648835	1.7e-18	93.5
Bn-A01-p17156534	A01	1	100	50	0	0	1	50	20654334	20654383	1.7e-18	93.5
Bn-A01-p17157752	A01	1	100	50	0	0	1	50	20655654	20655605	1.7e-18	93.5
Bn-A01-p17159109	A01	1	100	50	0	0	1	50	20657029	20656980	1.7e-18	93.5
Bn-A01-p17160355	A01	1	100	50	0	0	1	50	20661822	20661773	1.7e-18	93.5
Bn-A01-p17165052	A01	1	100	50	0	0	1	50	20666335	20666384	1.7e-18	93.5
Bn-A01-p17165303	A01	1	100	50	0	0	1	50	20666693	20666644	1.7e-18	93.5
Bn-A01-p17174111	A01	1	100	50	0	0	1	50	20675390	20675341	1.7e-18	93.5
Bn-A01-p17187327	A01	1	100	50	0	0	1	50	20688551	20688600	1.7e-18	93.5
Bn-A01-p17216237	A01	1	100	50	0	0	1	50	20731950	20731999	1.7e-18	93.5
Bn-A01-p17278340	A01	1	100	50	0	0	1	50	20809006	20808957	1.7e-18	93.5
Bn-A01-p17283208	A01	1	100	50	0	0	1	50	20814614	20814565	1.7e-18	93.5
Bn-A01-p17294955	A01	1	100	50	0	0	1	50	20826567	20826616	1.7e-18	93.5
Bn-A01-p17295156	A01	1	100	50	0	0	1	50	20826767	20826816	1.7e-18	93.5
Bn-A01-p17428120	A01	1	100	50	0	0	1	50	21016406	21016455	1.7e-18	93.5
Bn-A01-p17432814	A01	1	98	50	0	1	1	50	21021271	21021223	2.85e-16	86.1
Bn-A01-p17437603	A01	1	100	50	0	0	1	50	21025808	21025759	1.7e-18	93.5
Bn-A01-p17438645	A01	1	100	50	0	0	1	50	21026851	21026802	1.7e-18	93.5
Bn-A01-p17445392	A01	1	100	50	0	0	1	50	21034802	21034753	1.7e-18	93.5
Bn-A01-p17480096	A01	1	100	50	0	0	1	50	21066790	21066839	1.7e-18	93.5
Bn-A01-p17481703	A01	1	100	50	0	0	1	50	21069041	21068992	1.7e-18	93.5
Bn-A01-p17481804	A01	1	100	50	0	0	1	50	21069142	21069093	1.7e-18	93.5
Bn-A01-p17482037	A01	1	100	50	0	0	1	50	21069375	21069326	1.7e-18	93.5
Bn-A01-p17483006	A01	1	100	50	0	0	1	50	21070223	21070272	1.7e-18	93.5
Bn-A01-p17494364	A01	1	100	50	0	0	1	50	21082752	21082703	1.7e-18	93.5
Bn-A01-p17498057	A01	1	100	50	0	0	1	50	21086288	21086337	1.7e-18	93.5
Bn-A01-p17518104	A01	1	100	50	0	0	1	50	21094593	21094544	1.7e-18	93.5
Bn-A01-p17518305	A01	1	100	50	0	0	1	50	21094802	21094753	1.7e-18	93.5
Bn-A01-p17518468	A01	1	100	50	0	0	1	50	21094965	21094916	1.7e-18	93.5
Bn-A01-p17548227	A01	1	100	50	0	0	1	50	21109156	21109107	1.7e-18	93.5
Bn-A01-p17553462	A01	1	100	50	0	0	1	50	21114389	21114340	1.7e-18	93.5
Bn-A01-p17555906	A01	1	100	50	0	0	1	50	21116721	21116770	1.7e-18	93.5
Bn-A01-p17565834	A01	1	100	50	0	0	1	50	21151305	21151354	1.7e-18	93.5
Bn-A01-p17574483	A01	1	100	50	0	0	1	50	21153231	21153280	1.7e-18	93.5
Bn-A01-p17577426	A01	1	100	50	0	0	1	50	21155937	21155888	1.7e-18	93.5
Bn-A01-p17577903	A01	1	100	50	0	0	1	50	21156314	21156363	1.7e-18	93.5
Bn-A01-p17625721	A01	1	100	50	0	0	1	50	21263375	21263326	1.7e-18	93.5
Bn-A01-p17626052	A01	1	100	50	0	0	1	50	21263606	21263655	1.7e-18	93.5
Bn-A01-p17629628	A01	1	100	50	0	0	1	50	21267180	21267229	1.7e-18	93.5
Bn-A01-p17649002	A01	1	100	50	0	0	1	50	21283720	21283769	1.7e-18	93.5
Bn-A01-p17691799	A01	1	100	50	0	0	1	50	21330965	21330916	1.7e-18	93.5
Bn-A01-p17693439	A01	1	100	50	0	0	1	50	21332606	21332557	1.7e-18	93.5
Bn-A01-p17714021	A01	1	100	50	0	0	1	50	21351721	21351770	1.7e-18	93.5
Bn-A01-p17716773	A01	1	100	50	0	0	1	50	21364377	21364426	1.7e-18	93.5
Bn-A01-p17717864	A01	1	100	50	0	0	1	50	21365568	21365519	1.7e-18	93.5
Bn-A01-p17728772	A01	1	100	50	0	0	1	50	21376332	21376381	1.7e-18	93.5
Bn-A01-p17730468	A01	1	100	50	0	0	1	50	21378177	21378128	1.7e-18	93.5
Bn-A01-p17755236	A01	1	100	50	0	0	1	50	21401110	21401159	1.7e-18	93.5
Bn-A01-p17769742	A01	1	100	50	0	0	1	50	21406072	21406121	1.7e-18	93.5
Bn-A01-p17771411	A01	1	100	50	0	0	1	50	21407747	21407796	1.7e-18	93.5
Bn-A01-p17783808	A01	1	100	50	0	0	1	50	21423347	21423396	1.7e-18	93.5
Bn-A01-p17783900	A01	1	100	50	0	0	1	50	21423439	21423488	1.7e-18	93.5
Bn-A01-p17787446	A01	1	100	50	0	0	1	50	21427089	21427040	1.7e-18	93.5
Bn-A01-p17806607	A01	1	98.039	51	0	1	1	50	21434319	21434369	7.93e-17	87.9
Bn-A01-p17820874	A01	1	100	50	0	0	1	50	21468338	21468289	1.7e-18	93.5
Bn-A01-p17839637	A01	1	100	50	0	0	1	50	21487260	21487309	1.7e-18	93.5
Bn-A01-p17849675	A01	1	100	50	0	0	1	50	21497660	21497611	1.7e-18	93.5
Bn-A01-p17885385	A01	1	100	50	0	0	1	50	21543431	21543382	1.7e-18	93.5
Bn-A01-p17885812	A01	1	100	50	0	0	1	50	21543858	21543809	1.7e-18	93.5
Bn-A01-p17886123	A01	1	100	50	0	0	1	50	21544169	21544120	1.7e-18	93.5
Bn-A01-p17886595	A01	1	100	50	0	0	1	50	21544641	21544592	1.7e-18	93.5
Bn-A01-p17887214	A01	1	100	50	0	0	1	50	21545160	21545209	1.7e-18	93.5
Bn-A01-p17887135	A01	1	100	50	0	0	1	50	21545181	21545132	1.7e-18	93.5
Bn-A01-p17887935	A01	1	100	50	0	0	1	50	21545981	21545932	1.7e-18	93.5
Bn-A01-p17888905	A01	1	100	50	0	0	1	50	21546953	21546904	1.7e-18	93.5
Bn-A01-p17905950	A01	1	100	50	0	0	1	50	21618282	21618331	1.7e-18	93.5
Bn-A01-p17906322	A01	1	100	50	0	0	1	50	21619012	21618963	1.7e-18	93.5
Bn-A01-p17906399	A01	1	100	50	0	0	1	50	21619089	21619040	1.7e-18	93.5
Bn-A01-p17906765	A01	1	100	50	0	0	1	50	21619357	21619406	1.7e-18	93.5
Bn-A01-p17907059	A01	1	100	50	0	0	1	50	21619651	21619700	1.7e-18	93.5
Bn-A01-p17907563	A01	1	100	50	0	0	1	50	21620155	21620204	1.7e-18	93.5
Bn-A01-p17910798	A01	1	100	50	0	0	1	50	21632497	21632448	1.7e-18	93.5
Bn-A01-p17916004	A01	1	100	50	0	0	1	50	21646853	21646804	1.7e-18	93.5
Bn-A01-p17930058	A01	1	100	50	0	0	1	50	21650073	21650122	1.7e-18	93.5
Bn-A01-p17935219	A01	1	100	50	0	0	1	50	21657840	21657889	1.7e-18	93.5
Bn-A01-p17941441	A01	1	100	50	0	0	1	50	21664026	21663977	1.7e-18	93.5
Bn-A01-p17997441	A01	1	100	50	0	0	1	50	21735760	21735809	1.7e-18	93.5
Bn-A01-p17998573	A01	1	100	50	0	0	1	50	21736984	21736935	1.7e-18	93.5
Bn-A01-p18008659	A01	1	100	50	0	0	1	50	21741764	21741715	1.7e-18	93.5
Bn-A01-p18015006	A01	1	100	50	0	0	1	50	21744786	21744835	1.7e-18	93.5
Bn-A01-p18014946	A01	1	100	50	0	0	1	50	21744826	21744777	1.7e-18	93.5
Bn-A01-p18015162	A01	1	100	50	0	0	1	50	21745039	21744990	1.7e-18	93.5
Bn-A01-p18019641	A01	1	100	50	0	0	1	50	21749160	21749111	1.7e-18	93.5
Bn-A01-p18020314	A01	1	100	50	0	0	1	50	21749734	21749783	1.7e-18	93.5
Bn-A01-p18020258	A01	1	100	50	0	0	1	50	21749778	21749729	1.7e-18	93.5
Bn-A01-p18020503	A01	1	100	50	0	0	1	50	21750017	21749968	1.7e-18	93.5
Bn-A01-p18023959	A01	1	100	50	0	0	1	50	21752687	21752736	1.7e-18	93.5
Bn-A01-p18025988	A01	1	100	50	0	0	1	50	21754519	21754470	1.7e-18	93.5
Bn-A01-p18027200	A01	1	100	50	0	0	1	50	21755605	21755654	1.7e-18	93.5
Bn-A01-p18027307	A01	1	100	50	0	0	1	50	21755714	21755763	1.7e-18	93.5
Bn-A01-p18027398	A01	1	100	50	0	0	1	50	21755805	21755854	1.7e-18	93.5
Bn-A01-p18028380	A01	1	100	50	0	0	1	50	21756806	21756855	1.7e-18	93.5
Bn-A01-p18028483	A01	1	100	50	0	0	1	50	21756909	21756958	1.7e-18	93.5
Bn-A01-p18030126	A01	1	100	50	0	0	1	50	21758070	21758119	1.7e-18	93.5
Bn-A01-p18032386	A01	1	100	50	0	0	1	50	21761053	21761004	1.7e-18	93.5
Bn-A01-p18072231	A01	1	100	50	0	0	1	50	21784181	21784230	1.7e-18	93.5
Bn-A01-p18091225	A01	1	100	50	0	0	1	50	21808316	21808267	1.7e-18	93.5
Bn-A01-p18091559	A01	1	100	50	0	0	1	50	21808650	21808601	1.7e-18	93.5
Bn-A01-p18091996	A01	1	100	50	0	0	1	50	21808987	21809036	1.7e-18	93.5
Bn-A01-p18091997	A01	1	100	50	0	0	1	50	21809088	21809039	1.7e-18	93.5
Bn-A01-p18100900	A01	1	100	50	0	0	1	50	21821546	21821497	1.7e-18	93.5
Bn-A01-p18102632	A01	1	100	50	0	0	1	50	21822929	21822978	1.7e-18	93.5
Bn-A01-p18102711	A01	1	100	50	0	0	1	50	21823108	21823059	1.7e-18	93.5
Bn-A01-p18121827	A01	1	100	50	0	0	1	50	21832118	21832167	1.7e-18	93.5
Bn-A01-p18160311	A01	1	100	50	0	0	1	50	21855583	21855632	1.7e-18	93.5
Bn-A01-p18205455	A01	1	100	50	0	0	1	50	21903947	21903898	1.7e-18	93.5
Bn-A01-p18218629	A01	1	100	50	0	0	1	50	21917995	21917946	1.7e-18	93.5
Bn-A01-p18240444	A01	1	100	50	0	0	1	50	21938924	21938875	1.7e-18	93.5
Bn-A01-p18260283	A01	1	100	50	0	0	1	50	21958602	21958651	1.7e-18	93.5
Bn-A01-p18266537	A01	1	100	50	0	0	1	50	21964852	21964901	1.7e-18	93.5
Bn-A01-p18285077	A01	1	100	50	0	0	1	50	21988197	21988148	1.7e-18	93.5
Bn-A01-p18306617	A01	1	100	50	0	0	1	50	22014892	22014941	1.7e-18	93.5
Bn-A01-p18329609	A01	1	100	50	0	0	1	50	22045373	22045422	1.7e-18	93.5
Bn-A01-p18329689	A01	1	100	50	0	0	1	50	22045553	22045504	1.7e-18	93.5
Bn-A01-p18329796	A01	1	100	50	0	0	1	50	22045660	22045611	1.7e-18	93.5
Bn-A01-p18330598	A01	1	100	50	0	0	1	50	22046362	22046411	1.7e-18	93.5
Bn-A01-p18367467	A01	1	100	50	0	0	1	50	22078425	22078474	1.7e-18	93.5
Bn-A05-p23465599	A01	1	100	50	0	0	1	50	22284418	22284467	1.7e-18	93.5
Bn-A05-p23466337	A01	1	100	50	0	0	1	50	22285155	22285204	1.7e-18	93.5
Bn-A01-p19340658	A01	1	100	50	0	0	1	50	22383749	22383798	1.7e-18	93.5
Bn-A01-p19446599	A01	1	100	50	0	0	1	50	22496442	22496393	1.7e-18	93.5
Bn-A01-p19449612	A01	1	100	50	0	0	1	50	22499366	22499415	1.7e-18	93.5
Bn-A01-p19527588	A01	1	100	50	0	0	1	50	22603010	22603059	1.7e-18	93.5
Bn-A01-p19528388	A01	1	100	50	0	0	1	50	22603915	22603866	1.7e-18	93.5
Bn-A01-p19562202	A01	1	100	50	0	0	1	50	22622763	22622714	1.7e-18	93.5
Bn-A01-p19564015	A01	1	98	50	0	1	1	50	22623060	22623108	2.85e-16	86.1
Bn-A01-p19567680	A01	1	100	50	0	0	1	50	22627738	22627689	1.7e-18	93.5
Bn-A01-p19577901	A01	1	100	46	0	0	5	50	22631100	22631055	2.85e-16	86.1
Bn-A01-p19579243	A01	1	100	50	0	0	1	50	22632514	22632465	1.7e-18	93.5
Bn-A01-p19579412	A01	1	100	50	0	0	1	50	22632683	22632634	1.7e-18	93.5
Bn-A01-p19581862	A01	1	100	50	0	0	1	50	22633193	22633242	1.7e-18	93.5
Bn-A01-p19582940	A01	1	100	50	0	0	1	50	22634283	22634234	1.7e-18	93.5
Bn-A01-p19583367	A01	1	100	50	0	0	1	50	22634715	22634666	1.7e-18	93.5
Bn-A01-p19589921	A01	1	100	50	0	0	1	50	22640512	22640463	1.7e-18	93.5
Bn-A01-p19592804	A01	1	100	50	0	0	1	50	22643384	22643335	1.7e-18	93.5
Bn-A01-p19593638	A01	1	100	49	0	0	1	49	22644119	22644167	6.13e-18	91.6
Bn-A01-p19593702	A01	1	100	50	0	0	1	50	22644282	22644233	1.7e-18	93.5
Bn-A01-p19594423	A01	1	100	50	0	0	1	50	22644905	22644954	1.7e-18	93.5
Bn-A01-p19598162	A01	1	100	50	0	0	1	50	22648687	22648736	1.7e-18	93.5
Bn-A01-p19599270	A01	1	100	50	0	0	1	50	22649796	22649845	1.7e-18	93.5
Bn-A01-p19600244	A01	1	100	50	0	0	1	50	22650871	22650822	1.7e-18	93.5
Bn-A01-p19601137	A01	1	100	50	0	0	1	50	22651689	22651738	1.7e-18	93.5
Bn-A01-p19601542	A01	1	100	50	0	0	1	50	22652097	22652146	1.7e-18	93.5
Bn-A01-p19602112	A01	1	100	50	0	0	1	50	22652759	22652710	1.7e-18	93.5
Bn-A01-p19607256	A01	1	100	50	0	0	1	50	22658470	22658421	1.7e-18	93.5
Bn-A01-p19617963	A01	1	100	50	0	0	1	50	22664938	22664889	1.7e-18	93.5
Bn-A01-p19623880	A01	1	100	50	0	0	1	50	22669774	22669823	1.7e-18	93.5
Bn-A01-p19623985	A01	1	100	50	0	0	1	50	22669879	22669928	1.7e-18	93.5
Bn-A01-p19624123	A01	1	100	50	0	0	1	50	22670017	22670066	1.7e-18	93.5
Bn-A01-p19624216	A01	1	100	50	0	0	1	50	22670110	22670159	1.7e-18	93.5
Bn-A01-p19650666	A01	1	100	50	0	0	1	50	22680800	22680849	1.7e-18	93.5
Bn-A01-p19700004	A01	1	100	50	0	0	1	50	22720635	22720684	1.7e-18	93.5
Bn-A01-p19712396	A01	1	100	48	0	0	1	48	22727950	22727997	2.2e-17	89.8
Bn-A01-p19722138	A01	1	100	50	0	0	1	50	22731600	22731551	1.7e-18	93.5
Bn-A01-p19731678	A01	1	100	50	0	0	1	50	22738306	22738257	1.7e-18	93.5
Bn-A01-p19762477	A01	1	100	50	0	0	1	50	22767367	22767416	1.7e-18	93.5
Bn-A01-p19803988	A01	1	100	50	0	0	1	50	22796438	22796487	1.7e-18	93.5
Bn-A01-p19840597	A01	1	100	50	0	0	1	50	22849277	22849326	1.7e-18	93.5
Bn-A01-p19858735	A01	1	100	50	0	0	1	50	22854838	22854789	1.7e-18	93.5
Bn-A01-p19879925	A01	1	100	50	0	0	1	50	22873476	22873525	1.7e-18	93.5
Bn-A01-p19929280	A01	1	100	50	0	0	1	50	22935917	22935868	1.7e-18	93.5
Bn-A01-p19931030	A01	1	100	50	0	0	1	50	22938193	22938242	1.7e-18	93.5
Bn-A01-p19931596	A01	1	100	50	0	0	1	50	22938758	22938807	1.7e-18	93.5
Bn-A01-p19946190	A01	1	100	50	0	0	1	50	22955408	22955457	1.7e-18	93.5
Bn-A01-p19955264	A01	1	100	50	0	0	1	50	22967416	22967465	1.7e-18	93.5
Bn-A01-p19983739	A01	1	100	50	0	0	1	50	22996042	22995993	1.7e-18	93.5
Bn-A01-p19993388	A01	1	100	50	0	0	1	50	23005795	23005844	1.7e-18	93.5
Bn-A01-p20133687	A01	1	100	50	0	0	1	50	23133860	23133909	1.7e-18	93.5
Bn-A01-p20144596	A01	1	100	50	0	0	1	50	23152408	23152359	1.7e-18	93.5
Bn-A01-p20147405	A01	1	100	50	0	0	1	50	23156580	23156531	1.7e-18	93.5
Bn-Scaffold014697-p80	A01	1	100	50	0	0	1	50	23167946	23167897	1.7e-18	93.5
Bn-A01-p20167230	A01	1	100	50	0	0	1	50	23181023	23181072	1.7e-18	93.5
Bn-A01-p20181046	A01	1	98	50	0	1	1	50	23190120	23190168	2.85e-16	86.1
Bn-A01-p20196813	A01	1	100	50	0	0	1	50	23215416	23215367	1.7e-18	93.5
Bn-A01-p20207440	A01	1	100	50	0	0	1	50	23230037	23230086	1.7e-18	93.5
Bn-A01-p20211387	A01	1	100	50	0	0	1	50	23233975	23234024	1.7e-18	93.5
Bn-A01-p20211329	A01	1	100	50	0	0	1	50	23234017	23233968	1.7e-18	93.5
Bn-A01-p20240168	A01	1	100	50	0	0	1	50	23277520	23277569	1.7e-18	93.5
Bn-A01-p20246564	A01	1	100	50	0	0	1	50	23286128	23286177	1.7e-18	93.5
Bn-A01-p20246840	A01	1	100	50	0	0	1	50	23286404	23286453	1.7e-18	93.5
Bn-A01-p20248379	A01	1	100	50	0	0	1	50	23288041	23287992	1.7e-18	93.5
Bn-A01-p20259868	A01	1	100	50	0	0	1	50	23298062	23298013	1.7e-18	93.5
Bn-A01-p20282705	A01	1	100	44	0	0	1	44	23339686	23339729	3.69e-15	82.4
Bn-A01-p20323059	A01	1	100	50	0	0	1	50	23369442	23369393	1.7e-18	93.5
Bn-A01-p20397807	A01	1	100	50	0	0	1	50	23462037	23461988	1.7e-18	93.5
Bn-A01-p20430407	A01	1	100	50	0	0	1	50	23501995	23501946	1.7e-18	93.5
Bn-A01-p20471502	A01	1	100	50	0	0	1	50	23528282	23528331	1.7e-18	93.5
Bn-A01-p20482459	A01	1	100	50	0	0	1	50	23557740	23557691	1.7e-18	93.5
Bn-A01-p20483938	A01	1	100	50	0	0	1	50	23559227	23559178	1.7e-18	93.5
Bn-A01-p20497397	A01	1	100	50	0	0	1	50	23566998	23566949	1.7e-18	93.5
Bn-A01-p20564016	A01	1	100	50	0	0	1	50	23660917	23660966	1.7e-18	93.5
Bn-Scaffold001779-p127	A01	1	100	50	0	0	1	50	23695723	23695674	1.7e-18	93.5
Bn-A01-p20696971	A01	1	100	50	0	0	1	50	23765559	23765510	1.7e-18	93.5
Bn-A01-p20745330	A01	1	100	50	0	0	1	50	23817753	23817704	1.7e-18	93.5
Bn-A01-p20745820	A01	1	100	50	0	0	1	50	23818150	23818199	1.7e-18	93.5
Bn-A01-p20753932	A01	1	100	50	0	0	1	50	23826064	23826113	1.7e-18	93.5
Bn-A01-p20761933	A01	1	100	50	0	0	1	50	23831243	23831292	1.7e-18	93.5
Bn-A01-p20789828	A01	1	100	50	0	0	1	50	23862024	23862073	1.7e-18	93.5
Bn-A01-p20805506	A01	1	100	50	0	0	1	50	23875772	23875723	1.7e-18	93.5
Bn-A01-p20805613	A01	1	100	50	0	0	1	50	23875879	23875830	1.7e-18	93.5
Bn-A01-p20836664	A01	1	100	50	0	0	1	50	23915025	23914976	1.7e-18	93.5
Bn-A01-p20866022	A01	1	100	50	0	0	1	50	23955673	23955624	1.7e-18	93.5
Bn-A01-p20866518	A01	1	100	50	0	0	1	50	23956070	23956119	1.7e-18	93.5
Bn-A01-p20873189	A01	1	100	50	0	0	1	50	23961164	23961115	1.7e-18	93.5
Bn-A01-p20890858	A01	1	100	50	0	0	1	50	23973596	23973645	1.7e-18	93.5
Bn-A01-p20892145	A01	1	100	50	0	0	1	50	23974890	23974939	1.7e-18	93.5
Bn-A01-p20892080	A01	1	100	50	0	0	1	50	23974925	23974876	1.7e-18	93.5
Bn-A01-p20899472	A01	1	100	50	0	0	1	50	23981899	23981850	1.7e-18	93.5
Bn-A01-p20924050	A01	1	100	47	0	0	4	50	24008783	24008737	7.93e-17	87.9
Bn-A01-p20933189	A01	1	100	50	0	0	1	50	24017750	24017799	1.7e-18	93.5
Bn-A01-p20987149	A01	1	100	50	0	0	1	50	24077756	24077707	1.7e-18	93.5
Bn-A01-p20988977	A01	1	100	50	0	0	1	50	24079484	24079533	1.7e-18	93.5
Bn-A01-p20990218	A01	1	100	50	0	0	1	50	24080830	24080781	1.7e-18	93.5
Bn-A01-p21018746	A01	1	100	50	0	0	1	50	24110533	24110484	1.7e-18	93.5
Bn-A01-p21035670	A01	1	100	50	0	0	1	50	24115064	24115015	1.7e-18	93.5
Bn-scaff_15879_1-p426186	A01	1	100	49	0	0	2	50	24147070	24147118	6.13e-18	91.6
Bn-A01-p21075183	A01	1	100	50	0	0	1	50	24167058	24167107	1.7e-18	93.5
Bn-A01-p21079129	A01	1	100	50	0	0	1	50	24168628	24168677	1.7e-18	93.5
Bn-A01-p21079348	A01	1	100	50	0	0	1	50	24168947	24168898	1.7e-18	93.5
Bn-A01-p21079774	A01	1	100	50	0	0	1	50	24169373	24169324	1.7e-18	93.5
Bn-A01-p21079909	A01	1	100	50	0	0	1	50	24169508	24169459	1.7e-18	93.5
Bn-A01-p21106413	A01	1	100	50	0	0	1	50	24188665	24188616	1.7e-18	93.5
Bn-A01-p21106687	A01	1	100	50	0	0	1	50	24188839	24188888	1.7e-18	93.5
Bn-A01-p21107496	A01	1	98.039	51	0	1	1	50	24191029	24190979	7.93e-17	87.9
Bn-A01-p21108496	A01	1	100	50	0	0	1	50	24192029	24191980	1.7e-18	93.5
Bn-A01-p21135145	A01	1	100	50	0	0	1	50	24224136	24224087	1.7e-18	93.5
Bn-A01-p21136052	A01	1	100	50	0	0	1	50	24224931	24224980	1.7e-18	93.5
Bn-A01-p21141514	A01	1	100	50	0	0	1	50	24230698	24230649	1.7e-18	93.5
Bn-A01-p21145008	A01	1	100	50	0	0	1	50	24234096	24234145	1.7e-18	93.5
Bn-A01-p21236322	A01	1	100	50	0	0	1	50	24340657	24340706	1.7e-18	93.5
Bn-A01-p21393260	A01	1	100	50	0	0	1	50	24674981	24674932	1.7e-18	93.5
Bn-A01-p21394483	A01	1	100	50	0	0	1	50	24676108	24676157	1.7e-18	93.5
Bn-A01-p21430708	A01	1	100	50	0	0	1	50	24717113	24717162	1.7e-18	93.5
Bn-scaff_17036_1-p94786	A01	1	100	50	0	0	1	50	24717968	24717919	1.7e-18	93.5
Bn-A01-p21473161	A01	1	100	50	0	0	1	50	24761589	24761540	1.7e-18	93.5
Bn-A01-p21479969	A01	1	100	50	0	0	1	50	24768730	24768681	1.7e-18	93.5
Bn-A01-p21484088	A01	1	100	50	0	0	1	50	24772745	24772794	1.7e-18	93.5
Bn-A01-p21499792	A01	1	100	50	0	0	1	50	24783527	24783478	1.7e-18	93.5
Bn-A01-p21500509	A01	1	100	50	0	0	1	50	24784243	24784194	1.7e-18	93.5
Bn-A01-p21512266	A01	1	100	50	0	0	1	50	24788400	24788351	1.7e-18	93.5
Bn-A01-p21512514	A01	1	100	50	0	0	1	50	24788549	24788598	1.7e-18	93.5
Bn-A01-p21512663	A01	1	100	50	0	0	1	50	24788700	24788749	1.7e-18	93.5
Bn-A01-p21513096	A01	1	100	50	0	0	1	50	24789132	24789181	1.7e-18	93.5
Bn-A01-p21517353	A01	1	100	50	0	0	1	50	24789383	24789432	1.7e-18	93.5
Bn-A01-p21527187	A01	1	100	50	0	0	1	50	24799699	24799748	1.7e-18	93.5
Bn-A01-p21556957	A01	1	100	50	0	0	1	50	24824893	24824942	1.7e-18	93.5
Bn-A01-p21605865	A01	1	100	50	0	0	1	50	24878572	24878621	1.7e-18	93.5
Bn-A01-p21634235	A01	1	100	50	0	0	1	50	24900434	24900483	1.7e-18	93.5
Bn-A01-p21634265	A01	1	100	50	0	0	1	50	24900564	24900515	1.7e-18	93.5
Bn-A01-p21634646	A01	1	100	50	0	0	1	50	24900945	24900896	1.7e-18	93.5
Bn-A01-p21635000	A01	1	100	50	0	0	1	50	24901299	24901250	1.7e-18	93.5
Bn-A01-p21635137	A01	1	100	50	0	0	1	50	24901436	24901387	1.7e-18	93.5
Bn-A01-p21635270	A01	1	100	50	0	0	1	50	24901469	24901518	1.7e-18	93.5
Bn-A01-p21636048	A01	1	100	50	0	0	1	50	24902247	24902296	1.7e-18	93.5
Bn-A01-p21638516	A01	1	100	50	0	0	1	50	24904840	24904889	1.7e-18	93.5
Bn-A01-p21643354	A01	1	100	50	0	0	1	50	24909413	24909462	1.7e-18	93.5
Bn-A01-p21644756	A01	1	100	50	0	0	1	50	24910899	24910850	1.7e-18	93.5
Bn-A01-p21663900	A01	1	100	50	0	0	1	50	24929290	24929241	1.7e-18	93.5
Bn-A01-p21708353	A01	1	100	50	0	0	1	50	25003510	25003559	1.7e-18	93.5
Bn-A01-p21709916	A01	1	100	48	0	0	3	50	25004794	25004841	2.2e-17	89.8
Bn-A01-p21715162	A01	1	100	50	0	0	1	50	25010686	25010735	1.7e-18	93.5
Bn-A01-p21724511	A01	1	100	50	0	0	1	50	25019409	25019360	1.7e-18	93.5
Bn-A01-p21758046	A01	1	100	50	0	0	1	50	25055001	25054952	1.7e-18	93.5
Bn-A01-p21776016	A01	1	100	50	0	0	1	50	25083117	25083068	1.7e-18	93.5
Bn-A01-p21776155	A01	1	100	50	0	0	1	50	25083156	25083205	1.7e-18	93.5
Bn-A01-p21776083	A01	1	100	50	0	0	1	50	25083184	25083135	1.7e-18	93.5
Bn-A01-p21791128	A01	1	100	50	0	0	1	50	25096445	25096396	1.7e-18	93.5
Bn-A01-p21846342	A01	1	100	50	0	0	1	50	25124953	25125002	1.7e-18	93.5
Bn-A01-p21855770	A01	1	100	50	0	0	1	50	25139116	25139165	1.7e-18	93.5
Bn-A01-p21860162	A01	1	100	50	0	0	1	50	25149002	25148953	1.7e-18	93.5
Bn-Scaffold010152-p149	A01	1	100	50	0	0	1	50	25177754	25177803	1.7e-18	93.5
Bn-A01-p21926431	A01	1	100	50	0	0	1	50	25221684	25221733	1.7e-18	93.5
Bn-A01-p21928497	A01	1	100	50	0	0	1	50	25223748	25223797	1.7e-18	93.5
Bn-A01-p21928531	A01	1	100	50	0	0	1	50	25223882	25223833	1.7e-18	93.5
Bn-A01-p21928927	A01	1	100	50	0	0	1	50	25224178	25224227	1.7e-18	93.5
Bn-A01-p21930611	A01	1	100	50	0	0	1	50	25225862	25225911	1.7e-18	93.5
Bn-A01-p21930738	A01	1	100	45	0	0	1	45	25226091	25226047	1.03e-15	84.2
Bn-A01-p21930931	A01	1	100	50	0	0	1	50	25226284	25226235	1.7e-18	93.5
Bn-A01-p21931228	A01	1	100	50	0	0	1	50	25226482	25226531	1.7e-18	93.5
Bn-A01-p21931498	A01	1	100	50	0	0	1	50	25226751	25226800	1.7e-18	93.5
Bn-A01-p21931622	A01	1	100	50	0	0	1	50	25226875	25226924	1.7e-18	93.5
Bn-A01-p21931853	A01	1	100	50	0	0	1	50	25227206	25227157	1.7e-18	93.5
Bn-A01-p21960901	A01	1	100	50	0	0	1	50	25255707	25255756	1.7e-18	93.5
Bn-A01-p21969405	A01	1	100	50	0	0	1	50	25262580	25262629	1.7e-18	93.5
Bn-A01-p21980567	A01	1	100	50	0	0	1	50	25273209	25273160	1.7e-18	93.5
Bn-A01-p22014707	A01	1	100	50	0	0	1	50	25333262	25333311	1.7e-18	93.5
Bn-A01-p22038749	A01	1	100	50	0	0	1	50	25345510	25345559	1.7e-18	93.5
Bn-A01-p22038776	A01	1	100	50	0	0	1	50	25345637	25345588	1.7e-18	93.5
Bn-A01-p22051502	A01	1	100	50	0	0	1	50	25358637	25358686	1.7e-18	93.5
Bn-A01-p22051510	A01	1	100	50	0	0	1	50	25358744	25358695	1.7e-18	93.5
Bn-A01-p22087364	A01	1	100	50	0	0	1	50	25403106	25403155	1.7e-18	93.5
Bn-A01-p22087629	A01	1	100	50	0	0	1	50	25403371	25403420	1.7e-18	93.5
Bn-A01-p22681496	A01	1	100	50	0	0	1	50	25537896	25537847	1.7e-18	93.5
Bn-A01-p22684301	A01	1	100	50	0	0	1	50	25540690	25540641	1.7e-18	93.5
Bn-A01-p22685756	A01	1	100	50	0	0	1	50	25542082	25542131	1.7e-18	93.5
Bn-A01-p22741943	A01	1	100	50	0	0	1	50	25608114	25608163	1.7e-18	93.5
Bn-A01-p22768523	A01	1	100	50	0	0	1	50	25654140	25654189	1.7e-18	93.5
Bn-A01-p22841111	A01	1	100	50	0	0	1	50	25738523	25738474	1.7e-18	93.5
Bn-A01-p22937843	A01	1	100	50	0	0	1	50	25798463	25798512	1.7e-18	93.5
Bn-A01-p22948925	A01	1	100	50	0	0	1	50	25809096	25809047	1.7e-18	93.5
Bn-A01-p22949106	A01	1	100	50	0	0	1	50	25809177	25809226	1.7e-18	93.5
Bn-A01-p22999151	A01	1	100	50	0	0	1	50	25865435	25865386	1.7e-18	93.5
Bn-A01-p23020726	A01	1	100	50	0	0	1	50	25884685	25884734	1.7e-18	93.5
Bn-A01-p23078554	A01	1	100	50	0	0	1	50	25973627	25973676	1.7e-18	93.5
Bn-A01-p23080525	A01	1	100	50	0	0	1	50	25975564	25975613	1.7e-18	93.5
Bn-A01-p23085796	A01	1	100	50	0	0	1	50	25982212	25982261	1.7e-18	93.5
Bn-A01-p23086253	A01	1	100	50	0	0	1	50	25982763	25982714	1.7e-18	93.5
Bn-A01-p23087044	A01	1	100	50	0	0	1	50	25983445	25983396	1.7e-18	93.5
Bn-A01-p23087707	A01	1	100	50	0	0	1	50	25984103	25984054	1.7e-18	93.5
Bn-A01-p23096147	A01	1	100	50	0	0	1	50	25991669	25991718	1.7e-18	93.5
Bn-A01-p23097693	A01	1	100	50	0	0	1	50	25993180	25993229	1.7e-18	93.5
Bn-A01-p23111844	A01	1	98	50	0	1	1	50	26002841	26002793	2.85e-16	86.1
Bn-A01-p23169607	A01	1	100	50	0	0	1	50	26050942	26050893	1.7e-18	93.5
Bn-A01-p23175111	A01	1	100	50	0	0	1	50	26056952	26056903	1.7e-18	93.5
Bn-A01-p23181293	A01	1	100	50	0	0	1	50	26063148	26063099	1.7e-18	93.5
Bn-A01-p23195492	A01	1	100	50	0	0	1	50	26102634	26102683	1.7e-18	93.5
Bn-A01-p23253678	A01	1	100	50	0	0	1	50	26143987	26144036	1.7e-18	93.5
Bn-A01-p23259034	A01	1	100	50	0	0	1	50	26149524	26149573	1.7e-18	93.5
Bn-A01-p23259741	A01	1	100	50	0	0	1	50	26150229	26150278	1.7e-18	93.5
Bn-A01-p23279247	A01	1	100	50	0	0	1	50	26177264	26177215	1.7e-18	93.5
Bn-A01-p23280094	A01	1	100	50	0	0	1	50	26178111	26178062	1.7e-18	93.5
Bn-A01-p23281709	A01	1	100	50	0	0	1	50	26179616	26179665	1.7e-18	93.5
Bn-A01-p23281878	A01	1	100	50	0	0	1	50	26179885	26179836	1.7e-18	93.5
Bn-A01-p23288238	A01	1	100	50	0	0	1	50	26186190	26186239	1.7e-18	93.5
Bn-A01-p23322438	A01	1	100	50	0	0	1	50	26222303	26222352	1.7e-18	93.5
Bn-A01-p23322377	A01	1	100	50	0	0	1	50	26222342	26222293	1.7e-18	93.5
Bn-A01-p23330944	A01	1	100	50	0	0	1	50	26232828	26232779	1.7e-18	93.5
Bn-scaff_17515_1-p583013	A01	1	96	50	2	0	1	50	26233003	26233052	3.69e-15	82.4
Bn-scaff_17515_1-p563548	A01	1	100	50	0	0	1	50	26249358	26249309	1.7e-18	93.5
Bn-A01-p23370802	A01	1	100	50	0	0	1	50	26273986	26274035	1.7e-18	93.5
Bn-A01-p23472380	A01	1	100	50	0	0	1	50	26408827	26408778	1.7e-18	93.5
Bn-A01-p23472646	A01	1	100	50	0	0	1	50	26408992	26409041	1.7e-18	93.5
Bn-A01-p23477194	A01	1	100	50	0	0	1	50	26412634	26412683	1.7e-18	93.5
Bn-A01-p23538267	A01	1	100	50	0	0	1	50	26470734	26470783	1.7e-18	93.5
Bn-A01-p23538856	A01	1	100	50	0	0	1	50	26471423	26471374	1.7e-18	93.5
Bn-A01-p23539305	A01	1	100	50	0	0	1	50	26475496	26475447	1.7e-18	93.5
Bn-A01-p23560747	A01	1	100	50	0	0	1	50	26496758	26496709	1.7e-18	93.5
Bn-A06-p9371495	A01	1	100	50	0	0	1	50	26511651	26511700	1.7e-18	93.5
Bn-A01-p23582571	A01	1	100	50	0	0	1	50	26515486	26515437	1.7e-18	93.5
Bn-A01-p23586266	A01	1	100	50	0	0	1	50	26519067	26519116	1.7e-18	93.5
Bn-A01-p23600621	A01	1	100	50	0	0	1	50	26534135	26534086	1.7e-18	93.5
Bn-A01-p23602361	A01	1	100	50	0	0	1	50	26535806	26535855	1.7e-18	93.5
Bn-A01-p23614494	A01	1	100	50	0	0	1	50	26562483	26562434	1.7e-18	93.5
Bn-A01-p23616839	A01	1	100	50	0	0	1	50	26565113	26565162	1.7e-18	93.5
Bn-A01-p23638107	A01	1	100	50	0	0	1	50	26587994	26587945	1.7e-18	93.5
Bn-A01-p23685466	A01	1	100	50	0	0	1	50	26636907	26636956	1.7e-18	93.5
Bn-A01-p23685978	A01	1	100	50	0	0	1	50	26637419	26637468	1.7e-18	93.5
Bn-A01-p23694782	A01	1	100	50	0	0	1	50	26646323	26646274	1.7e-18	93.5
Bn-A01-p23739022	A01	1	100	50	0	0	1	50	26690224	26690273	1.7e-18	93.5
Bn-A01-p23763782	A01	1	100	50	0	0	1	50	26726586	26726537	1.7e-18	93.5
Bn-A01-p23785561	A01	1	98.039	51	0	1	1	50	26759726	26759676	7.93e-17	87.9
Bn-A01-p23809071	A01	1	100	50	0	0	1	50	26774814	26774765	1.7e-18	93.5
Bn-A01-p23810423	A01	1	100	50	0	0	1	50	26776180	26776131	1.7e-18	93.5
Bn-A01-p23819116	A01	1	100	50	0	0	1	50	26784780	26784731	1.7e-18	93.5
Bn-A01-p23843030	A01	1	100	50	0	0	1	50	26810625	26810674	1.7e-18	93.5
Bn-A01-p23876801	A01	1	100	50	0	0	1	50	26843033	26843082	1.7e-18	93.5
Bn-A01-p23961368	A01	1	100	50	0	0	1	50	26909270	26909221	1.7e-18	93.5
Bn-A01-p23950559	A01	1	100	50	0	0	1	50	26920065	26920114	1.7e-18	93.5
Bn-A01-p23948008	A01	1	100	50	0	0	1	50	26922600	26922551	1.7e-18	93.5
Bn-A01-p23943508	A01	1	100	50	0	0	1	50	26927766	26927717	1.7e-18	93.5
Bn-A01-p23938571	A01	1	100	50	0	0	1	50	26928905	26928856	1.7e-18	93.5
Bn-A01-p23905191	A01	1	100	50	0	0	1	50	26958460	26958411	1.7e-18	93.5
Bn-A01-p24020373	A01	1	100	50	0	0	1	50	26975631	26975582	1.7e-18	93.5
Bn-A01-p24308957	A01	1	100	50	0	0	1	50	26990277	26990228	1.7e-18	93.5
Bn-A01-p24309386	A01	1	98.039	51	0	1	1	50	26990604	26990654	7.93e-17	87.9
Bn-A01-p24310993	A01	1	100	50	0	0	1	50	26992718	26992767	1.7e-18	93.5
Bn-A01-p24319792	A01	1	100	50	0	0	1	50	27001878	27001927	1.7e-18	93.5
Bn-A01-p24320794	A01	1	100	50	0	0	1	50	27002071	27002120	1.7e-18	93.5
Bn-A01-p24346952	A01	1	100	48	0	0	3	50	27017542	27017589	2.2e-17	89.8
Bn-A01-p24360206	A01	1	100	50	0	0	1	50	27029846	27029895	1.7e-18	93.5
Bn-A01-p24425829	A01	1	100	50	0	0	1	50	27112416	27112465	1.7e-18	93.5
Bn-A01-p24431478	A01	1	100	50	0	0	1	50	27118453	27118404	1.7e-18	93.5
Bn-A01-p24435452	A01	1	100	50	0	0	1	50	27127879	27127928	1.7e-18	93.5
Bn-A01-p24487852	A01	1	100	50	0	0	1	50	27338740	27338691	1.7e-18	93.5
Bn-A01-p24504495	A01	1	100	50	0	0	1	50	27360252	27360203	1.7e-18	93.5
Bn-A01-p24504575	A01	1	100	50	0	0	1	50	27360332	27360283	1.7e-18	93.5
Bn-A01-p24525303	A01	1	100	50	0	0	1	50	27381592	27381543	1.7e-18	93.5
Bn-A01-p24529391	A01	1	100	50	0	0	1	50	27385597	27385646	1.7e-18	93.5
Bn-A01-p24541095	A01	1	100	50	0	0	1	50	27394767	27394718	1.7e-18	93.5
Bn-A01-p24556230	A01	1	100	50	0	0	1	50	27407406	27407455	1.7e-18	93.5
Bn-A01-p24565084	A01	1	100	50	0	0	1	50	27414270	27414319	1.7e-18	93.5
Bn-A01-p24565311	A01	1	100	50	0	0	1	50	27414497	27414546	1.7e-18	93.5
Bn-A01-p24575679	A01	1	100	50	0	0	1	50	27430928	27430977	1.7e-18	93.5
Bn-A01-p24578644	A01	1	100	50	0	0	1	50	27435411	27435362	1.7e-18	93.5
Bn-A01-p24634303	A01	1	100	50	0	0	1	50	27486518	27486469	1.7e-18	93.5
Bn-A01-p24635378	A01	1	100	50	0	0	1	50	27492259	27492308	1.7e-18	93.5
Bn-A01-p24636537	A01	1	100	50	0	0	1	50	27493776	27493727	1.7e-18	93.5
Bn-A01-p24646334	A01	1	100	50	0	0	1	50	27503525	27503574	1.7e-18	93.5
Bn-A01-p24655110	A01	1	100	50	0	0	1	50	27512483	27512532	1.7e-18	93.5
Bn-scaff_16534_1-p2419545	A01	1	100	50	0	0	1	50	27551374	27551325	1.7e-18	93.5
Bn-A01-p24696367	A01	1	100	50	0	0	1	50	27553032	27552983	1.7e-18	93.5
Bn-A01-p24697185	A01	1	100	50	0	0	1	50	27553850	27553801	1.7e-18	93.5
Bn-A01-p24701885	A01	1	100	50	0	0	1	50	27558598	27558647	1.7e-18	93.5
Bn-A01-p24703150	A01	1	100	50	0	0	1	50	27559866	27559915	1.7e-18	93.5
Bn-A01-p24705790	A01	1	100	50	0	0	1	50	27562538	27562587	1.7e-18	93.5
Bn-A01-p24706378	A01	1	100	50	0	0	1	50	27563226	27563177	1.7e-18	93.5
Bn-A01-p24707727	A01	1	100	50	0	0	1	50	27564480	27564529	1.7e-18	93.5
Bn-A01-p24811222	A01	1	100	50	0	0	1	50	27637815	27637766	1.7e-18	93.5
Bn-A01-p24813515	A01	1	100	50	0	0	1	50	27638654	27638703	1.7e-18	93.5
Bn-A01-p24828081	A01	1	100	50	0	0	1	50	27648529	27648480	1.7e-18	93.5
Bn-A01-p24829988	A01	1	100	50	0	0	1	50	27650335	27650384	1.7e-18	93.5
Bn-A01-p24830366	A01	1	100	50	0	0	1	50	27650813	27650764	1.7e-18	93.5
Bn-A01-p24835306	A01	1	100	50	0	0	1	50	27655769	27655720	1.7e-18	93.5
Bn-A01-p24835449	A01	1	100	50	0	0	1	50	27655812	27655861	1.7e-18	93.5
Bn-A01-p24839451	A01	1	100	50	0	0	1	50	27659785	27659834	1.7e-18	93.5
Bn-A01-p24839905	A01	1	100	50	0	0	1	50	27660243	27660292	1.7e-18	93.5
Bn-A01-p24840306	A01	1	100	50	0	0	1	50	27660744	27660695	1.7e-18	93.5
Bn-A01-p24849993	A01	1	100	50	0	0	1	50	27670434	27670385	1.7e-18	93.5
Bn-A01-p24915384	A01	1	100	50	0	0	1	50	27743174	27743125	1.7e-18	93.5
Bn-A01-p24920662	A01	1	98	50	0	1	1	50	27752256	27752304	2.85e-16	86.1
Bn-A01-p24921162	A01	1	100	50	0	0	1	50	27753328	27753279	1.7e-18	93.5
Bn-A01-p24921355	A01	1	100	50	0	0	1	50	27753413	27753462	1.7e-18	93.5
Bn-A01-p24950985	A01	1	100	50	0	0	1	50	27773321	27773370	1.7e-18	93.5
Bn-scaff_16567_1-p40709	A01	1	100	50	0	0	1	50	27793885	27793934	1.7e-18	93.5
Bn-A01-p24974533	A01	1	100	50	0	0	1	50	27803644	27803693	1.7e-18	93.5
Bn-A01-p24976705	A01	1	100	50	0	0	1	50	27805784	27805833	1.7e-18	93.5
Bn-A01-p24981413	A01	1	100	50	0	0	1	50	27809376	27809327	1.7e-18	93.5
Bn-A01-p25007130	A01	1	100	50	0	0	1	50	27833143	27833192	1.7e-18	93.5
Bn-Scaffold000164-p262883	A01	1	100	50	0	0	1	50	27849939	27849890	1.7e-18	93.5
Bn-Scaffold000164-p283036	A01	1	100	50	0	0	1	50	27866742	27866791	1.7e-18	93.5
Bn-Scaffold000164-p283953	A01	1	100	50	0	0	1	50	27867352	27867401	1.7e-18	93.5
Bn-Scaffold000164-p300241	A01	1	100	49	0	0	2	50	27877790	27877838	6.13e-18	91.6
Bn-Scaffold000164-p300180	A01	1	98	50	0	1	1	50	27877828	27877780	2.85e-16	86.1
Bn-Scaffold000164-p300838	A01	1	98.039	51	0	1	1	50	27878437	27878487	7.93e-17	87.9
Bn-scaff_16323_1-p39826	A01	1	100	50	0	0	1	50	27883374	27883325	1.7e-18	93.5
Bn-Scaffold000164-p310059	A01	1	100	50	0	0	1	50	27884625	27884576	1.7e-18	93.5
Bn-Scaffold000164-p310542	A01	1	100	50	0	0	1	50	27885118	27885069	1.7e-18	93.5
Bn-Scaffold000164-p310953	A01	1	100	50	0	0	1	50	27885429	27885478	1.7e-18	93.5
Bn-Scaffold000164-p247723	A01	1	100	50	0	0	1	50	28018840	28018889	1.7e-18	93.5
Bn-Scaffold000164-p244754	A01	1	100	50	0	0	1	50	28028238	28028189	1.7e-18	93.5
Bn-Scaffold000164-p244631	A01	1	100	50	0	0	1	50	28028261	28028310	1.7e-18	93.5
Bn-Scaffold000164-p244616	A01	1	100	50	0	0	1	50	28028376	28028327	1.7e-18	93.5
Bn-Scaffold000164-p243886	A01	1	98.039	51	0	1	1	50	28029104	28029054	7.93e-17	87.9
Bn-Scaffold000164-p196553	A01	1	100	50	0	0	1	50	28081803	28081852	1.7e-18	93.5
Bn-Scaffold000164-p196290	A01	1	100	50	0	0	1	50	28082066	28082115	1.7e-18	93.5
Bn-Scaffold000164-p196286	A01	1	100	50	0	0	1	50	28082170	28082121	1.7e-18	93.5
Bn-Scaffold000164-p195645	A01	1	100	50	0	0	1	50	28082711	28082760	1.7e-18	93.5
Bn-Scaffold000164-p192732	A01	1	100	50	0	0	1	50	28085696	28085647	1.7e-18	93.5
Bn-Scaffold000164-p192232	A01	1	100	50	0	0	1	50	28086192	28086143	1.7e-18	93.5
Bn-Scaffold000164-p160466	A01	1	100	50	0	0	1	50	28116967	28117016	1.7e-18	93.5
Bn-Scaffold000164-p133924	A01	1	100	50	0	0	1	50	28142060	28142109	1.7e-18	93.5
Bn-Scaffold000164-p120459	A01	1	100	50	0	0	1	50	28146527	28146576	1.7e-18	93.5
Bn-Scaffold000164-p89745	A01	1	100	50	0	0	1	50	28183171	28183122	1.7e-18	93.5
Bn-Scaffold000164-p55747	A01	1	100	50	0	0	1	50	28217251	28217300	1.7e-18	93.5
Bn-Scaffold000164-p46170	A01	1	100	50	0	0	1	50	28227043	28227092	1.7e-18	93.5
Bn-Scaffold000164-p39872	A01	1	100	50	0	0	1	50	28233321	28233370	1.7e-18	93.5
Bn-Scaffold000164-p11112	A01	1	100	50	0	0	1	50	28265866	28265915	1.7e-18	93.5
Bn-A01-p27079797	A01	1	98	50	1	0	1	50	28408297	28408248	7.93e-17	87.9
Bn-scaff_16691_1-p1409735	A01	1	97.872	47	1	0	1	47	28655842	28655888	3.69e-15	82.4
Bn-A01-p27202461	A01	1	100	50	0	0	1	50	28659732	28659781	1.7e-18	93.5
Bn-A01-p27220075	A01	1	100	50	0	0	1	50	28665078	28665029	1.7e-18	93.5
Bn-A01-p27225628	A01	1	98	50	1	0	1	50	28667163	28667212	7.93e-17	87.9
Bn-scaff_15712_3-p653523	A01	1	100	50	0	0	1	50	28860705	28860656	1.7e-18	93.5
Bn-scaff_15712_3-p639489	A01	1	100	50	0	0	1	50	28874648	28874697	1.7e-18	93.5
Bn-scaff_15712_3-p639396	A01	1	100	50	0	0	1	50	28874741	28874790	1.7e-18	93.5
Bn-scaff_15712_3-p639330	A01	1	100	50	0	0	1	50	28874807	28874856	1.7e-18	93.5
Bn-scaff_15712_3-p639383	A01	1	100	50	0	0	1	50	28874854	28874805	1.7e-18	93.5
Bn-scaff_15712_3-p639153	A01	1	100	50	0	0	1	50	28874984	28875033	1.7e-18	93.5
Bn-scaff_15712_3-p639141	A01	1	100	50	0	0	1	50	28875096	28875047	1.7e-18	93.5
Bn-scaff_15712_3-p638707	A01	1	100	50	0	0	1	50	28875430	28875479	1.7e-18	93.5
Bn-scaff_15712_3-p638373	A01	1	100	50	0	0	1	50	28875763	28875812	1.7e-18	93.5
Bn-scaff_15712_3-p638133	A01	1	100	50	0	0	1	50	28876104	28876055	1.7e-18	93.5
Bn-scaff_15712_3-p637975	A01	1	100	50	0	0	1	50	28876262	28876213	1.7e-18	93.5
Bn-scaff_15712_3-p636961	A01	1	100	50	0	0	1	50	28877176	28877225	1.7e-18	93.5
Bn-scaff_15712_3-p637021	A01	1	100	50	0	0	1	50	28877216	28877167	1.7e-18	93.5
Bn-scaff_15712_3-p636861	A01	1	100	50	0	0	1	50	28877276	28877325	1.7e-18	93.5
Bn-scaff_15712_3-p636695	A01	1	100	50	0	0	1	50	28877442	28877491	1.7e-18	93.5
Bn-scaff_15712_3-p627936	A01	1	100	50	0	0	1	50	28886206	28886255	1.7e-18	93.5
Bn-scaff_15712_3-p627461	A01	1	100	50	0	0	1	50	28886681	28886730	1.7e-18	93.5
Bn-scaff_15712_3-p627192	A01	1	100	50	0	0	1	50	28886950	28886999	1.7e-18	93.5
Bn-scaff_15712_3-p624487	A01	1	100	50	0	0	1	50	28889655	28889704	1.7e-18	93.5
Bn-scaff_15712_3-p624550	A01	1	100	50	0	0	1	50	28889692	28889643	1.7e-18	93.5
Bn-scaff_15712_3-p591064	A01	1	100	50	0	0	1	50	28929386	28929337	1.7e-18	93.5
Bn-scaff_15712_3-p590881	A01	1	100	50	0	0	1	50	28929469	28929518	1.7e-18	93.5
Bn-scaff_15712_3-p587644	A01	1	100	50	0	0	1	50	28932706	28932755	1.7e-18	93.5
Bn-scaff_15712_3-p587089	A01	1	100	50	0	0	1	50	28933261	28933310	1.7e-18	93.5
Bn-scaff_15712_3-p586735	A01	1	100	50	0	0	1	50	28933615	28933664	1.7e-18	93.5
Bn-scaff_15712_3-p586615	A01	1	100	50	0	0	1	50	28933735	28933784	1.7e-18	93.5
Bn-scaff_15712_3-p586448	A01	1	100	50	0	0	1	50	28933902	28933951	1.7e-18	93.5
Bn-scaff_15712_3-p566111	A01	1	100	50	0	0	1	50	28955615	28955566	1.7e-18	93.5
Bn-scaff_15712_3-p562225	A01	1	100	50	0	0	1	50	28959503	28959454	1.7e-18	93.5
Bn-scaff_15712_3-p561822	A01	1	100	50	0	0	1	50	28959806	28959855	1.7e-18	93.5
Bn-scaff_15712_3-p561909	A01	1	100	50	0	0	1	50	28959819	28959770	1.7e-18	93.5
Bn-scaff_15712_3-p561474	A01	1	100	50	0	0	1	50	28960254	28960205	1.7e-18	93.5
Bn-scaff_15712_3-p561344	A01	1	100	50	0	0	1	50	28960384	28960335	1.7e-18	93.5
Bn-scaff_15712_3-p560870	A01	1	100	50	0	0	1	50	28960758	28960807	1.7e-18	93.5
Bn-scaff_15712_3-p548753	A01	1	100	50	0	0	1	50	28972506	28972555	1.7e-18	93.5
Bn-scaff_15712_3-p548741	A01	1	100	50	0	0	1	50	28972618	28972569	1.7e-18	93.5
Bn-scaff_15712_3-p548581	A01	1	100	50	0	0	1	50	28972778	28972729	1.7e-18	93.5
Bn-scaff_15712_3-p548440	A01	1	100	50	0	0	1	50	28972919	28972870	1.7e-18	93.5
Bn-scaff_15712_3-p543124	A01	1	100	50	0	0	1	50	28978722	28978771	1.7e-18	93.5
Bn-scaff_15712_3-p536381	A01	1	100	50	0	0	1	50	28985564	28985515	1.7e-18	93.5
Bn-scaff_15712_3-p518209	A01	1	100	50	0	0	1	50	29004659	29004610	1.7e-18	93.5
Bn-scaff_15712_3-p516388	A01	1	100	50	0	0	1	50	29006380	29006429	1.7e-18	93.5
Bn-scaff_15712_3-p509872	A01	1	100	50	0	0	1	50	29012896	29012945	1.7e-18	93.5
Bn-scaff_15712_3-p504863	A01	1	100	50	0	0	1	50	29018005	29017956	1.7e-18	93.5
Bn-scaff_15712_3-p493370	A01	1	100	50	0	0	1	50	29028043	29028092	1.7e-18	93.5
Bn-scaff_15712_3-p489739	A01	1	100	50	0	0	1	50	29031676	29031725	1.7e-18	93.5
Bn-scaff_15712_3-p482620	A01	1	100	50	0	0	1	50	29039001	29038952	1.7e-18	93.5
Bn-scaff_15712_3-p481009	A01	1	100	50	0	0	1	50	29040512	29040561	1.7e-18	93.5
Bn-scaff_15712_3-p480731	A01	1	100	50	0	0	1	50	29040790	29040839	1.7e-18	93.5
Bn-scaff_15712_3-p480089	A01	1	100	50	0	0	1	50	29041532	29041483	1.7e-18	93.5
Bn-A01-p27622120	A01	1	100	50	0	0	1	50	29152412	29152461	1.7e-18	93.5
Bn-A01-p27622168	A01	1	100	50	0	0	1	50	29152560	29152511	1.7e-18	93.5
Bn-A01-p27623686	A01	1	100	50	0	0	1	50	29154112	29154063	1.7e-18	93.5
Bn-A01-p27668070	A01	1	100	50	0	0	1	50	29191606	29191557	1.7e-18	93.5
Bn-A01-p27673018	A01	1	100	50	0	0	1	50	29196502	29196551	1.7e-18	93.5
Bn-A01-p27722989	A01	1	100	50	0	0	1	50	29324345	29324296	1.7e-18	93.5
Bn-scaff_15712_3-p88356	A01	1	100	50	0	0	1	50	29389188	29389139	1.7e-18	93.5
Bn-A01-p27774124	A01	1	100	50	0	0	1	50	29393257	29393208	1.7e-18	93.5
Bn-A01-p27774386	A01	1	100	50	0	0	1	50	29393519	29393470	1.7e-18	93.5
Bn-A01-p27774666	A01	1	100	50	0	0	1	50	29393697	29393746	1.7e-18	93.5
Bn-A01-p27777763	A01	1	100	50	0	0	1	50	29396652	29396701	1.7e-18	93.5
Bn-A01-p27796877	A01	1	100	50	0	0	1	50	29420178	29420129	1.7e-18	93.5
Bn-A01-p27797076	A01	1	100	50	0	0	1	50	29420377	29420328	1.7e-18	93.5
Bn-A01-p27810962	A01	1	100	50	0	0	1	50	29429541	29429492	1.7e-18	93.5
Bn-A01-p27822000	A01	1	100	50	0	0	1	50	29511640	29511689	1.7e-18	93.5
Bn-A01-p27822790	A01	1	100	50	0	0	1	50	29512430	29512479	1.7e-18	93.5
Bn-A01-p27830372	A01	1	100	50	0	0	1	50	29520009	29520058	1.7e-18	93.5
Bn-A01-p27831569	A01	1	100	50	0	0	1	50	29521206	29521255	1.7e-18	93.5
Bn-A01-p27834452	A01	1	100	50	0	0	1	50	29527063	29527112	1.7e-18	93.5
Bn-A01-p27834392	A01	1	98.039	51	0	1	1	50	29527103	29527053	7.93e-17	87.9
Bn-scaff_24117_1-p20746	A01	1	100	50	0	0	1	50	29531355	29531404	1.7e-18	93.5
Bn-A01-p27843242	A01	1	100	50	0	0	1	50	29535703	29535654	1.7e-18	93.5
Bn-A01-p27845673	A01	1	100	50	0	0	1	50	29538038	29538087	1.7e-18	93.5
Bn-A01-p27846544	A01	1	100	50	0	0	1	50	29538910	29538959	1.7e-18	93.5
Bn-A01-p27877194	A01	1	100	50	0	0	1	50	29569820	29569771	1.7e-18	93.5
Bn-A01-p27893933	A01	1	100	50	0	0	1	50	29585341	29585292	1.7e-18	93.5
Bn-A01-p27905344	A01	1	100	50	0	0	1	50	29597191	29597240	1.7e-18	93.5
Bn-A01-p27907422	A01	1	100	50	0	0	1	50	29599369	29599320	1.7e-18	93.5
Bn-A01-p28245023	A01	1	100	50	0	0	1	50	29932957	29933006	1.7e-18	93.5
Bn-A01-p28249918	A01	1	98.039	51	0	1	1	50	29937980	29938030	7.93e-17	87.9
Bn-A01-p28250936	A01	1	100	50	0	0	1	50	29939099	29939050	1.7e-18	93.5
Bn-A01-p28278192	A01	1	98.039	51	0	1	1	50	29968066	29968116	7.93e-17	87.9
Bn-A01-p28285580	A01	1	100	50	0	0	1	50	29975501	29975452	1.7e-18	93.5
Bn-A01-p28326025	A01	1	100	50	0	0	1	50	30010221	30010270	1.7e-18	93.5
Bn-A01-p28333226	A01	1	100	50	0	0	1	50	30021658	30021707	1.7e-18	93.5
Bn-A01-p28336382	A01	1	100	50	0	0	1	50	30024864	30024913	1.7e-18	93.5
Bn-A01-p28336754	A01	1	100	50	0	0	1	50	30025336	30025287	1.7e-18	93.5
Bn-scaff_16342_1-p104963	A01	1	100	50	0	0	1	50	30029545	30029594	1.7e-18	93.5
Bn-Scaffold000215-p78165	A01	1	100	50	0	0	1	50	30172922	30172971	1.7e-18	93.5
Bn-Scaffold000215-p67874	A01	1	100	50	0	0	1	50	30180496	30180447	1.7e-18	93.5
Bn-Scaffold000215-p61990	A01	1	100	50	0	0	1	50	30190766	30190815	1.7e-18	93.5
Bn-Scaffold000215-p42890	A01	1	100	50	0	0	1	50	30205524	30205573	1.7e-18	93.5
Bn-Scaffold000215-p13136	A01	1	100	50	0	0	1	50	30233098	30233049	1.7e-18	93.5
Bn-Scaffold000215-p6257	A01	1	100	50	0	0	1	50	30240109	30240158	1.7e-18	93.5
Bn-Scaffold000215-p4493	A01	1	100	50	0	0	1	50	30241881	30241930	1.7e-18	93.5
Bn-scaff_18621_1-p137934	A01	1	100	50	0	0	1	50	30654482	30654433	1.7e-18	93.5
Bn-scaff_18621_1-p137565	A01	1	100	50	0	0	1	50	30654851	30654802	1.7e-18	93.5
Bn-scaff_18621_1-p137223	A01	1	100	50	0	0	1	50	30655193	30655144	1.7e-18	93.5
Bn-scaff_18621_1-p85309	A01	1	100	50	0	0	1	50	30758819	30758868	1.7e-18	93.5
Bn-scaff_16554_1-p133285	A01	1	100	50	0	0	1	50	31039072	31039121	1.7e-18	93.5
Bn-scaff_16554_1-p160063	A01	1	100	50	0	0	1	50	31063192	31063241	1.7e-18	93.5
Bn-scaff_16554_1-p160009	A01	1	100	50	0	0	1	50	31063238	31063189	1.7e-18	93.5
Bn-scaff_16554_1-p160189	A01	1	100	50	0	0	1	50	31063318	31063367	1.7e-18	93.5
Bn-scaff_16554_1-p160094	A01	1	100	50	0	0	1	50	31063323	31063274	1.7e-18	93.5
Bn-scaff_16554_1-p160287	A01	1	100	50	0	0	1	50	31063416	31063465	1.7e-18	93.5
Bn-scaff_16554_1-p160463	A01	1	100	50	0	0	1	50	31063692	31063643	1.7e-18	93.5
Bn-scaff_16554_1-p160955	A01	1	100	47	0	0	4	50	31064033	31064079	7.93e-17	87.9
Bn-scaff_16554_1-p161479	A01	1	100	50	0	0	1	50	31064654	31064605	1.7e-18	93.5
Bn-A01-p26447438	A01	1	100	50	0	0	1	50	31229129	31229080	1.7e-18	93.5
Bn-A01-p26461873	A01	1	100	50	0	0	1	50	31243269	31243220	1.7e-18	93.5
Bn-A01-p26516918	A01	1	100	50	0	0	1	50	31297497	31297546	1.7e-18	93.5
Bn-A01-p26519047	A01	1	100	50	0	0	1	50	31299626	31299675	1.7e-18	93.5
Bn-A01-p26541761	A01	1	100	50	0	0	1	50	31530317	31530268	1.7e-18	93.5
Bn-A01-p26543758	A01	1	100	50	0	0	1	50	31532214	31532263	1.7e-18	93.5
Bn-scaff_21884_1-p807260	A01	1	100	50	0	0	1	50	31548538	31548587	1.7e-18	93.5
Bn-A01-p26568738	A01	1	100	50	0	0	1	50	31555189	31555238	1.7e-18	93.5
Bn-A01-p26571596	A01	1	100	50	0	0	1	50	31558048	31558097	1.7e-18	93.5
Bn-A01-p26572331	A01	1	100	50	0	0	1	50	31558782	31558831	1.7e-18	93.5
Bn-A01-p26575652	A01	1	100	50	0	0	1	50	31563140	31563189	1.7e-18	93.5
Bn-A01-p26592021	A01	1	100	50	0	0	1	50	31576656	31576607	1.7e-18	93.5
Bn-A01-p26594603	A01	1	100	50	0	0	1	50	31579275	31579226	1.7e-18	93.5
Bn-scaff_21884_1-p866739	A01	1	100	50	0	0	1	50	31589411	31589460	1.7e-18	93.5
Bn-A01-p26604864	A01	1	100	50	0	0	1	50	31589829	31589878	1.7e-18	93.5
Bn-A01-p26614232	A01	1	100	50	0	0	1	50	31599411	31599362	1.7e-18	93.5
Bn-A01-p26624315	A01	1	100	50	0	0	1	50	31609601	31609650	1.7e-18	93.5
Bn-A01-p26627091	A01	1	100	50	0	0	1	50	31612399	31612448	1.7e-18	93.5
Bn-scaff_21884_1-p966054	A01	1	100	50	0	0	1	50	31651806	31651757	1.7e-18	93.5
Bn-scaff_21884_1-p984114	A01	1	100	50	0	0	1	50	31666530	31666579	1.7e-18	93.5
Bn-A01-p27115455	A01	1	100	50	0	0	1	50	31854228	31854179	1.7e-18	93.5
Bn-A01-p27331467	A01	1	100	50	0	0	1	50	32642961	32642912	1.7e-18	93.5
Bn-A01-p27463135	A01	1	100	50	0	0	1	50	32791235	32791186	1.7e-18	93.5
Bn-A02-p1530996	A02	1	100	50	0	0	1	50	117165	117116	1.7e-18	93.5
Bn-A02-p1552305	A02	1	100	50	0	0	1	50	140328	140279	1.7e-18	93.5
Bn-A02-p1684625	A02	1	100	50	0	0	1	50	267985	267936	1.7e-18	93.5
Bn-A02-p1687398	A02	1	98	50	0	1	1	50	270750	270702	2.85e-16	86.1
Bn-A02-p1788566	A02	1	100	50	0	0	1	50	394393	394344	1.7e-18	93.5
Bn-A02-p1890913	A02	1	100	50	0	0	1	50	488003	487954	1.7e-18	93.5
Bn-A02-p1997812	A02	1	100	50	0	0	1	50	592057	592106	1.7e-18	93.5
Bn-A02-p2122414	A02	1	100	50	0	0	1	50	700093	700142	1.7e-18	93.5
Bn-A02-p2122850	A02	1	100	50	0	0	1	50	700630	700581	1.7e-18	93.5
Bn-A02-p2124245	A02	1	100	50	0	0	1	50	701842	701793	1.7e-18	93.5
Bn-A02-p2124421	A02	1	100	50	0	0	1	50	701915	701964	1.7e-18	93.5
Bn-A02-p2128775	A02	1	100	50	0	0	1	50	705228	705179	1.7e-18	93.5
Bn-A02-p2134112	A02	1	100	50	0	0	1	50	710642	710593	1.7e-18	93.5
Bn-A02-p2136039	A02	1	100	50	0	0	1	50	712451	712500	1.7e-18	93.5
Bn-A02-p2138408	A02	1	100	50	0	0	1	50	714905	714856	1.7e-18	93.5
Bn-A02-p2146210	A02	1	100	50	0	0	1	50	722786	722835	1.7e-18	93.5
Bn-A02-p2165239	A02	1	100	50	0	0	1	50	739805	739756	1.7e-18	93.5
Bn-A02-p2258714	A02	1	100	50	0	0	1	50	830328	830377	1.7e-18	93.5
Bn-A02-p2287712	A02	1	100	50	0	0	1	50	870918	870967	1.7e-18	93.5
Bn-A02-p2292871	A02	1	100	50	0	0	1	50	877178	877227	1.7e-18	93.5
Bn-A02-p2364069	A02	1	100	50	0	0	1	50	945336	945385	1.7e-18	93.5
Bn-A02-p2421888	A02	1	100	50	0	0	1	50	1004375	1004424	1.7e-18	93.5
Bn-A02-p2443275	A02	1	100	50	0	0	1	50	1019214	1019165	1.7e-18	93.5
Bn-A02-p2451470	A02	1	100	50	0	0	1	50	1027335	1027384	1.7e-18	93.5
Bn-A02-p2466355	A02	1	100	50	0	0	1	50	1044995	1044946	1.7e-18	93.5
Bn-A02-p2480400	A02	1	100	50	0	0	1	50	1062276	1062227	1.7e-18	93.5
Bn-A02-p2502950	A02	1	100	50	0	0	1	50	1084558	1084607	1.7e-18	93.5
Bn-A02-p2509802	A02	1	100	50	0	0	1	50	1091848	1091799	1.7e-18	93.5
Bn-A02-p2520421	A02	1	100	50	0	0	1	50	1102454	1102405	1.7e-18	93.5
Bn-A02-p2527735	A02	1	100	50	0	0	1	50	1115106	1115155	1.7e-18	93.5
Bn-A02-p2536779	A02	1	100	50	0	0	1	50	1124162	1124211	1.7e-18	93.5
Bn-A02-p2542065	A02	1	100	50	0	0	1	50	1129441	1129490	1.7e-18	93.5
Bn-A02-p2549141	A02	1	98.039	51	0	1	1	50	1135609	1135559	7.93e-17	87.9
Bn-A02-p2557799	A02	1	100	50	0	0	1	50	1144366	1144415	1.7e-18	93.5
Bn-A02-p2572194	A02	1	100	50	0	0	1	50	1159054	1159103	1.7e-18	93.5
Bn-A02-p2572625	A02	1	100	50	0	0	1	50	1159595	1159546	1.7e-18	93.5
Bn-A02-p2608125	A02	1	100	50	0	0	1	50	1191340	1191291	1.7e-18	93.5
Bn-A02-p2615923	A02	1	100	50	0	0	1	50	1198752	1198703	1.7e-18	93.5
Bn-A02-p2617781	A02	1	100	50	0	0	1	50	1200509	1200558	1.7e-18	93.5
Bn-A02-p2617701	A02	1	100	50	0	0	1	50	1200529	1200480	1.7e-18	93.5
Bn-A02-p2624375	A02	1	100	50	0	0	1	50	1207200	1207151	1.7e-18	93.5
Bn-A02-p2638031	A02	1	100	50	0	0	1	50	1221858	1221809	1.7e-18	93.5
Bn-A02-p2643078	A02	1	100	50	0	0	1	50	1226901	1226852	1.7e-18	93.5
Bn-A02-p2654991	A02	1	100	50	0	0	1	50	1238688	1238639	1.7e-18	93.5
Bn-A02-p2692116	A02	1	100	50	0	0	1	50	1268380	1268331	1.7e-18	93.5
Bn-A02-p2695870	A02	1	100	50	0	0	1	50	1272180	1272131	1.7e-18	93.5
Bn-A02-p2698217	A02	1	100	50	0	0	1	50	1274420	1274469	1.7e-18	93.5
Bn-A02-p2707979	A02	1	98	50	0	1	1	50	1284786	1284738	2.85e-16	86.1
Bn-A02-p2708161	A02	1	100	50	0	0	1	50	1284868	1284917	1.7e-18	93.5
Bn-A02-p2718786	A02	1	100	50	0	0	1	50	1294722	1294673	1.7e-18	93.5
Bn-A02-p2727560	A02	1	100	50	0	0	1	50	1303811	1303762	1.7e-18	93.5
Bn-A02-p2738923	A02	1	100	50	0	0	1	50	1310207	1310256	1.7e-18	93.5
Bn-A02-p2739888	A02	1	100	50	0	0	1	50	1311171	1311220	1.7e-18	93.5
Bn-A02-p2753403	A02	1	100	50	0	0	1	50	1325567	1325616	1.7e-18	93.5
Bn-A02-p2753972	A02	1	100	50	0	0	1	50	1326236	1326187	1.7e-18	93.5
Bn-A02-p1372727	A02	1	100	50	0	0	1	50	1488365	1488316	1.7e-18	93.5
Bn-A02-p1337706	A02	1	100	50	0	0	1	50	1516644	1516693	1.7e-18	93.5
Bn-A02-p1327787	A02	1	100	50	0	0	1	50	1532894	1532943	1.7e-18	93.5
Bn-A02-p1326013	A02	1	100	50	0	0	1	50	1534614	1534663	1.7e-18	93.5
Bn-A02-p1325213	A02	1	100	50	0	0	1	50	1535514	1535465	1.7e-18	93.5
Bn-A02-p1319039	A02	1	96	50	2	0	1	50	1541807	1541856	3.69e-15	82.4
Bn-A02-p1265949	A02	1	100	50	0	0	1	50	1589450	1589499	1.7e-18	93.5
Bn-A02-p1259929	A02	1	100	50	0	0	1	50	1595866	1595915	1.7e-18	93.5
Bn-A02-p1235480	A02	1	100	50	0	0	1	50	1621681	1621730	1.7e-18	93.5
Bn-A02-p1232964	A02	1	100	50	0	0	1	50	1624197	1624246	1.7e-18	93.5
Bn-A02-p1135078	A02	1	100	50	0	0	1	50	1715337	1715386	1.7e-18	93.5
Bn-A02-p1096082	A02	1	100	50	0	0	1	50	1763038	1762989	1.7e-18	93.5
Bn-A02-p1092146	A02	1	100	50	0	0	1	50	1766978	1766929	1.7e-18	93.5
Bn-A10-p16198852	A02	1	100	50	0	0	1	50	1790038	1789989	1.7e-18	93.5
Bn-A02-p1068542	A02	1	100	50	0	0	1	50	1796605	1796556	1.7e-18	93.5
Bn-A02-p2784335	A02	1	100	50	0	0	1	50	1842973	1842924	1.7e-18	93.5
Bn-A02-p2785185	A02	1	100	50	0	0	1	50	1843848	1843799	1.7e-18	93.5
Bn-A02-p2788144	A02	1	100	50	0	0	1	50	1846884	1846835	1.7e-18	93.5
Bn-A02-p2799146	A02	1	100	49	0	0	1	49	1855865	1855817	6.13e-18	91.6
Bn-A02-p2800227	A02	1	100	50	0	0	1	50	1856875	1856924	1.7e-18	93.5
Bn-A02-p2800579	A02	1	100	50	0	0	1	50	1857228	1857277	1.7e-18	93.5
Bn-A02-p2800698	A02	1	100	50	0	0	1	50	1857446	1857397	1.7e-18	93.5
Bn-A02-p2817281	A02	1	100	50	0	0	1	50	1869433	1869482	1.7e-18	93.5
Bn-A02-p2817294	A02	1	100	50	0	0	1	50	1869546	1869497	1.7e-18	93.5
Bn-A02-p2818741	A02	1	100	50	0	0	1	50	1870924	1870875	1.7e-18	93.5
Bn-A02-p2867545	A02	1	96	50	2	0	1	50	1923142	1923093	3.69e-15	82.4
Bn-A02-p2923889	A02	1	100	50	0	0	1	50	1965941	1965892	1.7e-18	93.5
Bn-A02-p2927357	A02	1	100	50	0	0	1	50	1969592	1969543	1.7e-18	93.5
Bn-A02-p2931725	A02	1	100	50	0	0	1	50	1975392	1975441	1.7e-18	93.5
Bn-scaff_15714_1-p1934829	A02	1	100	50	0	0	1	50	2167525	2167476	1.7e-18	93.5
Bn-A02-p3145923	A02	1	100	50	0	0	1	50	2191613	2191662	1.7e-18	93.5
Bn-A02-p3167622	A02	1	100	50	0	0	1	50	2213029	2212980	1.7e-18	93.5
Bn-A02-p3167673	A02	1	100	50	0	0	1	50	2213080	2213031	1.7e-18	93.5
Bn-A02-p3175610	A02	1	100	50	0	0	1	50	2220587	2220538	1.7e-18	93.5
Bn-A02-p3180162	A02	1	100	50	0	0	1	50	2222346	2222297	1.7e-18	93.5
Bn-A02-p3181443	A02	1	100	50	0	0	1	50	2229636	2229587	1.7e-18	93.5
Bn-A02-p3207085	A02	1	100	50	0	0	1	50	2256666	2256715	1.7e-18	93.5
Bn-A02-p3208275	A02	1	100	50	0	0	1	50	2257736	2257785	1.7e-18	93.5
Bn-A02-p3214095	A02	1	100	50	0	0	1	50	2267382	2267431	1.7e-18	93.5
Bn-A02-p3221060	A02	1	100	50	0	0	1	50	2274449	2274400	1.7e-18	93.5
Bn-A02-p3221634	A02	1	100	50	0	0	1	50	2274919	2274968	1.7e-18	93.5
Bn-A02-p3233816	A02	1	100	50	0	0	1	50	2288187	2288236	1.7e-18	93.5
Bn-A02-p3260536	A02	1	100	49	0	0	1	49	2312423	2312375	6.13e-18	91.6
Bn-A02-p3281338	A02	1	100	50	0	0	1	50	2332518	2332567	1.7e-18	93.5
Bn-A02-p3281452	A02	1	100	49	0	0	1	49	2332647	2332695	6.13e-18	91.6
Bn-A02-p3294682	A02	1	100	49	0	0	1	49	2352325	2352373	6.13e-18	91.6
Bn-A02-p3295898	A02	1	100	50	0	0	1	50	2353811	2353860	1.7e-18	93.5
Bn-A02-p3297592	A02	1	100	50	0	0	1	50	2355246	2355295	1.7e-18	93.5
Bn-A02-p3299206	A02	1	100	50	0	0	1	50	2356965	2356916	1.7e-18	93.5
Bn-A02-p3300731	A02	1	100	50	0	0	1	50	2358485	2358436	1.7e-18	93.5
Bn-A02-p3302725	A02	1	100	50	0	0	1	50	2360372	2360421	1.7e-18	93.5
Bn-A02-p3306076	A02	1	100	50	0	0	1	50	2363797	2363748	1.7e-18	93.5
Bn-A02-p3344176	A02	1	100	50	0	0	1	50	2401757	2401806	1.7e-18	93.5
Bn-A02-p3352863	A02	1	100	50	0	0	1	50	2410804	2410853	1.7e-18	93.5
Bn-A02-p3398506	A02	1	100	50	0	0	1	50	2460137	2460186	1.7e-18	93.5
Bn-A02-p3398710	A02	1	100	50	0	0	1	50	2460441	2460392	1.7e-18	93.5
Bn-A02-p3422005	A02	1	100	50	0	0	1	50	2480496	2480545	1.7e-18	93.5
Bn-A02-p3427640	A02	1	100	50	0	0	1	50	2486204	2486155	1.7e-18	93.5
Bn-A02-p3430069	A02	1	100	50	0	0	1	50	2488634	2488585	1.7e-18	93.5
Bn-scaff_15714_1-p1537912	A02	1	98	50	1	0	1	50	2498930	2498979	7.93e-17	87.9
Bn-A02-p3446017	A02	1	100	50	0	0	1	50	2500483	2500532	1.7e-18	93.5
Bn-A02-p3530703	A02	1	98.039	51	0	1	1	50	2569189	2569239	7.93e-17	87.9
Bn-A02-p3534963	A02	1	100	50	0	0	1	50	2573431	2573480	1.7e-18	93.5
Bn-A02-p3539297	A02	1	100	50	0	0	1	50	2577632	2577681	1.7e-18	93.5
Bn-A02-p3539377	A02	1	100	50	0	0	1	50	2577812	2577763	1.7e-18	93.5
Bn-A02-p3542024	A02	1	100	50	0	0	1	50	2580348	2580397	1.7e-18	93.5
Bn-A02-p3543810	A02	1	100	50	0	0	1	50	2582234	2582185	1.7e-18	93.5
Bn-A02-p3558502	A02	1	100	50	0	0	1	50	2595233	2595282	1.7e-18	93.5
Bn-A02-p3571230	A02	1	100	50	0	0	1	50	2609403	2609452	1.7e-18	93.5
Bn-A02-p3597721	A02	1	100	50	0	0	1	50	2635824	2635873	1.7e-18	93.5
Bn-A02-p3614673	A02	1	100	50	0	0	1	50	2651478	2651527	1.7e-18	93.5
Bn-A02-p3633790	A02	1	100	50	0	0	1	50	2671506	2671457	1.7e-18	93.5
Bn-A02-p3635114	A02	1	100	50	0	0	1	50	2672728	2672777	1.7e-18	93.5
Bn-A02-p3640490	A02	1	100	49	0	0	1	49	2678098	2678146	6.13e-18	91.6
Bn-A02-p3679028	A02	1	100	50	0	0	1	50	2717177	2717128	1.7e-18	93.5
Bn-A02-p3708263	A02	1	100	50	0	0	1	50	2737165	2737116	1.7e-18	93.5
Bn-A02-p3711684	A02	1	100	50	0	0	1	50	2739136	2739185	1.7e-18	93.5
Bn-A02-p3717426	A02	1	100	50	0	0	1	50	2744916	2744965	1.7e-18	93.5
Bn-A02-p3718340	A02	1	100	50	0	0	1	50	2745994	2745945	1.7e-18	93.5
Bn-A02-p3742509	A02	1	100	50	0	0	1	50	2769423	2769472	1.7e-18	93.5
Bn-A02-p3759462	A02	1	100	50	0	0	1	50	2784232	2784281	1.7e-18	93.5
Bn-A02-p3760177	A02	1	100	50	0	0	1	50	2785068	2785019	1.7e-18	93.5
Bn-A02-p3774623	A02	1	100	50	0	0	1	50	2799528	2799479	1.7e-18	93.5
Bn-A02-p3792136	A02	1	100	50	0	0	1	50	2816974	2817023	1.7e-18	93.5
Bn-A02-p3796695	A02	1	100	50	0	0	1	50	2821512	2821561	1.7e-18	93.5
Bn-A02-p3803198	A02	1	100	50	0	0	1	50	2825053	2825102	1.7e-18	93.5
Bn-A02-p3803477	A02	1	100	50	0	0	1	50	2825432	2825383	1.7e-18	93.5
Bn-A02-p3810078	A02	1	100	50	0	0	1	50	2832371	2832322	1.7e-18	93.5
Bn-A02-p3821814	A02	1	100	50	0	0	1	50	2844313	2844264	1.7e-18	93.5
Bn-A02-p3821944	A02	1	100	50	0	0	1	50	2844343	2844392	1.7e-18	93.5
Bn-A02-p3860483	A02	1	100	50	0	0	1	50	2879442	2879393	1.7e-18	93.5
Bn-A02-p3897213	A02	1	100	50	0	0	1	50	2913975	2913926	1.7e-18	93.5
Bn-A02-p3914269	A02	1	100	50	0	0	1	50	2929818	2929769	1.7e-18	93.5
Bn-A02-p3934729	A02	1	100	50	0	0	1	50	2942369	2942418	1.7e-18	93.5
Bn-A02-p3950581	A02	1	100	50	0	0	1	50	2962114	2962065	1.7e-18	93.5
Bn-A02-p3965286	A02	1	100	50	0	0	1	50	2996114	2996163	1.7e-18	93.5
Bn-A02-p3978921	A02	1	100	50	0	0	1	50	3011638	3011589	1.7e-18	93.5
Bn-A02-p4035808	A02	1	100	50	0	0	1	50	3063365	3063414	1.7e-18	93.5
Bn-A02-p4037028	A02	1	100	50	0	0	1	50	3064585	3064634	1.7e-18	93.5
Bn-A02-p4038224	A02	1	100	50	0	0	1	50	3065781	3065830	1.7e-18	93.5
Bn-A02-p4045217	A02	1	100	50	0	0	1	50	3069010	3069059	1.7e-18	93.5
Bn-A02-p4046982	A02	1	100	50	0	0	1	50	3070807	3070758	1.7e-18	93.5
Bn-scaff_15714_1-p642855	A02	1	100	50	0	0	1	50	3095150	3095101	1.7e-18	93.5
Bn-A02-p4110181	A02	1	100	50	0	0	1	50	3127420	3127371	1.7e-18	93.5
Bn-A02-p4118946	A02	1	100	50	0	0	1	50	3136641	3136690	1.7e-18	93.5
Bn-A02-p4151292	A02	1	100	50	0	0	1	50	3172093	3172142	1.7e-18	93.5
Bn-A02-p4199792	A02	1	100	50	0	0	1	50	3215939	3215988	1.7e-18	93.5
Bn-A02-p4201122	A02	1	100	50	0	0	1	50	3217341	3217390	1.7e-18	93.5
Bn-A02-p4220181	A02	1	100	50	0	0	1	50	3239666	3239617	1.7e-18	93.5
Bn-A02-p4232093	A02	1	100	50	0	0	1	50	3245957	3245908	1.7e-18	93.5
Bn-A02-p4237047	A02	1	100	50	0	0	1	50	3249742	3249791	1.7e-18	93.5
Bn-A02-p4262796	A02	1	100	50	0	0	1	50	3301833	3301784	1.7e-18	93.5
Bn-A02-p4262907	A02	1	100	50	0	0	1	50	3301944	3301895	1.7e-18	93.5
Bn-A02-p4277649	A02	1	100	50	0	0	1	50	3308124	3308075	1.7e-18	93.5
Bn-A02-p4290375	A02	1	100	50	0	0	1	50	3326681	3326632	1.7e-18	93.5
Bn-A02-p4291278	A02	1	100	50	0	0	1	50	3327584	3327535	1.7e-18	93.5
Bn-A02-p4295967	A02	1	96	50	2	0	1	50	3332246	3332197	3.69e-15	82.4
Bn-A02-p4299085	A02	1	100	50	0	0	1	50	3335126	3335175	1.7e-18	93.5
Bn-A02-p4299411	A02	1	100	50	0	0	1	50	3335549	3335500	1.7e-18	93.5
Bn-A02-p4345098	A02	1	100	50	0	0	1	50	3391747	3391796	1.7e-18	93.5
Bn-A02-p4345046	A02	1	100	50	0	0	1	50	3391795	3391746	1.7e-18	93.5
Bn-A02-p4352396	A02	1	100	50	0	0	1	50	3398768	3398719	1.7e-18	93.5
Bn-A02-p4567454	A02	1	100	50	0	0	1	50	3613035	3613084	1.7e-18	93.5
Bn-A02-p4744168	A02	1	100	50	0	0	1	50	3910882	3910931	1.7e-18	93.5
Bn-A02-p4761483	A02	1	100	50	0	0	1	50	3925856	3925905	1.7e-18	93.5
Bn-A02-p4773307	A02	1	100	50	0	0	1	50	3933529	3933578	1.7e-18	93.5
Bn-A02-p4881323	A02	1	100	50	0	0	1	50	4043791	4043840	1.7e-18	93.5
Bn-A02-p6084757	A02	1	100	50	0	0	1	50	5359723	5359674	1.7e-18	93.5
Bn-A02-p6105931	A02	1	100	50	0	0	1	50	5390640	5390591	1.7e-18	93.5
Bn-A02-p6147823	A02	1	100	50	0	0	1	50	5417459	5417410	1.7e-18	93.5
Bn-A02-p6149358	A02	1	100	50	0	0	1	50	5418969	5418920	1.7e-18	93.5
Bn-A02-p6156818	A02	1	100	50	0	0	1	50	5421027	5421076	1.7e-18	93.5
Bn-A02-p6164030	A02	1	100	50	0	0	1	50	5423802	5423753	1.7e-18	93.5
Bn-A02-p6167491	A02	1	100	50	0	0	1	50	5432217	5432168	1.7e-18	93.5
Bn-A02-p6182038	A02	1	100	50	0	0	1	50	5449052	5449003	1.7e-18	93.5
Bn-A02-p6182486	A02	1	100	50	0	0	1	50	5455439	5455390	1.7e-18	93.5
Bn-A02-p6202881	A02	1	100	50	0	0	1	50	5477073	5477122	1.7e-18	93.5
Bn-A02-p6203059	A02	1	100	50	0	0	1	50	5477351	5477302	1.7e-18	93.5
Bn-A02-p6206533	A02	1	98.039	51	0	1	1	50	5480375	5480325	7.93e-17	87.9
Bn-A02-p6206785	A02	1	100	50	0	0	1	50	5480629	5480580	1.7e-18	93.5
Bn-A02-p6209563	A02	1	100	50	0	0	1	50	5482264	5482313	1.7e-18	93.5
Bn-A02-p6237474	A02	1	100	50	0	0	1	50	5516668	5516717	1.7e-18	93.5
Bn-A02-p6244013	A02	1	100	50	0	0	1	50	5523275	5523226	1.7e-18	93.5
Bn-A02-p6267188	A02	1	100	50	0	0	1	50	5547325	5547374	1.7e-18	93.5
Bn-A02-p6267300	A02	1	100	50	0	0	1	50	5547537	5547488	1.7e-18	93.5
Bn-A02-p6277812	A02	1	100	50	0	0	1	50	5558053	5558004	1.7e-18	93.5
Bn-A02-p6280517	A02	1	100	50	0	0	1	50	5560658	5560707	1.7e-18	93.5
Bn-A02-p6300284	A02	1	100	50	0	0	1	50	5581129	5581080	1.7e-18	93.5
Bn-A02-p6315978	A02	1	100	50	0	0	1	50	5592366	5592317	1.7e-18	93.5
Bn-A02-p6366262	A02	1	100	50	0	0	1	50	5648068	5648117	1.7e-18	93.5
Bn-A02-p6384663	A02	1	100	50	0	0	1	50	5675303	5675352	1.7e-18	93.5
Bn-A02-p6392450	A02	1	100	50	0	0	1	50	5683163	5683212	1.7e-18	93.5
Bn-A02-p6439449	A02	1	100	50	0	0	1	50	5742239	5742288	1.7e-18	93.5
Bn-A02-p6441318	A02	1	100	50	0	0	1	50	5744171	5744122	1.7e-18	93.5
Bn-A02-p6461773	A02	1	100	50	0	0	1	50	5779519	5779470	1.7e-18	93.5
Bn-A02-p6473898	A02	1	100	50	0	0	1	50	5791548	5791597	1.7e-18	93.5
Bn-A02-p6478309	A02	1	100	50	0	0	1	50	5795922	5795873	1.7e-18	93.5
Bn-A02-p6483805	A02	1	100	50	0	0	1	50	5803198	5803247	1.7e-18	93.5
Bn-A02-p6523411	A02	1	100	50	0	0	1	50	5846190	5846239	1.7e-18	93.5
Bn-A02-p6523609	A02	1	100	50	0	0	1	50	5846384	5846433	1.7e-18	93.5
Bn-A02-p6564856	A02	1	100	50	0	0	1	50	5896607	5896656	1.7e-18	93.5
Bn-A02-p6564861	A02	1	100	50	0	0	1	50	5896712	5896663	1.7e-18	93.5
Bn-A02-p6577065	A02	1	100	50	0	0	1	50	5910359	5910310	1.7e-18	93.5
Bn-A02-p6578877	A02	1	100	50	0	0	1	50	5912171	5912122	1.7e-18	93.5
Bn-A02-p6584506	A02	1	100	50	0	0	1	50	5917786	5917737	1.7e-18	93.5
Bn-A02-p6627382	A02	1	100	50	0	0	1	50	5968877	5968926	1.7e-18	93.5
Bn-A02-p6653554	A02	1	100	50	0	0	1	50	5997627	5997676	1.7e-18	93.5
Bn-A02-p6658392	A02	1	100	50	0	0	1	50	6002544	6002495	1.7e-18	93.5
Bn-A02-p6692347	A02	1	100	50	0	0	1	50	6031060	6031109	1.7e-18	93.5
Bn-A02-p6751482	A02	1	100	50	0	0	1	50	6079287	6079336	1.7e-18	93.5
Bn-A02-p6751605	A02	1	100	50	0	0	1	50	6079509	6079460	1.7e-18	93.5
Bn-A02-p6766615	A02	1	100	50	0	0	1	50	6096647	6096598	1.7e-18	93.5
Bn-A02-p6816192	A02	1	100	50	0	0	1	50	6151548	6151597	1.7e-18	93.5
Bn-A02-p6820464	A02	1	100	50	0	0	1	50	6153851	6153802	1.7e-18	93.5
Bn-Scaffold009013-p209	A02	1	100	50	0	0	1	50	6155063	6155014	1.7e-18	93.5
Bn-A02-p6839427	A02	1	100	50	0	0	1	50	6173437	6173486	1.7e-18	93.5
Bn-A02-p6843407	A02	1	100	50	0	0	1	50	6177520	6177471	1.7e-18	93.5
Bn-A02-p6844873	A02	1	100	50	0	0	1	50	6178886	6178935	1.7e-18	93.5
Bn-A02-p6844903	A02	1	100	50	0	0	1	50	6179016	6178967	1.7e-18	93.5
Bn-A02-p6845122	A02	1	100	50	0	0	1	50	6179135	6179184	1.7e-18	93.5
Bn-A02-p6845049	A02	1	100	50	0	0	1	50	6179162	6179113	1.7e-18	93.5
Bn-A02-p6845953	A02	1	100	50	0	0	1	50	6179966	6180015	1.7e-18	93.5
Bn-A02-p6845958	A02	1	100	50	0	0	1	50	6180071	6180022	1.7e-18	93.5
Bn-A02-p6852756	A02	1	98	50	0	1	1	50	6186783	6186831	2.85e-16	86.1
Bn-A02-p6859259	A02	1	100	50	0	0	1	50	6193286	6193335	1.7e-18	93.5
Bn-A02-p6868939	A02	1	100	50	0	0	1	50	6202108	6202157	1.7e-18	93.5
Bn-A02-p6871477	A02	1	100	50	0	0	1	50	6204720	6204671	1.7e-18	93.5
Bn-A02-p6930285	A02	1	100	50	0	0	1	50	6295255	6295304	1.7e-18	93.5
Bn-A02-p6995796	A02	1	100	50	0	0	1	50	6369522	6369473	1.7e-18	93.5
Bn-A02-p7012860	A02	1	100	50	0	0	1	50	6390915	6390866	1.7e-18	93.5
Bn-A02-p7014257	A02	1	100	50	0	0	1	50	6393619	6393570	1.7e-18	93.5
Bn-A02-p7043311	A02	1	100	50	0	0	1	50	6422502	6422551	1.7e-18	93.5
Bn-A02-p7057571	A02	1	100	50	0	0	1	50	6439159	6439208	1.7e-18	93.5
Bn-A02-p7104549	A02	1	100	50	0	0	1	50	6492473	6492424	1.7e-18	93.5
Bn-A02-p7138191	A02	1	100	50	0	0	1	50	6526858	6526907	1.7e-18	93.5
Bn-A02-p7138093	A02	1	100	50	0	0	1	50	6526860	6526811	1.7e-18	93.5
Bn-A02-p7139447	A02	1	100	50	0	0	1	50	6528212	6528163	1.7e-18	93.5
Bn-A02-p7183200	A02	1	100	50	0	0	1	50	6565724	6565675	1.7e-18	93.5
Bn-A02-p7207945	A02	1	100	50	0	0	1	50	6591077	6591126	1.7e-18	93.5
Bn-A02-p7242957	A02	1	100	50	0	0	1	50	6640639	6640688	1.7e-18	93.5
Bn-A02-p7243236	A02	1	100	50	0	0	1	50	6641018	6640969	1.7e-18	93.5
Bn-A02-p7245763	A02	1	100	50	0	0	1	50	6645977	6646026	1.7e-18	93.5
Bn-A02-p7260577	A02	1	100	50	0	0	1	50	6663553	6663602	1.7e-18	93.5
Bn-A02-p7260946	A02	1	100	50	0	0	1	50	6663927	6663976	1.7e-18	93.5
Bn-A02-p7278330	A02	1	100	50	0	0	1	50	6674551	6674502	1.7e-18	93.5
Bn-A02-p7281627	A02	1	100	50	0	0	1	50	6676604	6676653	1.7e-18	93.5
Bn-A02-p7282115	A02	1	100	50	0	0	1	50	6677103	6677152	1.7e-18	93.5
Bn-A02-p7297184	A02	1	100	50	0	0	1	50	6700618	6700569	1.7e-18	93.5
Bn-A02-p7319800	A02	1	100	50	0	0	1	50	6737246	6737197	1.7e-18	93.5
Bn-A02-p7349063	A02	1	100	50	0	0	1	50	6775317	6775366	1.7e-18	93.5
Bn-A02-p7350064	A02	1	100	50	0	0	1	50	6776418	6776369	1.7e-18	93.5
Bn-A02-p7350199	A02	1	100	50	0	0	1	50	6776553	6776504	1.7e-18	93.5
Bn-A02-p7351109	A02	1	100	50	0	0	1	50	6777463	6777414	1.7e-18	93.5
Bn-A02-p7351619	A02	1	100	50	0	0	1	50	6777973	6777924	1.7e-18	93.5
Bn-A02-p7351746	A02	1	100	50	0	0	1	50	6778000	6778049	1.7e-18	93.5
Bn-A02-p7361744	A02	1	100	49	0	0	1	49	6787919	6787967	6.13e-18	91.6
Bn-A02-p7363071	A02	1	100	50	0	0	1	50	6789245	6789294	1.7e-18	93.5
Bn-A02-p23491463	A02	1	100	50	0	0	1	50	6790533	6790582	1.7e-18	93.5
Bn-A02-p7371108	A02	1	100	50	0	0	1	50	6802433	6802384	1.7e-18	93.5
Bn-A02-p7396082	A02	1	100	49	0	0	2	50	6829013	6829061	6.13e-18	91.6
Bn-A02-p7453258	A02	1	100	50	0	0	1	50	6897600	6897551	1.7e-18	93.5
Bn-A02-p7463965	A02	1	100	50	0	0	1	50	6912962	6913011	1.7e-18	93.5
Bn-A02-p7464997	A02	1	100	50	0	0	1	50	6913969	6914018	1.7e-18	93.5
Bn-A02-p7482915	A02	1	100	50	0	0	1	50	6928400	6928449	1.7e-18	93.5
Bn-A02-p7483376	A02	1	100	48	0	0	3	50	6928959	6928912	2.2e-17	89.8
Bn-A02-p7510882	A02	1	100	50	0	0	1	50	6948142	6948191	1.7e-18	93.5
Bn-A02-p7531907	A02	1	100	50	0	0	1	50	6975059	6975108	1.7e-18	93.5
Bn-A02-p7534591	A02	1	100	50	0	0	1	50	6979155	6979204	1.7e-18	93.5
Bn-A02-p7575736	A02	1	100	50	0	0	1	50	7010306	7010355	1.7e-18	93.5
Bn-A02-p7589454	A02	1	100	50	0	0	1	50	7024728	7024777	1.7e-18	93.5
Bn-A02-p7595911	A02	1	100	50	0	0	1	50	7030774	7030725	1.7e-18	93.5
Bn-A02-p7597314	A02	1	100	50	0	0	1	50	7032229	7032180	1.7e-18	93.5
Bn-A02-p7675384	A02	1	100	50	0	0	1	50	7155361	7155410	1.7e-18	93.5
Bn-A02-p7675505	A02	1	100	50	0	0	1	50	7155482	7155531	1.7e-18	93.5
Bn-A02-p7712926	A02	1	100	50	0	0	1	50	7199673	7199624	1.7e-18	93.5
Bn-scaff_15712_5-p582188	A02	1	100	50	0	0	1	50	7206184	7206135	1.7e-18	93.5
Bn-A02-p7736604	A02	1	100	50	0	0	1	50	7234116	7234165	1.7e-18	93.5
Bn-A02-p7738248	A02	1	100	50	0	0	1	50	7236338	7236289	1.7e-18	93.5
Bn-A02-p7750368	A02	1	100	50	0	0	1	50	7247157	7247206	1.7e-18	93.5
Bn-A02-p7753579	A02	1	100	50	0	0	1	50	7249769	7249818	1.7e-18	93.5
Bn-A02-p7756308	A02	1	100	50	0	0	1	50	7253016	7252967	1.7e-18	93.5
Bn-A02-p7775332	A02	1	100	50	0	0	1	50	7273077	7273126	1.7e-18	93.5
Bn-A02-p7784914	A02	1	100	50	0	0	1	50	7284633	7284682	1.7e-18	93.5
Bn-A02-p7786183	A02	1	100	50	0	0	1	50	7286001	7285952	1.7e-18	93.5
Bn-A02-p7801111	A02	1	100	50	0	0	1	50	7302972	7302923	1.7e-18	93.5
Bn-A02-p7804291	A02	1	100	50	0	0	1	50	7305431	7305480	1.7e-18	93.5
Bn-scaff_15712_5-p67204	A02	1	100	50	0	0	1	50	7347110	7347061	1.7e-18	93.5
Bn-A02-p7848143	A02	1	100	50	0	0	1	50	7357614	7357663	1.7e-18	93.5
Bn-A02-p7853194	A02	1	100	50	0	0	1	50	7362565	7362614	1.7e-18	93.5
Bn-A02-p7882027	A02	1	100	50	0	0	1	50	7387164	7387115	1.7e-18	93.5
Bn-A02-p7885731	A02	1	100	50	0	0	1	50	7390896	7390945	1.7e-18	93.5
Bn-A02-p7892272	A02	1	100	50	0	0	1	50	7397970	7397921	1.7e-18	93.5
Bn-A02-p7892561	A02	1	100	49	0	0	2	50	7398154	7398202	6.13e-18	91.6
Bn-A02-p7893025	A02	1	100	50	0	0	1	50	7398719	7398670	1.7e-18	93.5
Bn-A02-p7893461	A02	1	100	50	0	0	1	50	7399058	7399107	1.7e-18	93.5
Bn-A02-p7893901	A02	1	100	50	0	0	1	50	7399597	7399548	1.7e-18	93.5
Bn-A02-p7894216	A02	1	98.039	51	0	1	1	50	7399810	7399860	7.93e-17	87.9
Bn-A02-p7894339	A02	1	100	50	0	0	1	50	7400040	7399991	1.7e-18	93.5
Bn-A02-p7904444	A02	1	100	50	0	0	1	50	7411104	7411153	1.7e-18	93.5
Bn-A02-p7926823	A02	1	100	50	0	0	1	50	7425961	7425912	1.7e-18	93.5
Bn-A02-p7947982	A02	1	100	50	0	0	1	50	7447310	7447261	1.7e-18	93.5
Bn-A02-p7952281	A02	1	100	50	0	0	1	50	7451510	7451559	1.7e-18	93.5
Bn-A02-p7970283	A02	1	100	50	0	0	1	50	7470427	7470378	1.7e-18	93.5
Bn-A02-p7975165	A02	1	100	50	0	0	1	50	7475156	7475107	1.7e-18	93.5
Bn-A02-p7976278	A02	1	100	50	0	0	1	50	7476169	7476218	1.7e-18	93.5
Bn-A02-p7978230	A02	1	100	50	0	0	1	50	7478121	7478170	1.7e-18	93.5
Bn-A02-p8011131	A02	1	100	50	0	0	1	50	7513507	7513556	1.7e-18	93.5
Bn-A02-p8024157	A02	1	100	50	0	0	1	50	7528732	7528781	1.7e-18	93.5
Bn-A02-p8024784	A02	1	100	50	0	0	1	50	7529461	7529412	1.7e-18	93.5
Bn-A02-p8026465	A02	1	100	50	0	0	1	50	7531140	7531091	1.7e-18	93.5
Bn-A02-p8084362	A02	1	100	50	0	0	1	50	7599114	7599065	1.7e-18	93.5
Bn-A02-p8084605	A02	1	100	50	0	0	1	50	7599257	7599306	1.7e-18	93.5
Bn-A02-p8090196	A02	1	100	50	0	0	1	50	7601958	7601909	1.7e-18	93.5
Bn-A02-p8140997	A02	1	100	50	0	0	1	50	7657026	7657075	1.7e-18	93.5
Bn-A02-p8141909	A02	1	100	50	0	0	1	50	7658038	7657989	1.7e-18	93.5
Bn-A02-p8160522	A02	1	100	50	0	0	1	50	7677104	7677153	1.7e-18	93.5
Bn-A02-p8169665	A02	1	100	50	0	0	1	50	7685663	7685712	1.7e-18	93.5
Bn-A02-p8169424	A02	1	100	50	0	0	1	50	7686004	7685955	1.7e-18	93.5
Bn-A02-p8176181	A02	1	100	50	0	0	1	50	7693877	7693828	1.7e-18	93.5
Bn-A02-p8179492	A02	1	100	50	0	0	1	50	7696732	7696781	1.7e-18	93.5
Bn-A02-p8191099	A02	1	100	50	0	0	1	50	7707054	7707103	1.7e-18	93.5
Bn-A02-p8199891	A02	1	100	50	0	0	1	50	7717639	7717688	1.7e-18	93.5
Bn-A02-p8200381	A02	1	100	50	0	0	1	50	7718129	7718178	1.7e-18	93.5
Bn-A02-p8215285	A02	1	98.039	51	0	1	1	50	7734049	7734099	7.93e-17	87.9
Bn-A02-p8234333	A02	1	100	50	0	0	1	50	7752184	7752233	1.7e-18	93.5
Bn-A02-p8234485	A02	1	100	50	0	0	1	50	7752336	7752385	1.7e-18	93.5
Bn-A02-p8234978	A02	1	100	50	0	0	1	50	7752931	7752882	1.7e-18	93.5
Bn-A02-p8235110	A02	1	100	50	0	0	1	50	7753063	7753014	1.7e-18	93.5
Bn-A02-p8243789	A02	1	100	50	0	0	1	50	7761265	7761216	1.7e-18	93.5
Bn-A02-p8249838	A02	1	100	50	0	0	1	50	7767654	7767605	1.7e-18	93.5
Bn-A02-p8250856	A02	1	100	50	0	0	1	50	7768572	7768621	1.7e-18	93.5
Bn-A02-p8251258	A02	1	100	50	0	0	1	50	7769075	7769026	1.7e-18	93.5
Bn-A02-p8264334	A02	1	100	50	0	0	1	50	7777224	7777175	1.7e-18	93.5
Bn-A02-p8273655	A02	1	100	50	0	0	1	50	7781846	7781895	1.7e-18	93.5
Bn-A02-p8285151	A02	1	100	50	0	0	1	50	7794075	7794124	1.7e-18	93.5
Bn-A02-p8323616	A02	1	100	50	0	0	1	50	7824071	7824120	1.7e-18	93.5
Bn-A02-p8335312	A02	1	100	50	0	0	1	50	7837103	7837054	1.7e-18	93.5
Bn-A02-p8344540	A02	1	100	50	0	0	1	50	7846151	7846200	1.7e-18	93.5
Bn-A02-p8391383	A02	1	100	50	0	0	1	50	7895539	7895490	1.7e-18	93.5
Bn-A02-p8391574	A02	1	100	50	0	0	1	50	7895630	7895679	1.7e-18	93.5
Bn-A02-p8412911	A02	1	100	47	0	0	4	50	7918467	7918421	7.93e-17	87.9
Bn-A02-p8440451	A02	1	100	50	0	0	1	50	7935917	7935966	1.7e-18	93.5
Bn-A02-p8443355	A02	1	98.039	51	0	1	1	50	7938838	7938888	7.93e-17	87.9
Bn-A02-p8466214	A02	1	100	50	0	0	1	50	7955999	7955950	1.7e-18	93.5
Bn-A02-p8471639	A02	1	100	50	0	0	1	50	7961898	7961849	1.7e-18	93.5
Bn-A02-p8472166	A02	1	100	50	0	0	1	50	7962325	7962374	1.7e-18	93.5
Bn-A02-p8473119	A02	1	100	50	0	0	1	50	7963281	7963330	1.7e-18	93.5
Bn-A02-p8481759	A02	1	100	50	0	0	1	50	7973645	7973596	1.7e-18	93.5
Bn-A02-p8501267	A02	1	100	50	0	0	1	50	8022774	8022725	1.7e-18	93.5
Bn-A02-p8509407	A02	1	100	50	0	0	1	50	8029263	8029214	1.7e-18	93.5
Bn-A02-p8509694	A02	1	100	50	0	0	1	50	8029450	8029499	1.7e-18	93.5
Bn-A02-p8513186	A02	1	98.039	51	0	1	1	50	8033028	8032978	7.93e-17	87.9
Bn-A02-p8517135	A02	1	100	50	0	0	1	50	8040706	8040755	1.7e-18	93.5
Bn-A02-p8530142	A02	1	100	50	0	0	1	50	8056353	8056304	1.7e-18	93.5
Bn-A02-p8538437	A02	1	100	50	0	0	1	50	8064871	8064822	1.7e-18	93.5
Bn-A02-p8549373	A02	1	100	50	0	0	1	50	8074610	8074659	1.7e-18	93.5
Bn-A02-p8549867	A02	1	100	50	0	0	1	50	8075128	8075177	1.7e-18	93.5
Bn-A02-p8554870	A02	1	100	50	0	0	1	50	8081799	8081750	1.7e-18	93.5
Bn-A02-p8561027	A02	1	100	50	0	0	1	50	8090730	8090779	1.7e-18	93.5
Bn-A02-p8560119	A02	1	100	50	0	0	1	50	8091635	8091684	1.7e-18	93.5
Bn-A02-p8559435	A02	1	100	50	0	0	1	50	8092417	8092368	1.7e-18	93.5
Bn-A02-p8570729	A02	1	100	50	0	0	1	50	8093827	8093778	1.7e-18	93.5
Bn-A02-p8571577	A02	1	100	50	0	0	1	50	8094582	8094631	1.7e-18	93.5
Bn-A02-p8575325	A02	1	100	50	0	0	1	50	8098465	8098416	1.7e-18	93.5
Bn-A02-p8621264	A02	1	100	50	0	0	1	50	8129737	8129688	1.7e-18	93.5
Bn-A02-p8633119	A02	1	100	50	0	0	1	50	8141471	8141520	1.7e-18	93.5
Bn-A02-p8634642	A02	1	100	46	0	0	5	50	8143099	8143054	2.85e-16	86.1
Bn-A02-p8637915	A02	1	100	50	0	0	1	50	8145828	8145877	1.7e-18	93.5
Bn-A02-p8660632	A02	1	100	50	0	0	1	50	8170348	8170397	1.7e-18	93.5
Bn-A02-p8663297	A02	1	100	50	0	0	1	50	8180272	8180321	1.7e-18	93.5
Bn-A02-p8676211	A02	1	100	50	0	0	1	50	8192255	8192304	1.7e-18	93.5
Bn-A02-p8678600	A02	1	100	50	0	0	1	50	8193910	8193861	1.7e-18	93.5
Bn-A02-p8682290	A02	1	100	50	0	0	1	50	8197601	8197552	1.7e-18	93.5
Bn-A02-p8703446	A02	1	100	50	0	0	1	50	8221565	8221516	1.7e-18	93.5
Bn-A02-p8711609	A02	1	100	50	0	0	1	50	8229713	8229664	1.7e-18	93.5
Bn-A02-p8724443	A02	1	100	50	0	0	1	50	8239452	8239501	1.7e-18	93.5
Bn-A02-p8726802	A02	1	100	50	0	0	1	50	8243830	8243879	1.7e-18	93.5
Bn-A02-p8732961	A02	1	100	49	0	0	2	50	8249578	8249626	6.13e-18	91.6
Bn-A02-p8735305	A02	1	100	50	0	0	1	50	8252037	8251988	1.7e-18	93.5
Bn-A02-p8747010	A02	1	98.039	51	0	1	1	50	8264255	8264205	7.93e-17	87.9
Bn-A02-p8767145	A02	1	100	50	0	0	1	50	8289933	8289982	1.7e-18	93.5
Bn-A02-p8777846	A02	1	100	50	0	0	1	50	8296865	8296816	1.7e-18	93.5
Bn-A02-p8799151	A02	1	100	50	0	0	1	50	8321208	8321257	1.7e-18	93.5
Bn-A02-p8802671	A02	1	100	50	0	0	1	50	8324723	8324772	1.7e-18	93.5
Bn-A02-p8833760	A02	1	100	50	0	0	1	50	8338550	8338501	1.7e-18	93.5
Bn-A02-p8834915	A02	1	100	50	0	0	1	50	8339705	8339656	1.7e-18	93.5
Bn-A02-p8836098	A02	1	100	50	0	0	1	50	8340888	8340839	1.7e-18	93.5
Bn-A02-p8865764	A02	1	100	50	0	0	1	50	8383469	8383420	1.7e-18	93.5
Bn-A02-p8865968	A02	1	100	50	0	0	1	50	8383675	8383626	1.7e-18	93.5
Bn-A02-p8867507	A02	1	100	50	0	0	1	50	8385275	8385226	1.7e-18	93.5
Bn-A02-p8867662	A02	1	100	50	0	0	1	50	8385330	8385379	1.7e-18	93.5
Bn-A02-p8872271	A02	1	98	50	0	1	1	50	8388069	8388021	2.85e-16	86.1
Bn-A02-p8873864	A02	1	100	50	0	0	1	50	8389585	8389634	1.7e-18	93.5
Bn-A02-p8873993	A02	1	100	50	0	0	1	50	8389715	8389764	1.7e-18	93.5
Bn-A02-p8874016	A02	1	100	50	0	0	1	50	8389838	8389789	1.7e-18	93.5
Bn-A02-p8874299	A02	1	100	50	0	0	1	50	8390033	8390082	1.7e-18	93.5
Bn-A02-p8874380	A02	1	100	50	0	0	1	50	8390220	8390171	1.7e-18	93.5
Bn-A02-p8877059	A02	1	100	50	0	0	1	50	8392634	8392585	1.7e-18	93.5
Bn-A02-p8877587	A02	1	100	50	0	0	1	50	8393073	8393122	1.7e-18	93.5
Bn-A02-p8877788	A02	1	100	50	0	0	1	50	8393276	8393325	1.7e-18	93.5
Bn-A02-p8880230	A02	1	100	50	0	0	1	50	8395724	8395773	1.7e-18	93.5
Bn-A02-p8880464	A02	1	100	50	0	0	1	50	8395958	8396007	1.7e-18	93.5
Bn-A02-p8881070	A02	1	100	50	0	0	1	50	8396673	8396624	1.7e-18	93.5
Bn-A02-p8881251	A02	1	100	50	0	0	1	50	8396851	8396802	1.7e-18	93.5
Bn-A02-p8883792	A02	1	100	50	0	0	1	50	8397745	8397794	1.7e-18	93.5
Bn-A02-p8884242	A02	1	100	50	0	0	1	50	8398303	8398254	1.7e-18	93.5
Bn-A02-p8884712	A02	1	100	50	0	0	1	50	8398675	8398724	1.7e-18	93.5
Bn-A02-p8885004	A02	1	100	50	0	0	1	50	8398967	8399016	1.7e-18	93.5
Bn-A02-p8885209	A02	1	100	50	0	0	1	50	8399271	8399222	1.7e-18	93.5
Bn-A02-p8885908	A02	1	100	50	0	0	1	50	8399968	8399919	1.7e-18	93.5
Bn-A02-p8886238	A02	1	100	50	0	0	1	50	8400199	8400248	1.7e-18	93.5
Bn-A02-p8891703	A02	1	100	50	0	0	1	50	8401592	8401543	1.7e-18	93.5
Bn-A02-p8893096	A02	1	100	50	0	0	1	50	8402872	8402921	1.7e-18	93.5
Bn-A02-p8893045	A02	1	100	50	0	0	1	50	8402921	8402872	1.7e-18	93.5
Bn-A02-p8895388	A02	1	100	50	0	0	1	50	8404265	8404314	1.7e-18	93.5
Bn-A02-p8912747	A02	1	100	50	0	0	1	50	8421027	8421076	1.7e-18	93.5
Bn-A02-p8924447	A02	1	100	50	0	0	1	50	8448356	8448405	1.7e-18	93.5
Bn-A02-p8934314	A02	1	100	50	0	0	1	50	8452636	8452587	1.7e-18	93.5
Bn-A02-p8934537	A02	1	100	50	0	0	1	50	8452759	8452808	1.7e-18	93.5
Bn-A02-p8937580	A02	1	100	50	0	0	1	50	8455812	8455861	1.7e-18	93.5
Bn-A02-p8950348	A02	1	100	50	0	0	1	50	8468689	8468640	1.7e-18	93.5
Bn-A02-p8954851	A02	1	100	50	0	0	1	50	8472995	8473044	1.7e-18	93.5
Bn-A02-p8955992	A02	1	100	50	0	0	1	50	8474235	8474186	1.7e-18	93.5
Bn-A02-p9000565	A02	1	100	50	0	0	1	50	8542084	8542035	1.7e-18	93.5
Bn-A02-p9000921	A02	1	100	50	0	0	1	50	8542440	8542391	1.7e-18	93.5
Bn-A02-p9000998	A02	1	100	50	0	0	1	50	8542517	8542468	1.7e-18	93.5
Bn-A02-p9064726	A02	1	100	50	0	0	1	50	8605547	8605596	1.7e-18	93.5
Bn-A02-p9071076	A02	1	100	50	0	0	1	50	8610925	8610974	1.7e-18	93.5
Bn-A02-p9135710	A02	1	100	50	0	0	1	50	8655311	8655262	1.7e-18	93.5
Bn-A02-p9148801	A02	1	100	50	0	0	1	50	8668473	8668522	1.7e-18	93.5
Bn-A02-p9187768	A02	1	100	50	0	0	1	50	8717924	8717875	1.7e-18	93.5
Bn-A02-p9223722	A02	1	100	50	0	0	1	50	8751880	8751929	1.7e-18	93.5
Bn-A02-p9224016	A02	1	100	50	0	0	1	50	8752174	8752223	1.7e-18	93.5
Bn-A02-p9231115	A02	1	100	50	0	0	1	50	8759366	8759317	1.7e-18	93.5
Bn-A02-p9239879	A02	1	100	50	0	0	1	50	8770197	8770246	1.7e-18	93.5
Bn-A02-p9240182	A02	1	100	50	0	0	1	50	8770500	8770549	1.7e-18	93.5
Bn-A02-p9246552	A02	1	100	50	0	0	1	50	8776875	8776924	1.7e-18	93.5
Bn-A02-p9255686	A02	1	100	50	0	0	1	50	8783667	8783618	1.7e-18	93.5
Bn-A02-p9258117	A02	1	98	50	0	1	1	50	8786107	8786059	2.85e-16	86.1
Bn-A02-p9259325	A02	1	100	50	0	0	1	50	8787214	8787263	1.7e-18	93.5
Bn-A02-p9281731	A02	1	100	50	0	0	1	50	8815155	8815204	1.7e-18	93.5
[truncated: 32,081 more rows]

## Sheet: S2
Supplementary Table S2 Functional gene annotation of the reference genome assembly Darmor-bzh version 10 (AHRD-Version 3.11)
Protein-Accession	Chromosome	Start position	End position	No. of exons	AHRD-Quality-Code	Human-Readable-Description	Gene-Ontology-Term	Gene-Ontology-ID
A01p00010.1_BnaDAR	A01	358	1313	1	*-*	Piezo-type mechanosensitive ion channel homolog	ion transport; biological_process; membrane; integral component of membrane	GO:0006811, GO:0008150, GO:0016020, GO:0016021
A01p00020.1_BnaDAR	A01	1351	2505	3	***	Expansin-like	extracellular region; sexual reproduction	GO:0005576, GO:0019953
A01p00030.1_BnaDAR	A01	3679	5038	2	***	Geranylgeranyl pyrophosphate synthase	isoprenoid biosynthetic process; transferase activity	GO:0008299, GO:0016740
A01p00040.1_BnaDAR	A01	9617	13540	15	***	Kinase family protein	protein kinase activity; protein serine/threonine kinase activity; protein serine/threonine/tyrosine kinase activity; ATP binding; cytosol; protein phosphorylation; chloroplast organization; response to abscisic acid; kinase activity; phosphorylation	GO:0004672, GO:0004674, GO:0004712, GO:0005524, GO:0005829, GO:0006468, GO:0009658, GO:0009737, GO:0016301, GO:0016310
A01p00050.1_BnaDAR	A01	13398	14089	3	***	INO80 complex subunit C	nucleus; chromatin remodeling; Ino80 complex	GO:0005634, GO:0006338, GO:0031011
A01p00060.1_BnaDAR	A01	14808	16914	3	***	Thaumatin-like protein	membrane; integral component of membrane	GO:0016020, GO:0016021
A01p00070.1_BnaDAR	A01	17814	18584	2	--*	Dynein-1-beta heavy chain, flagellar inner arm I1 complex	nucleotide binding; motor activity; microtubule motor activity; ATP binding; cytoplasm; cytoskeleton; microtubule; cilium; axoneme; microtubule-based movement; microtubule binding; ATP-dependent microtubule motor activity, minus-end-directed; cell projection organization; dynein complex; motile cilium; inner dynein arm; inner dynein arm assembly; cell projection; cilium movement involved in cell …	GO:0000166, GO:0003774, GO:0003777, GO:0005524, GO:0005737, GO:0005856, GO:0005874, GO:0005929, GO:0005930, GO:0007018, GO:0008017, GO:0008569, GO:0030030, GO:0030286, GO:0031514, GO:0036156, GO:0036159, GO:0042995, GO:0060294
A01p00080.1_BnaDAR	A01	45758	46339	1	***	Dirigent protein	extracellular region; apoplast	GO:0005576, GO:0048046
A01p00090.1_BnaDAR	A01	50053	51193	3	*-*	Proline-rich protein 4	extracellular region; cell wall	GO:0005576, GO:0005618
A01p00100.1_BnaDAR	A01	56559	57884	1	*--	BnaA02g33780D protein	oxidoreductase activity; metal ion binding; oxidation-reduction process	GO:0016491, GO:0046872, GO:0055114
A01p00110.1_BnaDAR	A01	61613	61930	1	***	Auxin-induced protein	response to auxin	GO:0009733
A01p00120.1_BnaDAR	A01	66788	68419	1	***	Amidophosphoribosyltransferase	amidophosphoribosyltransferase activity; cytoplasm; purine nucleotide biosynthetic process; ""'de novo' IMP biosynthetic process; purine nucleobase biosynthetic process; nucleoside metabolic process; transferase activity; transferase activity, transferring glycosyl groups; metal ion binding; iron-sulfur cluster binding	GO:0004044, GO:0005737, GO:0006164, GO:0006189, GO:0009113, GO:0009116, GO:0016740, GO:0016757, GO:0046872, GO:0051536
A01p00130.1_BnaDAR	A01	68552	71532	10	***	tRNA-dihydrouridine(47) synthase [NAD(P)(+)]	tRNA dihydrouridine synthesis; catalytic activity; tRNA processing; oxidoreductase activity; tRNA dihydrouridine synthase activity; metal ion binding; flavin adenine dinucleotide binding; oxidation-reduction process	GO:0002943, GO:0003824, GO:0008033, GO:0016491, GO:0017150, GO:0046872, GO:0050660, GO:0055114
A01p00140.1_BnaDAR	A01	73088	79014	16	***	Kinesin-like protein	nucleotide binding; motor activity; microtubule motor activity; ATP binding; microtubule; microtubule-based movement; microtubule binding	GO:0000166, GO:0003774, GO:0003777, GO:0005524, GO:0005874, GO:0007018, GO:0008017
A01p00150.1_BnaDAR	A01	82440	84648	7	***	Fructose-bisphosphate aldolase	catalytic activity; fructose-bisphosphate aldolase activity; cytosol; glycolytic process; lyase activity; fructose 1,6-bisphosphate metabolic process	GO:0003824, GO:0004332, GO:0005829, GO:0006096, GO:0016829, GO:0030388
A01p00160.1_BnaDAR	A01	90519	92825	5	***	Endoglucanase	polysaccharide catabolic process; hydrolase activity, hydrolyzing O-glycosyl compounds; carbohydrate metabolic process; metabolic process; cellulase activity; plant-type cell wall loosening; fruit dehiscence; hydrolase activity; hydrolase activity, acting on glycosyl bonds; cellulose catabolic process; cell wall organization; fruit valve development	GO:0000272, GO:0004553, GO:0005975, GO:0008152, GO:0008810, GO:0009828, GO:0010047, GO:0016787, GO:0016798, GO:0030245, GO:0071555, GO:1990059
A01p00170.1_BnaDAR	A01	94450	97416	5	***	Endoglucanase	polysaccharide catabolic process; hydrolase activity, hydrolyzing O-glycosyl compounds; carbohydrate metabolic process; metabolic process; cellulase activity; hydrolase activity; hydrolase activity, acting on glycosyl bonds; cellulose catabolic process; cell wall organization	GO:0000272, GO:0004553, GO:0005975, GO:0008152, GO:0008810, GO:0016787, GO:0016798, GO:0030245, GO:0071555
A01p00180.1_BnaDAR	A01	111804	114943	11	***	Protein DETOXIFICATION	mitochondrion; plastid; salicylic acid biosynthetic process; response to salicylic acid; chloroplast envelope; antiporter activity; membrane; integral component of membrane; negative regulation of defense response; defense response to bacterium; xenobiotic transport; xenobiotic transmembrane transporter activity; innate immune response; transmembrane transport	GO:0005739, GO:0009536, GO:0009697, GO:0009751, GO:0009941, GO:0015297, GO:0016020, GO:0016021, GO:0031348, GO:0042742, GO:0042908, GO:0042910, GO:0045087, GO:0055085
A01p00190.1_BnaDAR	A01	116502	117980	2	*-*	Zinc finger, B-box	zinc ion binding	GO:0008270
A01p00200.1_BnaDAR	A01	121693	126520	18	***	V-type proton ATPase subunit a	vacuolar proton-transporting V-type ATPase, V0 domain; ion transport; vacuolar acidification; proton transmembrane transporter activity; membrane; integral component of membrane; vacuolar proton-transporting V-type ATPase complex; proton-transporting V-type ATPase, V0 domain; proton-transporting ATPase activity, rotational mechanism; ATPase binding; proton transmembrane transport	GO:0000220, GO:0006811, GO:0007035, GO:0015078, GO:0016020, GO:0016021, GO:0016471, GO:0033179, GO:0046961, GO:0051117, GO:1902600
A01p00210.1_BnaDAR	A01	128575	129905	3	***	Cysteine proteinase	proteolysis; peptidase activity; cysteine-type peptidase activity; hydrolase activity	GO:0006508, GO:0008233, GO:0008234, GO:0016787
A01p00220.1_BnaDAR	A01	131776	132217	2	*-*	Aspartate carbamoyltransferase	transferase activity	GO:0016740
A01p00230.1_BnaDAR	A01	133293	135989	1	***	Kinase family protein	nucleotide binding; protein kinase activity; protein serine/threonine kinase activity; ATP binding; protein phosphorylation; chloroplast; membrane; integral component of membrane; kinase activity; phosphorylation; apical plasma membrane; transferase activity; regulation of pollen tube growth	GO:0000166, GO:0004672, GO:0004674, GO:0005524, GO:0006468, GO:0009507, GO:0016020, GO:0016021, GO:0016301, GO:0016310, GO:0016324, GO:0016740, GO:0080092
A01p00240.1_BnaDAR	A01	136278	137338	5	*-*	Histidinol-phosphatase	histidine biosynthetic process; histidinol-phosphatase activity; cellular amino acid biosynthetic process; phosphoric ester hydrolase activity; inositol phosphate dephosphorylation; metal ion binding	GO:0000105, GO:0004401, GO:0008652, GO:0042578, GO:0046855, GO:0046872
A01p00250.1_BnaDAR	A01	137557	138159	2	***	Dehydrin family protein	molecular_function; cytosol; response to water deprivation; response to water; cold acclimation; response to abscisic acid	GO:0003674, GO:0005829, GO:0009414, GO:0009415, GO:0009631, GO:0009737
A01p00260.1_BnaDAR	A01	138296	140972	6	***	RING/U-box superfamily protein	metal ion binding	GO:0046872
A01p00270.1_BnaDAR	A01	141730	144007	9	***	Chaperone protein dnaJ 10	response to water	GO:0009415
A01p00280.1_BnaDAR	A01	144355	145205	3	***	40S ribosomal protein S25-like	ribosome	GO:0005840
A01p00290.1_BnaDAR	A01	145831	146255	1	***	Protein RADIALIS-like	nucleus	GO:0005634
A01p00300.1_BnaDAR	A01	148878	149870	2	*-*	RNA-binding protein	nucleic acid binding; RNA binding	GO:0003676, GO:0003723
A01p00310.1_BnaDAR	A01	151140	152410	3	--*	protein NUCLEAR FUSION DEFECTIVE 6, chloroplastic/mitochondrial	mitochondrion	GO:0005739
A01p00320.1_BnaDAR	A01	153360	153902	2	***	BnaC01g00300D protein	oxidoreductase activity, acting on the CH-OH group of donors, NAD or NADP as acceptor; oxidation-reduction process	GO:0016616, GO:0055114
A01p00330.1_BnaDAR	A01	162301	167440	12	***	Cellulose synthase	Golgi apparatus; trans-Golgi network; plasma membrane; plant-type primary cell wall biogenesis; membrane; integral component of membrane; transferase activity; transferase activity, transferring glycosyl groups; cellulose synthase activity; cellulose synthase (UDP-forming) activity; cellulose biosynthetic process; metal ion binding; cell wall organization	GO:0005794, GO:0005802, GO:0005886, GO:0009833, GO:0016020, GO:0016021, GO:0016740, GO:0016757, GO:0016759, GO:0016760, GO:0030244, GO:0046872, GO:0071555
A01p00340.1_BnaDAR	A01	168621	168962	1	***	At4g39360	biological_process	GO:0008150
A01p00350.1_BnaDAR	A01	172862	174907	5	***	UDP-galactose transporter 2	membrane; integral component of membrane	GO:0016020, GO:0016021
A01p00360.1_BnaDAR	A01	181271	184855	1	***	Receptor kinase	nucleotide binding; protein kinase activity; protein serine/threonine kinase activity; ATP binding; plasma membrane; protein phosphorylation; hormone-mediated signaling pathway; membrane; integral component of membrane; kinase activity; phosphorylation; transferase activity	GO:0000166, GO:0004672, GO:0004674, GO:0005524, GO:0005886, GO:0006468, GO:0009755, GO:0016020, GO:0016021, GO:0016301, GO:0016310, GO:0016740
A01p00370.1_BnaDAR	A01	193198	195358	3	*-*	WRKY transcription factor	DNA binding; DNA-binding transcription factor activity; nucleus; regulation of transcription, DNA-templated; sequence-specific DNA binding	GO:0003677, GO:0003700, GO:0005634, GO:0006355, GO:0043565
A01p00380.1_BnaDAR	A01	202104	217286	25	***	BnaA01g05510D protein	cytoplasm	GO:0005737
A01p00390.1_BnaDAR	A01	218277	219788	1	***	Cytochrome p450-like protein	monooxygenase activity; iron ion binding; membrane; integral component of membrane; oxidoreductase activity; oxidoreductase activity, acting on paired donors, with incorporation or reduction of molecular oxygen; heme binding; metal ion binding; oxidation-reduction process	GO:0004497, GO:0005506, GO:0016020, GO:0016021, GO:0016491, GO:0016705, GO:0020037, GO:0046872, GO:0055114
A01p00400.1_BnaDAR	A01	220366	223329	10	***	Developmentally-regulated GTP-binding protein 1	nucleotide binding; GTP binding	GO:0000166, GO:0005525
A01p00410.1_BnaDAR	A01	223637	224972	12	*-*	Shikimate kinase 2, chloroplastic	nucleotide binding; shikimate kinase activity; ATP binding; cellular amino acid biosynthetic process; chorismate biosynthetic process; kinase activity; phosphorylation; transferase activity	GO:0000166, GO:0004765, GO:0005524, GO:0008652, GO:0009423, GO:0016301, GO:0016310, GO:0016740
A01p00420.1_BnaDAR	A01	225015	226427	8	***	Shikimate kinase family protein	nucleotide binding; shikimate kinase activity; ATP binding; cellular amino acid biosynthetic process; chorismate biosynthetic process; kinase activity; phosphorylation; transferase activity; shikimate metabolic process	GO:0000166, GO:0004765, GO:0005524, GO:0008652, GO:0009423, GO:0016301, GO:0016310, GO:0016740, GO:0019632
A01p00430.1_BnaDAR	A01	226474	227565	1	***	Kelch repeat-containing F-box family protein	ubiquitin-dependent protein catabolic process	GO:0006511
A01p00440.1_BnaDAR	A01	227878	229451	1	***	Kelch repeat-containing F-box family protein	ubiquitin-dependent protein catabolic process	GO:0006511
A01p00450.1_BnaDAR	A01	230337	231493	2	***	F-box/kelch-repeat protein At4g39550	protein ubiquitination	GO:0016567
A01p00460.1_BnaDAR	A01	232322	233560	1	***	Kelch repeat-containing F-box family protein	ubiquitin-dependent protein catabolic process	GO:0006511
A01p00470.1_BnaDAR	A01	235037	244788	3	***	Kelch repeat-containing F-box family protein	ubiquitin-dependent protein catabolic process	GO:0006511
A01p00480.1_BnaDAR	A01	239053	240068	5	*-*	Mitogen-activated protein kinase	MAPK cascade; protein kinase activity; protein serine/threonine kinase activity; MAP kinase activity; ATP binding; protein phosphorylation; kinase activity; phosphorylation; transferase activity	GO:0000165, GO:0004672, GO:0004674, GO:0004707, GO:0005524, GO:0006468, GO:0016301, GO:0016310, GO:0016740
A01p00490.1_BnaDAR	A01	245429	250161	4	***	Coatomer subunit alpha	Golgi membrane; structural molecule activity; cytoplasm; Golgi apparatus; intracellular protein transport; protein transport; membrane; vesicle-mediated transport; membrane coat; COPI vesicle coat; cytoplasmic vesicle	GO:0000139, GO:0005198, GO:0005737, GO:0005794, GO:0006886, GO:0015031, GO:0016020, GO:0016192, GO:0030117, GO:0030126, GO:0031410
A01p00500.1_BnaDAR	A01	250748	251418	2	-**	Transmembrane protein	integral component of membrane	GO:0016021
A01p00510.1_BnaDAR	A01	251942	254358	2	***	Pentatricopeptide repeat-containing protein	methyltransferase activity; transferase activity; methylation	GO:0008168, GO:0016740, GO:0032259
A01p00520.1_BnaDAR	A01	255759	258466	6	***	Gamma-glutamyltranspeptidase 1	proteolysis; glutathione catabolic process; glutathione hydrolase activity	GO:0006508, GO:0006751, GO:0036374
A01p00530.1_BnaDAR	A01	259052	259735	2	*-*	Translation initiation factor	translation initiation factor activity; translational initiation	GO:0003743, GO:0006413
A01p00540.1_BnaDAR	A01	260678	263326	6	***	Gamma-glutamyltranspeptidase 1	proteolysis; glutathione catabolic process; glutathione hydrolase activity	GO:0006508, GO:0006751, GO:0036374
A01p00550.1_BnaDAR	A01	265832	268410	9	***	Alanine:glyoxylate aminotransferase 2 homolog	catalytic activity; transaminase activity; transferase activity; pyridoxal phosphate binding	GO:0003824, GO:0008483, GO:0016740, GO:0030170
A01p00560.1_BnaDAR	A01	271894	272195	1	--*	Lon protease	nucleotide binding; ATP-dependent peptidase activity; serine-type endopeptidase activity; ATP binding; cytoplasm; proteolysis; protein quality control for misfolded or incompletely synthesized proteins; peptidase activity; serine-type peptidase activity; hydrolase activity; ATPase activity; protein catabolic process; cellular response to heat; sequence-specific DNA binding	GO:0000166, GO:0004176, GO:0004252, GO:0005524, GO:0005737, GO:0006508, GO:0006515, GO:0008233, GO:0008236, GO:0016787, GO:0016887, GO:0030163, GO:0034605, GO:0043565
A01p00570.1_BnaDAR	A01	272260	274817	5	***	Apoptotic chromatin condensation inducer in the nucleus	nucleic acid binding	GO:0003676
A01p00580.1_BnaDAR	A01	275117	276843	8	*-*	MICOS complex subunit MIC60	mitochondrial inner membrane; membrane	GO:0005743, GO:0016020
A01p00590.1_BnaDAR	A01	279809	280560	2	***	Heavy metal-associated isoprenylated plant protein	metal ion transport; metal ion binding	GO:0030001, GO:0046872
A01p00600.1_BnaDAR	A01	281408	282858	5	***	Peptidylprolyl isomerase	protein peptidyl-prolyl isomerization; peptidyl-prolyl cis-trans isomerase activity; chloroplast; isomerase activity	GO:0000413, GO:0003755, GO:0009507, GO:0016853
A01p00610.1_BnaDAR	A01	284385	285947	1	*-*	VQ motif-containing protein	biological_process	GO:0008150
A01p00620.1_BnaDAR	A01	295605	296988	7	***	Protein SCO1 homolog 2, mitochondrial	molecular_function; mitochondrion; mitochondrial inner membrane; membrane; integral component of membrane; mitochondrial cytochrome c oxidase assembly; copper ion homeostasis	GO:0003674, GO:0005739, GO:0005743, GO:0016020, GO:0016021, GO:0033617, GO:0055070
A01p00630.1_BnaDAR	A01	297246	298310	1	***	F-box/kelch-repeat protein At4g19330	response to cold; seed germination	GO:0009409, GO:0009845
A01p00640.1_BnaDAR	A01	303990	306252	11	***	Trehalose 6-phosphate phosphatase	catalytic activity; trehalose-phosphatase activity; trehalose biosynthetic process; dephosphorylation; hydrolase activity	GO:0003824, GO:0004805, GO:0005992, GO:0016311, GO:0016787
A01p00650.1_BnaDAR	A01	315558	316636	1	***	RNA-directed DNA polymerase (Reverse transcriptase)-related family protein	RNA-directed DNA polymerase activity; cellular_component; RNA-dependent DNA biosynthetic process; biological_process	GO:0003964, GO:0005575, GO:0006278, GO:0008150
A01p00660.1_BnaDAR	A01	319944	322339	1	***	Ethylene-responsive transcription factor ERF060	DNA binding; DNA-binding transcription factor activity; protein binding; nucleus; regulation of transcription, DNA-templated; ethylene-activated signaling pathway; sequence-specific DNA binding	GO:0003677, GO:0003700, GO:0005515, GO:0005634, GO:0006355, GO:0009873, GO:0043565
A01p00670.1_BnaDAR	A01	325654	328317	5	***	BZIP transcription factor, putative (DUF630 and DUF632)	molecular_function	GO:0003674
A01p00680.1_BnaDAR	A01	328703	329187	1		Unknown protein	0
A01p00690.1_BnaDAR	A01	331236	331579	1	--*	N-6 DNA methylase	DNA binding; DNA methylation; methyltransferase activity; N-methyltransferase activity; site-specific DNA-methyltransferase (adenine-specific) activity; transferase activity; methylation; DNA methylation on adenine	GO:0003677, GO:0006306, GO:0008168, GO:0008170, GO:0009007, GO:0016740, GO:0032259, GO:0032775
A01p00700.1_BnaDAR	A01	331601	332903	1	*-*	BZIP transcription factor, putative (DUF630 and DUF632)	molecular_function	GO:0003674
A01p00710.1_BnaDAR	A01	335598	336298	2	*-*	DUF581 family protein, putative (DUF581)	P-body; cytoplasm; biological_process; metal ion binding	GO:0000932, GO:0005737, GO:0008150, GO:0046872
A01p00720.1_BnaDAR	A01	337608	341215	10	***	Inositol-3-phosphate synthase 1	inositol-3-phosphate synthase activity; cytoplasm; inositol biosynthetic process; lipid metabolic process; phospholipid biosynthetic process; isomerase activity	GO:0004512, GO:0005737, GO:0006021, GO:0006629, GO:0008654, GO:0016853
A01p00730.1_BnaDAR	A01	342643	344012	5	*-*	Exonuclease, DNA polymerase III, epsilon subunit family	nucleic acid binding; exonuclease activity; 3'-5' exonuclease activity; nucleic acid phosphodiester bond hydrolysis	GO:0003676, GO:0004527, GO:0008408, GO:0090305
A01p00740.1_BnaDAR	A01	344947	350566	2	***	trafficking protein particle complex subunit 12-like	endopeptidase activity; proteolysis	GO:0004175, GO:0006508
A01p00750.1_BnaDAR	A01	353428	355170	1	***	Cell wall integrity/stress response component-like protein	endosome; Golgi apparatus; trans-Golgi network; biological_process; membrane; integral component of membrane	GO:0005768, GO:0005794, GO:0005802, GO:0008150, GO:0016020, GO:0016021
A01p00760.1_BnaDAR	A01	356140	357948	5	***	Alpha-ketoglutarate-dependent dioxygenase alkB-like protein 2	dioxygenase activity; oxidation-reduction process	GO:0051213, GO:0055114
A01p00770.1_BnaDAR	A01	358573	360334	8	*-*	oxidation resistance protein 1	membrane; integral component of membrane	GO:0016020, GO:0016021
A01p00780.1_BnaDAR	A01	360773	361618	1	***	50S ribosomal protein L23	structural constituent of ribosome; ribosome; translation	GO:0003735, GO:0005840, GO:0006412
A01p00790.1_BnaDAR	A01	361772	363532	7	***	BnaA01g34640D protein	membrane; integral component of membrane	GO:0016020, GO:0016021
A01p00800.1_BnaDAR	A01	364561	365288	3	---	Transcription factor Sox-6	transcription regulatory region sequence-specific DNA binding; cartilage condensation; chondrocyte differentiation; DNA binding; nucleus; regulation of transcription, DNA-templated; multicellular organism development; central nervous system development; cell differentiation; positive regulation of chondrocyte differentiation; cell fate commitment; negative regulation of transcription, DNA-templat…	GO:0000976, GO:0001502, GO:0002062, GO:0003677, GO:0005634, GO:0006355, GO:0007275, GO:0007417, GO:0030154, GO:0032332, GO:0045165, GO:0045892, GO:0045944, GO:0051216
A01p00810.1_BnaDAR	A01	365636	367987	6	***	Ubiquitin carboxyl-terminal hydrolase, putative	cysteine-type endopeptidase activity; thiol-dependent ubiquitin-specific protease activity; nucleus; cytosol; proteolysis; ubiquitin-dependent protein catabolic process; peptidase activity; cysteine-type peptidase activity; protein deubiquitination; hydrolase activity	GO:0004197, GO:0004843, GO:0005634, GO:0005829, GO:0006508, GO:0006511, GO:0008233, GO:0008234, GO:0016579, GO:0016787
A01p00820.1_BnaDAR	A01	368970	370790	6	***	Adenylyl-sulfate kinase	sulfate assimilation; nucleotide binding; adenylylsulfate kinase activity; ATP binding; kinase activity; phosphorylation; transferase activity; hydrogen sulfide biosynthetic process	GO:0000103, GO:0000166, GO:0004020, GO:0005524, GO:0016301, GO:0016310, GO:0016740, GO:0070814
A01p00830.1_BnaDAR	A01	375693	377706	2	***	Cytochrome P450 79B1	monooxygenase activity; iron ion binding; membrane; integral component of membrane; oxidoreductase activity; oxidoreductase activity, acting on paired donors, with incorporation or reduction of molecular oxygen; heme binding; metal ion binding; oxidation-reduction process	GO:0004497, GO:0005506, GO:0016020, GO:0016021, GO:0016491, GO:0016705, GO:0020037, GO:0046872, GO:0055114
A01p00840.1_BnaDAR	A01	378136	380472	1	***	Pentatricopeptide repeat-containing protein At4g39952, mitochondrial	mitochondrion	GO:0005739
A01p00850.1_BnaDAR	A01	381561	382174	1	--*	KNOTTED1-like homeobox gene 3	0
A01p00860.1_BnaDAR	A01	382249	385191	8	***	Chaperone protein DnaJ	ATP binding; protein folding; response to heat; heat shock protein binding; metal ion binding; unfolded protein binding	GO:0005524, GO:0006457, GO:0009408, GO:0031072, GO:0046872, GO:0051082
A01p00870.1_BnaDAR	A01	385622	386100	2	--*	Mitochondrial nuclease	single-stranded DNA endodeoxyribonuclease activity; DNA catabolic process, endonucleolytic; nucleic acid binding; nuclease activity; endonuclease activity; endodeoxyribonuclease activity; endoribonuclease activity; exodeoxyribonuclease activity; ribonuclease activity; nucleus; mitochondrion; mitochondrial inner membrane; cytosol; DNA catabolic process; apoptotic DNA fragmentation; DNA recombinati…	GO:0000014, GO:0000737, GO:0003676, GO:0004518, GO:0004519, GO:0004520, GO:0004521, GO:0004529, GO:0004540, GO:0005634, GO:0005739, GO:0005743, GO:0005829, GO:0006308, GO:0006309, GO:0006310, GO:0006401, GO:0006915, GO:0016020, GO:0016787, GO:0046872, GO:0051607, GO:0090501, GO:0090502
A01p00880.1_BnaDAR	A01	388828	390756	5	***	Phospho-2-dehydro-3-deoxyheptonate aldolase	catalytic activity; 3-deoxy-7-phosphoheptulonate synthase activity; cellular amino acid biosynthetic process; aromatic amino acid family biosynthetic process; chorismate biosynthetic process; chloroplast; plastid; transferase activity	GO:0003824, GO:0003849, GO:0008652, GO:0009073, GO:0009423, GO:0009507, GO:0009536, GO:0016740
A01p00890.1_BnaDAR	A01	392394	393308	2	***	Ras-related protein like	GTPase activity; GTP binding	GO:0003924, GO:0005525
A01p00900.1_BnaDAR	A01	393653	394612	3	*-*	tRNA (Cytosine(34)-C(5))-methyltransferase	tRNA binding; RNA methylation; RNA binding; nucleus; tRNA processing; methyltransferase activity; tRNA (cytosine-5-)-methyltransferase activity; transferase activity; tRNA methylation; methylation	GO:0000049, GO:0001510, GO:0003723, GO:0005634, GO:0008033, GO:0008168, GO:0016428, GO:0016740, GO:0030488, GO:0032259
A01p00910.1_BnaDAR	A01	394662	395213	3	--*	rRNA-processing protein FCF1-like protein	nucleolus; rRNA processing; small-subunit processome; ribosome biogenesis	GO:0005730, GO:0006364, GO:0032040, GO:0042254
A01p00920.1_BnaDAR	A01	397393	400785	15	***	tRNA (Cytosine(34)-C(5))-methyltransferase	tRNA binding; RNA methylation; RNA binding; nucleus; tRNA processing; methyltransferase activity; tRNA (cytosine-5-)-methyltransferase activity; transferase activity; tRNA methylation; methylation	GO:0000049, GO:0001510, GO:0003723, GO:0005634, GO:0008033, GO:0008168, GO:0016428, GO:0016740, GO:0030488, GO:0032259
A01p00930.1_BnaDAR	A01	401338	404103	9	***	Sucrose non-fermenting 1-related protein kinase 2	nucleotide binding; protein kinase activity; protein serine/threonine kinase activity; ATP binding; protein phosphorylation; kinase activity; phosphorylation; transferase activity	GO:0000166, GO:0004672, GO:0004674, GO:0005524, GO:0006468, GO:0016301, GO:0016310, GO:0016740
A01p00940.1_BnaDAR	A01	405884	407647	1	***	BnaAnng26740D protein	reciprocal meiotic recombination	GO:0007131
A01p00950.1_BnaDAR	A01	408559	409508	5	***	Histone H3	nucleosome; DNA binding; nucleus; chromosome; protein heterodimerization activity	GO:0000786, GO:0003677, GO:0005634, GO:0005694, GO:0046982
A01p00960.1_BnaDAR	A01	409847	410498	2	***	Signal peptidase complex subunit 1	endoplasmic reticulum; signal peptidase complex; endoplasmic reticulum membrane; signal peptide processing; membrane; integral component of membrane	GO:0005783, GO:0005787, GO:0005789, GO:0006465, GO:0016020, GO:0016021
A01p00970.1_BnaDAR	A01	410670	411191	1	***	Transmembrane protein	biological_process; membrane; integral component of membrane	GO:0008150, GO:0016020, GO:0016021
A01p00980.1_BnaDAR	A01	411701	414549	9	***	Protein SCAI	transcription corepressor activity; transcription, DNA-templated; negative regulation of nucleic acid-templated transcription	GO:0003714, GO:0006351, GO:1903507
A01p00990.1_BnaDAR	A01	417446	418648	1	***	F-box/kelch-repeat protein SKIP6	protein ubiquitination	GO:0016567
A01p01000.1_BnaDAR	A01	423254	424918	3	***	Homeobox-leucine zipper protein ATHB-16	DNA-binding transcription factor activity, RNA polymerase II-specific; DNA binding; DNA-binding transcription factor activity; nucleus; regulation of transcription, DNA-templated; regulation of transcription by RNA polymerase II; response to blue light; negative regulation of cell growth; sequence-specific DNA binding; positive regulation of transcription, DNA-templated; regulation of timing of t…	GO:0000981, GO:0003677, GO:0003700, GO:0005634, GO:0006355, GO:0006357, GO:0009637, GO:0030308, GO:0043565, GO:0045893, GO:0048510, GO:0048573
A01p01010.1_BnaDAR	A01	427231	428725	2	***	ENTH/ANTH/VHS superfamily protein, putative	SNARE binding; phospholipid binding; 1-phosphatidylinositol binding; phosphatidylinositol-4,5-bisphosphate binding; Golgi apparatus; plasma membrane; clathrin-coated pit; endocytosis; vesicle budding from membrane; clathrin-coated vesicle; cytoplasmic vesicle; clathrin heavy chain binding; clathrin-dependent endocytosis	GO:0000149, GO:0005543, GO:0005545, GO:0005546, GO:0005794, GO:0005886, GO:0005905, GO:0006897, GO:0006900, GO:0030136, GO:0031410, GO:0032050, GO:0072583
A01p01020.1_BnaDAR	A01	428823	429554	1	***	Classical arabinogalactan protein 3	plasma membrane; multicellular organism development; membrane; anchored component of membrane	GO:0005886, GO:0007275, GO:0016020, GO:0031225
A01p01030.1_BnaDAR	A01	433805	435352	2	--*	D-alanine--D-alanyl carrier protein ligase	nucleotide binding; ATP binding; cytoplasm; ligase activity; D-alanine [D-alanyl carrier protein] ligase activity; lipoteichoic acid biosynthetic process	GO:0000166, GO:0005524, GO:0005737, GO:0016874, GO:0047473, GO:0070395
A01p01040.1_BnaDAR	A01	435940	439077	8	***	Nucleobase-ascorbate transporter like	membrane; integral component of membrane; transmembrane transporter activity; transmembrane transport	GO:0016020, GO:0016021, GO:0022857, GO:0055085
A01p01050.1_BnaDAR	A01	439004	440817	5	***	Exostosin family protein	Golgi trans cisterna; Golgi membrane; endosome; Golgi apparatus; trans-Golgi network; protein glycosylation; membrane; integral component of membrane; transferase activity; transferase activity, transferring glycosyl groups	GO:0000138, GO:0000139, GO:0005768, GO:0005794, GO:0005802, GO:0006486, GO:0016020, GO:0016021, GO:0016740, GO:0016757
A01p01060.1_BnaDAR	A01	443038	446560	12	***	Rhamnogalacturonate lyase family protein	catalytic activity; extracellular region; carbohydrate metabolic process; lyase activity; carbohydrate binding; rhamnogalacturonan endolyase activity	GO:0003824, GO:0005576, GO:0005975, GO:0016829, GO:0030246, GO:0102210
A01p01070.1_BnaDAR	A01	446818	448273	4	***	tRNA/rRNA methyltransferase family protein	RNA methylation; RNA binding; RNA processing; methyltransferase activity; RNA methyltransferase activity; transferase activity; methylation	GO:0001510, GO:0003723, GO:0006396, GO:0008168, GO:0008173, GO:0016740, GO:0032259
A01p01080.1_BnaDAR	A01	449232	449960	1	***	Dof zinc finger protein-like	DNA binding; nucleus; regulation of transcription, DNA-templated	GO:0003677, GO:0005634, GO:0006355
A01p01090.1_BnaDAR	A01	453675	455160	4	***	Alcohol dehydrogenase, putative	zinc ion binding; lignin biosynthetic process; oxidoreductase activity; oxidoreductase activity, acting on the CH-OH group of donors, NAD or NADP as acceptor; cinnamyl-alcohol dehydrogenase activity; mannitol dehydrogenase activity; metal ion binding; oxidation-reduction process	GO:0008270, GO:0009809, GO:0016491, GO:0016616, GO:0045551, GO:0046029, GO:0046872, GO:0055114
A01p01100.1_BnaDAR	A01	456800	460078	6	***	Alcohol dehydrogenase, putative	zinc ion binding; lignin biosynthetic process; oxidoreductase activity; oxidoreductase activity, acting on the CH-OH group of donors, NAD or NADP as acceptor; cinnamyl-alcohol dehydrogenase activity; mannitol dehydrogenase activity; metal ion binding; oxidation-reduction process	GO:0008270, GO:0009809, GO:0016491, GO:0016616, GO:0045551, GO:0046029, GO:0046872, GO:0055114
A01p01110.1_BnaDAR	A01	466882	469651	6	***	MADS-box transcription factor	RNA polymerase II transcription regulatory region sequence-specific DNA binding; DNA binding; DNA-binding transcription factor activity; nucleus; regulation of transcription, DNA-templated; positive regulation of transcription by RNA polymerase II; protein dimerization activity	GO:0000977, GO:0003677, GO:0003700, GO:0005634, GO:0006355, GO:0045944, GO:0046983
A01p01120.1_BnaDAR	A01	469730	473329	23	***	Serine hydroxymethyltransferase	catalytic activity; glycine hydroxymethyltransferase activity; one-carbon metabolic process; transferase activity; glycine biosynthetic process from serine; pyridoxal phosphate binding; tetrahydrofolate interconversion	GO:0003824, GO:0004372, GO:0006730, GO:0016740, GO:0019264, GO:0030170, GO:0035999
A01p01130.1_BnaDAR	A01	473745	475567	6	***	Endoribonuclease E-like protein	chloroplast thylakoid membrane; chloroplast envelope	GO:0009535, GO:0009941
A01p01140.1_BnaDAR	A01	475662	478335	5	***	Chaperone DnaK	nucleotide binding; ATP binding; cell wall; mitochondrion; vacuolar membrane; protein folding; zinc ion binding; response to cadmium ion; unfolded protein binding	GO:0000166, GO:0005524, GO:0005618, GO:0005739, GO:0005774, GO:0006457, GO:0008270, GO:0046686, GO:0051082
A01p01150.1_BnaDAR	A01	478471	480088	2	***	Protein RMD5-like protein A	ubiquitin-protein transferase activity; protein ubiquitination; metal ion binding	GO:0004842, GO:0016567, GO:0046872
A01p01160.1_BnaDAR	A01	483571	487246	11	***	Phosphoenolpyruvate carboxykinase (ATP)	nucleotide binding; phosphoenolpyruvate carboxykinase activity; phosphoenolpyruvate carboxykinase (ATP) activity; ATP binding; nucleus; nucleolus; cytoplasm; cytosol; gluconeogenesis; defense response to fungus, incompatible interaction; cellular response to phosphate starvation; lyase activity; carboxy-lyase activity; purine nucleotide binding; response to cadmium ion; metal ion binding	GO:0000166, GO:0004611, GO:0004612, GO:0005524, GO:0005634, GO:0005730, GO:0005737, GO:0005829, GO:0006094, GO:0009817, GO:0016036, GO:0016829, GO:0016831, GO:0017076, GO:0046686, GO:0046872
A01p01170.1_BnaDAR	A01	487909	489293	5	***	SPT2 chromatin protein	DNA binding; nucleolus; nucleosome assembly; regulation of transcription, DNA-templated; regulation of chromatin assembly; histone binding; histone exchange	GO:0003677, GO:0005730, GO:0006334, GO:0006355, GO:0010847, GO:0042393, GO:0043486
A01p01180.1_BnaDAR	A01	489399	490195	2	--*	Transducin family protein / WD-40 repeat family protein	0
A01p01190.1_BnaDAR	A01	495556	496868	4	*-*	Basic helix-loop-helix transcription factor	nucleus; protein dimerization activity	GO:0005634, GO:0046983
A01p01200.1_BnaDAR	A01	501938	504088	8	***	Phosphotransferase	nucleotide binding; cellular glucose homeostasis; glucokinase activity; hexokinase activity; ATP binding; glucose binding; mitochondrion; cytosol; carbohydrate metabolic process; glycolytic process; fructokinase activity; kinase activity; phosphorylation; transferase activity; phosphotransferase activity, alcohol group as acceptor; mannokinase activity; hexose metabolic process; carbohydrate phos…	GO:0000166, GO:0001678, GO:0004340, GO:0004396, GO:0005524, GO:0005536, GO:0005739, GO:0005829, GO:0005975, GO:0006096, GO:0008865, GO:0016301, GO:0016310, GO:0016740, GO:0016773, GO:0019158, GO:0019318, GO:0046835, GO:0051156
A01p01210.1_BnaDAR	A01	505460	506209	3	***	Cytochrome c oxidase subunit 6a, mitochondrial	cytochrome-c oxidase activity; mitochondrion; mitochondrial inner membrane; mitochondrial respiratory chain complex IV; mitochondrial electron transport, cytochrome c to oxygen; aerobic respiration; membrane; enzyme regulator activity; regulation of catalytic activity; proton transmembrane transport	GO:0004129, GO:0005739, GO:0005743, GO:0005751, GO:0006123, GO:0009060, GO:0016020, GO:0030234, GO:0050790, GO:1902600
A01p01220.1_BnaDAR	A01	510451	510978	3	***	EPIDERMAL PATTERNING FACTOR-like protein 2	extracellular region; multicellular organism development; guard cell differentiation; stomatal complex development	GO:0005576, GO:0007275, GO:0010052, GO:0010374
A01p01230.1_BnaDAR	A01	515945	516695	1	*-*	Calcium-dependent protein kinase 28	nucleotide binding; protein kinase activity; calcium ion binding; ATP binding; protein phosphorylation; kinase activity; phosphorylation; transferase activity; metal ion binding	GO:0000166, GO:0004672, GO:0005509, GO:0005524, GO:0006468, GO:0016301, GO:0016310, GO:0016740, GO:0046872
A01p01240.1_BnaDAR	A01	524891	525546	1	***	BnaC02g42400D protein	membrane; integral component of membrane	GO:0016020, GO:0016021
A01p01250.1_BnaDAR	A01	526933	527966	3	***	Homeobox-leucine zipper protein	DNA-binding transcription factor activity, RNA polymerase II-specific; DNA binding; nucleus; regulation of transcription, DNA-templated; regulation of transcription by RNA polymerase II; sequence-specific DNA binding	GO:0000981, GO:0003677, GO:0005634, GO:0006355, GO:0006357, GO:0043565
A01p01260.1_BnaDAR	A01	538878	540943	5	*-*	Transmembrane protein	membrane; integral component of membrane	GO:0016020, GO:0016021
A01p01270.1_BnaDAR	A01	543611	545034	3	*-*	Myb transcription factor	nucleus	GO:0005634
A01p01280.1_BnaDAR	A01	550655	552536	4	***	1-aminocyclopropane-1-carboxylate synthase-like protein	catalytic activity; biosynthetic process; pyridoxal phosphate binding	GO:0003824, GO:0009058, GO:0030170
A01p01290.1_BnaDAR	A01	560968	563453	5	***	Squalene monooxygenase, putative	monooxygenase activity; squalene monooxygenase activity; endoplasmic reticulum; membrane; integral component of membrane; sterol biosynthetic process; oxidoreductase activity; flavin adenine dinucleotide binding; oxidation-reduction process	GO:0004497, GO:0004506, GO:0005783, GO:0016020, GO:0016021, GO:0016126, GO:0016491, GO:0050660, GO:0055114
A01p01300.1_BnaDAR	A01	566209	569083	7	***	AP2-like ethylene-responsive transcription factor ANT	DNA binding; DNA-binding transcription factor activity; nucleus; regulation of transcription, DNA-templated	GO:0003677, GO:0003700, GO:0005634, GO:0006355
A01p01310.1_BnaDAR	A01	584540	586274	4	***	Growth-regulating factor 2	ATP binding; nucleus; transcription, DNA-templated; regulation of transcription, DNA-templated; developmental process	GO:0005524, GO:0005634, GO:0006351, GO:0006355, GO:0032502
A01p01320.1_BnaDAR	A01	587148	587979	1	*-*	Basic-leucine zipper (BZIP) transcription factor family	transcription regulatory region sequence-specific DNA binding; DNA-binding transcription factor activity; nucleus; regulation of transcription, DNA-templated; sequence-specific DNA binding; positive regulation of transcription, DNA-templated	GO:0000976, GO:0003700, GO:0005634, GO:0006355, GO:0043565, GO:0045893
A01p01330.1_BnaDAR	A01	591714	593835	4	***	Heptahelical transmembrane protein	membrane; integral component of membrane	GO:0016020, GO:0016021
A01p01340.1_BnaDAR	A01	598783	598994	1	*-*	SOUL heme-binding family protein	vacuole; endoplasmic reticulum; Golgi apparatus; plasma membrane; red or far-red light signaling pathway; heme binding	GO:0005773, GO:0005783, GO:0005794, GO:0005886, GO:0010017, GO:0020037
A01p01350.1_BnaDAR	A01	599562	602017	9	***	Amino-acid acetyltransferase	acetyl-CoA:L-glutamate N-acetyltransferase activity; cytoplasm; arginine biosynthetic process; N-acetyltransferase activity; cellular amino acid biosynthetic process; transferase activity; transferase activity, transferring acyl groups; methione N-acyltransferase activity	GO:0004042, GO:0005737, GO:0006526, GO:0008080, GO:0008652, GO:0016740, GO:0016746, GO:0103045
A01p01360.1_BnaDAR	A01	604045	605646	1	***	Protein SHORT-ROOT	DNA-binding transcription factor activity; protein binding; nucleus; cytoplasm; endosome; early endosome; late endosome; regulation of transcription, DNA-templated; multicellular organism development; asymmetric cell division; radial pattern formation; regulation of hormone metabolic process; sequence-specific DNA binding; negative regulation of mitotic cell cycle; leaf development; recycling end…	GO:0003700, GO:0005515, GO:0005634, GO:0005737, GO:0005768, GO:0005769, GO:0005770, GO:0006355, GO:0007275, GO:0008356, GO:0009956, GO:0032350, GO:0043565, GO:0045930, GO:0048366, GO:0055037, GO:0055072
A01p01370.1_BnaDAR	A01	611724	613291	4	***	BTB/POZ and TAZ domain protein	metal ion binding	GO:0046872
A01p01380.1_BnaDAR	A01	616549	618461	3	***	Acyl-CoA N-acyltransferases (NAT) superfamily protein	N-acetyltransferase activity; transferase activity; transferase activity, transferring acyl groups; transferase activity, transferring acyl groups other than amino-acyl groups	GO:0008080, GO:0016740, GO:0016746, GO:0016747
A01p01390.1_BnaDAR	A01	626671	629045	7	***	Formamidase-like protein	hydrolase activity, acting on carbon-nitrogen (but not peptide) bonds, in linear amides	GO:0016811
A01p01400.1_BnaDAR	A01	629405	631751	7	***	Formamidase-like protein	hydrolase activity, acting on carbon-nitrogen (but not peptide) bonds, in linear amides	GO:0016811
A01p01410.1_BnaDAR	A01	635130	636304	2	***	LOB domain-containing protein	regulation of gene expression	GO:0010468
A01p01420.1_BnaDAR	A01	639986	640709	4	--*	3-phytase A	extracellular region; 3-phytase activity; dephosphorylation; hydrolase activity; phosphatase activity	GO:0005576, GO:0016158, GO:0016311, GO:0016787, GO:0016791
A01p01430.1_BnaDAR	A01	640632	641013	2	*-*	Peroxidase	peroxidase activity; extracellular region; response to oxidative stress; oxidoreductase activity; heme binding; hydrogen peroxide catabolic process; metal ion binding; oxidation-reduction process; cellular oxidant detoxification	GO:0004601, GO:0005576, GO:0006979, GO:0016491, GO:0020037, GO:0042744, GO:0046872, GO:0055114, GO:0098869
A01p01440.1_BnaDAR	A01	642620	644336	4	***	Peroxidase	peroxidase activity; extracellular region; response to oxidative stress; oxidoreductase activity; heme binding; hydrogen peroxide catabolic process; metal ion binding; oxidation-reduction process; cellular oxidant detoxification	GO:0004601, GO:0005576, GO:0006979, GO:0016491, GO:0020037, GO:0042744, GO:0046872, GO:0055114, GO:0098869
A01p01450.1_BnaDAR	A01	647992	650468	4	***	Ribonuclease 3	ribonuclease III activity; RNA processing; RNA phosphodiester bond hydrolysis; RNA phosphodiester bond hydrolysis, endonucleolytic	GO:0004525, GO:0006396, GO:0090501, GO:0090502
A01p01460.1_BnaDAR	A01	651223	653145	7	***	Cyclin	regulation of cell growth; cell cycle; response to gamma radiation; cell division	GO:0001558, GO:0007049, GO:0010332, GO:0051301
A01p01470.1_BnaDAR	A01	653628	653858	1	*-*	Myb transcription factor	nucleus	GO:0005634
A01p01480.1_BnaDAR	A01	657497	664647	24	***	tetratricopeptide repeat protein 13	membrane; integral component of membrane	GO:0016020, GO:0016021
A01p01490.1_BnaDAR	A01	660319	660931	2	--*	Diacylglycerol kinase eta	nucleotide binding; NAD+ kinase activity; diacylglycerol kinase activity; ATP binding; cytoplasm; signal transduction; protein kinase C-activating G protein-coupled receptor signaling pathway; kinase activity; phosphorylation; transferase activity; intracellular signal transduction; diacylglycerol metabolic process; glycerolipid metabolic process; lipid phosphorylation; metal ion binding	GO:0000166, GO:0003951, GO:0004143, GO:0005524, GO:0005737, GO:0007165, GO:0007205, GO:0016301, GO:0016310, GO:0016740, GO:0035556, GO:0046339, GO:0046486, GO:0046834, GO:0046872
A01p01500.1_BnaDAR	A01	666085	667040	2	*-*	Lysine-rich arabinogalactan protein 18	plasma membrane; megasporogenesis; membrane; anchored component of membrane	GO:0005886, GO:0009554, GO:0016020, GO:0031225
A01p01510.1_BnaDAR	A01	669061	672484	8	*-*	Calcium ion-binding protein	cellular_component; biological_process	GO:0005575, GO:0008150
A01p01520.1_BnaDAR	A01	673074	673970	4	***	Calcium ion-binding protein	0
A01p01530.1_BnaDAR	A01	675214	676603	5	*-*	meiosis arrest female protein 1	peroxisome; regulation of gene expression	GO:0005777, GO:0010468
A01p01540.1_BnaDAR	A01	678247	679081	3	***	Calcium ion-binding protein	cellular_component; biological_process	GO:0005575, GO:0008150
A01p01550.1_BnaDAR	A01	679585	681040	4	--*	Ribosomal RNA small subunit methyltransferase A	rRNA modification; rRNA (adenine-N6,N6-)-dimethyltransferase activity; RNA binding; cytoplasm; rRNA processing; methyltransferase activity; rRNA methyltransferase activity; rRNA (adenine) methyltransferase activity; transferase activity; rRNA methylation; methylation; 16S rRNA (adenine(1518)-N(6)/adenine(1519)-N(6))-dimethyltransferase activity	GO:0000154, GO:0000179, GO:0003723, GO:0005737, GO:0006364, GO:0008168, GO:0008649, GO:0016433, GO:0016740, GO:0031167, GO:0032259, GO:0052908
A01p01560.1_BnaDAR	A01	684175	691936	8	***	MADS-box transcription factor-like protein	transcription regulatory region sequence-specific DNA binding; RNA polymerase II transcription regulatory region sequence-specific DNA binding; DNA-binding transcription factor activity, RNA polymerase II-specific; DNA binding; nucleus; regulation of transcription by RNA polymerase II; transcription factor binding; membrane; integral component of membrane; sequence-specific DNA binding; protein d…	GO:0000976, GO:0000977, GO:0000981, GO:0003677, GO:0005634, GO:0006357, GO:0008134, GO:0016020, GO:0016021, GO:0043565, GO:0046983
A01p01570.1_BnaDAR	A01	688687	690512	5	***	BnaAnng14700D protein	RNA polymerase II cis-regulatory region sequence-specific DNA binding; DNA-binding transcription factor activity, RNA polymerase II-specific; nucleus; regulation of transcription, DNA-templated; regulation of transcription by RNA polymerase II	GO:0000978, GO:0000981, GO:0005634, GO:0006355, GO:0006357
A01p01580.1_BnaDAR	A01	692224	694240	2	***	Cytochrome P450 81F1	monooxygenase activity; iron ion binding; endoplasmic reticulum; membrane; integral component of membrane; oxidoreductase activity; oxidoreductase activity, acting on paired donors, with incorporation or reduction of molecular oxygen; oxidoreductase activity, acting on paired donors, with incorporation or reduction of molecular oxygen, NAD(P)H as one donor, and incorporation of one atom of oxygen…	GO:0004497, GO:0005506, GO:0005783, GO:0016020, GO:0016021, GO:0016491, GO:0016705, GO:0016709, GO:0020037, GO:0042343, GO:0046872, GO:0055114
A01p01590.1_BnaDAR	A01	696368	698042	2	***	Cytochrome P450 81F1	monooxygenase activity; iron ion binding; endoplasmic reticulum; membrane; integral component of membrane; oxidoreductase activity; oxidoreductase activity, acting on paired donors, with incorporation or reduction of molecular oxygen; oxidoreductase activity, acting on paired donors, with incorporation or reduction of molecular oxygen, NAD(P)H as one donor, and incorporation of one atom of oxygen…	GO:0004497, GO:0005506, GO:0005783, GO:0016020, GO:0016021, GO:0016491, GO:0016705, GO:0016709, GO:0020037, GO:0042343, GO:0046872, GO:0055114
A01p01600.1_BnaDAR	A01	700828	702555	1	***	Glycosyltransferase family 92 protein	membrane; integral component of membrane; transferase activity; transferase activity, transferring glycosyl groups	GO:0016020, GO:0016021, GO:0016740, GO:0016757
A01p01610.1_BnaDAR	A01	705344	707224	2	***	Cytochrome P450, putative	monooxygenase activity; iron ion binding; membrane; integral component of membrane; oxidoreductase activity; oxidoreductase activity, acting on paired donors, with incorporation or reduction of molecular oxygen; heme binding; metal ion binding; oxidation-reduction process	GO:0004497, GO:0005506, GO:0016020, GO:0016021, GO:0016491, GO:0016705, GO:0020037, GO:0046872, GO:0055114
A01p01620.1_BnaDAR	A01	719056	721398	2	***	Cytochrome P450 81F3	monooxygenase activity; iron ion binding; membrane; integral component of membrane; oxidoreductase activity; oxidoreductase activity, acting on paired donors, with incorporation or reduction of molecular oxygen; oxidoreductase activity, acting on paired donors, with incorporation or reduction of molecular oxygen, NAD(P)H as one donor, and incorporation of one atom of oxygen; heme binding; indole …	GO:0004497, GO:0005506, GO:0016020, GO:0016021, GO:0016491, GO:0016705, GO:0016709, GO:0020037, GO:0042343, GO:0046872, GO:0055114
A01p01630.1_BnaDAR	A01	728879	731122	3	***	Indole-3-acetic acid-amido synthetase GH3.3	cytoplasm; auxin homeostasis; indole-3-acetic acid amido synthetase activity; ligase activity; acid-amino acid ligase activity	GO:0005737, GO:0010252, GO:0010279, GO:0016874, GO:0016881
A01p01640.1_BnaDAR	A01	740549	742550	3	***	Cytochrome P450-like protein	monooxygenase activity; iron ion binding; membrane; integral component of membrane; oxidoreductase activity; oxidoreductase activity, acting on paired donors, with incorporation or reduction of molecular oxygen; heme binding; metal ion binding; oxidation-reduction process	GO:0004497, GO:0005506, GO:0016020, GO:0016021, GO:0016491, GO:0016705, GO:0020037, GO:0046872, GO:0055114
A01p01650.1_BnaDAR	A01	744094	747166	3	***	Cytochrome P450 like protein	monooxygenase activity; iron ion binding; oxidoreductase activity; oxidoreductase activity, acting on paired donors, with incorporation or reduction of molecular oxygen; heme binding; metal ion binding; oxidation-reduction process	GO:0004497, GO:0005506, GO:0016491, GO:0016705, GO:0020037, GO:0046872, GO:0055114
A01p01660.1_BnaDAR	A01	750720	753390	3	***	Cytochrome P450 like protein	monooxygenase activity; iron ion binding; oxidoreductase activity; oxidoreductase activity, acting on paired donors, with incorporation or reduction of molecular oxygen; heme binding; metal ion binding; oxidation-reduction process	GO:0004497, GO:0005506, GO:0016491, GO:0016705, GO:0020037, GO:0046872, GO:0055114
A01p01670.1_BnaDAR	A01	753689	755665	4	***	Maternal effect embryo arrest protein	embryo development ending in seed dormancy	GO:0009793
A01p01680.1_BnaDAR	A01	764304	764829	1	--*	Ion-translocating oxidoreductase complex subunit D	plasma membrane; membrane; integral component of membrane; electron transport chain; transmembrane transport; oxidation-reduction process	GO:0005886, GO:0016020, GO:0016021, GO:0022900, GO:0055085, GO:0055114
A01p01690.1_BnaDAR	A01	765161	767741	11	***	Mortality factor 4-like protein 1	nucleus; chromatin organization; regulation of transcription, DNA-templated	GO:0005634, GO:0006325, GO:0006355
A01p01700.1_BnaDAR	A01	767848	772144	13	***	HMA1	nucleotide binding; ATP binding; cation transport; membrane; integral component of membrane; ATPase-coupled cation transmembrane transporter activity; metal ion binding; cation transmembrane transport	GO:0000166, GO:0005524, GO:0006812, GO:0016020, GO:0016021, GO:0019829, GO:0046872, GO:0098655
A01p01710.1_BnaDAR	A01	772153	773401	1	***	MYB transcription factor 73	nucleus	GO:0005634
A01p01720.1_BnaDAR	A01	788966	791459	2	***	Receptor protein kinase-like protein	protein kinase activity; ATP binding; protein phosphorylation; membrane; integral component of membrane; kinase activity; phosphorylation	GO:0004672, GO:0005524, GO:0006468, GO:0016020, GO:0016021, GO:0016301, GO:0016310
A01p01730.1_BnaDAR	A01	791777	793841	4	***	Cysteine proteinase	proteolysis; peptidase activity; cysteine-type peptidase activity; hydrolase activity	GO:0006508, GO:0008233, GO:0008234, GO:0016787
A01p01740.1_BnaDAR	A01	796887	802808	4	***	Glycosyltransferases	Golgi membrane; Golgi apparatus; carbohydrate metabolic process; plant-type secondary cell wall biogenesis; glucuronoxylan biosynthetic process; galactosylgalactosylxylosylprotein 3-beta-glucuronosyltransferase activity; membrane; integral component of membrane; transferase activity; transferase activity, transferring glycosyl groups; xylosyltransferase activity; cell wall organization	GO:0000139, GO:0005794, GO:0005975, GO:0009834, GO:0010417, GO:0015018, GO:0016020, GO:0016021, GO:0016740, GO:0016757, GO:0042285, GO:0071555
A01p01750.1_BnaDAR	A01	809785	810894	1	***	Ethylene-responsive transcription factor	DNA binding; DNA-binding transcription factor activity; nucleus; regulation of transcription, DNA-templated; defense response	GO:0003677, GO:0003700, GO:0005634, GO:0006355, GO:0006952
A01p01760.1_BnaDAR	A01	813957	814308	3	*-*	CBS domain-containing protein CBSX1, chloroplastic	chloroplast; plastid; cell redox homeostasis	GO:0009507, GO:0009536, GO:0045454
A01p01770.1_BnaDAR	A01	821240	824364	6	--*	Ulp1 protease family, C-terminal catalytic domain containing protein	proteolysis; peptidase activity; cysteine-type peptidase activity	GO:0006508, GO:0008233, GO:0008234
A01p01780.1_BnaDAR	A01	828715	831192	10	***	Floral homeotic protein APETALA 2	DNA binding; DNA-binding transcription factor activity; nucleus; regulation of transcription, DNA-templated; multicellular organism development; flower development; meristem maintenance; specification of floral organ identity; cell differentiation; seed development; plant ovule development	GO:0003677, GO:0003700, GO:0005634, GO:0006355, GO:0007275, GO:0009908, GO:0010073, GO:0010093, GO:0030154, GO:0048316, GO:0048481
A01p01790.1_BnaDAR	A01	837303	839758	4	*-*	Cell division protein	RNA methylation; tRNA processing; methyltransferase activity; tRNA methyltransferase activity; transferase activity; tRNA methylation; methylation; cell division	GO:0001510, GO:0008033, GO:0008168, GO:0008175, GO:0016740, GO:0030488, GO:0032259, GO:0051301
A01p01800.1_BnaDAR	A01	845075	846947	7	***	Transcription factor SPATULA	transcription regulatory region sequence-specific DNA binding; DNA binding; DNA-binding transcription factor activity; protein binding; nucleus; regulation of transcription, DNA-templated; multicellular organism development; circadian rhythm; response to cold; response to red light; fruit development; negative regulation of seed germination; identical protein binding; protein dimerization activit…	GO:0000976, GO:0003677, GO:0003700, GO:0005515, GO:0005634, GO:0006355, GO:0007275, GO:0007623, GO:0009409, GO:0010114, GO:0010154, GO:0010187, GO:0042802, GO:0046983, GO:0048440
A01p01810.1_BnaDAR	A01	848697	849989	1	***	Mitogen-activated protein kinase kinase kinase 21.1	nucleotide binding; protein kinase activity; protein serine/threonine kinase activity; ATP binding; protein phosphorylation; kinase activity; phosphorylation; transferase activity	GO:0000166, GO:0004672, GO:0004674, GO:0005524, GO:0006468, GO:0016301, GO:0016310, GO:0016740
A01p01820.1_BnaDAR	A01	855372	857024	3	*-*	BnaC09g26050D protein	proteolysis; cysteine-type peptidase activity	GO:0006508, GO:0008234
A01p01830.1_BnaDAR	A01	857548	858370	5	***	RNA-binding protein	nucleic acid binding; RNA binding	GO:0003676, GO:0003723
A01p01840.1_BnaDAR	A01	858864	860536	4	***	Remorin family protein	plasma membrane	GO:0005886
A01p01850.1_BnaDAR	A01	863031	865886	12	***	CLK4-associating serine/arginine-rich protein	biological_process	GO:0008150
A01p01860.1_BnaDAR	A01	870155	871683	2	***	Heat shock transcription factor	RNA polymerase II cis-regulatory region sequence-specific DNA binding; DNA binding; DNA-binding transcription factor activity; nucleus; regulation of transcription, DNA-templated; regulation of transcription by RNA polymerase II; sequence-specific DNA binding	GO:0000978, GO:0003677, GO:0003700, GO:0005634, GO:0006355, GO:0006357, GO:0043565
A01p01870.1_BnaDAR	A01	872669	875655	7	***	Red chlorophyll catabolite reductase	chloroplast; plastid; red chlorophyll catabolite reductase activity; oxidation-reduction process	GO:0009507, GO:0009536, GO:0051743, GO:0055114
A01p01880.1_BnaDAR	A01	878264	880099	8	***	Methionine aminopeptidase	aminopeptidase activity; proteolysis; peptidase activity; hydrolase activity; metal ion binding; metalloaminopeptidase activity; protein initiator methionine removal	GO:0004177, GO:0006508, GO:0008233, GO:0016787, GO:0046872, GO:0070006, GO:0070084
A01p01890.1_BnaDAR	A01	880080	882556	7	***	Patatin	lipid metabolic process; lipid catabolic process; hydrolase activity	GO:0006629, GO:0016042, GO:0016787
A01p01900.1_BnaDAR	A01	884489	891542	12	***	Patatin	phospholipase activity; lipid metabolic process; membrane; integral component of membrane; lipid catabolic process; hydrolase activity; acylglycerol lipase activity	GO:0004620, GO:0006629, GO:0016020, GO:0016021, GO:0016042, GO:0016787, GO:0047372
A01p01910.1_BnaDAR	A01	899177	901782	8	***	Threonine--tRNA ligase	ligase activity	GO:0016874
A01p01920.1_BnaDAR	A01	902515	903762	5	***	UDP-N-acetylmuramoyl-L-alanyl-D-glutamate-2, 6-diaminopimelate ligase	biological_process; ligase activity	GO:0008150, GO:0016874
A01p01930.1_BnaDAR	A01	905677	907995	1	***	Molybdenum cofactor sulfurase	catalytic activity	GO:0003824
A01p01940.1_BnaDAR	A01	909930	911742	5	***	Cell division cycle-associated 7-like protein	nucleus; cytoplasm; regulation of transcription, DNA-templated; cell division	GO:0005634, GO:0005737, GO:0006355, GO:0051301
A01p01950.1_BnaDAR	A01	912954	915066	5	***	Nuclear pore complex protein NUP58	protein binding; nucleus; nuclear envelope; nuclear pore; nucleocytoplasmic transport; nuclear localization sequence binding; protein transport; structural constituent of nuclear pore; mRNA transport	GO:0005515, GO:0005634, GO:0005635, GO:0005643, GO:0006913, GO:0008139, GO:0015031, GO:0017056, GO:0051028
A01p01960.1_BnaDAR	A01	915255	916375	3	***	Salicylic acid-binding protein 2	jasmonic acid metabolic process; salicylic acid metabolic process; hydrolase activity; methyl indole-3-acetate esterase activity; methyl salicylate esterase activity; methyl jasmonate esterase activity	GO:0009694, GO:0009696, GO:0016787, GO:0080030, GO:0080031, GO:0080032
A01p01970.1_BnaDAR	A01	917381	919619	8	***	L-ascorbate oxidase-like protein	copper ion binding; oxidoreductase activity; oxidation-reduction process	GO:0005507, GO:0016491, GO:0055114
A01p01980.1_BnaDAR	A01	922009	924066	1	***	Pentatricopeptide repeat-containing protein	zinc ion binding	GO:0008270
A01p01990.1_BnaDAR	A01	928061	929365	5	***	Myb family transcription factor APL	nucleus	GO:0005634
A01p02000.1_BnaDAR	A01	930665	932196	4	***	Thiol:disulfide interchange protein txlA, putative	chloroplast; chloroplast thylakoid membrane; cytochrome b6f complex assembly; oxidoreductase activity, acting on a sulfur group of donors, disulfide as acceptor; oxidation-reduction process	GO:0009507, GO:0009535, GO:0010190, GO:0016671, GO:0055114
A01p02010.1_BnaDAR	A01	932477	934323	6	***	nuclear autoantigenic sperm protein-like	nucleus; nucleoplasm; DNA replication-dependent nucleosome assembly; CENP-A containing nucleosome assembly; histone binding	GO:0005634, GO:0005654, GO:0006335, GO:0034080, GO:0042393
A01p02020.1_BnaDAR	A01	935714	937478	3	***	CASP-like protein	plasma membrane; membrane; integral component of membrane	GO:0005886, GO:0016020, GO:0016021
A01p02030.1_BnaDAR	A01	946457	947264	1	***	HTH-type transcriptional regulator	cellular_component; response to fungus	GO:0005575, GO:0009620
A01p02040.1_BnaDAR	A01	949456	952001	7	***	Cytoplasmic tRNA 2-thiolation protein 2	tRNA binding; tRNA wobble uridine modification; tRNA wobble position uridine thiolation; cytoplasm; cytosol; tRNA processing; nucleotidyltransferase activity; sulfurtransferase activity; protein urmylation; tRNA thio-modification	GO:0000049, GO:0002098, GO:0002143, GO:0005737, GO:0005829, GO:0008033, GO:0016779, GO:0016783, GO:0032447, GO:0034227
A01p02050.1_BnaDAR	A01	952030	956834	4	***	BEL1-like homeodomain protein 2	nuclear chromatin; RNA polymerase II cis-regulatory region sequence-specific DNA binding; DNA-binding transcription factor activity, RNA polymerase II-specific; DNA binding; DNA-binding transcription factor activity; nucleus; regulation of transcription, DNA-templated; regulation of transcription by RNA polymerase II; leaf morphogenesis; mucilage pectin metabolic process	GO:0000790, GO:0000978, GO:0000981, GO:0003677, GO:0003700, GO:0005634, GO:0006355, GO:0006357, GO:0009965, GO:0048363
A01p02060.1_BnaDAR	A01	962993	968120	12	***	Protein DA1-related 1	protein binding; plasma membrane; proteolysis; peptidase activity; regulation of DNA endoreduplication; ubiquitin binding; metal ion binding	GO:0005515, GO:0005886, GO:0006508, GO:0008233, GO:0032875, GO:0043130, GO:0046872
A01p02070.1_BnaDAR	A01	970791	973091	10	***	PQ-loop repeat family protein / transmembrane family protein	membrane; integral component of membrane	GO:0016020, GO:0016021
A01p02080.1_BnaDAR	A01	973802	975008	2	***	Calcium uniporter, mitochondrial	calcium channel activity; mitochondrion; mitochondrial inner membrane; ion transport; calcium ion transport; uniporter activity; membrane; integral component of membrane; mitochondrial calcium ion homeostasis; calcium ion transmembrane transport	GO:0005262, GO:0005739, GO:0005743, GO:0006811, GO:0006816, GO:0015292, GO:0016020, GO:0016021, GO:0051560, GO:0070588
A01p02090.1_BnaDAR	A01	976849	978240	1	***	Geranylgeranyl pyrophosphate synthase	isoprenoid biosynthetic process; transferase activity	GO:0008299, GO:0016740
A01p02100.1_BnaDAR	A01	980551	982119	5	***	Ubiquitin-conjugating enzyme	nucleotide binding; ubiquitin activating enzyme activity; ATP binding; protein ubiquitination; transferase activity; transferase activity, transferring acyl groups; ligase activity	GO:0000166, GO:0004839, GO:0005524, GO:0016567, GO:0016740, GO:0016746, GO:0016874
A01p02110.1_BnaDAR	A01	982110	984120	5	***	Major facilitator superfamily protein	Golgi medial cisterna; membrane; integral component of membrane; transmembrane transporter activity; transmembrane transport	GO:0005797, GO:0016020, GO:0016021, GO:0022857, GO:0055085
A01p02120.1_BnaDAR	A01	986617	988365	2	***	BES1/BZR1 homolog protein 2	DNA binding; DNA-binding transcription factor activity; transcription, DNA-templated; regulation of transcription, DNA-templated; brassinosteroid mediated signaling pathway	GO:0003677, GO:0003700, GO:0006351, GO:0006355, GO:0009742
A01p02130.1_BnaDAR	A01	989317	990702	1	***	Glycosyltransferase	UDP-glycosyltransferase activity; transferase activity; transferase activity, transferring glycosyl groups	GO:0008194, GO:0016740, GO:0016757
A01p02140.1_BnaDAR	A01	992024	992739	2	*-*	Protein-S-isoprenylcysteine O-methyltransferase	protein C-terminal S-isoprenylcysteine carboxyl O-methyltransferase activity; endoplasmic reticulum; endoplasmic reticulum membrane; C-terminal protein methylation; methyltransferase activity; flower development; membrane; integral component of membrane; transferase activity; methylation; shoot system development	GO:0004671, GO:0005783, GO:0005789, GO:0006481, GO:0008168, GO:0009908, GO:0016020, GO:0016021, GO:0016740, GO:0032259, GO:0048367
A01p02150.1_BnaDAR	A01	993352	996391	12	***	Xaa-pro aminopeptidase, putative	aminopeptidase activity; proteolysis; hydrolase activity; metal ion binding; metalloaminopeptidase activity	GO:0004177, GO:0006508, GO:0016787, GO:0046872, GO:0070006
A01p02160.1_BnaDAR	A01	996752	998192	2	***	NAD(P)H dehydrogenase (Quinone)	NAD(P)H dehydrogenase (quinone) activity; FMN binding; oxidoreductase activity; oxidation-reduction process	GO:0003955, GO:0010181, GO:0016491, GO:0055114
A01p02170.1_BnaDAR	A01	1007727	1009774	3	***	Homeobox-leucine zipper protein like	DNA-binding transcription factor activity, RNA polymerase II-specific; DNA binding; nucleus; regulation of transcription, DNA-templated; regulation of transcription by RNA polymerase II	GO:0000981, GO:0003677, GO:0005634, GO:0006355, GO:0006357
A01p02180.1_BnaDAR	A01	1012594	1014729	11	***	G-box-binding factor 1	DNA-binding transcription factor activity; nucleus; regulation of transcription, DNA-templated	GO:0003700, GO:0005634, GO:0006355
A01p02190.1_BnaDAR	A01	1014730	1016186	8	***	HVA22-like protein	membrane	GO:0016020
A01p02200.1_BnaDAR	A01	1016335	1017988	1	***	SCARECROW-like protein	protein binding	GO:0005515
A01p02210.1_BnaDAR	A01	1024346	1026302	5	***	U2 snRNP auxiliary factor large subunit	commitment complex; nucleic acid binding; RNA binding; nucleus; mRNA processing; poly-pyrimidine tract binding; RNA splicing; nuclear speck; pre-mRNA 3'-splice site binding; U2-type prespliceosome; U2AF complex	GO:0000243, GO:0003676, GO:0003723, GO:0005634, GO:0006397, GO:0008187, GO:0008380, GO:0016607, GO:0030628, GO:0071004, GO:0089701
A01p02220.1_BnaDAR	A01	1028530	1032049	5	***	BnaA03g53530D protein	membrane; integral component of membrane; transmembrane transporter activity; transmembrane transport	GO:0016020, GO:0016021, GO:0022857, GO:0055085
A01p02230.1_BnaDAR	A01	1032616	1033061	2	*-*	Transcription initiation factor IIB	translation initiation factor activity; DNA-templated transcription, initiation; translational initiation; TBP-class protein binding; transcription preinitiation complex assembly	GO:0003743, GO:0006352, GO:0006413, GO:0017025, GO:0070897
A01p02240.1_BnaDAR	A01	1033740	1036069	2	*-*	Acidic leucine-rich nuclear phosphoprotein 32-related protein	histone binding	GO:0042393
A01p02250.1_BnaDAR	A01	1038188	1038696	1	--*	Glyceraldehyde-3-phosphate dehydrogenase	nucleotide binding; glucose metabolic process; oxidoreductase activity; oxidoreductase activity, acting on the aldehyde or oxo group of donors, NAD or NADP as acceptor; NADP binding; NAD binding; oxidation-reduction process	GO:0000166, GO:0006006, GO:0016491, GO:0016620, GO:0050661, GO:0051287, GO:0055114
A01p02260.1_BnaDAR	A01	1044749	1046479	2	*-*	Reverse transcriptase	RNA-directed DNA polymerase activity; RNA-dependent DNA biosynthetic process	GO:0003964, GO:0006278
A01p02270.1_BnaDAR	A01	1048041	1049315	5	***	random slug protein 5-like	phosphatidylinositol transfer activity; phospholipid transport; intermembrane lipid transfer	GO:0008526, GO:0015914, GO:0120009
A01p02280.1_BnaDAR	A01	1054409	1055748	3	***	GATA transcription factor, putative	regulation of transcription, DNA-templated; zinc ion binding; sequence-specific DNA binding; metal ion binding	GO:0006355, GO:0008270, GO:0043565, GO:0046872
A01p02290.1_BnaDAR	A01	1057578	1059851	4	***	Hydrolase, alpha/beta fold family protein	hydrolase activity	GO:0016787
A01p02300.1_BnaDAR	A01	1060746	1062124	4	***	Hydrolase, alpha/beta fold family protein	hydrolase activity	GO:0016787
A01p02310.1_BnaDAR	A01	1062125	1064810	6	***	ATPase family AAA domain-containing protein 3	nucleotide binding; ATP binding; mitochondrion; mitochondrion organization; ATPase activity	GO:0000166, GO:0005524, GO:0005739, GO:0007005, GO:0016887
A01p02320.1_BnaDAR	A01	1067512	1068615	2	***	Protein RADIALIS-like	nucleus	GO:0005634
A01p02330.1_BnaDAR	A01	1075949	1078834	4	***	RING-type E3 ubiquitin transferase	ubiquitin-protein transferase activity; nucleus; cytoplasm; protein ubiquitination	GO:0004842, GO:0005634, GO:0005737, GO:0016567
A01p02340.1_BnaDAR	A01	1079566	1082601	6	***	Alpha/beta hydrolase, putative	chloroplast; hydrolase activity; carboxylic ester hydrolase activity; methyl indole-3-acetate esterase activity	GO:0009507, GO:0016787, GO:0052689, GO:0080030
A01p02350.1_BnaDAR	A01	1091479	1095886	6	***	Chaperone DnaJ-domain superfamily protein	cytoplasm; receptor-mediated endocytosis; clathrin binding; vesicle; intracellular membrane-bounded organelle; clathrin coat disassembly; clathrin-dependent endocytosis	GO:0005737, GO:0006898, GO:0030276, GO:0031982, GO:0043231, GO:0072318, GO:0072583
A01p02360.1_BnaDAR	A01	1096112	1096483	1	***	At2g18210	biological_process	GO:0008150
A01p02370.1_BnaDAR	A01	1097657	1098384	1	***	At2g18210	biological_process	GO:0008150
A01p02380.1_BnaDAR	A01	1098597	1100138	4	***	Salicylate O-methyltransferase	methyltransferase activity; transferase activity; methylation	GO:0008168, GO:0016740, GO:0032259
A01p02390.1_BnaDAR	A01	1104234	1107186	10	***	Serine palmitoyltransferase long chain base subunit	catalytic activity; biosynthetic process; transferase activity; pyridoxal phosphate binding	GO:0003824, GO:0009058, GO:0016740, GO:0030170
A01p02400.1_BnaDAR	A01	1107697	1116186	26	***	Phosphatidylinositol/phosphatidylcholine transfer protein SFH12	Golgi membrane; Golgi apparatus; plasma membrane; protein transport; membrane	GO:0000139, GO:0005794, GO:0005886, GO:0015031, GO:0016020
A01p02410.1_BnaDAR	A01	1117579	1119087	4	***	Peroxidase	peroxidase activity; extracellular region; response to oxidative stress; oxidoreductase activity; heme binding; hydrogen peroxide catabolic process; metal ion binding; oxidation-reduction process; cellular oxidant detoxification	GO:0004601, GO:0005576, GO:0006979, GO:0016491, GO:0020037, GO:0042744, GO:0046872, GO:0055114, GO:0098869
A01p02420.1_BnaDAR	A01	1122100	1123633	5	--*	Replication factor A protein 1	telomere maintenance via recombination; telomere maintenance; double-strand break repair via homologous recombination; chromosome, telomeric region; condensed nuclear chromosome; nucleic acid binding; DNA binding; damaged DNA binding; double-stranded DNA binding; single-stranded DNA binding; mRNA binding; protein binding; nucleus; DNA replication factor A complex; cytoplasm; cytosol; DNA replicat…	GO:0000722, GO:0000723, GO:0000724, GO:0000781, GO:0000794, GO:0003676, GO:0003677, GO:0003684, GO:0003690, GO:0003697, GO:0003729, GO:0005515, GO:0005634, GO:0005662, GO:0005737, GO:0005829, GO:0006260, GO:0006261, GO:0006265, GO:0006268, GO:0006281, GO:0006289, GO:0006310, GO:0006312, GO:0007004, GO:0007131, GO:0010833, GO:0016567, GO:0030491, GO:0043047, GO:0043565, GO:0043934, GO:0045184, GO:…
A01p02430.1_BnaDAR	A01	1125658	1126587	6	***	Ubiquitin-conjugating enzyme E2	nucleotide binding; protein polyubiquitination; ubiquitin activating enzyme activity; ATP binding; nucleus; transferase activity; transferase activity, transferring acyl groups; ligase activity; proteasome-mediated ubiquitin-dependent protein catabolic process; ubiquitin conjugating enzyme activity	GO:0000166, GO:0000209, GO:0004839, GO:0005524, GO:0005634, GO:0016740, GO:0016746, GO:0016874, GO:0043161, GO:0061631
A01p02440.1_BnaDAR	A01	1129291	1132636	3	***	tRNA-2-methylthio-N(6)-dimethylallyladenosine synthase	catalytic activity; cytoplasm; tRNA modification; tRNA processing; transferase activity; methylthiotransferase activity; metal ion binding; iron-sulfur cluster binding; 4 iron, 4 sulfur cluster binding	GO:0003824, GO:0005737, GO:0006400, GO:0008033, GO:0016740, GO:0035596, GO:0046872, GO:0051536, GO:0051539
A01p02450.1_BnaDAR	A01	1135034	1140415	10	***	Cytochrome P450	monooxygenase activity; iron ion binding; leaf morphogenesis; brassinosteroid homeostasis; membrane; integral component of membrane; brassinosteroid biosynthetic process; oxidoreductase activity; oxidoreductase activity, acting on paired donors, with incorporation or reduction of molecular oxygen; oxidoreductase activity, acting on paired donors, with incorporation or reduction of molecular oxyge…	GO:0004497, GO:0005506, GO:0009965, GO:0010268, GO:0016020, GO:0016021, GO:0016132, GO:0016491, GO:0016705, GO:0016709, GO:0020037, GO:0042814, GO:0046872, GO:0048366, GO:0048441, GO:0048443, GO:0055114
A01p02460.1_BnaDAR	A01	1146549	1150964	18	***	Beta-galactosidase	hydrolase activity, hydrolyzing O-glycosyl compounds; beta-galactosidase activity; extracellular region; cell wall; vacuole; carbohydrate metabolic process; metabolic process; hydrolase activity; hydrolase activity, acting on glycosyl bonds; carbohydrate binding; apoplast	GO:0004553, GO:0004565, GO:0005576, GO:0005618, GO:0005773, GO:0005975, GO:0008152, GO:0016787, GO:0016798, GO:0030246, GO:0048046
A01p02470.1_BnaDAR	A01	1152772	1161659	35	***	MORC family CW-type zinc finger protein 4	endonuclease activity; nucleic acid phosphodiester bond hydrolysis	GO:0004519, GO:0090305
A01p02480.1_BnaDAR	A01	1166507	1168509	2	***	Protein SHI RELATED SEQUENCE 1	DNA binding; nucleus; multicellular organism development; pollen development; auxin-activated signaling pathway; auxin biosynthetic process; positive regulation of transcription, DNA-templated; metal ion binding; protein heterodimerization activity; anther development	GO:0003677, GO:0005634, GO:0007275, GO:0009555, GO:0009734, GO:0009851, GO:0045893, GO:0046872, GO:0046982, GO:0048653
A01p02490.1_BnaDAR	A01	1170631	1173259	9	***	Aldehyde dehydrogenase	3-chloroallyl aldehyde dehydrogenase activity; cellular aldehyde metabolic process; oxidoreductase activity; oxidoreductase activity, acting on the aldehyde or oxo group of donors, NAD or NADP as acceptor; oxidation-reduction process	GO:0004028, GO:0006081, GO:0016491, GO:0016620, GO:0055114
A01p02500.1_BnaDAR	A01	1176013	1176787	2	***	GATA transcription factor	DNA binding; nucleus; regulation of transcription, DNA-templated; zinc ion binding; sequence-specific DNA binding; positive regulation of transcription, DNA-templated; metal ion binding	GO:0003677, GO:0005634, GO:0006355, GO:0008270, GO:0043565, GO:0045893, GO:0046872
A01p02510.1_BnaDAR	A01	1177330	1178103	1	*-*	BnaA08g15190D protein	membrane; integral component of membrane	GO:0016020, GO:0016021
A01p02520.1_BnaDAR	A01	1180118	1181052	5	*-*	SWI/SNF complex subunit SWI3D	nucleus; zinc ion binding; metal ion binding	GO:0005634, GO:0008270, GO:0046872
A01p02530.1_BnaDAR	A01	1184185	1185558	3	---	Sulfatase	catalytic activity; sulfuric ester hydrolase activity; hydrolase activity	GO:0003824, GO:0008484, GO:0016787
A01p02540.1_BnaDAR	A01	1193798	1196080	3	***	Cytochrome P450	monooxygenase activity; iron ion binding; membrane; integral component of membrane; oxidoreductase activity; oxidoreductase activity, acting on paired donors, with incorporation or reduction of molecular oxygen; heme binding; metal ion binding; oxidation-reduction process	GO:0004497, GO:0005506, GO:0016020, GO:0016021, GO:0016491, GO:0016705, GO:0020037, GO:0046872, GO:0055114
A01p02550.1_BnaDAR	A01	1199754	1203926	15	***	Transmembrane and coiled-coil domain-containing protein 4	membrane; integral component of membrane	GO:0016020, GO:0016021
A01p02560.1_BnaDAR	A01	1204329	1206870	12	***	Serine carboxypeptidase S28 family protein	carboxypeptidase activity; vacuole; vacuolar membrane; proteolysis; serine-type peptidase activity; hydrolase activity	GO:0004180, GO:0005773, GO:0005774, GO:0006508, GO:0008236, GO:0016787
A01p02570.1_BnaDAR	A01	1207175	1211226	3	***	Receptor-like protein kinase	protein kinase activity; ATP binding; plasma membrane; protein phosphorylation; membrane; integral component of membrane; kinase activity; phosphorylation	GO:0004672, GO:0005524, GO:0005886, GO:0006468, GO:0016020, GO:0016021, GO:0016301, GO:0016310
A01p02580.1_BnaDAR	A01	1221019	1223009	3	***	NAC domain-containing protein	DNA binding; regulation of transcription, DNA-templated	GO:0003677, GO:0006355
A01p02590.1_BnaDAR	A01	1227030	1231484	5	***	Disease resistance protein	defense response; signal transduction; hydrolase activity; ADP binding; NAD(P)+ nucleosidase activity; NAD+ nucleotidase, cyclic ADP-ribose generating	GO:0006952, GO:0007165, GO:0016787, GO:0043531, GO:0050135, GO:0061809
A01p02600.1_BnaDAR	A01	1232035	1237511	7	***	Disease resistance protein (TIR-NBS-LRR class)	defense response; signal transduction; membrane; integral component of membrane; hydrolase activity; ubiquitin binding; ADP binding; NAD(P)+ nucleosidase activity; NAD+ nucleotidase, cyclic ADP-ribose generating	GO:0006952, GO:0007165, GO:0016020, GO:0016021, GO:0016787, GO:0043130, GO:0043531, GO:0050135, GO:0061809
A01p02610.1_BnaDAR	A01	1237648	1238953	2	***	Ribosomal protein L2	structural constituent of ribosome; ribosome; translation	GO:0003735, GO:0005840, GO:0006412
A01p02620.1_BnaDAR	A01	1240160	1243686	5	***	Filament-like plant protein 5	molecular_function; biological_process	GO:0003674, GO:0008150
A01p02630.1_BnaDAR	A01	1247389	1253418	3	***	Auxin-induced protein 15A	response to auxin; membrane; integral component of membrane	GO:0009733, GO:0016020, GO:0016021
A01p02640.1_BnaDAR	A01	1254337	1255896	3	***	Polyamine-modulated factor 1-binding protein	response to red or far red light; negative gravitropism	GO:0009639, GO:0009959
A01p02650.1_BnaDAR	A01	1256233	1258299	6	***	Oxidoreductase, 2OG-Fe(II) oxygenase family protein	oxidoreductase activity; oxidation-reduction process	GO:0016491, GO:0055114
A01p02660.1_BnaDAR	A01	1260313	1277116	34	***	transformation/transcription domain-associated protein-like	SAGA complex; nucleotide binding; transcription coregulator activity; ATP binding; nucleus; DNA repair; regulation of transcription, DNA-templated; protein phosphorylation; kinase activity; phosphorylation; transferase activity; NuA4 histone acetyltransferase complex; NA; NA	GO:0000124, GO:0000166, GO:0003712, GO:0005524, GO:0005634, GO:0006281, GO:0006355, GO:0006468, GO:0016301, GO:0016310, GO:0016740, GO:0035267, GO:0106310, GO:0106311
A01p02670.1_BnaDAR	A01	1277672	1277809	1	--*	Transcription factor bHLH121 like	nucleus; protein dimerization activity	GO:0005634, GO:0046983
A01p02680.1_BnaDAR	A01	1278486	1280962	10	***	DNA-(apurinic or apyrimidinic site) lyase	nuclease activity; DNA repair; cellular response to DNA damage stimulus; zinc ion binding; metal ion binding; nucleic acid phosphodiester bond hydrolysis	GO:0004518, GO:0006281, GO:0006974, GO:0008270, GO:0046872, GO:0090305
A01p02690.1_BnaDAR	A01	1283018	1283889	1	***	Chaperone protein dnaJ 11, chloroplastic	nucleus; chloroplast; plastid; chloroplast stroma	GO:0005634, GO:0009507, GO:0009536, GO:0009570
A01p02700.1_BnaDAR	A01	1290911	1292253	1	***	Cold shock domain protein 1	nucleic acid binding; zinc ion binding	GO:0003676, GO:0008270
A01p02710.1_BnaDAR	A01	1294670	1296153	2	***	Thaumatin-like protein	membrane; integral component of membrane	GO:0016020, GO:0016021
A01p02720.1_BnaDAR	A01	1296894	1298486	7	***	Calmodulin-lysine N-methyltransferase	nucleus; cytoplasm; methyltransferase activity; transferase activity; peptidyl-lysine methylation; calmodulin-lysine N-methyltransferase activity; methylation	GO:0005634, GO:0005737, GO:0008168, GO:0016740, GO:0018022, GO:0018025, GO:0032259
A01p02730.1_BnaDAR	A01	1298791	1299261	2	*-*	Proteasome endopeptidase complex	phosphorelay sensor kinase activity; phosphorelay signal transduction system; proteasome complex; proteasome core complex; proteolysis; signal transduction; peptidase activity; membrane; integral component of membrane; kinase activity; phosphorylation; transferase activity; transferase activity, transferring phosphorus-containing groups; hydrolase activity; proteasome core complex, alpha-subunit …	GO:0000155, GO:0000160, GO:0000502, GO:0005839, GO:0006508, GO:0007165, GO:0008233, GO:0016020, GO:0016021, GO:0016301, GO:0016310, GO:0016740, GO:0016772, GO:0016787, GO:0019773, GO:0023014, GO:0051603
A01p02740.1_BnaDAR	A01	1299369	1300936	8	***	Ascorbate peroxidase	peroxidase activity; response to oxidative stress; membrane; integral component of membrane; oxidoreductase activity; L-ascorbate peroxidase activity; heme binding; metal ion binding; oxidation-reduction process; cellular oxidant detoxification	GO:0004601, GO:0006979, GO:0016020, GO:0016021, GO:0016491, GO:0016688, GO:0020037, GO:0046872, GO:0055114, GO:0098869
A01p02750.1_BnaDAR	A01	1301849	1303396	6	***	Rac-like GTP-binding protein	GTPase activity; GTP binding; small GTPase mediated signal transduction	GO:0003924, GO:0005525, GO:0007264
A01p02760.1_BnaDAR	A01	1303836	1305406	3	***	At2g17787	molecular_function; biological_process	GO:0003674, GO:0008150
A01p02770.1_BnaDAR	A01	1308574	1308924	2	--*	Alpha-glucan water dikinase 1, putative	kinase activity; phosphorylation	GO:0016301, GO:0016310
A01p02780.1_BnaDAR	A01	1309251	1312340	10	***	Protein MID1-COMPLEMENTING ACTIVITY 1	calcium channel activity; plasma membrane; integral component of plasma membrane; calcium ion transport; osmosensory signaling pathway; membrane; integral component of membrane; carbohydrate homeostasis; calcium ion transmembrane transport; cellular response to mechanical stimulus	GO:0005262, GO:0005886, GO:0005887, GO:0006816, GO:0007231, GO:0016020, GO:0016021, GO:0033500, GO:0070588, GO:0071260
A01p02790.1_BnaDAR	A01	1316446	1317805	4	*-*	Pyrophosphate--fructose 6-phosphate 1-phosphotransferase subunit beta	catalytic activity; 6-phosphofructokinase activity; ATP binding; cytoplasm; cytosol; fructose 6-phosphate metabolic process; glycolytic process; metabolic process; phosphofructokinase activity; response to glucose; photosynthesis; kinase activity; phosphorylation; transferase activity; carbohydrate phosphorylation; metal ion binding; diphosphate-fructose-6-phosphate 1-phosphotransferase activity;…	GO:0003824, GO:0003872, GO:0005524, GO:0005737, GO:0005829, GO:0006002, GO:0006096, GO:0008152, GO:0008443, GO:0009749, GO:0015979, GO:0016301, GO:0016310, GO:0016740, GO:0046835, GO:0046872, GO:0047334, GO:0061615
A01p02800.1_BnaDAR	A01	1317811	1318122	1	--*	Selenocysteine insertion sequence-binding protein 2	selenocysteine incorporation; RNA binding; mRNA 3'-UTR binding; nucleus; cytosol; translation; translation factor activity, RNA binding; striatum development; selenocysteine insertion sequence binding; ribonucleoprotein complex binding; neuron development; positive regulation of selenocysteine incorporation; ribonucleoprotein complex; negative regulation of nuclear-transcribed mRNA catabolic proc…	GO:0001514, GO:0003723, GO:0003730, GO:0005634, GO:0005829, GO:0006412, GO:0008135, GO:0021756, GO:0035368, GO:0043021, GO:0048666, GO:1904571, GO:1990904, GO:2000623
A01p02810.1_BnaDAR	A01	1320460	1321850	2	***	Basic-leucine zipper (BZIP) transcription factor family protein	DNA-binding transcription factor activity; nucleus; regulation of transcription, DNA-templated; positive regulation of transcription, DNA-templated	GO:0003700, GO:0005634, GO:0006355, GO:0045893
A01p02820.1_BnaDAR	A01	1326818	1330176	6	***	La-related protein 1C	RNA binding	GO:0003723
A01p02830.1_BnaDAR	A01	1335483	1335686	1	--*	Eukaryotic translation initiation factor 5A-1	cytoplasmic translational elongation; cytoplasmic translational termination; RNA binding; translation elongation factor activity; nucleus; nucleolus; cytoplasm; cytosol; translation; translational elongation; translation termination factor activity; cytosolic ribosome; ribosome binding; positive regulation of translational elongation; positive regulation of translational termination	GO:0002182, GO:0002184, GO:0003723, GO:0003746, GO:0005634, GO:0005730, GO:0005737, GO:0005829, GO:0006412, GO:0006414, GO:0008079, GO:0022626, GO:0043022, GO:0045901, GO:0045905
A01p02840.1_BnaDAR	A01	1335775	1336221	1	--*	ubiquitin family protein	0
A01p02850.1_BnaDAR	A01	1336943	1339532	10	***	aspartyl protease family protein 1-like	aspartic-type endopeptidase activity; proteolysis; peptidase activity; hydrolase activity	GO:0004190, GO:0006508, GO:0008233, GO:0016787
A01p02860.1_BnaDAR	A01	1340787	1342623	6	***	Ras-related protein like	GTPase activity; GTP binding	GO:0003924, GO:0005525
A01p02870.1_BnaDAR	A01	1342541	1345677	12	***	Pentatricopeptide repeat-containing protein	mRNA binding; mitochondrion	GO:0003729, GO:0005739
A01p02880.1_BnaDAR	A01	1347070	1348537	5	***	RING/U-box superfamily protein	membrane; integral component of membrane	GO:0016020, GO:0016021
A01p02890.1_BnaDAR	A01	1351835	1379396	43	***	DNA-directed RNA polymerase subunit	nuclear chromatin; RNA polymerase II activity; transcription, RNA-templated; DNA binding; DNA-directed 5'-3' RNA polymerase activity; RNA-directed 5'-3' RNA polymerase activity; nucleus; RNA polymerase II, core complex; transcription, DNA-templated; transcription by RNA polymerase II; transferase activity; nucleotidyltransferase activity; translesion synthesis; metal ion binding	GO:0000790, GO:0001055, GO:0001172, GO:0003677, GO:0003899, GO:0003968, GO:0005634, GO:0005665, GO:0006351, GO:0006366, GO:0016740, GO:0016779, GO:0019985, GO:0046872
A01p02900.1_BnaDAR	A01	1356923	1358569	5	***	Prolyl 4-hydroxylase alpha-like protein	iron ion binding; endoplasmic reticulum; oxidoreductase activity; oxidoreductase activity, acting on paired donors, with incorporation or reduction of molecular oxygen; peptidyl-proline hydroxylation to 4-hydroxy-L-proline; L-ascorbic acid binding; metal ion binding; dioxygenase activity; oxidation-reduction process	GO:0005506, GO:0005783, GO:0016491, GO:0016705, GO:0018401, GO:0031418, GO:0046872, GO:0051213, GO:0055114
A01p02910.1_BnaDAR	A01	1360670	1362390	6	***	Prolyl 4-hydroxylase alpha-like protein	procollagen-proline 4-dioxygenase activity; iron ion binding; endosome; endoplasmic reticulum; Golgi apparatus; trans-Golgi network; membrane; integral component of membrane; oxidoreductase activity; oxidoreductase activity, acting on paired donors, with incorporation or reduction of molecular oxygen; peptidyl-proline hydroxylation to 4-hydroxy-L-proline; L-ascorbic acid binding; metal ion bindin…	GO:0004656, GO:0005506, GO:0005768, GO:0005783, GO:0005794, GO:0005802, GO:0016020, GO:0016021, GO:0016491, GO:0016705, GO:0018401, GO:0031418, GO:0046872, GO:0051213, GO:0055114
A01p02920.1_BnaDAR	A01	1362996	1364632	6	***	Prolyl 4-hydroxylase alpha-like protein	procollagen-proline 4-dioxygenase activity; iron ion binding; endoplasmic reticulum; membrane; integral component of membrane; oxidoreductase activity; oxidoreductase activity, acting on paired donors, with incorporation or reduction of molecular oxygen; peptidyl-proline hydroxylation to 4-hydroxy-L-proline; L-ascorbic acid binding; metal ion binding; dioxygenase activity; oxidation-reduction pro…	GO:0004656, GO:0005506, GO:0005783, GO:0016020, GO:0016021, GO:0016491, GO:0016705, GO:0018401, GO:0031418, GO:0046872, GO:0051213, GO:0055114
A01p02930.1_BnaDAR	A01	1379459	1379897	1	***	RTFL6	0
A01p02940.1_BnaDAR	A01	1382801	1383857	5	***	Rhodanese-related sulfurtransferase	thiosulfate sulfurtransferase activity; transferase activity	GO:0004792, GO:0016740
A01p02950.1_BnaDAR	A01	1384169	1386396	7	***	Vitamin K epoxide reductase	membrane; integral component of membrane; oxidoreductase activity; quinone binding; oxidation-reduction process	GO:0016020, GO:0016021, GO:0016491, GO:0048038, GO:0055114
A01p02960.1_BnaDAR	A01	1386941	1387717	3	*-*	Ganglioside-induced differentiation-associated-protein 2	response to retinoic acid	GO:0032526
A01p02970.1_BnaDAR	A01	1388563	1390779	7	***	Regulator of Vps4 activity in the MVB pathway protein	mitochondrion; protein localization; protein transport	GO:0005739, GO:0008104, GO:0015031
A01p02980.1_BnaDAR	A01	1392082	1392916	2	***	Eukaryotic translation initiation factor 3 subunit A, putative	translation initiation factor activity; translational initiation	GO:0003743, GO:0006413
A01p02990.1_BnaDAR	A01	1394628	1395386	1	*-*	Zinc finger family protein	pollen sperm cell differentiation	GO:0048235
A01p03000.1_BnaDAR	A01	1396216	1397061	1	***	Eukaryotic translation initiation factor 3 subunit A, putative	translation initiation factor activity; translational initiation	GO:0003743, GO:0006413
A01p03010.1_BnaDAR	A01	1398959	1399852	1	***	At3g51410	molecular_function; cellular_component	GO:0003674, GO:0005575
A01p03020.1_BnaDAR	A01	1404979	1405776	1	***	Zinc finger (C2H2 type) family protein	DNA-binding transcription factor activity; mRNA binding; protein binding; nucleus; regulation of transcription, DNA-templated	GO:0003700, GO:0003729, GO:0005515, GO:0005634, GO:0006355
A01p03030.1_BnaDAR	A01	1406196	1409604	6	***	Protein kinase superfamily protein	nucleotide binding; protein kinase activity; protein serine/threonine kinase activity; protein binding; ATP binding; plasma membrane; protein phosphorylation; abscission; kinase activity; phosphorylation; transferase activity	GO:0000166, GO:0004672, GO:0004674, GO:0005515, GO:0005524, GO:0005886, GO:0006468, GO:0009838, GO:0016301, GO:0016310, GO:0016740
A01p03040.1_BnaDAR	A01	1414817	1416824	5	***	RWP-RK domain-containing protein	nucleus	GO:0005634
A01p03050.1_BnaDAR	A01	1417709	1422618	7	***	High mobility group protein 2	DNA binding; nucleus	GO:0003677, GO:0005634
A01p03060.1_BnaDAR	A01	1425543	1427148	3	***	WUSCHEL-related homeobox 13	DNA binding; DNA-binding transcription factor activity; nucleus; regulation of transcription, DNA-templated; multicellular organism development	GO:0003677, GO:0003700, GO:0005634, GO:0006355, GO:0007275
A01p03070.1_BnaDAR	A01	1426993	1428565	1	***	Transcription factor IIIB subunit	DNA-templated transcription, initiation; transcription preinitiation complex assembly	GO:0006352, GO:0070897
A01p03080.1_BnaDAR	A01	1428986	1430701	5	***	Phosphatidylinositol N-acetylglucosaminyltransferase subunit H	GPI anchor biosynthetic process; membrane; integral component of membrane; transferase activity; transferase activity, transferring glycosyl groups; phosphatidylinositol N-acetylglucosaminyltransferase activity	GO:0006506, GO:0016020, GO:0016021, GO:0016740, GO:0016757, GO:0017176
A01p03090.1_BnaDAR	A01	1431912	1432679	1	---	Serine/threonine-protein phosphatase BSL3	phosphoprotein phosphatase activity; protein serine/threonine phosphatase activity; nucleus; peroxisome; cytosol; plasma membrane; protein dephosphorylation; brassinosteroid mediated signaling pathway; hydrolase activity; metal ion binding; protein serine phosphatase activity; protein threonine phosphatase activity	GO:0004721, GO:0004722, GO:0005634, GO:0005777, GO:0005829, GO:0005886, GO:0006470, GO:0009742, GO:0016787, GO:0046872, GO:0106306, GO:0106307
A01p03100.1_BnaDAR	A01	1436807	1438658	2	***	Kinase family protein	nucleotide binding; protein kinase activity; protein serine/threonine kinase activity; ATP binding; protein phosphorylation; kinase activity; phosphorylation; transferase activity	GO:0000166, GO:0004672, GO:0004674, GO:0005524, GO:0006468, GO:0016301, GO:0016310, GO:0016740
A01p03110.1_BnaDAR	A01	1442850	1443710	1	***	RING-H2 finger protein ATL45	membrane; integral component of membrane	GO:0016020, GO:0016021
A01p03120.1_BnaDAR	A01	1448528	1450817	2	***	Plant intracellular Ras-group-related LRR protein 4	plasma membrane	GO:0005886
A01p03130.1_BnaDAR	A01	1453132	1455311	9	***	Ankyrin repeat domain protein, putative	chloroplast targeting sequence binding; integral component of chloroplast outer membrane; protein targeting to chloroplast	GO:0030941, GO:0031359, GO:0045036
A01p03140.1_BnaDAR	A01	1455706	1461283	11	***	Chloride channel protein	voltage-gated chloride channel activity; ion transport; chloride transport; chloroplast thylakoid membrane; membrane; integral component of membrane; transmembrane transport; chloride transmembrane transport	GO:0005247, GO:0006811, GO:0006821, GO:0009535, GO:0016020, GO:0016021, GO:0055085, GO:1902476
A01p03150.1_BnaDAR	A01	1461442	1463161	2	***	F-box family protein	cytoplasm	GO:0005737
A01p03160.1_BnaDAR	A01	1463887	1465093	6	***	AP complex subunit sigma	intracellular protein transport; protein transport; vesicle-mediated transport; membrane coat; intracellular membrane-bounded organelle	GO:0006886, GO:0015031, GO:0016192, GO:0030117, GO:0043231
A01p03170.1_BnaDAR	A01	1467900	1469229	1	***	AT-hook motif nuclear-localized protein	DNA binding; minor groove of adenine-thymine-rich DNA binding; DNA-binding transcription factor activity; nucleus; regulation of transcription, DNA-templated; vegetative to reproductive phase transition of meristem	GO:0003677, GO:0003680, GO:0003700, GO:0005634, GO:0006355, GO:0010228
A01p03180.1_BnaDAR	A01	1472022	1478786	11	***	Brefeldin A-inhibited guanine nucleotide-exchange protein	guanyl-nucleotide exchange factor activity; ARF guanyl-nucleotide exchange factor activity; trans-Golgi network; cytosol; protein transport; membrane; regulation of ARF protein signal transduction	GO:0005085, GO:0005086, GO:0005802, GO:0005829, GO:0015031, GO:0016020, GO:0032012
A01p03190.1_BnaDAR	A01	1480287	1481200	5	*-*	periodic tryptophan protein 1 homolog	nucleus	GO:0005634
A01p03200.1_BnaDAR	A01	1481627	1483993	12	***	Pantothenate kinase	kinase activity; phosphorylation	GO:0016301, GO:0016310
A01p03210.1_BnaDAR	A01	1484125	1485413	4	***	Cysteine proteinase	proteolysis; peptidase activity; cysteine-type peptidase activity; hydrolase activity	GO:0006508, GO:0008233, GO:0008234, GO:0016787
A01p03220.1_BnaDAR	A01	1485741	1488390	15	***	CMP-sialic acid transporter-like protein	Golgi membrane; pyrimidine nucleotide-sugar transmembrane transporter activity; membrane; integral component of membrane; pyrimidine nucleotide-sugar transmembrane transport	GO:0000139, GO:0015165, GO:0016020, GO:0016021, GO:0090481
A01p03230.1_BnaDAR	A01	1489118	1489543	1	--*	ATP-dependent helicase/nuclease subunit A	nucleotide binding; double-strand break repair via homologous recombination; DNA binding; DNA helicase activity; double-stranded DNA binding; helicase activity; nuclease activity; exonuclease activity; ATP binding; DNA repair; double-strand break repair; cellular response to DNA damage stimulus; 3'-5' exonuclease activity; hydrolase activity; DNA duplex unwinding; nucleic acid phosphodiester bond…	GO:0000166, GO:0000724, GO:0003677, GO:0003678, GO:0003690, GO:0004386, GO:0004518, GO:0004527, GO:0005524, GO:0006281, GO:0006302, GO:0006974, GO:0008408, GO:0016787, GO:0032508, GO:0090305
A01p03240.1_BnaDAR	A01	1492816	1496037	7	***	Calcium-dependent protein kinase	nucleotide binding; protein kinase activity; calcium ion binding; ATP binding; protein phosphorylation; kinase activity; phosphorylation; transferase activity; metal ion binding	GO:0000166, GO:0004672, GO:0005509, GO:0005524, GO:0006468, GO:0016301, GO:0016310, GO:0016740, GO:0046872
A01p03250.1_BnaDAR	A01	1499471	1502885	6	***	Monosaccharide-sensing protein 2	vacuole; vacuolar membrane; Golgi apparatus; plasma membrane; carbohydrate transport; membrane; integral component of membrane; transmembrane transporter activity; transmembrane transport	GO:0005773, GO:0005774, GO:0005794, GO:0005886, GO:0008643, GO:0016020, GO:0016021, GO:0022857, GO:0055085
A01p03260.1_BnaDAR	A01	1503233	1506110	4	***	Glutamate receptor	plasma membrane; ion transport; ligand-gated ion channel activity; membrane; integral component of membrane; ion transmembrane transport; signaling receptor activity	GO:0005886, GO:0006811, GO:0015276, GO:0016020, GO:0016021, GO:0034220, GO:0038023
A01p03270.1_BnaDAR	A01	1508194	1510804	7	***	Ubiquitin domain-containing protein DSK2b	protein binding; nucleus; cytoplasm; mitochondrion; cytosol; ubiquitin-dependent protein catabolic process; polyubiquitin modification-dependent protein binding	GO:0005515, GO:0005634, GO:0005737, GO:0005739, GO:0005829, GO:0006511, GO:0031593
A01p03280.1_BnaDAR	A01	1511193	1512020	1	***	Zinc finger family protein	pollen sperm cell differentiation	GO:0048235
A01p03290.1_BnaDAR	A01	1518447	1523954	5	***	Plant regulator RWP-RK family protein, putative isoform 1	nucleus	GO:0005634
A01p03300.1_BnaDAR	A01	1525031	1527323	4	***	Isocitrate dehydrogenase, putative	isocitrate dehydrogenase (NAD+) activity; mitochondrion; tricarboxylic acid cycle; isocitrate metabolic process; oxidoreductase activity; oxidoreductase activity, acting on the CH-OH group of donors, NAD or NADP as acceptor; oxidation-reduction process	GO:0004449, GO:0005739, GO:0006099, GO:0006102, GO:0016491, GO:0016616, GO:0055114
A01p03310.1_BnaDAR	A01	1527413	1530194	12	***	Glycerol-3-phosphate acyltransferase 3	membrane; integral component of membrane; transferase activity; transferase activity, transferring acyl groups	GO:0016020, GO:0016021, GO:0016740, GO:0016746
A01p03320.1_BnaDAR	A01	1540296	1543549	4	***	DNA-directed RNA polymerase subunit beta, putative (DUF630 and DUF632)	DNA-directed 5'-3' RNA polymerase activity; plasma membrane; RNA biosynthetic process	GO:0003899, GO:0005886, GO:0032774
A01p03330.1_BnaDAR	A01	1545220	1548363	9	***	Kinase family protein	protein kinase activity; ATP binding; protein phosphorylation; kinase activity; phosphorylation	GO:0004672, GO:0005524, GO:0006468, GO:0016301, GO:0016310
A01p03340.1_BnaDAR	A01	1548428	1548938	3	--*	BnaC01g19230D protein	microtubule; multicellular organism development; microtubule binding; unidimensional cell growth; cortical microtubule, transverse to long axis; circumnutation	GO:0005874, GO:0007275, GO:0008017, GO:0009826, GO:0010005, GO:0010031
A01p03350.1_BnaDAR	A01	1549431	1559140	12	*-*	E3 ubiquitin-protein ligase MARCH6	membrane; integral component of membrane	GO:0016020, GO:0016021
A01p03360.1_BnaDAR	A01	1561383	1561945	2	--*	Phenylalanine--tRNA ligase subunit alpha	tRNA binding; nucleotide binding; magnesium ion binding; aminoacyl-tRNA ligase activity; phenylalanine-tRNA ligase activity; ATP binding; cytoplasm; translation; phenylalanyl-tRNA aminoacylation; ligase activity; tRNA aminoacylation; metal ion binding	GO:0000049, GO:0000166, GO:0000287, GO:0004812, GO:0004826, GO:0005524, GO:0005737, GO:0006412, GO:0006432, GO:0016874, GO:0043039, GO:0046872
A01p03370.1_BnaDAR	A01	1562111	1563595	6	***	Kynurenine formamidase	arylformamidase activity; tryptophan catabolic process to kynurenine	GO:0004061, GO:0019441
A01p03380.1_BnaDAR	A01	1564072	1565382	7	***	Cytokinin riboside 5'-monophosphate phosphoribohydrolase	nucleus; cytosol; cytokinin biosynthetic process; hydrolase activity; hydrolase activity, hydrolyzing N-glycosyl compounds	GO:0005634, GO:0005829, GO:0009691, GO:0016787, GO:0016799
A01p03390.1_BnaDAR	A01	1571052	1573094	5	***	Lysine histidine transporter-like 7	amino acid transport; membrane; integral component of membrane	GO:0006865, GO:0016020, GO:0016021
A01p03400.1_BnaDAR	A01	1574801	1577006	5	***	DDB1- and CUL4-associated factor 8-like	cytoplasm; Cul4-RING E3 ubiquitin ligase complex	GO:0005737, GO:0080008
A01p03410.1_BnaDAR	A01	1577559	1580082	1	***	Pentatricopeptide repeat-containing protein	zinc ion binding	GO:0008270
A01p03420.1_BnaDAR	A01	1580176	1584966	2	***	Kelch repeat-containing F-box family protein	ubiquitin-dependent protein catabolic process	GO:0006511
A01p03430.1_BnaDAR	A01	1589416	1590803	2	***	Phospholipase-like protein (PEARLI 4) family protein	nuclear chromosome; chromatin; nuclear chromatin; chromatin binding; nucleus; double-strand break repair; mitotic sister chromatid cohesion; mitotic chromosome condensation; establishment of mitotic sister chromatid cohesion; rDNA condensation; establishment of protein localization to chromatin; transcriptional activation by promoter-enhancer looping; response to karrikin; Scc2-Scc4 cohesin loadi…	GO:0000228, GO:0000785, GO:0000790, GO:0003682, GO:0005634, GO:0006302, GO:0007064, GO:0007076, GO:0034087, GO:0070550, GO:0071169, GO:0071733, GO:0080167, GO:0090694, GO:1905406, GO:1990414
A01p03440.1_BnaDAR	A01	1591376	1591759	1	--*	DNA polymerase theta (Polymerase domain only)	DNA binding; DNA-directed DNA polymerase activity; DNA replication; DNA-dependent DNA replication; DNA biosynthetic process	GO:0003677, GO:0003887, GO:0006260, GO:0006261, GO:0071897
A01p03450.1_BnaDAR	A01	1594428	1595964	4	***	Aquaporin	channel activity; membrane; integral component of membrane; transmembrane transport	GO:0015267, GO:0016020, GO:0016021, GO:0055085
A01p03460.1_BnaDAR	A01	1602091	1602303	1	--*	Photosystem I reaction center subunit XI	photosystem I; photosystem I reaction center; thylakoid; photosynthesis; membrane; integral component of membrane; thylakoid membrane	GO:0009522, GO:0009538, GO:0009579, GO:0015979, GO:0016020, GO:0016021, GO:0042651
A01p03470.1_BnaDAR	A01	1603956	1606139	7	***	Catalase	catalase activity; peroxidase activity; response to oxidative stress; oxidoreductase activity; heme binding; hydrogen peroxide catabolic process; metal ion binding; oxidation-reduction process; cellular oxidant detoxification	GO:0004096, GO:0004601, GO:0006979, GO:0016491, GO:0020037, GO:0042744, GO:0046872, GO:0055114, GO:0098869
A01p03480.1_BnaDAR	A01	1606676	1608500	2	***	High-affinity nickel-transport family protein	chloroplast; chloroplast organization; membrane; integral component of membrane; leaf development; plant ovule development	GO:0009507, GO:0009658, GO:0016020, GO:0016021, GO:0048366, GO:0048481
A01p03490.1_BnaDAR	A01	1611733	1612753	2	***	E3 ubiquitin-protein ligase BOI	metal ion binding	GO:0046872
A01p03500.1_BnaDAR	A01	1618322	1619005	3	--*	ATP-dependent DNA helicase	nucleotide binding; telomere maintenance; DNA helicase activity; helicase activity; ATP binding; DNA repair; DNA recombination; cellular response to DNA damage stimulus; hydrolase activity; DNA duplex unwinding	GO:0000166, GO:0000723, GO:0003678, GO:0004386, GO:0005524, GO:0006281, GO:0006310, GO:0006974, GO:0016787, GO:0032508
A01p03510.1_BnaDAR	A01	1626213	1627147	2	***	Heavy metal-associated isoprenylated plant protein	metal ion transport; metal ion binding	GO:0030001, GO:0046872
A01p03520.1_BnaDAR	A01	1629929	1630722	2	***	Basic-leucine zipper transcription factor	DNA-binding transcription factor activity; regulation of transcription, DNA-templated	GO:0003700, GO:0006355
A01p03530.1_BnaDAR	A01	1643560	1645545	6	***	Protein kinase-like protein	protein kinase activity; ATP binding; protein phosphorylation; kinase activity; phosphorylation	GO:0004672, GO:0005524, GO:0006468, GO:0016301, GO:0016310
A01p03540.1_BnaDAR	A01	1647848	1649405	7	***	Rac-like GTP-binding protein	GTPase activity; GTP binding; small GTPase mediated signal transduction	GO:0003924, GO:0005525, GO:0007264
A01p03550.1_BnaDAR	A01	1651103	1655137	17	***	Beta-galactosidase	hydrolase activity, hydrolyzing O-glycosyl compounds; beta-galactosidase activity; extracellular region; cell wall; vacuole; carbohydrate metabolic process; metabolic process; hydrolase activity; hydrolase activity, acting on glycosyl bonds; carbohydrate binding; apoplast	GO:0004553, GO:0004565, GO:0005576, GO:0005618, GO:0005773, GO:0005975, GO:0008152, GO:0016787, GO:0016798, GO:0030246, GO:0048046
A01p03560.1_BnaDAR	A01	1658956	1660032	2	***	MYB transcription factor	nucleus	GO:0005634
A01p03570.1_BnaDAR	A01	1661649	1662589	3	***	Actin depolymerizing factor	actin binding; actin cytoskeleton; actin filament depolymerization	GO:0003779, GO:0015629, GO:0030042
A01p03580.1_BnaDAR	A01	1665714	1667645	7	***	Peptidyl-prolyl cis-trans isomerase	protein peptidyl-prolyl isomerization; peptidyl-prolyl cis-trans isomerase activity; cytoplasm; protein folding; cyclosporin A binding; isomerase activity; intracellular membrane-bounded organelle	GO:0000413, GO:0003755, GO:0005737, GO:0006457, GO:0016018, GO:0016853, GO:0043231
A01p03590.1_BnaDAR	A01	1672513	1675076	3	***	protein NUCLEAR FUSION DEFECTIVE 4-like	membrane; integral component of membrane	GO:0016020, GO:0016021
A01p03600.1_BnaDAR	A01	1675654	1677660	1	***	Armadillo repeat only 1	nucleus; cytoplasm; pollen tube growth; actin cytoskeleton organization; pollen tube tip	GO:0005634, GO:0005737, GO:0009860, GO:0030036, GO:0090404
A01p03610.1_BnaDAR	A01	1679181	1682433	13	***	ATP dependent RNA helicase	nucleotide binding; nucleic acid binding; RNA binding; helicase activity; ATP binding; nucleolus; hydrolase activity	GO:0000166, GO:0003676, GO:0003723, GO:0004386, GO:0005524, GO:0005730, GO:0016787
A01p03620.1_BnaDAR	A01	1682709	1689225	14	***	Xanthine dehydrogenase, putative	xanthine oxidase activity; iron ion binding; electron transfer activity; oxidoreductase activity; electron transport chain; metal ion binding; flavin adenine dinucleotide binding; iron-sulfur cluster binding; 2 iron, 2 sulfur cluster binding; oxidation-reduction process; FAD binding	GO:0004855, GO:0005506, GO:0009055, GO:0016491, GO:0022900, GO:0046872, GO:0050660, GO:0051536, GO:0051537, GO:0055114, GO:0071949
A01p03630.1_BnaDAR	A01	1689234	1690027	2	*-*	Glutamyl-trna(Gln) amidotransferase subunit a, chloroplasticmitochondrial	transferase activity	GO:0016740
A01p03640.1_BnaDAR	A01	1690095	1692133	6	*-*	Glutamyl-tRNA(Gln) amidotransferase subunit A	transferase activity; ligase activity; glutaminyl-tRNA synthase (glutamine-hydrolyzing) activity	GO:0016740, GO:0016874, GO:0050567
A01p03650.1_BnaDAR	A01	1693010	1693681	3	*-*	Glycosyl transferase	transferase activity; transferase activity, transferring glycosyl groups	GO:0016740, GO:0016757
A01p03660.1_BnaDAR	A01	1697342	1698156	1	***	Peptidyl-prolyl cis-trans isomerase	protein peptidyl-prolyl isomerization; peptidyl-prolyl cis-trans isomerase activity; protein folding; isomerase activity	GO:0000413, GO:0003755, GO:0006457, GO:0016853
A01p03670.1_BnaDAR	A01	1704984	1707782	5	***	Alkaline/neutral invertase	beta-fructofuranosidase activity; sucrose alpha-glucosidase activity; carbohydrate metabolic process; sucrose catabolic process; metabolic process; hydrolase activity; hydrolase activity, acting on glycosyl bonds; glycopeptide alpha-N-acetylgalactosaminidase activity	GO:0004564, GO:0004575, GO:0005975, GO:0005987, GO:0008152, GO:0016787, GO:0016798, GO:0033926
A01p03680.1_BnaDAR	A01	1707797	1709150	3	***	Chalcone synthase family protein	biosynthetic process; transferase activity; transferase activity, transferring acyl groups; transferase activity, transferring acyl groups other than amino-acyl groups	GO:0009058, GO:0016740, GO:0016746, GO:0016747
A01p03690.1_BnaDAR	A01	1709843	1715886	18	***	Pentatricopeptide repeat-containing protein, putative	chloroplast; membrane; integral component of membrane; mRNA stabilization	GO:0009507, GO:0016020, GO:0016021, GO:0048255
A01p03700.1_BnaDAR	A01	1715918	1716487	1	***	Auxin-responsive family protein	response to auxin	GO:0009733
A01p03710.1_BnaDAR	A01	1718463	1719170	1	***	Auxin-responsive family protein	response to auxin	GO:0009733
A01p03720.1_BnaDAR	A01	1720916	1721233	1	***	Auxin-responsive family protein	response to auxin	GO:0009733
A01p03730.1_BnaDAR	A01	1724632	1725120	2	***	Auxin-responsive family protein	response to auxin	GO:0009733
A01p03740.1_BnaDAR	A01	1734700	1735160	3	--*	Movement protein	RNA binding; membrane; viral process; viral capsid; host cell membrane; transport of virus in host, cell to cell	GO:0003723, GO:0016020, GO:0016032, GO:0019028, GO:0033644, GO:0046740
A01p03750.1_BnaDAR	A01	1739035	1739882	3	--*	Glutamate--glyoxylate aminotransferase 2	mRNA binding; catalytic activity; L-alanine:2-oxoglutarate aminotransferase activity; mitochondrion; peroxisome; cytosol; alanine-glyoxylate transaminase activity; transaminase activity; biosynthetic process; chloroplast; chloroplast stroma; photorespiration; transferase activity; pyridoxal phosphate binding; L-alanine catabolic process; glycine:2-oxoglutarate aminotransferase activity	GO:0003729, GO:0003824, GO:0004021, GO:0005739, GO:0005777, GO:0005829, GO:0008453, GO:0008483, GO:0009058, GO:0009507, GO:0009570, GO:0009853, GO:0016740, GO:0030170, GO:0042853, GO:0047958
A01p03760.1_BnaDAR	A01	1744278	1745032	1	***	Auxin-induced protein 15A	response to auxin	GO:0009733
A01p03770.1_BnaDAR	A01	1751410	1752345	1	***	SAUR-like auxin-responsive protein family	response to auxin	GO:0009733
A01p03780.1_BnaDAR	A01	1753491	1758332	7	***	Amidophosphoribosyltransferase	amidophosphoribosyltransferase activity; cytoplasm; purine nucleotide biosynthetic process; ""'de novo' IMP biosynthetic process; purine nucleobase biosynthetic process; nucleoside metabolic process; transferase activity; transferase activity, transferring glycosyl groups; metal ion binding; iron-sulfur cluster binding	GO:0004044, GO:0005737, GO:0006164, GO:0006189, GO:0009113, GO:0009116, GO:0016740, GO:0016757, GO:0046872, GO:0051536
A01p03790.1_BnaDAR	A01	1761698	1765549	3	***	Arginine decarboxylase	catalytic activity; arginine catabolic process; spermidine biosynthetic process; arginine decarboxylase activity; lyase activity; carboxy-lyase activity; putrescine biosynthetic process from arginine	GO:0003824, GO:0006527, GO:0008295, GO:0008792, GO:0016829, GO:0016831, GO:0033388
A01p03800.1_BnaDAR	A01	1767237	1771112	2	***	Arginine decarboxylase	catalytic activity; arginine catabolic process; spermidine biosynthetic process; arginine decarboxylase activity; lyase activity; carboxy-lyase activity; putrescine biosynthetic process from arginine	GO:0003824, GO:0006527, GO:0008295, GO:0008792, GO:0016829, GO:0016831, GO:0033388
A01p03810.1_BnaDAR	A01	1771189	1772760	6	***	NADH dehydrogenase [ubiquinone] 1 beta subcomplex subunit 9	mitochondrion; mitochondrial inner membrane; mitochondrial respiratory chain complex I; vacuolar membrane; plasma membrane; carbohydrate metabolic process; mitochondrial electron transport, NADH to ubiquinone; photorespiration; membrane; mitochondrial membrane; respiratory chain complex I; oxidation-reduction process; respirasome	GO:0005739, GO:0005743, GO:0005747, GO:0005774, GO:0005886, GO:0005975, GO:0006120, GO:0009853, GO:0016020, GO:0031966, GO:0045271, GO:0055114, GO:0070469
A01p03820.1_BnaDAR	A01	1773683	1775079	2	***	GATA transcription factor	DNA binding; nucleus; regulation of transcription, DNA-templated; zinc ion binding; cell differentiation; sequence-specific DNA binding; positive regulation of transcription, DNA-templated; metal ion binding	GO:0003677, GO:0005634, GO:0006355, GO:0008270, GO:0030154, GO:0043565, GO:0045893, GO:0046872
A01p03830.1_BnaDAR	A01	1777186	1778667	7	***	40S ribosomal protein S3a	structural constituent of ribosome; cytoplasm; cytosol; ribosome; translation; cytosolic small ribosomal subunit	GO:0003735, GO:0005737, GO:0005829, GO:0005840, GO:0006412, GO:0022627
A01p03840.1_BnaDAR	A01	1779129	1781828	10	***	SH3 domain-containing protein 2	autophagosome membrane; protein binding; nucleus; cytoplasm; endosome; late endosome; cytosol; plasma membrane; cell plate; cell plate formation involved in plant-type cell wall biogenesis; membrane; clathrin-coated vesicle; cytoplasmic vesicle; ubiquitin binding; clathrin-dependent endocytosis	GO:0000421, GO:0005515, GO:0005634, GO:0005737, GO:0005768, GO:0005770, GO:0005829, GO:0005886, GO:0009504, GO:0009920, GO:0016020, GO:0030136, GO:0031410, GO:0043130, GO:0072583
A01p03850.1_BnaDAR	A01	1782220	1788951	25	***	Squalene synthase	farnesyl-diphosphate farnesyltransferase activity; endoplasmic reticulum; isoprenoid biosynthetic process; lipid biosynthetic process; biosynthetic process; membrane; integral component of membrane; transferase activity; transferase activity, transferring alkyl or aryl (other than methyl) groups; squalene synthase activity	GO:0004310, GO:0005783, GO:0008299, GO:0008610, GO:0009058, GO:0016020, GO:0016021, GO:0016740, GO:0016765, GO:0051996
A01p03860.1_BnaDAR	A01	1789810	1790963	1	***	Prostatic spermine-binding-like protein	biological_process	GO:0008150
A01p03870.1_BnaDAR	A01	1791508	1792803	3	***	30S ribosomal protein S16	structural constituent of ribosome; ribosome; translation; chloroplast	GO:0003735, GO:0005840, GO:0006412, GO:0009507
A01p03880.1_BnaDAR	A01	1794298	1794855	3	***	Protein CASPARIAN STRIP INTEGRITY FACTOR 1	hormone activity; protein binding; signal transduction; multicellular organism development; response to iron ion; response to acidic pH; Casparian strip; ion homeostasis; iron ion homeostasis; cell wall organization; regulation of root morphogenesis	GO:0005179, GO:0005515, GO:0007165, GO:0007275, GO:0010039, GO:0010447, GO:0048226, GO:0050801, GO:0055072, GO:0071555, GO:2000067
A01p03890.1_BnaDAR	A01	1796346	1799249	3	--*	Transporter major facilitator superfamily MFS_1	carbohydrate:proton symporter activity; plasma membrane; carbohydrate transport; membrane; integral component of membrane; transmembrane transporter activity; carbohydrate transmembrane transport; transmembrane transport; proton transmembrane transport	GO:0005351, GO:0005886, GO:0008643, GO:0016020, GO:0016021, GO:0022857, GO:0034219, GO:0055085, GO:1902600
A01p03900.1_BnaDAR	A01	1801829	1811376	2	***	BZIP transcription factor	DNA-binding transcription factor activity; regulation of transcription, DNA-templated	GO:0003700, GO:0006355
A01p03910.1_BnaDAR	A01	1811979	1815767	13	***	Phosphatidylinositol/phosphatidylcholine transfer protein SFH1	Golgi membrane; Golgi apparatus; plasma membrane; cell tip growth; root epidermal cell differentiation; protein transport; membrane; root hair tip; root hair elongation; root hair cell tip growth	GO:0000139, GO:0005794, GO:0005886, GO:0009932, GO:0010053, GO:0015031, GO:0016020, GO:0035619, GO:0048767, GO:0048768
A01p03920.1_BnaDAR	A01	1816930	1819655	10	***	Bifunctional dihydrofolate reductase-thymidylate synthase	catalytic activity; dihydrofolate reductase activity; thymidylate synthase activity; mitochondrion; cytosol; dTMP biosynthetic process; one-carbon metabolic process; metabolic process; methyltransferase activity; nucleotide biosynthetic process; oxidoreductase activity; transferase activity; methylation; tetrahydrofolate biosynthetic process; oxidation-reduction process	GO:0003824, GO:0004146, GO:0004799, GO:0005739, GO:0005829, GO:0006231, GO:0006730, GO:0008152, GO:0008168, GO:0009165, GO:0016491, GO:0016740, GO:0032259, GO:0046654, GO:0055114
A01p03930.1_BnaDAR	A01	1822214	1822959	1	***	tRNA-methyltransferase non-catalytic subunit trm6MTase subunit	methyltransferase activity; membrane; integral component of membrane; transferase activity; methylation	GO:0008168, GO:0016020, GO:0016021, GO:0016740, GO:0032259
A01p03940.1_BnaDAR	A01	1825726	1827164	5	***	Isoflavone reductase family protein	response to hydroperoxide; positive regulation of leaf senescence	GO:0033194, GO:1900057
A01p03950.1_BnaDAR	A01	1828552	1830007	6	***	Transcription factor bHLH63	nucleus; regulation of transcription, DNA-templated; protein dimerization activity	GO:0005634, GO:0006355, GO:0046983
A01p03960.1_BnaDAR	A01	1834154	1837105	7	***	Kinase family protein	nucleotide binding; protein kinase activity; protein serine/threonine kinase activity; ATP binding; protein phosphorylation; membrane; integral component of membrane; kinase activity; phosphorylation; transferase activity	GO:0000166, GO:0004672, GO:0004674, GO:0005524, GO:0006468, GO:0016020, GO:0016021, GO:0016301, GO:0016310, GO:0016740
A01p03970.1_BnaDAR	A01	1837421	1840585	10	***	Adenylyl cyclase-associated protein	cell morphogenesis; actin binding; cytoskeleton organization	GO:0000902, GO:0003779, GO:0007010
A01p03980.1_BnaDAR	A01	1841554	1847728	12	***	BnaA03g52860D protein	hydrolase activity, hydrolyzing O-glycosyl compounds; carbohydrate metabolic process; metabolic process; hydrolase activity; hydrolase activity, acting on glycosyl bonds; glucan endo-1,3-beta-D-glucosidase activity; anchored component of plasma membrane	GO:0004553, GO:0005975, GO:0008152, GO:0016787, GO:0016798, GO:0042973, GO:0046658
A01p03990.1_BnaDAR	A01	1847959	1852843	17	***	Coatomer subunit gamma	Golgi membrane; structural molecule activity; cytoplasm; endoplasmic reticulum; endoplasmic reticulum-Golgi intermediate compartment; Golgi apparatus; cytosol; plasma membrane; intracellular protein transport; endoplasmic reticulum to Golgi vesicle-mediated transport; intra-Golgi vesicle-mediated transport; protein secretion; plasmodesma; chloroplast; protein transport; membrane; vesicle-mediated…	GO:0000139, GO:0005198, GO:0005737, GO:0005783, GO:0005793, GO:0005794, GO:0005829, GO:0005886, GO:0006886, GO:0006888, GO:0006891, GO:0009306, GO:0009506, GO:0009507, GO:0015031, GO:0016020, GO:0016192, GO:0030117, GO:0030126, GO:0030663, GO:0031410
A01p04000.1_BnaDAR	A01	1853335	1856133	8	***	Receptor-like kinase	nucleotide binding; protein kinase activity; protein serine/threonine kinase activity; ATP binding; protein phosphorylation; membrane; integral component of membrane; kinase activity; phosphorylation; transferase activity	GO:0000166, GO:0004672, GO:0004674, GO:0005524, GO:0006468, GO:0016020, GO:0016021, GO:0016301, GO:0016310, GO:0016740
A01p04010.1_BnaDAR	A01	1856815	1869239	13	***	SWI/SNF complex subunit SWI3D	DNA binding; protein binding; nucleus; chromatin organization; multicellular organism development; zinc ion binding; metal ion binding	GO:0003677, GO:0005515, GO:0005634, GO:0006325, GO:0007275, GO:0008270, GO:0046872
A01p04020.1_BnaDAR	A01	1871774	1872857	6	***	TP53RK-binding	nucleus	GO:0005634
A01p04030.1_BnaDAR	A01	1872858	1873961	1	***	Ethylene-responsive transcription factor ERF109	DNA binding; DNA-binding transcription factor activity; nucleus; regulation of transcription, DNA-templated; ethylene-activated signaling pathway; phloem or xylem histogenesis; response to chitin; regulation of auxin mediated signaling pathway; defense response to fungus; cell division; root regeneration; regulation of tryptophan metabolic process	GO:0003677, GO:0003700, GO:0005634, GO:0006355, GO:0009873, GO:0010087, GO:0010200, GO:0010928, GO:0050832, GO:0051301, GO:0062211, GO:0090357
A01p04040.1_BnaDAR	A01	1877634	1877870	1	*-*	Guanine nucleotide-binding protein alpha-1 subunit	GTPase activity; signal transduction; G protein-coupled receptor signaling pathway; guanyl nucleotide binding; G-protein beta/gamma-subunit complex binding	GO:0003924, GO:0007165, GO:0007186, GO:0019001, GO:0031683
A01p04050.1_BnaDAR	A01	1880878	1884133	6	***	Extra-large guanine nucleotide-binding protein 2	nucleotide binding; G protein-coupled receptor binding; GTPase activity; protein binding; GTP binding; nucleus; heterotrimeric G-protein complex; defense response; signal transduction; G protein-coupled receptor signaling pathway; adenylate cyclase-modulating G protein-coupled receptor signaling pathway; response to bacterium; guanyl nucleotide binding; G-protein beta/gamma-subunit complex bindin…	GO:0000166, GO:0001664, GO:0003924, GO:0005515, GO:0005525, GO:0005634, GO:0005834, GO:0006952, GO:0007165, GO:0007186, GO:0007188, GO:0009617, GO:0019001, GO:0031683, GO:0042742, GO:0046872
A01p04060.1_BnaDAR	A01	1885282	1886721	1	***	WD40 repeat-containing protein	protein phosphorylation; transferase activity; myosin heavy chain kinase activity	GO:0006468, GO:0016740, GO:0016905
A01p04070.1_BnaDAR	A01	1888058	1891164	6	***	RBR-type E3 ubiquitin transferase	ubiquitin ligase complex; protein polyubiquitination; ubiquitin-protein transferase activity; cytoplasm; ubiquitin-dependent protein catabolic process; protein ubiquitination; ubiquitin conjugating enzyme binding; positive regulation of proteasomal ubiquitin-dependent protein catabolic process; metal ion binding; ubiquitin protein ligase activity	GO:0000151, GO:0000209, GO:0004842, GO:0005737, GO:0006511, GO:0016567, GO:0031624, GO:0032436, GO:0046872, GO:0061630
A01p04080.1_BnaDAR	A01	1892103	1892735	2	--*	methyltransferase-like protein 13	methyltransferase activity; transferase activity; methylation	GO:0008168, GO:0016740, GO:0032259
A01p04090.1_BnaDAR	A01	1893766	1901602	9	***	4-hydroxy-3-methylbut-2-enyl diphosphate reductase	oxidoreductase activity; isopentenyl diphosphate biosynthetic process, methylerythritol 4-phosphate pathway; metal ion binding; dimethylallyl diphosphate biosynthetic process; iron-sulfur cluster binding; 4 iron, 4 sulfur cluster binding; 4-hydroxy-3-methylbut-2-en-1-yl diphosphate reductase activity; oxidation-reduction process	GO:0016491, GO:0019288, GO:0046872, GO:0050992, GO:0051536, GO:0051539, GO:0051745, GO:0055114
A01p04100.1_BnaDAR	A01	1902440	1903620	1	***	Transcription initiation factor TFIID subunit 8	protein binding; nucleus; transcription factor TFIID complex; protein heterodimerization activity	GO:0005515, GO:0005634, GO:0005669, GO:0046982
A01p04110.1_BnaDAR	A01	1903751	1915637	13	***	Alpha/beta-hydrolases superfamily protein	hydrolase activity	GO:0016787
A01p04120.1_BnaDAR	A01	1915887	1920129	10	***	Transducin/WD-like repeat-protein	cellular response to UV-B; Cul4-RING E3 ubiquitin ligase complex	GO:0071493, GO:0080008
A01p04130.1_BnaDAR	A01	1920298	1921623	4	***	Thioredoxin domain-containing protein 9 like	membrane; integral component of membrane	GO:0016020, GO:0016021
A01p04140.1_BnaDAR	A01	1922098	1924032	8	***	TIP41-like family protein	regulation of phosphoprotein phosphatase activity	GO:0043666
A01p04150.1_BnaDAR	A01	1925023	1925511	2	--*	protein NUCLEAR FUSION DEFECTIVE 6, chloroplastic/mitochondrial	mitochondrion	GO:0005739
A01p04160.1_BnaDAR	A01	1926290	1926774	2	***	SCRL24	extracellular region; signal transduction	GO:0005576, GO:0007165
A01p04170.1_BnaDAR	A01	1927842	1932038	9	***	Alpha-L-fucosidase	alpha-L-fucosidase activity; carbohydrate metabolic process	GO:0004560, GO:0005975
A01p04180.1_BnaDAR	A01	1934655	1936253	1	***	3-ketoacyl-CoA synthase	fatty acid biosynthetic process; membrane; integral component of membrane; transferase activity; transferase activity, transferring acyl groups; transferase activity, transferring acyl groups other than amino-acyl groups; 3-oxo-arachidoyl-CoA synthase activity; 3-oxo-cerotoyl-CoA synthase activity; 3-oxo-lignoceronyl-CoA synthase activity; very-long-chain 3-ketoacyl-CoA synthase activity	GO:0006633, GO:0016020, GO:0016021, GO:0016740, GO:0016746, GO:0016747, GO:0102336, GO:0102337, GO:0102338, GO:0102756
A01p04190.1_BnaDAR	A01	1939635	1942526	8	***	Aldehyde dehydrogenase	3-chloroallyl aldehyde dehydrogenase activity; cellular aldehyde metabolic process; oxidoreductase activity; oxidoreductase activity, acting on the aldehyde or oxo group of donors, NAD or NADP as acceptor; oxidation-reduction process	GO:0004028, GO:0006081, GO:0016491, GO:0016620, GO:0055114
A01p04200.1_BnaDAR	A01	1944822	1946672	5	***	Alcohol dehydrogenase, putative	zinc ion binding; lignin biosynthetic process; oxidoreductase activity; oxidoreductase activity, acting on the CH-OH group of donors, NAD or NADP as acceptor; cinnamyl-alcohol dehydrogenase activity; metal ion binding; sinapyl alcohol dehydrogenase activity; oxidation-reduction process	GO:0008270, GO:0009809, GO:0016491, GO:0016616, GO:0045551, GO:0046872, GO:0052747, GO:0055114
A01p04210.1_BnaDAR	A01	1948067	1951026	7	***	MADS-box transcription factor	RNA polymerase II transcription regulatory region sequence-specific DNA binding; DNA binding; DNA-binding transcription factor activity; nucleus; regulation of transcription, DNA-templated; positive regulation of transcription by RNA polymerase II; protein dimerization activity	GO:0000977, GO:0003677, GO:0003700, GO:0005634, GO:0006355, GO:0045944, GO:0046983
A01p04220.1_BnaDAR	A01	1953787	1956170	2	***	Receptor protein kinase-like protein	protein kinase activity; ATP binding; protein phosphorylation; membrane; integral component of membrane; kinase activity; phosphorylation	GO:0004672, GO:0005524, GO:0006468, GO:0016020, GO:0016021, GO:0016301, GO:0016310
A01p04230.1_BnaDAR	A01	1956970	1957834	2	***	Carbohydrate esterase	hydrolase activity	GO:0016787
A01p04240.1_BnaDAR	A01	1960434	1963298	4	***	D-3-phosphoglycerate dehydrogenase	phosphoglycerate dehydrogenase activity; cellular amino acid metabolic process; L-serine biosynthetic process; cellular amino acid biosynthetic process; chloroplast stroma; oxidoreductase activity; oxidoreductase activity, acting on the CH-OH group of donors, NAD or NADP as acceptor; NAD binding; oxidation-reduction process	GO:0004617, GO:0006520, GO:0006564, GO:0008652, GO:0009570, GO:0016491, GO:0016616, GO:0051287, GO:0055114
A01p04250.1_BnaDAR	A01	1963706	1964719	4	***	Stress enhanced protein 1, chloroplastic	chloroplast; photosystem II; chloroplast thylakoid membrane; plastid; thylakoid; response to wounding; response to high light intensity; photosynthesis; membrane; integral component of membrane; chlorophyll binding; cellular response to high light intensity; cellular response to UV-A	GO:0009507, GO:0009523, GO:0009535, GO:0009536, GO:0009579, GO:0009611, GO:0009644, GO:0015979, GO:0016020, GO:0016021, GO:0016168, GO:0071486, GO:0071492
A01p04260.1_BnaDAR	A01	1964798	1968780	12	***	V-type proton ATPase subunit H	vacuolar proton-transporting V-type ATPase, V1 domain; ion transport; proton-transporting ATPase activity, rotational mechanism; proton transmembrane transport	GO:0000221, GO:0006811, GO:0046961, GO:1902600
A01p04270.1_BnaDAR	A01	1969776	1971289	3	***	F-box/LRR protein	biological_process	GO:0008150
A01p04280.1_BnaDAR	A01	1979207	1980995	4	***	Cyclin-D3-1	regulation of cyclin-dependent protein serine/threonine kinase activity; G1/S transition of mitotic cell cycle; cyclin-dependent protein kinase holoenzyme complex; protein binding; nucleus; cytoplasm; cell cycle; response to cytokinin; response to sucrose; guard mother cell differentiation; cyclin-dependent protein serine/threonine kinase regulator activity; mitotic cell cycle phase transition; s…	GO:0000079, GO:0000082, GO:0000307, GO:0005515, GO:0005634, GO:0005737, GO:0007049, GO:0009735, GO:0009744, GO:0010444, GO:0016538, GO:0044772, GO:0048316, GO:0051301
A01p04290.1_BnaDAR	A01	1981679	1987080	16	***	D111/G-patch domain-containing protein	nucleic acid binding	GO:0003676
A01p04300.1_BnaDAR	A01	1987330	1988951	2	***	Glycosyltransferase	UDP-glycosyltransferase activity; transferase activity; transferase activity, transferring glycosyl groups	GO:0008194, GO:0016740, GO:0016757
A01p04310.1_BnaDAR	A01	1989758	1991390	1	***	Glycosyltransferase	UDP-glycosyltransferase activity; transferase activity; transferase activity, transferring glycosyl groups	GO:0008194, GO:0016740, GO:0016757
A01p04320.1_BnaDAR	A01	1994483	1996212	2	***	Glycosyltransferase	UDP-glycosyltransferase activity; transferase activity; transferase activity, transferring glycosyl groups	GO:0008194, GO:0016740, GO:0016757
A01p04330.1_BnaDAR	A01	1996431	1998098	8	***	CBS domain-containing protein CBSX1, chloroplastic	chloroplast; plastid; cell redox homeostasis	GO:0009507, GO:0009536, GO:0045454
A01p04340.1_BnaDAR	A01	1998822	2002201	14	***	Polyadenylate-binding protein	nucleic acid binding; RNA binding; cytoplasm	GO:0003676, GO:0003723, GO:0005737
A01p04350.1_BnaDAR	A01	2003746	2008148	9	***	E3 ubiquitin-protein ligase MARCH6	zinc ion binding; membrane; integral component of membrane	GO:0008270, GO:0016020, GO:0016021
A01p04360.1_BnaDAR	A01	2008598	2014794	22	***	Demeter-like protein 3	DNA binding; catalytic activity; nucleus; DNA repair; base-excision repair	GO:0003677, GO:0003824, GO:0005634, GO:0006281, GO:0006284
A01p04370.1_BnaDAR	A01	2015694	2018994	4	***	BnaA08g11660D protein	membrane; integral component of membrane	GO:0016020, GO:0016021
A01p04380.1_BnaDAR	A01	2019814	2022018	8	***	DJ-1 family protein	chloroplast; chloroplast organization	GO:0009507, GO:0009658
A01p04390.1_BnaDAR	A01	2022044	2024442	4	***	ABSCISIC ACID-INSENSITIVE 5-like protein	transcription regulatory region sequence-specific DNA binding; DNA-binding transcription factor activity; nucleus; regulation of transcription, DNA-templated; response to water deprivation; response to salt stress; response to abscisic acid; abscisic acid-activated signaling pathway; sequence-specific DNA binding; positive regulation of transcription, DNA-templated	GO:0000976, GO:0003700, GO:0005634, GO:0006355, GO:0009414, GO:0009651, GO:0009737, GO:0009738, GO:0043565, GO:0045893
A01p04400.1_BnaDAR	A01	2028874	2029815	3	*-*	Cold regulated protein 27	0
A01p04410.1_BnaDAR	A01	2031605	2033743	1	*-*	Leucine-rich repeat extensin-like protein 4	membrane; integral component of membrane	GO:0016020, GO:0016021
A01p04420.1_BnaDAR	A01	2038206	2039095	3	--*	5-methyltetrahydropteroyltriglutamate--homocysteine methyltransferase	5-methyltetrahydropteroyltriglutamate-homocysteine S-methyltransferase activity; methyltransferase activity; zinc ion binding; cellular amino acid biosynthetic process; methionine biosynthetic process; transferase activity; methylation; metal ion binding	GO:0003871, GO:0008168, GO:0008270, GO:0008652, GO:0009086, GO:0016740, GO:0032259, GO:0046872
A01p04430.1_BnaDAR	A01	2039488	2039685	1	***	At4g33960	biological_process	GO:0008150
A01p04440.1_BnaDAR	A01	2044259	2046963	11	***	Serine/threonine-protein kinase SRK2E	nucleotide binding; protein kinase activity; protein serine/threonine kinase activity; protein binding; ATP binding; nucleus; cytoplasm; cytosol; plasma membrane; sucrose metabolic process; protein phosphorylation; unsaturated fatty acid biosynthetic process; defense response; response to osmotic stress; response to water deprivation; response to salt stress; response to abscisic acid; abscisic a…	GO:0000166, GO:0004672, GO:0004674, GO:0005515, GO:0005524, GO:0005634, GO:0005737, GO:0005829, GO:0005886, GO:0005985, GO:0006468, GO:0006636, GO:0006952, GO:0006970, GO:0009414, GO:0009651, GO:0009737, GO:0009738, GO:0009789, GO:0009931, GO:0010118, GO:0010119, GO:0010359, GO:0016301, GO:0016310, GO:0016740, GO:0019432, GO:0019903, GO:0035556, GO:0042742, GO:0042802, GO:0046777, GO:0048366, GO:…
A01p04450.1_BnaDAR	A01	2047822	2050726	8	***	Armadillo repeat-containing protein, putative	membrane; integral component of membrane; metal ion binding	GO:0016020, GO:0016021, GO:0046872
A01p04460.1_BnaDAR	A01	2051301	2052439	5	***	E3 ubiquitin-protein ligase RNF170-like	membrane; integral component of membrane; metal ion binding	GO:0016020, GO:0016021, GO:0046872
A01p04470.1_BnaDAR	A01	2054775	2055314	2	***	Ribosomal protein S29	structural constituent of ribosome; ribosome; translation; zinc ion binding	GO:0003735, GO:0005840, GO:0006412, GO:0008270
A01p04480.1_BnaDAR	A01	2064774	2066563	5	***	Transcription factor bHLH85	nucleus; protein dimerization activity	GO:0005634, GO:0046983
A01p04490.1_BnaDAR	A01	2067214	2068051	1	--*	RNA methylase	RNA methylation; RNA binding; nucleolus; RNA processing; methyltransferase activity; S-adenosylmethionine-dependent methyltransferase activity; transferase activity; methylation; ribosome biogenesis	GO:0001510, GO:0003723, GO:0005730, GO:0006396, GO:0008168, GO:0008757, GO:0016740, GO:0032259, GO:0042254
A01p04500.1_BnaDAR	A01	2067973	2068445	3	--*	Hydrolase FUB4	hydrolase activity	GO:0016787
A01p04510.1_BnaDAR	A01	2071402	2072896	4	***	Peroxidase	peroxidase activity; extracellular region; response to oxidative stress; oxidoreductase activity; heme binding; hydrogen peroxide catabolic process; metal ion binding; oxidation-reduction process; cellular oxidant detoxification	GO:0004601, GO:0005576, GO:0006979, GO:0016491, GO:0020037, GO:0042744, GO:0046872, GO:0055114, GO:0098869
A01p04520.1_BnaDAR	A01	2075815	2076960	4	***	At4g33800	nucleus; cytoplasm; cytokinin metabolic process; cytokinin biosynthetic process; cytokinin-activated signaling pathway	GO:0005634, GO:0005737, GO:0009690, GO:0009691, GO:0009736
A01p04530.1_BnaDAR	A01	2079802	2087326	10	***	Fatty acyl-CoA reductase	lipid metabolic process; oxidoreductase activity; oxidation-reduction process; fatty-acyl-CoA reductase (alcohol-forming) activity; alcohol-forming fatty acyl-CoA reductase activity	GO:0006629, GO:0016491, GO:0055114, GO:0080019, GO:0102965
A01p04540.1_BnaDAR	A01	2088732	2089405	3	***	At4g33780-like protein	regulation of abscisic acid-activated signaling pathway; negative regulation of photomorphogenesis	GO:0009787, GO:0010100
A01p04550.1_BnaDAR	A01	2092539	2092739	1	--*	Ribbon-helix-helix protein, copG family	regulation of transcription, DNA-templated	GO:0006355
A01p04560.1_BnaDAR	A01	2093135	2094177	2	*-*	DNA helicase	nucleotide binding; DNA binding; DNA helicase activity; helicase activity; ATP binding; nucleus; DNA replication; DNA replication initiation; hydrolase activity; DNA duplex unwinding; MCM complex	GO:0000166, GO:0003677, GO:0003678, GO:0004386, GO:0005524, GO:0005634, GO:0006260, GO:0006270, GO:0016787, GO:0032508, GO:0042555
A01p04570.1_BnaDAR	A01	2096512	2099393	9	***	Inositol-tetrakisphosphate 1-kinase	nucleotide binding; magnesium ion binding; ATP binding; cytoplasm; kinase activity; phosphorylation; transferase activity; inositol trisphosphate metabolic process; metal ion binding; inositol tetrakisphosphate 1-kinase activity; inositol-1,3,4-trisphosphate 6-kinase activity; inositol-1,3,4-trisphosphate 5-kinase activity; inositol phosphorylation	GO:0000166, GO:0000287, GO:0005524, GO:0005737, GO:0016301, GO:0016310, GO:0016740, GO:0032957, GO:0046872, GO:0047325, GO:0052725, GO:0052726, GO:0052746
A01p04580.1_BnaDAR	A01	2099828	2103415	14	***	Aspartate--tRNA(Asp/Asn) ligase	nucleotide binding; nucleic acid binding; DNA binding; aminoacyl-tRNA ligase activity; ATP binding; cytoplasm; translation; tRNA aminoacylation for protein translation; ligase activity	GO:0000166, GO:0003676, GO:0003677, GO:0004812, GO:0005524, GO:0005737, GO:0006412, GO:0006418, GO:0016874
A01p04590.1_BnaDAR	A01	2105167	2106690	1	***	Myb-like protein X	endosome; Golgi apparatus; Golgi medial cisterna; trans-Golgi network; biological_process; membrane; integral component of membrane	GO:0005768, GO:0005794, GO:0005797, GO:0005802, GO:0008150, GO:0016020, GO:0016021
A01p04600.1_BnaDAR	A01	2108205	2108844	1	***	Pathogenesis-related protein 1	molecular_function; extracellular region; extracellular space; cell wall; defense response; response to water deprivation; response to biotic stimulus; systemic acquired resistance; response to vitamin B1; apoplast; secretory vesicle	GO:0003674, GO:0005576, GO:0005615, GO:0005618, GO:0006952, GO:0009414, GO:0009607, GO:0009627, GO:0010266, GO:0048046, GO:0099503
A01p04610.1_BnaDAR	A01	2110548	2111304	1	***	Pathogenesis-related protein 1	extracellular region; defense response	GO:0005576, GO:0006952
A01p04620.1_BnaDAR	A01	2114850	2117762	11	***	DUF21 domain-containing protein	membrane; integral component of membrane	GO:0016020, GO:0016021
A01p04630.1_BnaDAR	A01	2117808	2119245	4	***	At4g33690	protein binding; biological_process	GO:0005515, GO:0008150
A01p04640.1_BnaDAR	A01	2119449	2122559	10	***	LL-diaminopimelate aminotransferase	catalytic activity; transaminase activity; biosynthetic process; transferase activity; pyridoxal phosphate binding	GO:0003824, GO:0008483, GO:0009058, GO:0016740, GO:0030170
A01p04650.1_BnaDAR	A01	2122603	2122998	2	--*	NEDD8-activating enzyme E1 regulatory subunit	ubiquitin-like modifier activating enzyme activity; NEDD8 activating enzyme activity; protein neddylation	GO:0008641, GO:0019781, GO:0045116
A01p04660.1_BnaDAR	A01	2123921	2124376	2	-**	Cysteine-rich/transmembrane domain A-like protein	protein binding; plasma membrane; biological_process; membrane; integral component of membrane	GO:0005515, GO:0005886, GO:0008150, GO:0016020, GO:0016021
A01p04670.1_BnaDAR	A01	2125062	2130527	21	***	Dynamin related protein	nucleotide binding; GTPase activity; GTP binding; hydrolase activity	GO:0000166, GO:0003924, GO:0005525, GO:0016787
A01p04680.1_BnaDAR	A01	2131572	2132301	2	***	Costars family protein abracl protein	regulation of actin filament-based process	GO:0032970
A01p04690.1_BnaDAR	A01	2132827	2134164	6	***	Golgi apparatus membrane protein TVP15	membrane; integral component of membrane	GO:0016020, GO:0016021
A01p04700.1_BnaDAR	A01	2134282	2139732	17	***	Cysteine proteinase superfamily protein	proteolysis; cysteine-type peptidase activity	GO:0006508, GO:0008234
A01p04710.1_BnaDAR	A01	2140609	2143162	10	***	Carbonic anhydrase	carbonate dehydratase activity; zinc ion binding; carbon utilization; lyase activity	GO:0004089, GO:0008270, GO:0015976, GO:0016829
A01p04720.1_BnaDAR	A01	2143204	2146081	11	***	Metallo-beta-lactamase family protein	protein domain specific binding; response to arsenic-containing substance	GO:0019904, GO:0046685
A01p04730.1_BnaDAR	A01	2147064	2150562	10	***	Potassium transporter	plant-type vacuole; vacuolar membrane; plasma membrane; ion transport; potassium ion transport; potassium ion transmembrane transporter activity; membrane; integral component of membrane; potassium ion transmembrane transport	GO:0000325, GO:0005774, GO:0005886, GO:0006811, GO:0006813, GO:0015079, GO:0016020, GO:0016021, GO:0071805
A01p04740.1_BnaDAR	A01	2151149	2156004	17	***	Copper-transporting ATPase PAA1, chloroplastic	nucleotide binding; copper ion transmembrane transporter activity; protein binding; ATP binding; plasma membrane; ion transport; cation transport; copper ion transport; chloroplast; plastid; chloroplast stroma; photosynthetic electron transport chain; chloroplast envelope; membrane; integral component of membrane; copper chaperone activity; ATPase-coupled cation transmembrane transporter activity…	GO:0000166, GO:0005375, GO:0005515, GO:0005524, GO:0005886, GO:0006811, GO:0006812, GO:0006825, GO:0009507, GO:0009536, GO:0009570, GO:0009767, GO:0009941, GO:0016020, GO:0016021, GO:0016531, GO:0019829, GO:0030001, GO:0031969, GO:0035434, GO:0043682, GO:0046872, GO:0055070, GO:0072511
A01p04750.1_BnaDAR	A01	2156702	2159957	5	***	Phospho-2-dehydro-3-deoxyheptonate aldolase	catalytic activity; 3-deoxy-7-phosphoheptulonate synthase activity; cellular amino acid biosynthetic process; aromatic amino acid family biosynthetic process; chorismate biosynthetic process; chloroplast; plastid; transferase activity	GO:0003824, GO:0003849, GO:0008652, GO:0009073, GO:0009423, GO:0009507, GO:0009536, GO:0016740
A01p04760.1_BnaDAR	A01	2163548	2168376	9	*-*	Protein phosphatase 2c, putative	dephosphorylation; phosphatase activity	GO:0016311, GO:0016791
A01p04770.1_BnaDAR	A01	2169341	2170874	1	***	Protein ROOT PRIMORDIUM DEFECTIVE 1	negative regulation of cell population proliferation; lateral root morphogenesis	GO:0008285, GO:0010102
A01p04780.1_BnaDAR	A01	2170948	2172846	6	***	Aspartic proteinase Asp1	aspartic-type endopeptidase activity; proteolysis; peptidase activity; hydrolase activity	GO:0004190, GO:0006508, GO:0008233, GO:0016787
A01p04790.1_BnaDAR	A01	2173431	2176211	10	*-*	Histone deacetylase	histone deacetylase activity; chromatin organization; histone deacetylation; NAD-dependent histone deacetylase activity (H3-K14 specific)""; histone H3 deacetylation	GO:0004407, GO:0006325, GO:0016575, GO:0032041, GO:0070932
A01p04800.1_BnaDAR	A01	2176457	2179074	9	***	Histone deacetylase	histone deacetylase activity; chromatin organization; histone deacetylation; NAD-dependent histone deacetylase activity (H3-K14 specific)""; histone H3 deacetylation	GO:0004407, GO:0006325, GO:0016575, GO:0032041, GO:0070932
A01p04810.1_BnaDAR	A01	2179581	2179959	2	--*	Threonine--tRNA ligase	tRNA binding; nucleotide binding; RNA binding; aminoacyl-tRNA ligase activity; threonine-tRNA ligase activity; ATP binding; cytoplasm; translation; tRNA aminoacylation for protein translation; threonyl-tRNA aminoacylation; ligase activity; tRNA aminoacylation; metal ion binding	GO:0000049, GO:0000166, GO:0003723, GO:0004812, GO:0004829, GO:0005524, GO:0005737, GO:0006412, GO:0006418, GO:0006435, GO:0016874, GO:0043039, GO:0046872
A01p04820.1_BnaDAR	A01	2180435	2182179	5	***	ATP-binding ABC transporter	nucleotide binding; ATP binding; chloroplast envelope; hydrolase activity; ATPase activity	GO:0000166, GO:0005524, GO:0009941, GO:0016787, GO:0016887
A01p04830.1_BnaDAR	A01	2182960	2184114	2	***	MYB transcription factor	RNA polymerase II cis-regulatory region sequence-specific DNA binding; DNA-binding transcription factor activity, RNA polymerase II-specific; DNA-binding transcription factor activity; protein binding; nucleus; regulation of transcription, DNA-templated; regulation of transcription by RNA polymerase II; positive regulation of transcription, DNA-templated; regulation of secondary cell wall biogene…	GO:0000978, GO:0000981, GO:0003700, GO:0005515, GO:0005634, GO:0006355, GO:0006357, GO:0045893, GO:2000652
A01p04840.1_BnaDAR	A01	2187420	2188826	1	*-*	Protein CROWDED NUCLEI 1	cytoplasmic chromatin; protein binding; nucleus; nuclear envelope; nuclear lamina; nucleoplasm; mitochondrion; cytosol; nucleus organization; membrane; nuclear membrane; nuclear periphery; regulation of nucleus size	GO:0000789, GO:0005515, GO:0005634, GO:0005635, GO:0005652, GO:0005654, GO:0005739, GO:0005829, GO:0006997, GO:0016020, GO:0031965, GO:0034399, GO:0097298
A01p04850.1_BnaDAR	A01	2189855	2192990	5	***	Pectin lyase-like superfamily protein	polygalacturonase activity; cell wall; carbohydrate metabolic process; metabolic process; membrane; integral component of membrane; hydrolase activity; hydrolase activity, acting on glycosyl bonds; lyase activity	GO:0004650, GO:0005618, GO:0005975, GO:0008152, GO:0016020, GO:0016021, GO:0016787, GO:0016798, GO:0016829
A01p04860.1_BnaDAR	A01	2194363	2197850	11	***	Receptor-like kinase	nucleotide binding; protein kinase activity; protein serine/threonine kinase activity; transmembrane receptor protein serine/threonine kinase activity; signaling receptor binding; ATP binding; plasma membrane; protein phosphorylation; transmembrane receptor protein serine/threonine kinase signaling pathway; membrane; integral component of membrane; kinase activity; phosphorylation; transferase ac…	GO:0000166, GO:0004672, GO:0004674, GO:0004675, GO:0005102, GO:0005524, GO:0005886, GO:0006468, GO:0007178, GO:0016020, GO:0016021, GO:0016301, GO:0016310, GO:0016740, GO:0106310, GO:0106311
A01p04870.1_BnaDAR	A01	2198110	2199783	4	***	Peroxidase	peroxidase activity; extracellular region; response to oxidative stress; membrane; integral component of membrane; oxidoreductase activity; heme binding; hydrogen peroxide catabolic process; metal ion binding; oxidation-reduction process; cellular oxidant detoxification	GO:0004601, GO:0005576, GO:0006979, GO:0016020, GO:0016021, GO:0016491, GO:0020037, GO:0042744, GO:0046872, GO:0055114, GO:0098869
A01p04880.1_BnaDAR	A01	2201238	2203909	4	***	Signal peptide peptidase-like 3	aspartic-type endopeptidase activity; proteolysis; membrane; integral component of membrane	GO:0004190, GO:0006508, GO:0016020, GO:0016021
A01p04890.1_BnaDAR	A01	2204671	2207015	2	***	Vacuolar import/degradation, Vid27-related protein	nucleus; cytosol; plasma membrane	GO:0005634, GO:0005829, GO:0005886
A01p04900.1_BnaDAR	A01	2207226	2212634	11	***	Protein WEAK CHLOROPLAST MOVEMENT UNDER BLUE LIGHT-like 1	molecular_function; cytosol; chloroplast avoidance movement; chloroplast accumulation movement	GO:0003674, GO:0005829, GO:0009903, GO:0009904
A01p04910.1_BnaDAR	A01	2213570	2215627	8	***	Protein TIC 22, chloroplastic	plasma membrane; chloroplast; plastid; chloroplast envelope; protein transport; membrane; chloroplast intermembrane space	GO:0005886, GO:0009507, GO:0009536, GO:0009941, GO:0015031, GO:0016020, GO:0031972
A01p04920.1_BnaDAR	A01	2217264	2220716	4	***	Hexosyltransferase	Golgi apparatus; plant-type secondary cell wall biogenesis; glucuronosyltransferase activity; transferase activity; transferase activity, transferring glycosyl groups; xylan biosynthetic process	GO:0005794, GO:0009834, GO:0015020, GO:0016740, GO:0016757, GO:0045492
A01p04930.1_BnaDAR	A01	2222026	2225812	5	***	Disease resistance protein	ADP binding	GO:0043531
A01p04940.1_BnaDAR	A01	2226708	2231307	12	***	Cell division cycle 20.1, cofactor of APC complex	protein binding; nucleus; anaphase-promoting complex; cell cycle; anaphase-promoting complex binding; protein ubiquitination; kinase binding; anaphase-promoting complex-dependent catabolic process; mitotic checkpoint complex; cell division; ubiquitin-protein transferase activator activity; positive regulation of ubiquitin protein ligase activity; positive regulation of anaphase-promoting complex-…	GO:0005515, GO:0005634, GO:0005680, GO:0007049, GO:0010997, GO:0016567, GO:0019900, GO:0031145, GO:0033597, GO:0051301, GO:0097027, GO:1904668, GO:1905786, GO:1990757
A01p04950.1_BnaDAR	A01	2232787	2239635	10	***	1-phosphatidylinositol-3-phosphate 5-kinase FAB1A	nucleotide binding; 1-phosphatidylinositol-3-phosphate 5-kinase activity; ATP binding; endosome; vacuole organization; pollen development; endosome membrane; endomembrane system organization; membrane; kinase activity; phosphatidylinositol phosphate kinase activity; phosphorylation; transferase activity; phosphatidylinositol metabolic process; phosphatidylinositol phosphorylation; metal ion bindi…	GO:0000166, GO:0000285, GO:0005524, GO:0005768, GO:0007033, GO:0009555, GO:0010008, GO:0010256, GO:0016020, GO:0016301, GO:0016307, GO:0016310, GO:0016740, GO:0046488, GO:0046854, GO:0046872
A01p04960.1_BnaDAR	A01	2239680	2243142	5	***	Pectinesterase	enzyme inhibitor activity; hydrolase activity; pectinesterase activity; cell wall modification; negative regulation of catalytic activity; aspartyl esterase activity; pectin catabolic process; pectinesterase inhibitor activity	GO:0004857, GO:0016787, GO:0030599, GO:0042545, GO:0043086, GO:0045330, GO:0045490, GO:0046910
A01p04970.1_BnaDAR	A01	2244935	2250291	17	***	F-box/LRR-repeat protein 15	ubiquitin-dependent protein catabolic process; auxin homeostasis; SCF ubiquitin ligase complex; SCF-dependent proteasomal ubiquitin-dependent protein catabolic process; plant organ formation	GO:0006511, GO:0010252, GO:0019005, GO:0031146, GO:1905393
A01p04980.1_BnaDAR	A01	2250968	2263583	38	***	Myosin	nucleotide binding; motor activity; actin binding; calmodulin binding; ATP binding; actin filament organization; myosin complex; actin filament binding	GO:0000166, GO:0003774, GO:0003779, GO:0005516, GO:0005524, GO:0007015, GO:0016459, GO:0051015
A01p04990.1_BnaDAR	A01	2264039	2266075	5	***	Alpha/beta-Hydrolases superfamily protein	catalytic activity; hydrolase activity	GO:0003824, GO:0016787
A01p05000.1_BnaDAR	A01	2266379	2269446	1	***	Pentatricopeptide repeat-containing protein	zinc ion binding	GO:0008270
A01p05010.1_BnaDAR	A01	2269453	2270973	1	***	F-box family protein	leaf vascular tissue pattern formation; regulation of auxin mediated signaling pathway; simple leaf morphogenesis	GO:0010305, GO:0010928, GO:0060776
A01p05020.1_BnaDAR	A01	2275035	2280893	24	***	Alpha-aminoadipic semialdehyde synthase	catalytic activity; saccharopine dehydrogenase activity; cytoplasm; metabolic process; oxidoreductase activity; lysine biosynthetic process via aminoadipic acid; L-lysine catabolic process to acetyl-CoA via saccharopine; saccharopine dehydrogenase (NADP+, L-lysine-forming) activity; saccharopine dehydrogenase (NAD+, L-glutamate-forming) activity; oxidation-reduction process	GO:0003824, GO:0004753, GO:0005737, GO:0008152, GO:0016491, GO:0019878, GO:0033512, GO:0047130, GO:0047131, GO:0055114
A01p05030.1_BnaDAR	A01	2281140	2281328	1	--*	Glycine-rich protein	molecular_function; cellular_component; biological_process	GO:0003674, GO:0005575, GO:0008150
A01p05040.1_BnaDAR	A01	2282606	2282791	1	--*	Glycine-rich protein	molecular_function; cellular_component; biological_process	GO:0003674, GO:0005575, GO:0008150
A01p05050.1_BnaDAR	A01	2283916	2284101	1	--*	Succinyl-diaminopimelate desuccinylase	zinc ion binding; cellular amino acid biosynthetic process; succinyl-diaminopimelate desuccinylase activity; lysine biosynthetic process; lysine biosynthetic process via diaminopimelate; hydrolase activity; diaminopimelate biosynthetic process; metal ion binding; cobalt ion binding	GO:0008270, GO:0008652, GO:0009014, GO:0009085, GO:0009089, GO:0016787, GO:0019877, GO:0046872, GO:0050897
A01p05060.1_BnaDAR	A01	2286982	2287167	1	--*	Glycine-rich protein	molecular_function; cellular_component; biological_process	GO:0003674, GO:0005575, GO:0008150
A01p05070.1_BnaDAR	A01	2287713	2289734	6	*-*	Nucleotidase	5'-nucleotidase activity; deoxyribonucleotide catabolic process; dephosphorylation	GO:0008253, GO:0009264, GO:0016311
A01p05080.1_BnaDAR	A01	2290764	2292406	6	***	Rho GTPase-activating protein	biological_process	GO:0008150
A01p05090.1_BnaDAR	A01	2293544	2301173	16	***	Kinesin-like protein	nucleotide binding; motor activity; microtubule motor activity; ATP binding; nucleus; microtubule; microtubule-based movement; mitotic spindle organization; multicellular organism development; microtubule binding	GO:0000166, GO:0003774, GO:0003777, GO:0005524, GO:0005634, GO:0005874, GO:0007018, GO:0007052, GO:0007275, GO:0008017
A01p05100.1_BnaDAR	A01	2301088	2302132	3	***	TP53-regulated inhibitor of apoptosis 1	cytoplasm; mitochondrion; mitochondrial intermembrane space; lipid transport; apoptotic process; multicellular organism development; phospholipid transport; perinuclear region of cytoplasm; pronephros development; negative regulation of intrinsic apoptotic signaling pathway in response to DNA damage by p53 class mediator	GO:0005737, GO:0005739, GO:0005758, GO:0006869, GO:0006915, GO:0007275, GO:0015914, GO:0048471, GO:0048793, GO:1902166
A01p05110.1_BnaDAR	A01	2302470	2306938	18	***	Aminopeptidase	aminopeptidase activity; cytoplasm; proteolysis; peptidase activity; metallopeptidase activity; zinc ion binding; hydrolase activity; organelle membrane; peptide binding; peptide catabolic process; intracellular membrane-bounded organelle; metal ion binding; metalloaminopeptidase activity	GO:0004177, GO:0005737, GO:0006508, GO:0008233, GO:0008237, GO:0008270, GO:0016787, GO:0031090, GO:0042277, GO:0043171, GO:0043231, GO:0046872, GO:0070006
A01p05120.1_BnaDAR	A01	2307170	2311722	13	***	Serine/threonine-protein kinase, putative	nucleotide binding; protein kinase activity; protein serine/threonine kinase activity; protein kinase C activity; calcium-dependent protein kinase C activity; ATP binding; protein phosphorylation; kinase activity; phosphorylation; transferase activity; peptidyl-serine phosphorylation; intracellular signal transduction	GO:0000166, GO:0004672, GO:0004674, GO:0004697, GO:0004698, GO:0005524, GO:0006468, GO:0016301, GO:0016310, GO:0016740, GO:0018105, GO:0035556
A01p05130.1_BnaDAR	A01	2313396	2316905	10	***	Peptidyl-prolyl cis-trans isomerase	protein peptidyl-prolyl isomerization; peptidyl-prolyl cis-trans isomerase activity; protein folding; isomerase activity	GO:0000413, GO:0003755, GO:0006457, GO:0016853
A01p05140.1_BnaDAR	A01	2317545	2320082	9	***	IQ domain-containing protein IQM1	calmodulin binding; nucleus; cytoplasm; regulation of stomatal movement	GO:0005516, GO:0005634, GO:0005737, GO:0010119
A01p05150.1_BnaDAR	A01	2324109	2324969	1	***	Glutaredoxin-C6	protein binding; cytoplasm; electron transfer activity; protein disulfide oxidoreductase activity; electron transport chain; oxidation-reduction process	GO:0005515, GO:0005737, GO:0009055, GO:0015035, GO:0022900, GO:0055114
A01p05160.1_BnaDAR	A01	2327860	2330394	4	***	Udp-sulfoquinovose synthase	catalytic activity; sulfotransferase activity; zinc ion binding; glycolipid biosynthetic process; chloroplast; cellular response to phosphate starvation	GO:0003824, GO:0008146, GO:0008270, GO:0009247, GO:0009507, GO:0016036
A01p05170.1_BnaDAR	A01	2331195	2333573	4	***	Zinc transporter 9	zinc ion transmembrane transporter activity; ion transport; membrane; integral component of membrane; metal ion transport; metal ion transmembrane transporter activity; transmembrane transport; zinc ion transmembrane transport	GO:0005385, GO:0006811, GO:0016020, GO:0016021, GO:0030001, GO:0046873, GO:0055085, GO:0071577
A01p05180.1_BnaDAR	A01	2335336	2339957	14	***	Glycine dehydrogenase (decarboxylating)	catalytic activity; glycine dehydrogenase (decarboxylating) activity; glycine metabolic process; glycine catabolic process; oxidoreductase activity; glycine decarboxylation via glycine cleavage system; oxidation-reduction process	GO:0003824, GO:0004375, GO:0006544, GO:0006546, GO:0016491, GO:0019464, GO:0055114
A01p05190.1_BnaDAR	A01	2341620	2343555	9	***	Calcineurin B, putative	calcium ion binding; membrane; integral component of membrane	GO:0005509, GO:0016020, GO:0016021
A01p05200.1_BnaDAR	A01	2347167	2348854	4	*-*	BEL1-like homeodomain protein 1	nuclear chromatin; RNA polymerase II cis-regulatory region sequence-specific DNA binding; DNA-binding transcription factor activity, RNA polymerase II-specific; DNA binding; nucleus; regulation of transcription, DNA-templated; regulation of transcription by RNA polymerase II	GO:0000790, GO:0000978, GO:0000981, GO:0003677, GO:0005634, GO:0006355, GO:0006357
A01p05210.1_BnaDAR	A01	2349324	2349783	3	--*	UPF0283 membrane protein YE2117	plasma membrane; membrane; integral component of membrane	GO:0005886, GO:0016020, GO:0016021
A01p05220.1_BnaDAR	A01	2351358	2355167	4	***	BnaC01g40710D protein	membrane; integral component of membrane	GO:0016020, GO:0016021
A01p05230.1_BnaDAR	A01	2356877	2357272	2	--*	Isoleucine--tRNA ligase	tRNA binding; nucleotide binding; aminoacyl-tRNA editing activity; aminoacyl-tRNA ligase activity; isoleucine-tRNA ligase activity; ATP binding; cytoplasm; translation; tRNA aminoacylation for protein translation; isoleucyl-tRNA aminoacylation; zinc ion binding; ligase activity; metal ion binding; aminoacyl-tRNA metabolism involved in translational fidelity	GO:0000049, GO:0000166, GO:0002161, GO:0004812, GO:0004822, GO:0005524, GO:0005737, GO:0006412, GO:0006418, GO:0006428, GO:0008270, GO:0016874, GO:0046872, GO:0106074
A01p05240.1_BnaDAR	A01	2358271	2359287	5	*-*	BEL1-like homeodomain protein	nuclear chromatin; RNA polymerase II cis-regulatory region sequence-specific DNA binding; DNA-binding transcription factor activity, RNA polymerase II-specific; DNA binding; nucleus; regulation of transcription, DNA-templated; regulation of transcription by RNA polymerase II	GO:0000790, GO:0000978, GO:0000981, GO:0003677, GO:0005634, GO:0006355, GO:0006357
A01p05250.1_BnaDAR	A01	2359756	2360215	3	--*	UPF0283 membrane protein YE2117	plasma membrane; membrane; integral component of membrane	GO:0005886, GO:0016020, GO:0016021
A01p05260.1_BnaDAR	A01	2360924	2361361	3	*-*	homeobox protein BEL1 homolog	nuclear chromatin; RNA polymerase II cis-regulatory region sequence-specific DNA binding; DNA-binding transcription factor activity, RNA polymerase II-specific; DNA binding; nucleus; regulation of transcription, DNA-templated; regulation of transcription by RNA polymerase II	GO:0000790, GO:0000978, GO:0000981, GO:0003677, GO:0005634, GO:0006355, GO:0006357
A01p05270.1_BnaDAR	A01	2362024	2362755	5	--*	GTP 3',8-cyclase	nucleotide binding; catalytic activity; GTP binding; Mo-molybdopterin cofactor biosynthetic process; lyase activity; molybdopterin synthase complex; metal ion binding; iron-sulfur cluster binding; 4 iron, 4 sulfur cluster binding; GTP 3',8'-cyclase activity; S-adenosyl-L-methionine binding	GO:0000166, GO:0003824, GO:0005525, GO:0006777, GO:0016829, GO:0019008, GO:0046872, GO:0051536, GO:0051539, GO:0061798, GO:1904047
A01p05280.1_BnaDAR	A01	2363530	2364012	3	--*	Malate dehydrogenase 1, mitochondrial	catalytic activity; copper ion binding; cell wall; nucleus; cytoplasm; mitochondrion; mitochondrial matrix; carbohydrate metabolic process; tricarboxylic acid cycle; malate metabolic process; response to cold; chloroplast; oxidoreductase activity; malate dehydrogenase activity; oxidoreductase activity, acting on the CH-OH group of donors, NAD or NADP as acceptor; carboxylic acid metabolic process…	GO:0003824, GO:0005507, GO:0005618, GO:0005634, GO:0005737, GO:0005739, GO:0005759, GO:0005975, GO:0006099, GO:0006108, GO:0009409, GO:0009507, GO:0016491, GO:0016615, GO:0016616, GO:0019752, GO:0030060, GO:0042742, GO:0046686, GO:0055114
A01p05290.1_BnaDAR	A01	2364088	2364420	1	***	BnaAnng04060D protein	membrane; integral component of membrane	GO:0016020, GO:0016021
A01p05300.1_BnaDAR	A01	2364978	2365428	2	--*	NADH-quinone oxidoreductase subunit D	plasma membrane; membrane; oxidoreductase activity, acting on NAD(P)H; quinone binding; NADH dehydrogenase (quinone) activity; NAD binding; oxidation-reduction process	GO:0005886, GO:0016020, GO:0016651, GO:0048038, GO:0050136, GO:0051287, GO:0055114
A01p05310.1_BnaDAR	A01	2366794	2367372	2	--*	Tryptophan synthase beta chain	tryptophan biosynthetic process; tryptophan synthase activity; tryptophan metabolic process; cellular amino acid biosynthetic process; aromatic amino acid family biosynthetic process; lyase activity	GO:0000162, GO:0004834, GO:0006568, GO:0008652, GO:0009073, GO:0016829
A01p05320.1_BnaDAR	A01	2369756	2370450	2	--*	Methionine import ATP-binding protein MetN	nucleotide binding; amino acid transmembrane transport; ATP binding; plasma membrane; amino acid transport; ATPase-coupled amino acid transmembrane transporter activity; methionine transport; membrane; ATPase activity; ATPase-coupled transmembrane transporter activity; transmembrane transport	GO:0000166, GO:0003333, GO:0005524, GO:0005886, GO:0006865, GO:0015424, GO:0015821, GO:0016020, GO:0016887, GO:0042626, GO:0055085
A01p05330.1_BnaDAR	A01	2373668	2374321	3	--*	ATP-dependent Clp protease ATP-binding subunit ClpX	ATP binding; protein folding; proteolysis; peptidase activity; ATPase activity; unfolded protein binding	GO:0005524, GO:0006457, GO:0006508, GO:0008233, GO:0016887, GO:0051082
A01p05340.1_BnaDAR	A01	2378520	2381168	9	***	Vacuolar-processing enzyme, putative	cysteine-type endopeptidase activity; vacuole; proteolysis; vacuolar protein processing; peptidase activity; hydrolase activity; proteolysis involved in cellular protein catabolic process	GO:0004197, GO:0005773, GO:0006508, GO:0006624, GO:0008233, GO:0016787, GO:0051603
A01p05350.1_BnaDAR	A01	2387533	2389171	4	***	Chromosome 1 open reading frame 123	endoplasmic reticulum; endoplasmic reticulum membrane; lipid metabolic process; fatty acid metabolic process; fatty acid biosynthetic process; unsaturated fatty acid biosynthetic process; zinc ion binding; membrane; integral component of membrane; oxidoreductase activity; oxidation-reduction process	GO:0005783, GO:0005789, GO:0006629, GO:0006631, GO:0006633, GO:0006636, GO:0008270, GO:0016020, GO:0016021, GO:0016491, GO:0055114
A01p05360.1_BnaDAR	A01	2391291	2398744	21	***	Glycine-rich protein	vacuole; membrane; integral component of membrane	GO:0005773, GO:0016020, GO:0016021
A01p05370.1_BnaDAR	A01	2399112	2403005	18	***	Nuclear pore complex protein NUP85	protein binding; nucleus; nuclear envelope; nuclear pore; mRNA export from nucleus; protein import into nucleus; response to abscisic acid; protein transport; structural constituent of nuclear pore; nuclear pore outer ring; positive regulation of transcription, DNA-templated; mRNA transport	GO:0005515, GO:0005634, GO:0005635, GO:0005643, GO:0006406, GO:0006606, GO:0009737, GO:0015031, GO:0017056, GO:0031080, GO:0045893, GO:0051028
A01p05380.1_BnaDAR	A01	2403431	2405325	8	***	Peptidyl-tRNA hydrolase 2, mitochondrial	aminoacyl-tRNA hydrolase activity; hydrolase activity	GO:0004045, GO:0016787
A01p05390.1_BnaDAR	A01	2407825	2409014	2	***	GATA transcription factor	DNA binding; nucleus; regulation of transcription, DNA-templated; zinc ion binding; cell differentiation; sequence-specific DNA binding; positive regulation of transcription, DNA-templated; metal ion binding	GO:0003677, GO:0005634, GO:0006355, GO:0008270, GO:0030154, GO:0043565, GO:0045893, GO:0046872
A01p05400.1_BnaDAR	A01	2416131	2421390	17	***	Homeobox-leucine zipper protein like	DNA binding; nucleus; lipid binding	GO:0003677, GO:0005634, GO:0008289
A01p05410.1_BnaDAR	A01	2423910	2424401	1	***	Lachrymatory-factor synthase	protein phosphatase inhibitor activity; cytoplasm; plasma membrane; abscisic acid-activated signaling pathway; membrane; negative regulation of phosphoprotein phosphatase activity	GO:0004864, GO:0005737, GO:0005886, GO:0009738, GO:0016020, GO:0032515
A01p05420.1_BnaDAR	A01	2428018	2428898	1	***	At4g32860	biological_process	GO:0008150
A01p05430.1_BnaDAR	A01	2429678	2429993	2	--*	Thioredoxin-related transmembrane protein 1	protein binding; endoplasmic reticulum; endoplasmic reticulum membrane; disulfide oxidoreductase activity; membrane; integral component of membrane; response to endoplasmic reticulum stress; oxidation-reduction process	GO:0005515, GO:0005783, GO:0005789, GO:0015036, GO:0016020, GO:0016021, GO:0034976, GO:0055114
A01p05440.1_BnaDAR	A01	2430613	2434856	12	***	Poly(A) polymerase	nucleotide binding; RNA binding; polynucleotide adenylyltransferase activity; ATP binding; nucleus; mRNA processing; transferase activity; nucleotidyltransferase activity; RNA 3'-end processing; RNA polyadenylation; metal ion binding	GO:0000166, GO:0003723, GO:0004652, GO:0005524, GO:0005634, GO:0006397, GO:0016740, GO:0016779, GO:0031123, GO:0043631, GO:0046872
A01p05450.1_BnaDAR	A01	2441275	2444277	12	***	ATP-dependent 6-phosphofructokinase	nucleotide binding; catalytic activity; 6-phosphofructokinase activity; ATP binding; cytoplasm; fructose 6-phosphate metabolic process; glycolytic process; metabolic process; kinase activity; phosphorylation; transferase activity; metal ion binding; glycolytic process through fructose-6-phosphate	GO:0000166, GO:0003824, GO:0003872, GO:0005524, GO:0005737, GO:0006002, GO:0006096, GO:0008152, GO:0016301, GO:0016310, GO:0016740, GO:0046872, GO:0061615
A01p05460.1_BnaDAR	A01	2444665	2446678	9	***	Aurora kinase	nucleotide binding; protein kinase activity; protein serine/threonine kinase activity; ATP binding; protein phosphorylation; kinase activity; phosphorylation; transferase activity; NA; NA	GO:0000166, GO:0004672, GO:0004674, GO:0005524, GO:0006468, GO:0016301, GO:0016310, GO:0016740, GO:0106310, GO:0106311
A01p05470.1_BnaDAR	A01	2447546	2457132	19	***	Calcineurin-binding protein cabin-1	nucleus; DNA replication-independent nucleosome assembly	GO:0005634, GO:0006336
A01p05480.1_BnaDAR	A01	2457159	2460919	6	***	Carotenoid cleavage dioxygenase 8	oxidoreductase activity, acting on single donors with incorporation of molecular oxygen, incorporation of two atoms of oxygen; metal ion binding; dioxygenase activity; oxidation-reduction process	GO:0016702, GO:0046872, GO:0051213, GO:0055114
A01p05490.1_BnaDAR	A01	2462497	2463633	1	--*	28S ribosomal protein S30, mitochondrial	structural constituent of ribosome; mitochondrion; mitochondrial inner membrane; mitochondrial large ribosomal subunit; ribosome; translation	GO:0003735, GO:0005739, GO:0005743, GO:0005762, GO:0005840, GO:0006412
A01p05500.1_BnaDAR	A01	2469435	2470574	1	***	Ethylene-responsive transcription factor ERF043	transcription regulatory region sequence-specific DNA binding; DNA binding; DNA-binding transcription factor activity; nucleus; regulation of transcription, DNA-templated; ethylene-activated signaling pathway	GO:0000976, GO:0003677, GO:0003700, GO:0005634, GO:0006355, GO:0009873
A01p05510.1_BnaDAR	A01	2475811	2479362	8	***	VAN3-binding protein	membrane; integral component of membrane	GO:0016020, GO:0016021
A01p05520.1_BnaDAR	A01	2480548	2482735	7	*-*	Mitochondrial glycoprotein family protein, putative	mitochondrial matrix	GO:0005759
A01p05530.1_BnaDAR	A01	2483135	2484345	4	--*	NADH-quinone oxidoreductase subunit E	oxidoreductase activity; metal ion binding; iron-sulfur cluster binding; 2 iron, 2 sulfur cluster binding; oxidation-reduction process	GO:0016491, GO:0046872, GO:0051536, GO:0051537, GO:0055114
A01p05540.1_BnaDAR	A01	2485273	2485451	1	--*	Gibberellin 20 oxidase 2	response to light stimulus; response to red or far red light; gibberellin biosynthetic process; response to gibberellin; unidimensional cell growth; flower development; oxidoreductase activity; gibberellin 20-oxidase activity; metal ion binding; dioxygenase activity; oxidation-reduction process; response to karrikin	GO:0009416, GO:0009639, GO:0009686, GO:0009739, GO:0009826, GO:0009908, GO:0016491, GO:0045544, GO:0046872, GO:0051213, GO:0055114, GO:0080167
A01p05550.1_BnaDAR	A01	2488493	2489602	1	***	F-box family protein	vacuole	GO:0005773
A01p05560.1_BnaDAR	A01	2489935	2494389	10	***	target of Myb protein 1	intracellular protein transport; protein transport; membrane	GO:0006886, GO:0015031, GO:0016020
A01p05570.1_BnaDAR	A01	2502771	2509741	3	***	Histone-lysine N-methyltransferase, H3 lysine-79 specific protein	methyltransferase activity; membrane; integral component of membrane; transferase activity; methylation	GO:0008168, GO:0016020, GO:0016021, GO:0016740, GO:0032259
A01p05580.1_BnaDAR	A01	2510031	2514441	11	***	Myb-related protein 3R-1	nucleus	GO:0005634
A01p05590.1_BnaDAR	A01	2516550	2519063	10	***	BnaA01g34740D protein	nucleic acid binding; RNA binding; nucleus; RNA processing; ribonucleoprotein complex	GO:0003676, GO:0003723, GO:0005634, GO:0006396, GO:1990904
A01p05600.1_BnaDAR	A01	2521047	2521787	2	***	SCRL24	extracellular region; signal transduction	GO:0005576, GO:0007165
A01p05610.1_BnaDAR	A01	2522872	2523339	2	***	SCRL24	extracellular region; signal transduction	GO:0005576, GO:0007165
A01p05620.1_BnaDAR	A01	2524371	2525739	2	***	SCRL25	extracellular region; signal transduction	GO:0005576, GO:0007165
A01p05630.1_BnaDAR	A01	2526153	2526592	2	***	SCRL24	extracellular region; signal transduction	GO:0005576, GO:0007165
A01p05640.1_BnaDAR	A01	2526977	2530250	8	*-*	Receptor-like kinase	nucleotide binding; protein kinase activity; protein serine/threonine kinase activity; ATP binding; protein phosphorylation; membrane; integral component of membrane; kinase activity; phosphorylation; transferase activity	GO:0000166, GO:0004672, GO:0004674, GO:0005524, GO:0006468, GO:0016020, GO:0016021, GO:0016301, GO:0016310, GO:0016740
A01p05650.1_BnaDAR	A01	2530925	2544033	30	***	Helicase and polymerase-containing protein TEBICHI	nucleotide binding; nucleic acid binding; DNA binding; DNA-directed DNA polymerase activity; helicase activity; ATP binding; cytoplasm; DNA replication; DNA-dependent DNA replication; cell cycle; multicellular organism development; 5'-3' exonuclease activity; photomorphogenesis; meristem structural organization; regulation of gene expression; hydrolase activity; cell division; DNA biosynthetic pr…	GO:0000166, GO:0003676, GO:0003677, GO:0003887, GO:0004386, GO:0005524, GO:0005737, GO:0006260, GO:0006261, GO:0007049, GO:0007275, GO:0008409, GO:0009640, GO:0009933, GO:0010468, GO:0016787, GO:0051301, GO:0071897, GO:0090305, GO:1902749, GO:1990067, GO:2000011
A01p05660.1_BnaDAR	A01	2544473	2546319	2	***	Transmembrane protein	biological_process; membrane; integral component of membrane	GO:0008150, GO:0016020, GO:0016021
A01p05670.1_BnaDAR	A01	2546999	2550222	8	*-*	Membrane associated ring-CH-type finger 6	zinc ion binding; membrane; integral component of membrane	GO:0008270, GO:0016020, GO:0016021
A01p05680.1_BnaDAR	A01	2552255	2561519	9	*-*	Membrane associated ring-CH-type finger 6	ubiquitin-protein transferase activity; endoplasmic reticulum; zinc ion binding; proteasomal protein catabolic process; membrane; integral component of membrane; protein ubiquitination; enzyme binding; integral component of endoplasmic reticulum membrane; ubiquitin conjugating enzyme binding; proteasome-mediated ubiquitin-dependent protein catabolic process; ubiquitin protein ligase activity; pro…	GO:0004842, GO:0005783, GO:0008270, GO:0010498, GO:0016020, GO:0016021, GO:0016567, GO:0019899, GO:0030176, GO:0031624, GO:0043161, GO:0061630, GO:0070936, GO:1990381
A01p05690.1_BnaDAR	A01	2561733	2564743	12	***	Protein kinase	protein kinase activity; ATP binding; protein phosphorylation; kinase activity; phosphorylation	GO:0004672, GO:0005524, GO:0006468, GO:0016301, GO:0016310
A01p05700.1_BnaDAR	A01	2566262	2569937	13	***	Potassium channel protein	ion channel activity; voltage-gated potassium channel activity; ion transport; potassium ion transport; membrane; integral component of membrane; ion transmembrane transport; transmembrane transport; potassium ion transmembrane transport	GO:0005216, GO:0005249, GO:0006811, GO:0006813, GO:0016020, GO:0016021, GO:0034220, GO:0055085, GO:0071805
A01p05710.1_BnaDAR	A01	2570612	2578839	25	***	Sec24-like transport protein	intracellular protein transport; endoplasmic reticulum to Golgi vesicle-mediated transport; zinc ion binding; protein transport; COPII vesicle coat	GO:0006886, GO:0006888, GO:0008270, GO:0015031, GO:0030127
A01p05720.1_BnaDAR	A01	2579619	2582809	21	***	Arf GTPase activating protein	GTPase activator activity; positive regulation of GTPase activity	GO:0005096, GO:0043547
A01p05730.1_BnaDAR	A01	2583508	2588725	4	***	Enhancer of polycomb-like transcription factor protein	chromatin; protein binding; nucleus; DNA repair; chromatin silencing; mitotic sister chromatid cohesion; histone deacetylation; protein-containing complex	GO:0000785, GO:0005515, GO:0005634, GO:0006281, GO:0006342, GO:0007064, GO:0016575, GO:0032991
A01p05740.1_BnaDAR	A01	2591215	2597301	7	*-*	Leucine-rich repeat receptor-like protein kinase	membrane; integral component of membrane; kinase activity; phosphorylation	GO:0016020, GO:0016021, GO:0016301, GO:0016310
A01p05750.1_BnaDAR	A01	2612328	2613317	3	--*	receptor homology region, transmembrane domain- and RING domain-containing protein 2-like	vacuole; ubiquitin-dependent protein catabolic process; protein transport; membrane; integral component of membrane; protein ubiquitination; ubiquitin protein ligase activity	GO:0005773, GO:0006511, GO:0015031, GO:0016020, GO:0016021, GO:0016567, GO:0061630
A01p05760.1_BnaDAR	A01	2617138	2617365	1	--*	WRKY transcription factor	DNA binding; DNA-binding transcription factor activity; nucleus; regulation of transcription, DNA-templated; sequence-specific DNA binding	GO:0003677, GO:0003700, GO:0005634, GO:0006355, GO:0043565
A01p05770.1_BnaDAR	A01	2617378	2619075	3	***	Copper ion binding protein	copper ion binding	GO:0005507
A01p05780.1_BnaDAR	A01	2619563	2621155	3	***	Mitochondrial glycoprotein	mitochondrial matrix	GO:0005759
A01p05790.1_BnaDAR	A01	2621220	2623438	5	***	E3 ubiquitin-protein ligase	zinc ion binding; membrane; integral component of membrane	GO:0008270, GO:0016020, GO:0016021
A01p05800.1_BnaDAR	A01	2624035	2625237	6	***	Photosynthetic ndh subunit of subcomplex b 3, chloroplastic	electron transfer activity; electron transport chain; iron-sulfur cluster binding; oxidation-reduction process	GO:0009055, GO:0022900, GO:0051536, GO:0055114
A01p05810.1_BnaDAR	A01	2626769	2628823	6	***	Protein TIFY 8	protein binding; nucleus; response to wounding; regulation of defense response; regulation of jasmonic acid mediated signaling pathway	GO:0005515, GO:0005634, GO:0009611, GO:0031347, GO:2000022
A01p05820.1_BnaDAR	A01	2629203	2629442	1	--*	F-actin-capping protein subunit beta	cell morphogenesis; actin binding; protein binding; cytoplasm; cytoskeleton; F-actin capping protein complex; response to bacterium; actin cytoskeleton organization; actin filament binding; barbed-end actin filament capping; actin filament capping	GO:0000902, GO:0003779, GO:0005515, GO:0005737, GO:0005856, GO:0008290, GO:0009617, GO:0030036, GO:0051015, GO:0051016, GO:0051693
A01p05830.1_BnaDAR	A01	2629575	2632326	11	***	coiled-coil domain-containing protein 93	Golgi to plasma membrane transport	GO:0006893
A01p05840.1_BnaDAR	A01	2632327	2637561	18	***	Transcriptional corepressor LEUNIG	response to hypoxia; protein binding; nucleus; cellular response to DNA damage stimulus; response to oxidative stress; multicellular organism development; response to water deprivation; response to wounding; response to bacterium; response to fungus; response to nematode; response to auxin; flower development; regulation of flower development; polarity specification of adaxial/abaxial axis; meris…	GO:0001666, GO:0005515, GO:0005634, GO:0006974, GO:0006979, GO:0007275, GO:0009414, GO:0009611, GO:0009617, GO:0009620, GO:0009624, GO:0009733, GO:0009908, GO:0009909, GO:0009944, GO:0010073, GO:0010272, GO:0010393, GO:0030154, GO:0045892, GO:0045995, GO:0046898, GO:0048359, GO:0051512, GO:0071217, GO:0080001, GO:1902074, GO:1902183, GO:2000024
A01p05850.1_BnaDAR	A01	2650316	2652238	4	***	Flavin-containing monooxygenase	monooxygenase activity; N,N-dimethylaniline monooxygenase activity; oxidoreductase activity; flavin adenine dinucleotide binding; NADP binding; oxidation-reduction process	GO:0004497, GO:0004499, GO:0016491, GO:0050660, GO:0050661, GO:0055114
A01p05860.1_BnaDAR	A01	2659119	2660734	2	***	HXXXD-type acyl-transferase family protein	transferase activity; transferase activity, transferring acyl groups other than amino-acyl groups	GO:0016740, GO:0016747
A01p05870.1_BnaDAR	A01	2661283	2662826	4	***	V-type proton ATPase proteolipid subunit	ion transport; proton transmembrane transporter activity; membrane; integral component of membrane; proton-transporting two-sector ATPase complex, proton-transporting domain; proton-transporting V-type ATPase, V0 domain; proton transmembrane transport	GO:0006811, GO:0015078, GO:0016020, GO:0016021, GO:0033177, GO:0033179, GO:1902600
A01p05880.1_BnaDAR	A01	2663074	2669665	24	***	Serine hydroxymethyltransferase	catalytic activity; glycine hydroxymethyltransferase activity; one-carbon metabolic process; transferase activity; glycine biosynthetic process from serine; pyridoxal phosphate binding; tetrahydrofolate interconversion	GO:0003824, GO:0004372, GO:0006730, GO:0016740, GO:0019264, GO:0030170, GO:0035999
A01p05890.1_BnaDAR	A01	2670431	2673754	11	***	Potassium channel like	ion channel activity; voltage-gated potassium channel activity; ion transport; potassium ion transport; membrane; integral component of membrane; ion transmembrane transport; transmembrane transport; potassium ion transmembrane transport	GO:0005216, GO:0005249, GO:0006811, GO:0006813, GO:0016020, GO:0016021, GO:0034220, GO:0055085, GO:0071805
A01p05900.1_BnaDAR	A01	2675370	2677127	4	***	Cytochrome b-c1 complex subunit 7	mitochondrion; mitochondrial inner membrane; mitochondrial respiratory chain complex III; mitochondrial electron transport, ubiquinol to cytochrome c; membrane; oxidation-reduction process; respirasome	GO:0005739, GO:0005743, GO:0005750, GO:0006122, GO:0016020, GO:0055114, GO:0070469
A01p05910.1_BnaDAR	A01	2681026	2683618	3	***	At4g32460	plant-type cell wall; embryo development ending in seed dormancy; pectin biosynthetic process	GO:0009505, GO:0009793, GO:0045489
A01p05920.1_BnaDAR	A01	2683932	2691972	4	***	Pentatricopeptide repeat-containing protein	zinc ion binding	GO:0008270
A01p05930.1_BnaDAR	A01	2689397	2689801	1	--*	UDP-glycosyltransferase 76F1	UDP-glycosyltransferase activity; transferase activity; transferase activity, transferring glycosyl groups; quercetin 3-O-glucosyltransferase activity; quercetin 7-O-glucosyltransferase activity	GO:0008194, GO:0016740, GO:0016757, GO:0080043, GO:0080044
A01p05940.1_BnaDAR	A01	2695374	2698036	2	***	Pentatricopeptide repeat-containing protein At4g32430, mitochondrial	RNA binding; mitochondrion; RNA modification; intracellular membrane-bounded organelle; positive regulation of mitochondrial mRNA catabolic process	GO:0003723, GO:0005739, GO:0009451, GO:0043231, GO:1905639
A01p05950.1_BnaDAR	A01	2698259	2702784	14	***	Peptidyl-prolyl cis-trans isomerase CYP95	protein peptidyl-prolyl isomerization; peptidyl-prolyl cis-trans isomerase activity; isomerase activity	GO:0000413, GO:0003755, GO:0016853
A01p05960.1_BnaDAR	A01	2704069	2709286	14	***	Cellulose synthase	Golgi apparatus; trans-Golgi network; plasma membrane; plant-type primary cell wall biogenesis; membrane; integral component of membrane; transferase activity; transferase activity, transferring glycosyl groups; cellulose synthase activity; cellulose synthase (UDP-forming) activity; cellulose biosynthetic process; metal ion binding; cell wall organization	GO:0005794, GO:0005802, GO:0005886, GO:0009833, GO:0016020, GO:0016021, GO:0016740, GO:0016757, GO:0016759, GO:0016760, GO:0030244, GO:0046872, GO:0071555
A01p05970.1_BnaDAR	A01	2709425	2711369	3	***	Mitochondrial carrier protein	ATP transmembrane transporter activity; ATP transport; membrane; integral component of membrane; transmembrane transport	GO:0005347, GO:0015867, GO:0016020, GO:0016021, GO:0055085
A01p05980.1_BnaDAR	A01	2712233	2713721	1	***	Sugar phosphate/phosphate translocator like	membrane; integral component of membrane	GO:0016020, GO:0016021
A01p05990.1_BnaDAR	A01	2714362	2716520	7	*-*	ATP-dependent DNA helicase	nucleotide binding; telomere maintenance; DNA helicase activity; helicase activity; ATP binding; DNA repair; DNA recombination; cellular response to DNA damage stimulus; hydrolase activity; DNA duplex unwinding	GO:0000166, GO:0000723, GO:0003678, GO:0004386, GO:0005524, GO:0006281, GO:0006310, GO:0006974, GO:0016787, GO:0032508
A01p06000.1_BnaDAR	A01	2718573	2719662	2	***	F-box protein ETP2	protein binding	GO:0005515
A01p06010.1_BnaDAR	A01	2720332	2723770	8	***	Pectin lyase-like superfamily protein	polygalacturonase activity; cell wall; carbohydrate metabolic process; metabolic process; hydrolase activity; hydrolase activity, acting on glycosyl bonds; lyase activity	GO:0004650, GO:0005618, GO:0005975, GO:0008152, GO:0016787, GO:0016798, GO:0016829
A01p06020.1_BnaDAR	A01	2724612	2727500	6	***	Regulator of Vps4 activity in the MVB pathway protein	molecular_function; protein localization; protein transport	GO:0003674, GO:0008104, GO:0015031
A01p06030.1_BnaDAR	A01	2728479	2730356	3	***	Tetratricopeptide repeat (TPR)-like superfamily protein	molecular_function; cellular_component; biological_process	GO:0003674, GO:0005575, GO:0008150
A01p06040.1_BnaDAR	A01	2730547	2733603	9	***	Protein WVD2-like 5	microtubule bundle formation; cytoplasm; cytoskeleton; microtubule; microtubule binding; cellular response to ethylene stimulus	GO:0001578, GO:0005737, GO:0005856, GO:0005874, GO:0008017, GO:0071369
A01p06050.1_BnaDAR	A01	2737613	2740066	2	***	Receptor protein kinase	nucleotide binding; protein kinase activity; protein serine/threonine kinase activity; ATP binding; plasma membrane; protein phosphorylation; membrane; integral component of membrane; kinase activity; phosphorylation; transferase activity; ubiquitin protein ligase binding; protein autophosphorylation; NA; NA	GO:0000166, GO:0004672, GO:0004674, GO:0005524, GO:0005886, GO:0006468, GO:0016020, GO:0016021, GO:0016301, GO:0016310, GO:0016740, GO:0031625, GO:0046777, GO:0106310, GO:0106311
A01p06060.1_BnaDAR	A01	2741176	2743817	9	--*	RAC-alpha serine/threonine-protein kinase	nucleotide binding; osteoblast differentiation; maternal placenta development; positive regulation of protein phosphorylation; positive regulation of endothelial cell proliferation; cell migration involved in sprouting angiogenesis; protein kinase activity; protein serine/threonine kinase activity; protein serine/threonine/tyrosine kinase activity; protein kinase C binding; protein binding; calmo…	GO:0000166, GO:0001649, GO:0001893, GO:0001934, GO:0001938, GO:0002042, GO:0004672, GO:0004674, GO:0004712, GO:0005080, GO:0005515, GO:0005516, GO:0005524, GO:0005547, GO:0005634, GO:0005654, GO:0005737, GO:0005739, GO:0005819, GO:0005829, GO:0005886, GO:0005911, GO:0005975, GO:0005977, GO:0005978, GO:0005979, GO:0006006, GO:0006412, GO:0006417, GO:0006468, GO:0006469, GO:0006606, GO:0006915, GO:…
A01p06070.1_BnaDAR	A01	2744841	2747790	1	***	Receptor protein kinase	nucleotide binding; protein kinase activity; protein serine/threonine kinase activity; ATP binding; plasma membrane; protein phosphorylation; membrane; integral component of membrane; kinase activity; phosphorylation; transferase activity; ubiquitin protein ligase binding; protein autophosphorylation; NA; NA	GO:0000166, GO:0004672, GO:0004674, GO:0005524, GO:0005886, GO:0006468, GO:0016020, GO:0016021, GO:0016301, GO:0016310, GO:0016740, GO:0031625, GO:0046777, GO:0106310, GO:0106311
A01p06080.1_BnaDAR	A01	2754162	2755659	3	***	Histone acetyltransferase	transcription coregulator activity; protein binding; nucleus; regulation of transcription, DNA-templated; transferase activity	GO:0003712, GO:0005515, GO:0005634, GO:0006355, GO:0016740
A01p06090.1_BnaDAR	A01	2757112	2758440	1	***	Core-2/I-branching beta-1,6-N-acetylglucosaminyltransferase family protein, putative	membrane; transferase activity; transferase activity, transferring glycosyl groups	GO:0016020, GO:0016740, GO:0016757
A01p06100.1_BnaDAR	A01	2759007	2761457	2	***	Clathrin assembly protein AP180	phospholipid binding; 1-phosphatidylinositol binding; Golgi apparatus; clathrin-coated pit; endocytosis; clathrin-coated vesicle; clathrin binding; cytoplasmic vesicle; clathrin coat assembly	GO:0005543, GO:0005545, GO:0005794, GO:0005905, GO:0006897, GO:0030136, GO:0030276, GO:0031410, GO:0048268
A01p06110.1_BnaDAR	A01	2763168	2764419	4	***	Auxin-responsive protein	nucleus; regulation of transcription, DNA-templated; auxin-activated signaling pathway	GO:0005634, GO:0006355, GO:0009734
A01p06120.1_BnaDAR	A01	2769771	2770823	6	***	UDP-sugar transporter like	nucleotide-sugar transmembrane transporter activity; carbohydrate transport; nucleobase-containing compound transport; membrane; integral component of membrane; carbohydrate derivative transport	GO:0005338, GO:0008643, GO:0015931, GO:0016020, GO:0016021, GO:1901264
A01p06130.1_BnaDAR	A01	2771465	2772655	5	***	U11/U12 small nuclear ribonucleoprotein 25 kDa protein	mRNA splicing, via spliceosome; U12-type spliceosomal complex	GO:0000398, GO:0005689
A01p06140.1_BnaDAR	A01	2772705	2777356	8	***	Kinase family protein	protein kinase activity; ATP binding; protein phosphorylation; chloroplast; plastid; de-etiolation; chloroplast envelope; Toc complex; membrane; integral component of membrane; kinase activity; phosphorylation; integral component of chloroplast outer membrane; positive regulation of protein import into chloroplast stroma	GO:0004672, GO:0005524, GO:0006468, GO:0009507, GO:0009536, GO:0009704, GO:0009941, GO:0010006, GO:0016020, GO:0016021, GO:0016301, GO:0016310, GO:0031359, GO:1904216
A01p06150.1_BnaDAR	A01	2777988	2780764	2	***	Myosin heavy chain-related protein	protein binding; reciprocal meiotic recombination; chloroplast; regulation of starch biosynthetic process; starch biosynthetic process	GO:0005515, GO:0007131, GO:0009507, GO:0010581, GO:0019252
A01p06160.1_BnaDAR	A01	2783298	2788791	21	***	Pantothenate kinase 2	nucleotide binding; pantothenate kinase activity; ATP binding; nucleus; cytosol; coenzyme A biosynthetic process; kinase activity; phosphorylation; transferase activity; metal ion binding	GO:0000166, GO:0004594, GO:0005524, GO:0005634, GO:0005829, GO:0015937, GO:0016301, GO:0016310, GO:0016740, GO:0046872
A01p06170.1_BnaDAR	A01	2789117	2792959	10	***	Phox (PX) domain-containing protein	phosphatidylinositol binding	GO:0035091
A01p06180.1_BnaDAR	A01	2795573	2802984	18	***	Hexosyltransferase	Golgi membrane; Golgi apparatus; protein glycosylation; membrane; integral component of membrane; transferase activity, transferring glycosyl groups	GO:0000139, GO:0005794, GO:0006486, GO:0016020, GO:0016021, GO:0016757
A01p06190.1_BnaDAR	A01	2803165	2808079	4	*-*	Beta-1,3-N-Acetylglucosaminyltransferase family protein	cell fate determination; transferase activity; transferase activity, transferring glycosyl groups	GO:0001709, GO:0016740, GO:0016757
A01p06200.1_BnaDAR	A01	2810585	2811097	2	***	Beta-1,3-N-Acetylglucosaminyltransferase family protein	cell fate determination; transferase activity; transferase activity, transferring glycosyl groups	GO:0001709, GO:0016740, GO:0016757
A01p06210.1_BnaDAR	A01	2812363	2812911	2	***	Beta-1,3-N-Acetylglucosaminyltransferase family protein	cell fate determination; transferase activity; transferase activity, transferring glycosyl groups	GO:0001709, GO:0016740, GO:0016757
A01p06220.1_BnaDAR	A01	2813919	2816894	3	***	Octicosapeptide/Phox/Bem1p (PB1) domain-containing protein / tetratricopeptide repeat (TPR)-containing protein	plastid; thylakoid	GO:0009536, GO:0009579
A01p06230.1_BnaDAR	A01	2817191	2819428	7	***	Calcium uptake protein 1, mitochondrial	calcium ion binding; mitochondrial calcium ion transmembrane transport	GO:0005509, GO:0006851
A01p06240.1_BnaDAR	A01	2819692	2824370	18	*-*	Neurochondrin family protein	Golgi apparatus	GO:0005794
A01p06250.1_BnaDAR	A01	2825228	2827197	5	***	Homeobox protein knotted-1-like 5	nuclear chromatin; RNA polymerase II cis-regulatory region sequence-specific DNA binding; DNA-binding transcription factor activity, RNA polymerase II-specific; DNA binding; DNA-binding transcription factor activity; protein binding; nucleus; regulation of transcription, DNA-templated; regulation of transcription by RNA polymerase II; detection of ethylene stimulus; cellular response to ethylene …	GO:0000790, GO:0000978, GO:0000981, GO:0003677, GO:0003700, GO:0005515, GO:0005634, GO:0006355, GO:0006357, GO:0009727, GO:0071369
A01p06260.1_BnaDAR	A01	2828118	2830330	5	***	At4g32030	molecular_function; biological_process	GO:0003674, GO:0008150
A01p06270.1_BnaDAR	A01	2831280	2831652	1	--*	GF14 protein phi chain	0
A01p06280.1_BnaDAR	A01	2831720	2832933	1	***	AT4g32020/F10N7_170	biological_process	GO:0008150
A01p06290.1_BnaDAR	A01	2839566	2845327	12	***	Aspartate aminotransferase	nucleotide binding; catalytic activity; L-aspartate:2-oxoglutarate aminotransferase activity; protein kinase activity; ATP binding; protein phosphorylation; cellular amino acid metabolic process; transaminase activity; biosynthetic process; kinase activity; phosphorylation; transferase activity; pyridoxal phosphate binding	GO:0000166, GO:0003824, GO:0004069, GO:0004672, GO:0005524, GO:0006468, GO:0006520, GO:0008483, GO:0009058, GO:0016301, GO:0016310, GO:0016740, GO:0030170
A01p06300.1_BnaDAR	A01	2845693	2846215	2	***	60S ribosomal protein L39	mRNA binding; structural constituent of ribosome; ribosome; translation; cytosolic large ribosomal subunit	GO:0003729, GO:0003735, GO:0005840, GO:0006412, GO:0022625
A01p06310.1_BnaDAR	A01	2846326	2850115	4	***	DeSI-like protein	hydrolase activity	GO:0016787
A01p06320.1_BnaDAR	A01	2852926	2859963	28	***	Chromodomain helicase DNA binding protein, putative	nucleotide binding; helicase activity; iron ion binding; ATP binding; nucleus; protein phosphorylation; transferase activity; hydrolase activity; metal ion binding; NA; NA	GO:0000166, GO:0004386, GO:0005506, GO:0005524, GO:0005634, GO:0006468, GO:0016740, GO:0016787, GO:0046872, GO:0106310, GO:0106311
A01p06330.1_BnaDAR	A01	2863993	2865282	1	--*	Ribonuclease H-like superfamily protein	nucleic acid binding; RNA-DNA hybrid ribonuclease activity; cellular_component; biological_process; RNA phosphodiester bond hydrolysis, endonucleolytic	GO:0003676, GO:0004523, GO:0005575, GO:0008150, GO:0090502
A01p06340.1_BnaDAR	A01	2866327	2871669	19	*-*	CHD3-type chromatin-remodeling factor PICKLE	nucleotide binding; DNA binding; helicase activity; ATP binding; nucleus; chromatin organization; chromatin remodeling; response to auxin; cytokinin-activated signaling pathway; response to gibberellin; negative regulation of abscisic acid-activated signaling pathway; hydrolase activity; negative regulation of transcription, DNA-templated; metal ion binding; root development; cell division; regul…	GO:0000166, GO:0003677, GO:0004386, GO:0005524, GO:0005634, GO:0006325, GO:0006338, GO:0009733, GO:0009736, GO:0009739, GO:0009788, GO:0016787, GO:0045892, GO:0046872, GO:0048364, GO:0051301, GO:2000023
A01p06350.1_BnaDAR	A01	2878551	2879827	5	*-*	UPF0725 protein At2g20620	molecular_function	GO:0003674
A01p06360.1_BnaDAR	A01	2883726	2886608	3	*-*	RING-type E3 ubiquitin transferase	ubiquitin-protein transferase activity; nucleus; cytoplasm; cell surface receptor signaling pathway; protein ubiquitination	GO:0004842, GO:0005634, GO:0005737, GO:0007166, GO:0016567
A01p06370.1_BnaDAR	A01	2888954	2894394	14	*-*	Sister chromatid cohesion protein PDS5	nucleus; cell cycle; mitotic sister chromatid cohesion; cell division	GO:0005634, GO:0007049, GO:0007064, GO:0051301
A01p06380.1_BnaDAR	A01	2900852	2901689	6	*-*	Purple acid phosphatase	acid phosphatase activity; dephosphorylation; hydrolase activity; metal ion binding	GO:0003993, GO:0016311, GO:0016787, GO:0046872
A01p06390.1_BnaDAR	A01	2902533	2902695	2	--*	Cathepsin L1	endopeptidase activity; cysteine-type endopeptidase activity; protein binding; extracellular region; extracellular space; lysosome; plasma membrane; proteolysis; peptidase activity; cysteine-type peptidase activity; membrane; apical plasma membrane; protein autoprocessing; hydrolase activity; collagen catabolic process; cytoplasmic vesicle; zymogen activation; enkephalin processing; chromaffin gr…	GO:0004175, GO:0004197, GO:0005515, GO:0005576, GO:0005615, GO:0005764, GO:0005886, GO:0006508, GO:0008233, GO:0008234, GO:0016020, GO:0016324, GO:0016540, GO:0016787, GO:0030574, GO:0031410, GO:0031638, GO:0034230, GO:0042583, GO:0043373, GO:0048002, GO:0060309
A01p06400.1_BnaDAR	A01	2908056	2909927	1	***	BnaA09g38560D protein	nucleic acid binding; zinc ion binding	GO:0003676, GO:0008270
A01p06410.1_BnaDAR	A01	2910260	2912238	2	--*	Peptidase C78, ubiquitin fold modifier-specific peptidase 1/ 2	0
A01p06420.1_BnaDAR	A01	2914250	2914642	1	***	At4g31872/At4g31872	biological_process	GO:0008150
A01p06430.1_BnaDAR	A01	2915255	2918717	1	***	Pentatricopeptide repeat-containing protein	methyltransferase activity; membrane; integral component of membrane; transferase activity; methylation	GO:0008168, GO:0016020, GO:0016021, GO:0016740, GO:0032259
A01p06440.1_BnaDAR	A01	2919261	2920102	2	***	Early nodulin-like protein 1	electron transfer activity; electron transport chain	GO:0009055, GO:0022900
A01p06450.1_BnaDAR	A01	2920708	2921010	1	***	Transmembrane protein	membrane; integral component of membrane	GO:0016020, GO:0016021
A01p06460.1_BnaDAR	A01	2927924	2931437	4	***	BTB/POZ domain-containing protein NPY1	endosome; late endosome; plasma membrane; flower development; positive regulation of flower development; inflorescence development; basipetal auxin transport; protein ubiquitination; apical protein localization; cotyledon development; phyllome development; auxin transport; plant organ development	GO:0005768, GO:0005770, GO:0005886, GO:0009908, GO:0009911, GO:0010229, GO:0010540, GO:0016567, GO:0045176, GO:0048825, GO:0048827, GO:0060918, GO:0099402
A01p06470.1_BnaDAR	A01	2931736	2932880	1	***	F-box/kelch-repeat protein At4g33900	molecular_function; cellular_component; biological_process	GO:0003674, GO:0005575, GO:0008150
A01p06480.1_BnaDAR	A01	2934132	2935440	5	***	WRKY like transcription factor	DNA binding; DNA-binding transcription factor activity; nucleus; regulation of transcription, DNA-templated; sequence-specific DNA binding	GO:0003677, GO:0003700, GO:0005634, GO:0006355, GO:0043565
A01p06490.1_BnaDAR	A01	2939855	2941656	4	***	Diphthine synthase	diphthine synthase activity; methyltransferase activity; transferase activity; peptidyl-diphthamide biosynthetic process from peptidyl-histidine; methylation	GO:0004164, GO:0008168, GO:0016740, GO:0017183, GO:0032259
A01p06500.1_BnaDAR	A01	2942104	2944655	8	***	Monogalactosyldiacylglycerol synthase	glycolipid biosynthetic process; membrane; transferase activity; transferase activity, transferring glycosyl groups; transferase activity, transferring hexosyl groups; 1,2-diacylglycerol 3-beta-galactosyltransferase activity	GO:0009247, GO:0016020, GO:0016740, GO:0016757, GO:0016758, GO:0046509
A01p06510.1_BnaDAR	A01	2948422	2950732	9	***	Protein phosphatase 2c, putative	phosphoprotein phosphatase activity; protein serine/threonine phosphatase activity; nucleus; cytosol; protein dephosphorylation; hydrolase activity; phosphatase activity; cation binding; metal ion binding; protein serine phosphatase activity; protein threonine phosphatase activity	GO:0004721, GO:0004722, GO:0005634, GO:0005829, GO:0006470, GO:0016787, GO:0016791, GO:0043169, GO:0046872, GO:0106306, GO:0106307
A01p06520.1_BnaDAR	A01	2950993	2953033	7	***	ADP-ribosylation factor	nucleotide binding; GTP binding	GO:0000166, GO:0005525
A01p06530.1_BnaDAR	A01	2954463	2954805	1	--*	Ribosomal RNA large subunit methyltransferase E	RNA methylation; cytoplasm; rRNA processing; methyltransferase activity; rRNA (uridine-2'-O-)-methyltransferase activity; transferase activity; rRNA methylation; methylation	GO:0001510, GO:0005737, GO:0006364, GO:0008168, GO:0008650, GO:0016740, GO:0031167, GO:0032259
A01p06540.1_BnaDAR	A01	2954984	2955169	1	--*	Mitogen-activated protein kinase kinase kinase kinase 1	nucleotide binding; activation of MAPKKK activity; protein kinase activity; protein serine/threonine kinase activity; protein binding; ATP binding; protein phosphorylation; activation of JUN kinase activity; cell population proliferation; MAP kinase kinase kinase kinase activity; membrane; kinase activity; phosphorylation; transferase activity; peptidyl-serine phosphorylation; intracellular signa…	GO:0000166, GO:0000185, GO:0004672, GO:0004674, GO:0005515, GO:0005524, GO:0006468, GO:0007257, GO:0008283, GO:0008349, GO:0016020, GO:0016301, GO:0016310, GO:0016740, GO:0018105, GO:0035556, GO:0046777, GO:0106310, GO:0106311, GO:1904628
A01p06550.1_BnaDAR	A01	2960566	2960874	1	--*	PDZ and LIM domain protein 7	ossification; stress fiber; ruffle; actin binding; protein binding; nucleoplasm; cytoplasm; cytosol; cytoskeleton; adherens junction; focal adhesion; receptor-mediated endocytosis; multicellular organism development; axon guidance; heart development; actin cytoskeleton; Z disc; actin cytoskeleton organization; cell differentiation; filamentous actin; metal ion binding; muscle alpha-actinin bindin…	GO:0001503, GO:0001725, GO:0001726, GO:0003779, GO:0005515, GO:0005654, GO:0005737, GO:0005829, GO:0005856, GO:0005912, GO:0005925, GO:0006898, GO:0007275, GO:0007411, GO:0007507, GO:0015629, GO:0030018, GO:0030036, GO:0030154, GO:0031941, GO:0046872, GO:0051371, GO:0061061
A01p06560.1_BnaDAR	A01	2961279	2963011	7	***	Transcription initiation factor TFIID subunit 10	protein binding; nucleus; DNA-templated transcription, initiation	GO:0005515, GO:0005634, GO:0006352
A01p06570.1_BnaDAR	A01	2963102	2964601	4	***	O-methyltransferase family protein	methyltransferase activity; O-methyltransferase activity; S-adenosylmethionine-dependent methyltransferase activity; transferase activity; aromatic compound biosynthetic process; methylation; protein dimerization activity	GO:0008168, GO:0008171, GO:0008757, GO:0016740, GO:0019438, GO:0032259, GO:0046983
A01p06580.1_BnaDAR	A01	2965599	2967289	5	***	40S ribosomal protein S6	structural constituent of ribosome; ribosome; translation	GO:0003735, GO:0005840, GO:0006412
A01p06590.1_BnaDAR	A01	2967719	2980875	14	***	Ubiquitin carboxyl-terminal hydrolase family protein	thiol-dependent ubiquitin-specific protease activity; proteolysis; ubiquitin-dependent protein catabolic process; peptidase activity; cysteine-type peptidase activity; membrane; integral component of membrane; protein deubiquitination; hydrolase activity	GO:0004843, GO:0006508, GO:0006511, GO:0008233, GO:0008234, GO:0016020, GO:0016021, GO:0016579, GO:0016787
A01p06600.1_BnaDAR	A01	2974878	2975943	4	*-*	30S ribosomal protein S1-like	nucleic acid binding; ribosome	GO:0003676, GO:0005840
A01p06610.1_BnaDAR	A01	2976831	2978457	6	***	B3 domain-containing protein REM9	DNA binding; nucleus; response to cold; chloroplast envelope	GO:0003677, GO:0005634, GO:0009409, GO:0009941
A01p06620.1_BnaDAR	A01	2987659	2989558	5	***	BnaA01g34750D protein	DNA binding; nucleus	GO:0003677, GO:0005634
A01p06630.1_BnaDAR	A01	2991295	2993333	6	***	BnaA01g34850D protein	DNA binding; nucleus	GO:0003677, GO:0005634
A01p06640.1_BnaDAR	A01	2993866	2994195	1	--*	AT hook motif-containing protein	biological_process	GO:0008150
A01p06650.1_BnaDAR	A01	2995909	3001271	12	***	B3 domain-containing protein REM1	DNA binding; nucleus; flower development	GO:0003677, GO:0005634, GO:0009908
A01p06660.1_BnaDAR	A01	3001662	3010098	10	***	Xyloglucan glycosyltransferase	membrane; integral component of membrane; transferase activity	GO:0016020, GO:0016021, GO:0016740
A01p06670.1_BnaDAR	A01	3010823	3019190	12	*-*	Nucleoporin	membrane; integral component of membrane	GO:0016020, GO:0016021
A01p06680.1_BnaDAR	A01	3024568	3025948	3	***	WRKY transcription factor 74	DNA binding; DNA-binding transcription factor activity; nucleus; regulation of transcription, DNA-templated; sequence-specific DNA binding	GO:0003677, GO:0003700, GO:0005634, GO:0006355, GO:0043565
A01p06690.1_BnaDAR	A01	3028215	3030824	1	***	Exocyst subunit Exo70 family protein	exocyst; exocytosis; protein transport	GO:0000145, GO:0006887, GO:0015031
A01p06700.1_BnaDAR	A01	3031264	3033352	2	***	Cytochrome P450, putative	monooxygenase activity; iron ion binding; oxidoreductase activity; oxidoreductase activity, acting on paired donors, with incorporation or reduction of molecular oxygen; heme binding; metal ion binding; oxidation-reduction process	GO:0004497, GO:0005506, GO:0016491, GO:0016705, GO:0020037, GO:0046872, GO:0055114
A01p06710.1_BnaDAR	A01	3034699	3036278	6	--*	Replicase polyprotein 1ab	nucleotide binding; transcription, RNA-templated; nucleic acid binding; DNA helicase activity; RNA binding; RNA helicase activity; single-stranded RNA binding; RNA-directed 5'-3' RNA polymerase activity; cysteine-type endopeptidase activity; helicase activity; nuclease activity; endonuclease activity; exonuclease activity; thiol-dependent ubiquitin-specific protease activity; protein binding; ATP…	GO:0000166, GO:0001172, GO:0003676, GO:0003678, GO:0003723, GO:0003724, GO:0003727, GO:0003968, GO:0004197, GO:0004386, GO:0004518, GO:0004519, GO:0004527, GO:0004843, GO:0005515, GO:0005524, GO:0006351, GO:0006508, GO:0008168, GO:0008233, GO:0008234, GO:0008242, GO:0008270, GO:0016020, GO:0016021, GO:0016032, GO:0016740, GO:0016779, GO:0016787, GO:0019079, GO:0019082, GO:0030430, GO:0030683, GO:…
A01p06720.1_BnaDAR	A01	3038580	3039275	2	***	Beta-1,3-N-Acetylglucosaminyltransferase family protein	cell fate determination; transferase activity; transferase activity, transferring glycosyl groups	GO:0001709, GO:0016740, GO:0016757
A01p06730.1_BnaDAR	A01	3040738	3041259	2	***	Beta-1,3-N-Acetylglucosaminyltransferase family protein	cell fate determination; transferase activity; transferase activity, transferring glycosyl groups	GO:0001709, GO:0016740, GO:0016757
A01p06740.1_BnaDAR	A01	3043966	3044214	1	***	Beta-1,3-N-acetylglucosaminyltransferase family protein	cell fate determination; transferase activity; transferase activity, transferring glycosyl groups	GO:0001709, GO:0016740, GO:0016757
A01p06750.1_BnaDAR	A01	3045053	3045257	2	*-*	Exocyst subunit Exo70 family protein	exocyst; exocytosis; protein transport	GO:0000145, GO:0006887, GO:0015031
A01p06760.1_BnaDAR	A01	3046122	3048191	2	***	Cytochrome P450, putative	monooxygenase activity; iron ion binding; oxidoreductase activity; oxidoreductase activity, acting on paired donors, with incorporation or reduction of molecular oxygen; heme binding; metal ion binding; oxidation-reduction process	GO:0004497, GO:0005506, GO:0016491, GO:0016705, GO:0020037, GO:0046872, GO:0055114
A01p06770.1_BnaDAR	A01	3051728	3052304	2	--*	ADP-ribosylation factor GTPase-activating protein AGD1	GTPase activator activity; cytoplasm; endosome; plasma membrane; cytoskeleton organization; endocytic vesicle; root hair; positive regulation of GTPase activity; metal ion binding; root hair cell tip growth	GO:0005096, GO:0005737, GO:0005768, GO:0005886, GO:0007010, GO:0030139, GO:0035618, GO:0043547, GO:0046872, GO:0048768
A01p06780.1_BnaDAR	A01	3052415	3053028	3	--*	Tyrosine-protein phosphatase DSP3	phosphoprotein phosphatase activity; protein tyrosine phosphatase activity; protein binding; nucleus; cytoplasm; protein dephosphorylation; dephosphorylation; hydrolase activity; phosphatase activity; peptidyl-tyrosine dephosphorylation	GO:0004721, GO:0004725, GO:0005515, GO:0005634, GO:0005737, GO:0006470, GO:0016311, GO:0016787, GO:0016791, GO:0035335
A01p06790.1_BnaDAR	A01	3053079	3053838	1	***	Thioredoxin reductase	thioredoxin-disulfide reductase activity; cytoplasm; oxidoreductase activity; removal of superoxide radicals; oxidation-reduction process	GO:0004791, GO:0005737, GO:0016491, GO:0019430, GO:0055114
A01p06800.1_BnaDAR	A01	3054700	3058252	4	***	Coatomer subunit beta	Golgi membrane; structural molecule activity; cytoplasm; Golgi apparatus; intracellular protein transport; protein transport; membrane; vesicle-mediated transport; membrane coat; COPI vesicle coat; COPI-coated vesicle membrane; cytoplasmic vesicle	GO:0000139, GO:0005198, GO:0005737, GO:0005794, GO:0006886, GO:0015031, GO:0016020, GO:0016192, GO:0030117, GO:0030126, GO:0030663, GO:0031410
A01p06810.1_BnaDAR	A01	3059064	3060608	2	***	Ribosomal protein L28 family protein	mRNA binding; structural constituent of ribosome; ribosome; translation	GO:0003729, GO:0003735, GO:0005840, GO:0006412
A01p06820.1_BnaDAR	A01	3060677	3062252	5	***	UPF0725 protein At2g20620	molecular_function	GO:0003674
A01p06830.1_BnaDAR	A01	3063359	3063749	2	---	Suppressor of cytokine signaling 5	negative regulation of signal transduction; intracellular signal transduction; regulation of growth	GO:0009968, GO:0035556, GO:0040008
A01p06840.1_BnaDAR	A01	3064136	3065496	2	***	Transcriptional adapter 1	nucleus; SAGA-type complex	GO:0005634, GO:0070461
A01p06850.1_BnaDAR	A01	3066735	3070193	12	*-*	nuclear pore complex protein NUP1-like isoform X1	nuclear envelope; nuclear membrane organization	GO:0005635, GO:0071763
A01p06860.1_BnaDAR	A01	3071335	3073068	5	***	Zinc finger family protein	nucleic acid binding; cytoplasm; cytosol; zinc ion binding; cold acclimation; positive regulation of ribosome biogenesis	GO:0003676, GO:0005737, GO:0005829, GO:0008270, GO:0009631, GO:0090070
A01p06870.1_BnaDAR	A01	3073175	3074937	4	***	DUF1644 family protein	membrane; integral component of membrane	GO:0016020, GO:0016021
A01p06880.1_BnaDAR	A01	3075661	3079117	13	***	Protein kinase domain	protein kinase activity; ATP binding; protein phosphorylation; kinase activity; phosphorylation	GO:0004672, GO:0005524, GO:0006468, GO:0016301, GO:0016310
A01p06890.1_BnaDAR	A01	3080961	3082095	5	*--	Nucleic acid-binding, OB-fold-like protein	telomere maintenance; double-strand break repair via homologous recombination; damaged DNA binding; single-stranded DNA binding; DNA replication factor A complex; DNA-dependent DNA replication; DNA unwinding involved in DNA replication; DNA repair; nucleotide-excision repair; telomere maintenance via telomerase; plasmodesma; single-stranded telomeric DNA binding; sequence-specific DNA binding; me…	GO:0000723, GO:0000724, GO:0003684, GO:0003697, GO:0005662, GO:0006261, GO:0006268, GO:0006281, GO:0006289, GO:0007004, GO:0009506, GO:0043047, GO:0043565, GO:0051321
A01p06900.1_BnaDAR	A01	3082388	3082897	2	***	Replication protein A 70 kDa DNA-binding subunit C	DNA binding	GO:0003677
A01p06910.1_BnaDAR	A01	3085463	3086088	1	***	Flowering-promoting factor 1-like protein 1	regulation of flower development; vegetative to reproductive phase transition of meristem	GO:0009909, GO:0010228
A01p06920.1_BnaDAR	A01	3086671	3088259	1	*-*	BnaA08g28590D protein	membrane; integral component of membrane	GO:0016020, GO:0016021
A01p06930.1_BnaDAR	A01	3097130	3097949	4	*-*	U11/U12 small nuclear ribonucleoprotein 35 kDa protein	mRNA splicing, via spliceosome; nucleic acid binding; mRNA binding; protein binding; nucleus; spliceosomal complex; U12-type spliceosomal complex; mRNA processing; RNA splicing; nuclear speck; snRNA binding; U11/U12 snRNP	GO:0000398, GO:0003676, GO:0003729, GO:0005515, GO:0005634, GO:0005681, GO:0005689, GO:0006397, GO:0008380, GO:0016607, GO:0017069, GO:0034693
A01p06940.1_BnaDAR	A01	3099114	3100647	4	***	selenoprotein H-like	cytoplasm; Golgi apparatus	GO:0005737, GO:0005794
A01p06950.1_BnaDAR	A01	3100963	3103740	11	***	Core-2/I-branching beta-1,6-N-acetylglucosaminyltransferase family protein	membrane; integral component of membrane; transferase activity; transferase activity, transferring glycosyl groups	GO:0016020, GO:0016021, GO:0016740, GO:0016757
A01p06960.1_BnaDAR	A01	3104659	3105708	1	***	Transmembrane protein, putative	membrane; integral component of membrane	GO:0016020, GO:0016021
A01p06970.1_BnaDAR	A01	3106151	3109937	15	***	Myosin heavy chain-like protein	membrane; integral component of membrane	GO:0016020, GO:0016021
A01p06980.1_BnaDAR	A01	3111625	3112821	3	***	Plant/F12B17-70 protein	membrane; integral component of membrane	GO:0016020, GO:0016021
A01p06990.1_BnaDAR	A01	3118532	3119305	1	***	Auxin-responsive protein	response to auxin	GO:0009733
A01p07000.1_BnaDAR	A01	3121076	3124054	17	***	Proteasome subunit beta type	proteasome complex; threonine-type endopeptidase activity; nucleus; cytoplasm; proteasome core complex; proteolysis; peptidase activity; hydrolase activity; proteolysis involved in cellular protein catabolic process	GO:0000502, GO:0004298, GO:0005634, GO:0005737, GO:0005839, GO:0006508, GO:0008233, GO:0016787, GO:0051603
A01p07010.1_BnaDAR	A01	3123196	3125403	15	***	Gamma-glutamylcyclotransferase	gamma-glutamylcyclotransferase activity; cytoplasm; glutathione catabolic process	GO:0003839, GO:0005737, GO:0006751
A01p07020.1_BnaDAR	A01	3128239	3137763	11	***	BnaA01g05970D protein	protein kinase activity; ATP binding; protein phosphorylation; membrane; integral component of membrane	GO:0004672, GO:0005524, GO:0006468, GO:0016020, GO:0016021
A01p07030.1_BnaDAR	A01	3137815	3144434	23	***	DNA topoisomerase 1	DNA binding; DNA topoisomerase activity; DNA topoisomerase type I (single strand cut, ATP-independent) activity; chromosome; DNA topological change; isomerase activity; metal ion binding	GO:0003677, GO:0003916, GO:0003917, GO:0005694, GO:0006265, GO:0016853, GO:0046872
A01p07040.1_BnaDAR	A01	3144987	3147355	3	***	Calcium homeostasis endoplasmic reticulum protein	RNA binding; RNA processing; mRNA processing; cellular calcium ion homeostasis	GO:0003723, GO:0006396, GO:0006397, GO:0006874
A01p07050.1_BnaDAR	A01	3147499	3150175	9	***	Aspartate--tRNA ligase, cytoplasmic	nucleotide binding; DNA binding; aminoacyl-tRNA ligase activity; aspartate-tRNA ligase activity; ATP binding; cytoplasm; translation; tRNA aminoacylation for protein translation; aspartyl-tRNA aminoacylation; ligase activity	GO:0000166, GO:0003677, GO:0004812, GO:0004815, GO:0005524, GO:0005737, GO:0006412, GO:0006418, GO:0006422, GO:0016874
A01p07060.1_BnaDAR	A01	3150552	3152850	3	***	Kinase family protein	protein kinase activity; ATP binding; protein phosphorylation; root epidermal cell differentiation; kinase activity; phosphorylation	GO:0004672, GO:0005524, GO:0006468, GO:0010053, GO:0016301, GO:0016310
A01p07070.1_BnaDAR	A01	3153927	3156150	2	***	Glucan endo-1,3-beta-glucosidase-like protein	hydrolase activity, hydrolyzing O-glycosyl compounds; carbohydrate metabolic process; metabolic process; hydrolase activity; hydrolase activity, acting on glycosyl bonds; glucan endo-1,3-beta-D-glucosidase activity; anchored component of plasma membrane	GO:0004553, GO:0005975, GO:0008152, GO:0016787, GO:0016798, GO:0042973, GO:0046658
A01p07080.1_BnaDAR	A01	3160898	3162194	4	***	Transmembrane protein, putative	membrane; integral component of membrane	GO:0016020, GO:0016021
A01p07090.1_BnaDAR	A01	3164271	3166780	3	***	Kinase	protein kinase activity; protein serine/threonine kinase activity; calcium ion binding; ATP binding; plasma membrane; protein phosphorylation; membrane; integral component of membrane; kinase activity; phosphorylation; polysaccharide binding	GO:0004672, GO:0004674, GO:0005509, GO:0005524, GO:0005886, GO:0006468, GO:0016020, GO:0016021, GO:0016301, GO:0016310, GO:0030247
A01p07100.1_BnaDAR	A01	3176867	3179181	4	***	BnaA01g06060D protein	protein kinase activity; protein serine/threonine kinase activity; ATP binding; plasma membrane; protein phosphorylation; cell surface receptor signaling pathway; membrane; integral component of membrane	GO:0004672, GO:0004674, GO:0005524, GO:0005886, GO:0006468, GO:0007166, GO:0016020, GO:0016021
A01p07110.1_BnaDAR	A01	3181171	3183946	3	***	Kinase	protein kinase activity; protein serine/threonine kinase activity; calcium ion binding; ATP binding; plasma membrane; protein phosphorylation; membrane; integral component of membrane; kinase activity; phosphorylation; polysaccharide binding	GO:0004672, GO:0004674, GO:0005509, GO:0005524, GO:0005886, GO:0006468, GO:0016020, GO:0016021, GO:0016301, GO:0016310, GO:0030247
A01p07120.1_BnaDAR	A01	3184232	3187133	5	***	BnaA01g06090D protein	DNA binding; DNA-binding transcription factor activity; nucleus; mitochondrion; regulation of transcription, DNA-templated; cellular protein modification process; protein lipoylation; octanoyltransferase activity; transferase activity; transferase activity, transferring acyl groups; lipoyl(octanoyl) transferase activity; octanoyl transferase activity (acting on glycine-cleavage complex H protein)…	GO:0003677, GO:0003700, GO:0005634, GO:0005739, GO:0006355, GO:0006464, GO:0009249, GO:0016415, GO:0016740, GO:0016746, GO:0033819, GO:0102555
A01p07130.1_BnaDAR	A01	3187534	3189444	7	***	Chloroplast envelope membrane protein	ion transport; plastid inner membrane; membrane; integral component of membrane	GO:0006811, GO:0009528, GO:0016020, GO:0016021
A01p07140.1_BnaDAR	A01	3192243	3193605	5	***	alpha/beta hydrolase domain-containing protein 17B-like	hydrolase activity	GO:0016787
A01p07150.1_BnaDAR	A01	3193509	3195923	7	***	Calmodulin-binding protein	calmodulin binding	GO:0005516
A01p07160.1_BnaDAR	A01	3196820	3197931	3	***	BnaA01g06130D protein	membrane; integral component of membrane	GO:0016020, GO:0016021
A01p07170.1_BnaDAR	A01	3198349	3199001	4	*-*	Lysosomal Pro-X carboxypeptidase	carboxypeptidase activity; proteolysis; serine-type peptidase activity; hydrolase activity	GO:0004180, GO:0006508, GO:0008236, GO:0016787
A01p07180.1_BnaDAR	A01	3199021	3200212	5	***	Lysosomal Pro-X carboxypeptidase	carboxypeptidase activity; proteolysis; serine-type peptidase activity; hydrolase activity	GO:0004180, GO:0006508, GO:0008236, GO:0016787
A01p07190.1_BnaDAR	A01	3201971	3203888	9	***	Acid phosphatase	acid phosphatase activity; dephosphorylation; hydrolase activity	GO:0003993, GO:0016311, GO:0016787
A01p07200.1_BnaDAR	A01	3205505	3208024	5	***	Transcription factor bHLH69	DNA-binding transcription activator activity, RNA polymerase II-specific; DNA binding; DNA-binding transcription factor activity; nucleus; regulation of transcription, DNA-templated; positive regulation of transcription by RNA polymerase II; protein dimerization activity; pollen sperm cell differentiation; root hair cell differentiation; root hair elongation; microgametogenesis; root hair cell de…	GO:0001228, GO:0003677, GO:0003700, GO:0005634, GO:0006355, GO:0045944, GO:0046983, GO:0048235, GO:0048765, GO:0048767, GO:0055046, GO:0080147
A01p07210.1_BnaDAR	A01	3217854	3220304	9	*-*	BnaA09g12390D protein	membrane; integral component of membrane	GO:0016020, GO:0016021
A01p07220.1_BnaDAR	A01	3220305	3221223	2	--*	BnaA09g12390D protein	membrane; integral component of membrane	GO:0016020, GO:0016021
A01p07230.1_BnaDAR	A01	3234001	3235326	1	***	Non-specific serine/threonine protein kinase	nucleotide binding; protein kinase activity; protein serine/threonine kinase activity; ATP binding; protein phosphorylation; signal transduction; kinase activity; phosphorylation; transferase activity; NA; NA	GO:0000166, GO:0004672, GO:0004674, GO:0005524, GO:0006468, GO:0007165, GO:0016301, GO:0016310, GO:0016740, GO:0106310, GO:0106311
A01p07240.1_BnaDAR	A01	3246477	3248566	10	***	Fatty-acid desaturase	lipid metabolic process; membrane; integral component of membrane; oxidoreductase activity; oxidation-reduction process; 1-18:1-2-16:0-monogalactosyldiacylglycerol acyl-lipid omega-6 desaturase activity; 1-18:1-2-16:0-digalactosyldiacylglycerol desaturase activity	GO:0006629, GO:0016020, GO:0016021, GO:0016491, GO:0055114, GO:0102834, GO:0102873
A01p07250.1_BnaDAR	A01	3249413	3249793	1	--*	Related to MFS amino acid transporter	membrane; integral component of membrane; transmembrane transporter activity; transmembrane transport	GO:0016020, GO:0016021, GO:0022857, GO:0055085
A01p07260.1_BnaDAR	A01	3251201	3252906	5	*-*	50S ribosomal protein L21, related protein	RNA binding; structural constituent of ribosome; ribosome; translation; rRNA binding	GO:0003723, GO:0003735, GO:0005840, GO:0006412, GO:0019843
A01p07270.1_BnaDAR	A01	3253266	3256156	10	***	Leucine aminopeptidase, putative	aminopeptidase activity; cytoplasm; proteolysis; peptidase activity; hydrolase activity; protein metabolic process; manganese ion binding; metalloaminopeptidase activity	GO:0004177, GO:0005737, GO:0006508, GO:0008233, GO:0016787, GO:0019538, GO:0030145, GO:0070006
A01p07280.1_BnaDAR	A01	3256019	3258443	8	***	Endonuclease/exonuclease/phosphatase protein	endonuclease activity; exonuclease activity; nucleic acid phosphodiester bond hydrolysis	GO:0004519, GO:0004527, GO:0090305
A01p07290.1_BnaDAR	A01	3259727	3262164	8	***	Ubiquitin carboxyl-terminal hydrolase	thiol-dependent ubiquitin-specific protease activity; proteolysis; ubiquitin-dependent protein catabolic process; peptidase activity; cysteine-type peptidase activity; protein deubiquitination; hydrolase activity	GO:0004843, GO:0006508, GO:0006511, GO:0008233, GO:0008234, GO:0016579, GO:0016787
A01p07300.1_BnaDAR	A01	3262522	3262875	1	***	Bifunctional inhibitor/plant lipid transfer protein/seed storage helical domain containing protein	lipid binding	GO:0008289
A01p07310.1_BnaDAR	A01	3266918	3268903	4	***	Heptahelical transmembrane protein 2	response to hormone; response to sucrose; membrane; integral component of membrane; signaling receptor activity	GO:0009725, GO:0009744, GO:0016020, GO:0016021, GO:0038023
A01p07320.1_BnaDAR	A01	3269297	3270552	6	***	Nuclear pore complex protein NUP43	protein binding; nucleus; nuclear envelope; nuclear pore; protein transport; nuclear pore outer ring; mRNA transport	GO:0005515, GO:0005634, GO:0005635, GO:0005643, GO:0015031, GO:0031080, GO:0051028
A01p07330.1_BnaDAR	A01	3270553	3271230	4	*-*	Nuclear pore complex protein NUP43	protein binding; nucleus; nuclear envelope; nuclear pore; protein transport; nuclear pore outer ring; mRNA transport	GO:0005515, GO:0005634, GO:0005635, GO:0005643, GO:0015031, GO:0031080, GO:0051028
A01p07340.1_BnaDAR	A01	3271786	3272996	2	*-*	Myosin-binding protein	membrane; integral component of membrane	GO:0016020, GO:0016021
A01p07350.1_BnaDAR	A01	3273165	3275804	1	***	Pentatricopeptide repeat-containing protein	DNA binding; mRNA binding; chloroplast stroma	GO:0003677, GO:0003729, GO:0009570
A01p07360.1_BnaDAR	A01	3276464	3279913	10	***	Carboxypeptidase	carboxypeptidase activity; serine-type carboxypeptidase activity; extracellular region; vacuole; proteolysis; peptidase activity; hydrolase activity	GO:0004180, GO:0004185, GO:0005576, GO:0005773, GO:0006508, GO:0008233, GO:0016787
A01p07370.1_BnaDAR	A01	3280941	3283888	10	***	Carboxypeptidase	carboxypeptidase activity; serine-type carboxypeptidase activity; extracellular region; vacuole; proteolysis; peptidase activity; hydrolase activity	GO:0004180, GO:0004185, GO:0005576, GO:0005773, GO:0006508, GO:0008233, GO:0016787
A01p07380.1_BnaDAR	A01	3287922	3291865	4	***	Autophagy-related protein 11	autophagosome assembly; autophagy of mitochondrion; positive regulation of protein phosphorylation; protein binding; autophagosome; autophagy; plasmodesma; leaf senescence; protein transport; extrinsic component of membrane; protein kinase binding; autophagy of peroxisome; cytoplasmic vesicle; phagophore assembly site membrane; piecemeal microautophagy of the nucleus; protein homodimerization act…	GO:0000045, GO:0000422, GO:0001934, GO:0005515, GO:0005776, GO:0006914, GO:0009506, GO:0010150, GO:0015031, GO:0019898, GO:0019901, GO:0030242, GO:0031410, GO:0034045, GO:0034727, GO:0042803, GO:0060090, GO:0061709, GO:1990316
A01p07390.1_BnaDAR	A01	3291956	3294450	6	***	ATP-dependent DNA helicase	helicase activity; biological_process	GO:0004386, GO:0008150
A01p07400.1_BnaDAR	A01	3295723	3296184	1	--*	ATP binding cassette subfamily B member 9	nucleotide binding; ATP binding; lysosome; lysosomal membrane; ATPase-coupled peptide transmembrane transporter activity; peptide transport; membrane; integral component of membrane; ATPase activity; transmembrane transporter activity; integral component of endoplasmic reticulum membrane; ATPase-coupled transmembrane transporter activity; protein homodimerization activity; intracellular membrane-…	GO:0000166, GO:0005524, GO:0005764, GO:0005765, GO:0015440, GO:0015833, GO:0016020, GO:0016021, GO:0016887, GO:0022857, GO:0030176, GO:0042626, GO:0042803, GO:0043231, GO:0055085
A01p07410.1_BnaDAR	A01	3300809	3306003	7	***	Pentatricopeptide repeat-containing protein	mitochondrial RNA processing; mitochondrion; zinc ion binding; chloroplast; cytidine to uridine editing; mitochondrial mRNA modification	GO:0000963, GO:0005739, GO:0008270, GO:0009507, GO:0016554, GO:0080156
A01p07420.1_BnaDAR	A01	3309558	3310037	2	*-*	Eukaryotic translation initiation factor isoform 4G-1	RNA binding; mRNA binding; translation initiation factor activity; nucleus; cytoplasm; cytosol; translation; translational initiation; regulation of translation; plastid; eukaryotic translation initiation factor 4F complex	GO:0003723, GO:0003729, GO:0003743, GO:0005634, GO:0005737, GO:0005829, GO:0006412, GO:0006413, GO:0006417, GO:0009536, GO:0016281
A01p07430.1_BnaDAR	A01	3311496	3317714	3	*-*	Protein DETOXIFICATION	vacuolar membrane; antiporter activity; membrane; integral component of membrane; transmembrane transporter activity; xenobiotic transport; xenobiotic transmembrane transporter activity; transmembrane transport	GO:0005774, GO:0015297, GO:0016020, GO:0016021, GO:0022857, GO:0042908, GO:0042910, GO:0055085
A01p07440.1_BnaDAR	A01	3312841	3315648	6	*-*	Replication protein A 70 kDa DNA-binding subunit A	DNA binding	GO:0003677
A01p07450.1_BnaDAR	A01	3324515	3325549	2	*-*	Protein DETOXIFICATION	antiporter activity; membrane; integral component of membrane; xenobiotic transport; xenobiotic transmembrane transporter activity; transmembrane transport	GO:0015297, GO:0016020, GO:0016021, GO:0042908, GO:0042910, GO:0055085
A01p07460.1_BnaDAR	A01	3325580	3325953	3	*-*	Protein DETOXIFICATION	vacuolar membrane; antiporter activity; membrane; integral component of membrane; transmembrane transporter activity; xenobiotic transport; xenobiotic transmembrane transporter activity; transmembrane transport	GO:0005774, GO:0015297, GO:0016020, GO:0016021, GO:0022857, GO:0042908, GO:0042910, GO:0055085
A01p07470.1_BnaDAR	A01	3329484	3331490	7	*--	BnaC08g41820D protein	membrane; integral component of membrane	GO:0016020, GO:0016021
A01p07480.1_BnaDAR	A01	3332873	3333466	3	*-*	Vacuolar protein sorting-associated protein 53 A	GARP complex; endosome; Golgi apparatus; cytosol; endosome membrane; membrane; retrograde transport, endosome to Golgi	GO:0000938, GO:0005768, GO:0005794, GO:0005829, GO:0010008, GO:0016020, GO:0042147
A01p07490.1_BnaDAR	A01	3336502	3337200	1	***	RING/U-box superfamily protein	cytoplasm; protein ubiquitination; metal ion binding; ubiquitin protein ligase activity	GO:0005737, GO:0016567, GO:0046872, GO:0061630
A01p07500.1_BnaDAR	A01	3337826	3339965	2	*-*	ATP-dependent DNA helicase	helicase activity; biological_process	GO:0004386, GO:0008150
A01p07510.1_BnaDAR	A01	3340326	3346022	8	***	BnaA01g06430D protein	nucleotide binding; zinc ion transmembrane transporter activity; cadmium ion transmembrane transporter activity; membrane; integral component of membrane; cadmium ion transmembrane transport; zinc ion transmembrane transport	GO:0000166, GO:0005385, GO:0015086, GO:0016020, GO:0016021, GO:0070574, GO:0071577
A01p07520.1_BnaDAR	A01	3346361	3347984	7	***	Nucleolin 1	nucleic acid binding; RNA binding	GO:0003676, GO:0003723
A01p07530.1_BnaDAR	A01	3349831	3350129	2	*-*	QWRF motif-containing protein 2-like	cytoplasm; nuclear microtubule; microtubule binding; spindle assembly	GO:0005737, GO:0005880, GO:0008017, GO:0051225
A01p07540.1_BnaDAR	A01	3350569	3352700	8	***	Pentatricopeptide repeat-containing protein	mitochondrial RNA processing; mitochondrion; zinc ion binding; chloroplast; cytidine to uridine editing; mitochondrial mRNA modification	GO:0000963, GO:0005739, GO:0008270, GO:0009507, GO:0016554, GO:0080156
A01p07550.1_BnaDAR	A01	3353640	3357199	9	***	Eukaryotic translation initiation factor isoform 4G-2	RNA binding; mRNA binding; translation initiation factor activity; cytosol; translation; translational initiation; regulation of translation; eukaryotic translation initiation factor 4F complex	GO:0003723, GO:0003729, GO:0003743, GO:0005829, GO:0006412, GO:0006413, GO:0006417, GO:0016281
A01p07560.1_BnaDAR	A01	3357810	3358817	3	***	Target of trans acting-siR480/255 protein	molecular_function; biological_process	GO:0003674, GO:0008150
A01p07570.1_BnaDAR	A01	3359954	3360277	1	--*	Deoxyribodipyrimidine photolyase	lyase activity	GO:0016829
A01p07580.1_BnaDAR	A01	3361285	3364346	2	***	BnaA08g12960D protein	membrane; integral component of membrane	GO:0016020, GO:0016021
A01p07590.1_BnaDAR	A01	3364665	3365323	2	***	UPF0057 membrane protein	membrane; integral component of membrane	GO:0016020, GO:0016021
A01p07600.1_BnaDAR	A01	3370480	3371263	2	***	UPF0057 membrane protein	membrane; integral component of membrane	GO:0016020, GO:0016021
A01p07610.1_BnaDAR	A01	3371673	3372973	2	***	F-box family protein	SCF ubiquitin ligase complex; SCF-dependent proteasomal ubiquitin-dependent protein catabolic process	GO:0019005, GO:0031146
A01p07620.1_BnaDAR	A01	3381720	3382913	1	*-*	Pentatricopeptide repeat-containing protein	membrane; integral component of membrane	GO:0016020, GO:0016021
A01p07630.1_BnaDAR	A01	3383335	3384926	4	***	Ribosomal RNA small subunit methyltransferase G	methyltransferase activity; transferase activity; methylation	GO:0008168, GO:0016740, GO:0032259
A01p07640.1_BnaDAR	A01	3390699	3393322	7	***	Signal recognition particle receptor alpha subunit family protein	nucleotide binding; GTPase activity; signal recognition particle binding; GTP binding; endoplasmic reticulum; signal recognition particle receptor complex; SRP-dependent cotranslational protein targeting to membrane; intracellular protein transport	GO:0000166, GO:0003924, GO:0005047, GO:0005525, GO:0005783, GO:0005785, GO:0006614, GO:0006886
A01p07650.1_BnaDAR	A01	3394501	3395730	3	***	GMP synthase [glutamine-hydrolyzing]	cytoplasm; cytosol; glutamine metabolic process	GO:0005737, GO:0005829, GO:0006541
A01p07660.1_BnaDAR	A01	3400349	3401083	3	--*	Ribosome maturation factor RimM	cytoplasm; ribosome; rRNA processing; ribosome biogenesis; ribosomal small subunit biogenesis; ribosome binding	GO:0005737, GO:0005840, GO:0006364, GO:0042254, GO:0042274, GO:0043022
A01p07670.1_BnaDAR	A01	3402393	3405110	4	*-*	BnaA01g06550D protein	nucleotide binding; protein kinase activity; protein serine/threonine kinase activity; ATP binding; protein phosphorylation; kinase activity; phosphorylation; transferase activity	GO:0000166, GO:0004672, GO:0004674, GO:0005524, GO:0006468, GO:0016301, GO:0016310, GO:0016740
A01p07680.1_BnaDAR	A01	3409040	3410426	5	***	transmembrane protein 208 homolog	endoplasmic reticulum; endoplasmic reticulum membrane; membrane; integral component of membrane	GO:0005783, GO:0005789, GO:0016020, GO:0016021
A01p07690.1_BnaDAR	A01	3410625	3410826	2	--*	Lactation elevated protein 1	nucleotide binding; ATP binding	GO:0000166, GO:0005524
A01p07700.1_BnaDAR	A01	3415627	3416781	3	*-*	Tetratricopeptide repeat protein 1	plastid; thylakoid	GO:0009536, GO:0009579
A01p07710.1_BnaDAR	A01	3416770	3417390	1	-**	Glycine-rich protein	biological_process	GO:0008150
A01p07720.1_BnaDAR	A01	3424817	3425446	1	--*	Glycine-rich protein	biological_process	GO:0008150
A01p07730.1_BnaDAR	A01	3432570	3434044	1	***	UDP-glucuronate 4-epimerase	membrane; integral component of membrane	GO:0016020, GO:0016021
A01p07740.1_BnaDAR	A01	3436842	3438156	2	***	BnaA01g06620D protein	plasma membrane; plasmodesma; membrane; integral component of membrane	GO:0005886, GO:0009506, GO:0016020, GO:0016021
A01p07750.1_BnaDAR	A01	3438277	3439960	7	***	WAT1-related protein	plasma membrane; membrane; integral component of membrane; transmembrane transporter activity; transmembrane transport	GO:0005886, GO:0016020, GO:0016021, GO:0022857, GO:0055085
A01p07760.1_BnaDAR	A01	3444312	3444984	2	***	Transcription factor	nucleus; brassinosteroid mediated signaling pathway; regulation of growth; protein dimerization activity	GO:0005634, GO:0009742, GO:0040008, GO:0046983
A01p07770.1_BnaDAR	A01	3447062	3448480	1	***	RING-H2 finger protein ATL13	plasma membrane; membrane; integral component of membrane; protein ubiquitination; transferase activity; ubiquitin protein ligase binding; metal ion binding; response to karrikin	GO:0005886, GO:0016020, GO:0016021, GO:0016567, GO:0016740, GO:0031625, GO:0046872, GO:0080167
A01p07780.1_BnaDAR	A01	3452760	3453329	2	***	EG45-like domain containing protein	cell wall	GO:0005618
A01p07790.1_BnaDAR	A01	3454937	3455425	1	***	BnaA01g06660D protein	membrane; integral component of membrane	GO:0016020, GO:0016021
A01p07800.1_BnaDAR	A01	3456495	3460444	6	***	Cyclic nucleotide-gated channel	ion channel activity; voltage-gated potassium channel activity; ion transport; potassium ion transport; membrane; integral component of membrane; ion transmembrane transport; transmembrane transport; potassium ion transmembrane transport	GO:0005216, GO:0005249, GO:0006811, GO:0006813, GO:0016020, GO:0016021, GO:0034220, GO:0055085, GO:0071805
A01p07810.1_BnaDAR	A01	3463791	3466690	3	***	Protein SMAX1-LIKE 2	circadian rhythm; response to strigolactone	GO:0007623, GO:1902347
A01p07820.1_BnaDAR	A01	3473367	3476231	10	***	Diacylglycerol kinase	nucleotide binding; NAD+ kinase activity; diacylglycerol kinase activity; ATP binding; plasma membrane; defense response; signal transduction; protein kinase C-activating G protein-coupled receptor signaling pathway; kinase activity; phosphorylation; transferase activity	GO:0000166, GO:0003951, GO:0004143, GO:0005524, GO:0005886, GO:0006952, GO:0007165, GO:0007205, GO:0016301, GO:0016310, GO:0016740
A01p07830.1_BnaDAR	A01	3476766	3477419	1	***	Pathogenesis-related protein PR-1	extracellular region; defense response; response to biotic stimulus	GO:0005576, GO:0006952, GO:0009607
A01p07840.1_BnaDAR	A01	3481937	3483123	2	***	Kelch repeat-containing F-box family protein	ubiquitin-dependent protein catabolic process	GO:0006511
A01p07850.1_BnaDAR	A01	3484529	3485591	3	***	Xyloglucan endotransglucosylase/hydrolase	hydrolase activity, hydrolyzing O-glycosyl compounds; extracellular region; cell wall; carbohydrate metabolic process; cellular glucan metabolic process; metabolic process; xyloglucan metabolic process; transferase activity; xyloglucan:xyloglucosyl transferase activity; hydrolase activity; hydrolase activity, acting on glycosyl bonds; cell wall biogenesis; apoplast; cell wall organization	GO:0004553, GO:0005576, GO:0005618, GO:0005975, GO:0006073, GO:0008152, GO:0010411, GO:0016740, GO:0016762, GO:0016787, GO:0016798, GO:0042546, GO:0048046, GO:0071555
A01p07860.1_BnaDAR	A01	3486915	3488043	3	***	Xyloglucan endotransglucosylase/hydrolase	hydrolase activity, hydrolyzing O-glycosyl compounds; extracellular region; cell wall; carbohydrate metabolic process; cellular glucan metabolic process; metabolic process; xyloglucan metabolic process; transferase activity; xyloglucan:xyloglucosyl transferase activity; hydrolase activity; hydrolase activity, acting on glycosyl bonds; cell wall biogenesis; apoplast; cell wall organization	GO:0004553, GO:0005576, GO:0005618, GO:0005975, GO:0006073, GO:0008152, GO:0010411, GO:0016740, GO:0016762, GO:0016787, GO:0016798, GO:0042546, GO:0048046, GO:0071555
A01p07870.1_BnaDAR	A01	3493321	3494363	3	***	Xyloglucan endotransglucosylase/hydrolase	hydrolase activity, hydrolyzing O-glycosyl compounds; extracellular region; cell wall; carbohydrate metabolic process; cellular glucan metabolic process; metabolic process; xyloglucan metabolic process; transferase activity; xyloglucan:xyloglucosyl transferase activity; hydrolase activity; hydrolase activity, acting on glycosyl bonds; cell wall biogenesis; apoplast; cell wall organization	GO:0004553, GO:0005576, GO:0005618, GO:0005975, GO:0006073, GO:0008152, GO:0010411, GO:0016740, GO:0016762, GO:0016787, GO:0016798, GO:0042546, GO:0048046, GO:0071555
A01p07880.1_BnaDAR	A01	3494741	3496417	3	***	Protein YIPF	membrane; integral component of membrane	GO:0016020, GO:0016021
A01p07890.1_BnaDAR	A01	3499803	3501536	1	***	AAA-ATPase	ATP binding; ATPase activity	GO:0005524, GO:0016887
A01p07900.1_BnaDAR	A01	3503136	3504649	4	***	Syntaxin t-snare family protein	protein transport; membrane; integral component of membrane; vesicle-mediated transport; Golgi vesicle transport	GO:0015031, GO:0016020, GO:0016021, GO:0016192, GO:0048193
A01p07910.1_BnaDAR	A01	3506245	3507003	1	**-	Helicase	helicase activity	GO:0004386
A01p07920.1_BnaDAR	A01	3510179	3514206	17	***	NADPH--cytochrome P450 reductase	NADPH-hemoprotein reductase activity; cytoplasm; endoplasmic reticulum; endoplasmic reticulum membrane; cytosol; FMN binding; membrane; integral component of membrane; oxidoreductase activity; oxidoreductase activity, acting on paired donors, with incorporation or reduction of molecular oxygen, NAD(P)H as one donor, and incorporation of one atom of oxygen; flavin adenine dinucleotide binding; NAD…	GO:0003958, GO:0005737, GO:0005783, GO:0005789, GO:0005829, GO:0010181, GO:0016020, GO:0016021, GO:0016491, GO:0016709, GO:0050660, GO:0050661, GO:0055114
A01p07930.1_BnaDAR	A01	3528531	3531387	2	***	VIN3-like protein 2	DNA binding; protein binding; nucleus; chromatin silencing complex; response to cold; plasmodesma; flower development; vegetative to reproductive phase transition of meristem; PcG protein complex; circadian regulation of gene expression; methylated histone binding; identical protein binding; metal ion binding; regulation of short-day photoperiodism, flowering; positive regulation of histone H3-K9…	GO:0003677, GO:0005515, GO:0005634, GO:0005677, GO:0009409, GO:0009506, GO:0009908, GO:0010228, GO:0031519, GO:0032922, GO:0035064, GO:0042802, GO:0046872, GO:0048587, GO:1900111
A01p07940.1_BnaDAR	A01	3553658	3558210	10	***	Plasma membrane ATPase	nucleotide binding; ATP binding; plasma membrane; ion transport; proton-exporting ATPase activity, phosphorylative mechanism; membrane; integral component of membrane; ATPase activity; regulation of intracellular pH; proton export across plasma membrane; proton transmembrane transport	GO:0000166, GO:0005524, GO:0005886, GO:0006811, GO:0008553, GO:0016020, GO:0016021, GO:0016887, GO:0051453, GO:0120029, GO:1902600
A01p07950.1_BnaDAR	A01	3561489	3562993	3	--*	40S ribosomal protein S23	cytoplasmic translation; structural constituent of ribosome; cytoplasm; endoplasmic reticulum; rough endoplasmic reticulum; cytosol; ribosome; translation; small ribosomal subunit; cytosolic small ribosomal subunit; polysomal ribosome	GO:0002181, GO:0003735, GO:0005737, GO:0005783, GO:0005791, GO:0005829, GO:0005840, GO:0006412, GO:0015935, GO:0022627, GO:0042788
A01p07960.1_BnaDAR	A01	3563621	3564109	1	***	Transcription factor bHLH146	DNA binding; DNA-binding transcription factor activity; nucleus; regulation of transcription, DNA-templated	GO:0003677, GO:0003700, GO:0005634, GO:0006355
A01p07970.1_BnaDAR	A01	3569436	3571269	5	***	Peroxidase	peroxidase activity; extracellular region; response to oxidative stress; oxidoreductase activity; heme binding; hydrogen peroxide catabolic process; metal ion binding; oxidation-reduction process; cellular oxidant detoxification	GO:0004601, GO:0005576, GO:0006979, GO:0016491, GO:0020037, GO:0042744, GO:0046872, GO:0055114, GO:0098869
A01p07980.1_BnaDAR	A01	3575142	3575673	2	*-*	Histone H2A deubiquitinase (DUF3755)	nucleus	GO:0005634
A01p07990.1_BnaDAR	A01	3578200	3583358	20	***	Villin-4	mRNA binding; actin binding; cytoplasm; cytosol; cytoskeleton; plasma membrane; cytoskeleton organization; actin filament organization; response to abscisic acid; actin filament depolymerization; root hair elongation; actin filament severing; actin filament binding; actin filament capping; cytoplasmic streaming	GO:0003729, GO:0003779, GO:0005737, GO:0005829, GO:0005856, GO:0005886, GO:0007010, GO:0007015, GO:0009737, GO:0030042, GO:0048767, GO:0051014, GO:0051015, GO:0051693, GO:0099636
A01p08000.1_BnaDAR	A01	3593823	3600578	9	***	Urb2/Npa2 family protein	nucleolus; ribosome biogenesis	GO:0005730, GO:0042254
A01p08010.1_BnaDAR	A01	3601792	3604133	4	***	DNA ligase	ligase activity	GO:0016874
A01p08020.1_BnaDAR	A01	3606896	3610051	9	***	Cadmium/zinc-transporting ATPase HMA3	nucleotide binding; ATP binding; vacuole; vacuolar membrane; cation transport; membrane; integral component of membrane; zinc transmembrane transporter activity, phosphorylative mechanism; ATPase-coupled cation transmembrane transporter activity; metal ion transport; metal ion binding; zinc ion transmembrane transport; detoxification of cadmium ion; cation transmembrane transport	GO:0000166, GO:0005524, GO:0005773, GO:0005774, GO:0006812, GO:0016020, GO:0016021, GO:0016463, GO:0019829, GO:0030001, GO:0046872, GO:0071577, GO:0071585, GO:0098655
A01p08030.1_BnaDAR	A01	3617041	3622160	8	***	Cadmium/zinc-transporting ATPase HMA2	nucleotide binding; zinc ion transmembrane transporter activity; ATP binding; plasma membrane; cation transport; cadmium ion transmembrane transporter activity; membrane; integral component of membrane; zinc transmembrane transporter activity, phosphorylative mechanism; ATPase-coupled cation transmembrane transporter activity; metal ion transport; metal ion binding; zinc ion homeostasis; cadmium …	GO:0000166, GO:0005385, GO:0005524, GO:0005886, GO:0006812, GO:0015086, GO:0016020, GO:0016021, GO:0016463, GO:0019829, GO:0030001, GO:0046872, GO:0055069, GO:0070574, GO:0071577, GO:0098655
A01p08040.1_BnaDAR	A01	3635594	3638305	13	***	Myosin heavy chain-related	membrane; integral component of membrane	GO:0016020, GO:0016021
A01p08050.1_BnaDAR	A01	3639089	3639217	1	--*	BnaA09g12990D protein	ubiquitin-dependent protein catabolic process; protein ubiquitination; ubiquitin protein ligase activity	GO:0006511, GO:0016567, GO:0061630
A01p08060.1_BnaDAR	A01	3645865	3648383	3	***	Auxin response factor	DNA binding; nucleus; regulation of transcription, DNA-templated; response to hormone; auxin-activated signaling pathway	GO:0003677, GO:0005634, GO:0006355, GO:0009725, GO:0009734
A01p08070.1_BnaDAR	A01	3652450	3652860	2	***	Defensin-like protein 171	extracellular region; defense response; killing of cells of other organism; defense response to fungus	GO:0005576, GO:0006952, GO:0031640, GO:0050832
A01p08080.1_BnaDAR	A01	3655205	3656500	1	***	Aspartyl protease family protein	aspartic-type endopeptidase activity; proteolysis; peptidase activity; hydrolase activity	GO:0004190, GO:0006508, GO:0008233, GO:0016787
A01p08090.1_BnaDAR	A01	3656636	3660418	9	***	Subtilisin-like protease	serine-type endopeptidase activity; proteolysis; peptidase activity; serine-type peptidase activity; hydrolase activity	GO:0004252, GO:0006508, GO:0008233, GO:0008236, GO:0016787
A01p08100.1_BnaDAR	A01	3664425	3665916	1	***	Molybdate transporter like	molybdate ion transmembrane transporter activity; molybdate ion transport; membrane; integral component of membrane	GO:0015098, GO:0015689, GO:0016020, GO:0016021
A01p08110.1_BnaDAR	A01	3670275	3670622	1	***	AT4g30010/F6G3_40	helicase activity; mitochondrion; mitochondrial proton-transporting ATP synthase complex; plasma membrane; biological_process; plastid	GO:0004386, GO:0005739, GO:0005753, GO:0005886, GO:0008150, GO:0009536
A01p08120.1_BnaDAR	A01	3672261	3674121	2	***	Folic acid synthesis protein fol1	nucleotide binding; catalytic activity; 2-amino-4-hydroxy-6-hydroxymethyldihydropteridine diphosphokinase activity; dihydropteroate synthase activity; ATP binding; metabolic process; folic acid-containing compound biosynthetic process; kinase activity; phosphorylation; transferase activity; pteridine-containing compound metabolic process; cellular metabolic process; tetrahydrofolate biosynthetic …	GO:0000166, GO:0003824, GO:0003848, GO:0004156, GO:0005524, GO:0008152, GO:0009396, GO:0016301, GO:0016310, GO:0016740, GO:0042558, GO:0044237, GO:0046654, GO:0046656, GO:0046872
A01p08130.1_BnaDAR	A01	3675497	3679262	10	***	BnaA01g06980D protein	nucleotide binding; protein kinase activity; protein serine/threonine kinase activity; ATP binding; protein phosphorylation; membrane; integral component of membrane; kinase activity; phosphorylation; transferase activity	GO:0000166, GO:0004672, GO:0004674, GO:0005524, GO:0006468, GO:0016020, GO:0016021, GO:0016301, GO:0016310, GO:0016740
A01p08140.1_BnaDAR	A01	3680394	3681739	5	***	Transmembrane protein	protein binding; endoplasmic reticulum; plasma membrane; membrane; integral component of membrane; ERAD pathway	GO:0005515, GO:0005783, GO:0005886, GO:0016020, GO:0016021, GO:0036503
A01p08150.1_BnaDAR	A01	3683628	3686630	5	***	TBC1 domain family member-like protein	GTPase activator activity; intracellular protein transport; Rab GTPase binding; activation of GTPase activity	GO:0005096, GO:0006886, GO:0017137, GO:0090630
A01p08160.1_BnaDAR	A01	3699466	3703007	10	***	Pathogenesis-related homeodomain protein	DNA binding; nucleus; metal ion binding	GO:0003677, GO:0005634, GO:0046872
A01p08170.1_BnaDAR	A01	3703399	3707135	5	***	Basic helix-loop-helix transcription factor	nucleus; protein dimerization activity	GO:0005634, GO:0046983
A01p08180.1_BnaDAR	A01	3708231	3708659	1	*-*	BnaC05g43600D protein	nucleic acid binding; zinc ion binding	GO:0003676, GO:0008270
A01p08190.1_BnaDAR	A01	3708791	3709111	1	***	BnaA01g07040D protein	nucleic acid binding; zinc ion binding	GO:0003676, GO:0008270
A01p08200.1_BnaDAR	A01	3717738	3734125	23	***	Protein SMAX1-LIKE 4	nucleus; response to salt stress; phloem transport; hydrolase activity; carbohydrate homeostasis; cellular response to water deprivation	GO:0005634, GO:0009651, GO:0010233, GO:0016787, GO:0033500, GO:0042631
A01p08210.1_BnaDAR	A01	3742014	3743573	6	*-*	BnaC03g58510D protein	nucleotide binding; aminoacyl-tRNA ligase activity; tyrosine-tRNA ligase activity; ATP binding; translation; tRNA aminoacylation for protein translation; ligase activity	GO:0000166, GO:0004812, GO:0004831, GO:0005524, GO:0006412, GO:0006418, GO:0016874
A01p08220.1_BnaDAR	A01	3747175	3749020	3	*-*	BnaC03g58510D protein	nucleotide binding; aminoacyl-tRNA ligase activity; tyrosine-tRNA ligase activity; ATP binding; translation; tRNA aminoacylation for protein translation; ligase activity	GO:0000166, GO:0004812, GO:0004831, GO:0005524, GO:0006412, GO:0006418, GO:0016874
A01p08230.1_BnaDAR	A01	3749228	3753237	8	*-*	Target of trans acting-siR480/255 protein	molecular_function; biological_process	GO:0003674, GO:0008150
A01p08240.1_BnaDAR	A01	3753283	3753612	1	*-*	BnaC03g58510D protein	nucleotide binding; aminoacyl-tRNA ligase activity; tyrosine-tRNA ligase activity; ATP binding; translation; tRNA aminoacylation for protein translation; ligase activity	GO:0000166, GO:0004812, GO:0004831, GO:0005524, GO:0006412, GO:0006418, GO:0016874
A01p08250.1_BnaDAR	A01	3754413	3754653	2	--*	Bacterial regulatory proteins, tetR family	DNA binding	GO:0003677
A01p08260.1_BnaDAR	A01	3754918	3760280	6	*-*	BnaC03g58510D protein	nucleotide binding; aminoacyl-tRNA ligase activity; tyrosine-tRNA ligase activity; ATP binding; translation; tRNA aminoacylation for protein translation; ligase activity	GO:0000166, GO:0004812, GO:0004831, GO:0005524, GO:0006412, GO:0006418, GO:0016874
A01p08270.1_BnaDAR	A01	3761296	3761901	1	***	Methionyl-tRNA synthetase	aminoacyl-tRNA ligase activity	GO:0004812
A01p08280.1_BnaDAR	A01	3766780	3774814	34	***	Calcium-transporting ATPase	nucleotide binding; calcium transmembrane transporter activity, phosphorylative mechanism; calmodulin binding; ATP binding; ion transport; calcium ion transport; membrane; integral component of membrane; calcium ion transmembrane transport	GO:0000166, GO:0005388, GO:0005516, GO:0005524, GO:0006811, GO:0006816, GO:0016020, GO:0016021, GO:0070588
A01p08290.1_BnaDAR	A01	3775528	3776313	1	***	Oligosaccharyltransferase complex subunit ostc	protein glycosylation; oligosaccharyltransferase complex; membrane; integral component of membrane; transferase activity	GO:0006486, GO:0008250, GO:0016020, GO:0016021, GO:0016740
A01p08300.1_BnaDAR	A01	3776579	3779141	13	***	Guanine nucleotide-binding protein beta subunit-like protein 1	nucleus; cytoplasm; regulation of DNA repair; cellular response to DNA damage stimulus; pollen development; plasmodesma organization; embryo development ending in seed dormancy; response to aluminum ion; plasmodesmata-mediated intercellular transport; DNA integrity checkpoint; plant ovule development; acquisition of desiccation tolerance in seed; positive regulation of cell cycle arrest; response…	GO:0005634, GO:0005737, GO:0006282, GO:0006974, GO:0009555, GO:0009663, GO:0009793, GO:0010044, GO:0010497, GO:0031570, GO:0048481, GO:0048700, GO:0071158, GO:0072718, GO:2000280
A01p08310.1_BnaDAR	A01	3779477	3780494	2	***	transmembrane protein 230-like	membrane; integral component of membrane	GO:0016020, GO:0016021
A01p08320.1_BnaDAR	A01	3781146	3782875	1	***	Threonine synthase, putative	threonine synthase activity; cytoplasm; cellular amino acid metabolic process; cellular amino acid biosynthetic process; threonine biosynthetic process; lyase activity; pyridoxal phosphate binding	GO:0004795, GO:0005737, GO:0006520, GO:0008652, GO:0009088, GO:0016829, GO:0030170
A01p08330.1_BnaDAR	A01	3782942	3784089	2	***	WD repeat-containing protein VIP3	protein binding; nucleus; cytoplasm; cytosol; plasma membrane; flower development; negative regulation of flower development; histone H3-K36 methylation; posttranscriptional gene silencing; Cdc73/Paf1 complex; histone H3-K4 methylation; Cul4-RING E3 ubiquitin ligase complex; positive regulation of wax biosynthetic process	GO:0005515, GO:0005634, GO:0005737, GO:0005829, GO:0005886, GO:0009908, GO:0009910, GO:0010452, GO:0016441, GO:0016593, GO:0051568, GO:0080008, GO:1904278
A01p08340.1_BnaDAR	A01	3784343	3785949	6	***	Cleavage and polyadenylation specificity factor subunit 5	RNA binding; mRNA binding; nucleus; mRNA cleavage factor complex; mRNA polyadenylation; mRNA processing; hydrolase activity	GO:0003723, GO:0003729, GO:0005634, GO:0005849, GO:0006378, GO:0006397, GO:0016787
A01p08350.1_BnaDAR	A01	3791869	3794105	7	***	Mitogen-associated protein kinase kinase 1	nucleotide binding; protein kinase activity; protein serine/threonine kinase activity; ATP binding; protein phosphorylation; kinase activity; phosphorylation; transferase activity	GO:0000166, GO:0004672, GO:0004674, GO:0005524, GO:0006468, GO:0016301, GO:0016310, GO:0016740
A01p08360.1_BnaDAR	A01	3794703	3796379	2	***	Patatin	lipid metabolic process; lipid catabolic process; hydrolase activity	GO:0006629, GO:0016042, GO:0016787
A01p08370.1_BnaDAR	A01	3798132	3804141	13	***	Serine/arginine repetitive matrix protein	nucleus	GO:0005634
A01p08380.1_BnaDAR	A01	3806275	3808155	1	***	Nuclease	molecular_function; cellular_component; metal ion binding; cellular response to hypoxia	GO:0003674, GO:0005575, GO:0046872, GO:0071456
A01p08390.1_BnaDAR	A01	3812235	3818832	5	***	Cysteine/Histidine-rich C1 domain family protein	metal ion binding	GO:0046872
A01p08400.1_BnaDAR	A01	3818862	3821979	15	***	WD-40 repeat-containing protein MSI4	protein binding; nucleus; nucleolus; cytoplasm; mitochondrion; cytosol; DNA repair; chromatin organization; multicellular organism development; flower development; response to UV-B; cell differentiation; metal ion binding; Cul4-RING E3 ubiquitin ligase complex	GO:0005515, GO:0005634, GO:0005730, GO:0005737, GO:0005739, GO:0005829, GO:0006281, GO:0006325, GO:0007275, GO:0009908, GO:0010224, GO:0030154, GO:0046872, GO:0080008
A01p08410.1_BnaDAR	A01	3828361	3830129	1	***	BnaA01g07220D protein	oxidoreductase activity; polyamine oxidase activity; oxidation-reduction process	GO:0016491, GO:0046592, GO:0055114
A01p08420.1_BnaDAR	A01	3841199	3842372	3	--*	Protein phosphatase 2c, putative	phosphoprotein phosphatase activity; protein serine/threonine phosphatase activity; magnesium-dependent protein serine/threonine phosphatase activity; protein dephosphorylation; hydrolase activity; phosphatase activity; cation binding; metal ion binding; protein serine phosphatase activity; protein threonine phosphatase activity	GO:0004721, GO:0004722, GO:0004724, GO:0006470, GO:0016787, GO:0016791, GO:0043169, GO:0046872, GO:0106306, GO:0106307
A01p08430.1_BnaDAR	A01	3843195	3843506	1	---	ATP-dependent DNA helicase	nucleotide binding; telomere maintenance; DNA helicase activity; helicase activity; ATP binding; DNA repair; DNA recombination; cellular response to DNA damage stimulus; hydrolase activity; DNA duplex unwinding	GO:0000166, GO:0000723, GO:0003678, GO:0004386, GO:0005524, GO:0006281, GO:0006310, GO:0006974, GO:0016787, GO:0032508
A01p08440.1_BnaDAR	A01	3846642	3848223	1	***	Ectonucleotide pyrophosphatase/phosphodiesterase, putative	catalytic activity; phosphodiesterase I activity; vacuole; membrane; integral component of membrane; hydrolase activity; nucleic acid phosphodiester bond hydrolysis	GO:0003824, GO:0004528, GO:0005773, GO:0016020, GO:0016021, GO:0016787, GO:0090305
A01p08450.1_BnaDAR	A01	3848902	3850281	1	***	Ectonucleotide pyrophosphatase/phosphodiesterase family	catalytic activity; membrane; integral component of membrane	GO:0003824, GO:0016020, GO:0016021
A01p08460.1_BnaDAR	A01	3852119	3855979	6	***	ectonucleotide pyrophosphatase/phosphodiesterase family member 1-like	catalytic activity; vacuole; membrane; integral component of membrane	GO:0003824, GO:0005773, GO:0016020, GO:0016021
A01p08470.1_BnaDAR	A01	3856230	3857081	2	***	Embryo defective 2752	membrane; integral component of membrane	GO:0016020, GO:0016021
A01p08480.1_BnaDAR	A01	3857322	3857903	1	***	PRA1 family protein	endoplasmic reticulum; Golgi apparatus; membrane; integral component of membrane; vesicle-mediated transport	GO:0005783, GO:0005794, GO:0016020, GO:0016021, GO:0016192
A01p08490.1_BnaDAR	A01	3860968	3862356	5	***	UPF0725 protein At2g20620	molecular_function	GO:0003674
A01p08500.1_BnaDAR	A01	3866301	3867490	5	--*	Acyl-[acyl-carrier-protein]--UDP-N-acetylglucosamine O-acyltransferase	lipid biosynthetic process; acyl-[acyl-carrier-protein]-UDP-N-acetylglucosamine O-acyltransferase activity; membrane; integral component of membrane; transferase activity; transferase activity, transferring acyl groups	GO:0008610, GO:0008780, GO:0016020, GO:0016021, GO:0016740, GO:0016746
A01p08510.1_BnaDAR	A01	3868063	3869338	4	***	Inorganic pyrophosphatase	dephosphorylation; phosphatase activity; metal ion binding	GO:0016311, GO:0016791, GO:0046872
A01p08520.1_BnaDAR	A01	3869605	3871456	8	***	AT4G29520-like protein	endoplasmic reticulum; plasma membrane; response to heat; protein folding chaperone; chaperone-mediated protein folding	GO:0005783, GO:0005886, GO:0009408, GO:0044183, GO:0061077
A01p08530.1_BnaDAR	A01	3871410	3873488	8	***	Protein arginine N-methyltransferase 1.1	protein binding; nucleus; cytoplasm; cytosol; chromatin organization; methyltransferase activity; protein-arginine N-methyltransferase activity; transferase activity; peptidyl-arginine methylation; peptidyl-arginine methylation, to asymmetrical-dimethyl arginine; methylation; protein-arginine omega-N asymmetric methyltransferase activity; peptidyl-arginine N-methylation	GO:0005515, GO:0005634, GO:0005737, GO:0005829, GO:0006325, GO:0008168, GO:0016274, GO:0016740, GO:0018216, GO:0019919, GO:0032259, GO:0035242, GO:0035246
A01p08540.1_BnaDAR	A01	3873833	3877284	16	***	Xaa-Pro dipeptidase	proteolysis; hydrolase activity; manganese ion binding; metal ion binding; metalloaminopeptidase activity	GO:0006508, GO:0016787, GO:0030145, GO:0046872, GO:0070006
A01p08550.1_BnaDAR	A01	3877983	3878591	2	***	Mitochondrial ATP synthase g subunit family protein	mitochondrial proton-transporting ATP synthase complex, coupling factor F(o)""; mitochondrion; ion transport; proton transmembrane transporter activity; ATP synthesis coupled proton transport; membrane; proton-transporting ATP synthase complex, coupling factor F(o)""	GO:0000276, GO:0005739, GO:0006811, GO:0015078, GO:0015986, GO:0016020, GO:0045263
A01p08560.1_BnaDAR	A01	3879351	3880089	3	***	BnaA01g07380D protein	metal ion transport; metal ion binding	GO:0030001, GO:0046872
A01p08570.1_BnaDAR	A01	3880516	3881460	5	***	Phospholipase A2-gamma	phospholipase A2 activity; calcium ion binding; phospholipid binding; extracellular region; endoplasmic reticulum; Golgi apparatus; lipid metabolic process; phospholipid metabolic process; pollen development; pollen germination; pollen tube growth; lipid catabolic process; hydrolase activity; metal ion binding; calcium-dependent phospholipase A2 activity; arachidonic acid secretion; phospholipase…	GO:0004623, GO:0005509, GO:0005543, GO:0005576, GO:0005783, GO:0005794, GO:0006629, GO:0006644, GO:0009555, GO:0009846, GO:0009860, GO:0016042, GO:0016787, GO:0046872, GO:0047498, GO:0050482, GO:0102567, GO:0102568
A01p08580.1_BnaDAR	A01	3882367	3889666	14	***	BnaA01g07400D protein	nucleotide binding; protein kinase activity; protein serine/threonine kinase activity; ATP binding; protein phosphorylation; membrane; integral component of membrane; kinase activity; phosphorylation; transferase activity	GO:0000166, GO:0004672, GO:0004674, GO:0005524, GO:0006468, GO:0016020, GO:0016021, GO:0016301, GO:0016310, GO:0016740
A01p08590.1_BnaDAR	A01	3890636	3895358	7	***	Regulator of Vps4 activity in the MVB pathway protein	molecular_function; protein localization; protein transport	GO:0003674, GO:0008104, GO:0015031
A01p08600.1_BnaDAR	A01	3895472	3896588	3	***	30S ribosomal protein S8, putative	structural constituent of ribosome; ribosome; translation; cytosolic small ribosomal subunit	GO:0003735, GO:0005840, GO:0006412, GO:0022627
A01p08610.1_BnaDAR	A01	3896787	3898610	2	***	F-box/LRR-repeat protein At4g29420	biological_process	GO:0008150
A01p08620.1_BnaDAR	A01	3898662	3900639	5	***	60S ribosomal protein L28	mRNA binding; structural constituent of ribosome; ribosome; plasma membrane; translation; plasmodesma; cytosolic large ribosomal subunit	GO:0003729, GO:0003735, GO:0005840, GO:0005886, GO:0006412, GO:0009506, GO:0022625
A01p08630.1_BnaDAR	A01	3901111	3902596	7	***	Oxidoreductase/transition metal ion-binding protein (DUF3531)	biological_process	GO:0008150
A01p08640.1_BnaDAR	A01	3903072	3903769	2	***	40S ribosomal protein S30	mRNA binding; structural constituent of ribosome; nucleolus; mitochondrion; ribosome; plasma membrane; translation; plastid; cytosolic small ribosomal subunit	GO:0003729, GO:0003735, GO:0005730, GO:0005739, GO:0005840, GO:0005886, GO:0006412, GO:0009536, GO:0022627
A01p08650.1_BnaDAR	A01	3904095	3910291	11	***	Kinase family protein	nucleotide binding; protein kinase activity; protein serine/threonine kinase activity; ATP binding; cytoplasm; endosome; protein phosphorylation; pollen development; pollen germination; endosome membrane; membrane; kinase activity; phosphorylation; phosphatidylinositol-mediated signaling; NA; NA	GO:0000166, GO:0004672, GO:0004674, GO:0005524, GO:0005737, GO:0005768, GO:0006468, GO:0009555, GO:0009846, GO:0010008, GO:0016020, GO:0016301, GO:0016310, GO:0048015, GO:0106310, GO:0106311
A01p08660.1_BnaDAR	A01	3913176	3918663	7	***	BnaA01g07490D protein	protein kinase activity; ATP binding; protein phosphorylation	GO:0004672, GO:0005524, GO:0006468
A01p08670.1_BnaDAR	A01	3918869	3921665	3	***	BnaA01g07490D protein	protein kinase activity; ATP binding; protein phosphorylation	GO:0004672, GO:0005524, GO:0006468
A01p08680.1_BnaDAR	A01	3924147	3929555	2	***	F-box/kelch-repeat protein At5g39560	chloroplast	GO:0009507
A01p08690.1_BnaDAR	A01	3931074	3933189	4	***	Glucan endo-1,3-beta-glucosidase, putative	hydrolase activity, hydrolyzing O-glycosyl compounds; carbohydrate metabolic process; metabolic process; hydrolase activity; hydrolase activity, acting on glycosyl bonds; glucan endo-1,3-beta-D-glucosidase activity; anchored component of plasma membrane	GO:0004553, GO:0005975, GO:0008152, GO:0016787, GO:0016798, GO:0042973, GO:0046658
A01p08700.1_BnaDAR	A01	3933527	3934218	3	***	Profilin	actin binding; actin monomer binding; cytoplasm; cytoskeleton; cell cortex; sequestering of actin monomers	GO:0003779, GO:0003785, GO:0005737, GO:0005856, GO:0005938, GO:0042989
A01p08710.1_BnaDAR	A01	3938555	3939535	3	***	Profilin	actin binding; cytoplasm; cytoskeleton	GO:0003779, GO:0005737, GO:0005856
A01p08720.1_BnaDAR	A01	3940312	3942546	7	***	Derlin	endoplasmic reticulum; endoplasmic reticulum membrane; membrane; integral component of membrane	GO:0005783, GO:0005789, GO:0016020, GO:0016021
A01p08730.1_BnaDAR	A01	3949593	3951304	2	***	DUF1005 family protein (DUF1005)	molecular_function; biological_process	GO:0003674, GO:0008150
A01p08740.1_BnaDAR	A01	3957633	3957984	2	***	Low-molecular-weight cysteine-rich 22	killing of cells of other organism; defense response to fungus	GO:0031640, GO:0050832
A01p08750.1_BnaDAR	A01	3966255	3967920	2	*-*	DUF1005 family protein (DUF1005)	molecular_function; biological_process	GO:0003674, GO:0008150
A01p08760.1_BnaDAR	A01	3973484	3973833	2	***	Low-molecular-weight cysteine-rich 23	killing of cells of other organism; defense response to fungus	GO:0031640, GO:0050832
A01p08770.1_BnaDAR	A01	3976693	3978190	3	***	Acid phosphatase 1	acid phosphatase activity; membrane; integral component of membrane; dephosphorylation; nutrient reservoir activity	GO:0003993, GO:0016020, GO:0016021, GO:0016311, GO:0045735
A01p08780.1_BnaDAR	A01	3978521	3984416	7	***	NAC domain-containing protein 75	transcription regulatory region sequence-specific DNA binding; DNA binding; DNA-binding transcription factor activity; nucleus; regulation of transcription, DNA-templated; multicellular organism development; positive regulation of transcription, DNA-templated; cell wall organization; tracheary element differentiation	GO:0000976, GO:0003677, GO:0003700, GO:0005634, GO:0006355, GO:0007275, GO:0045893, GO:0071555, GO:1905177
A01p08790.1_BnaDAR	A01	3993187	3993799	2	--*	Receptor-like protein kinase-related family protein	0
A01p08800.1_BnaDAR	A01	3995261	3997924	11	***	ATP-dependent 6-phosphofructokinase	nucleotide binding; catalytic activity; 6-phosphofructokinase activity; ATP binding; cytoplasm; fructose 6-phosphate metabolic process; glycolytic process; metabolic process; kinase activity; phosphorylation; transferase activity; metal ion binding; glycolytic process through fructose-6-phosphate	GO:0000166, GO:0003824, GO:0003872, GO:0005524, GO:0005737, GO:0006002, GO:0006096, GO:0008152, GO:0016301, GO:0016310, GO:0016740, GO:0046872, GO:0061615
A01p08810.1_BnaDAR	A01	3997757	4000845	5	***	Gamma-glutamyltranspeptidase	proteolysis; glutathione catabolic process; membrane; integral component of membrane; glutathione hydrolase activity	GO:0006508, GO:0006751, GO:0016020, GO:0016021, GO:0036374
A01p08820.1_BnaDAR	A01	4009939	4011197	1	***	Zinc finger CCCH domain protein	DNA binding; metal ion binding	GO:0003677, GO:0046872
A01p08830.1_BnaDAR	A01	4015607	4016244	4	--*	mitogen-activated protein kinase kinase kinase 13	0
A01p08840.1_BnaDAR	A01	4020330	4022158	7	***	B3 domain-containing protein	DNA binding; nucleus	GO:0003677, GO:0005634
A01p08850.1_BnaDAR	A01	4026189	4029065	7	***	Vacuolar protein sorting-associated protein 32	endosome; vacuolar transport	GO:0005768, GO:0007034
A01p08860.1_BnaDAR	A01	4036107	4037896	1	***	Protein DETOXIFICATION	antiporter activity; membrane; integral component of membrane; transmembrane transporter activity; xenobiotic transport; xenobiotic transmembrane transporter activity; transmembrane transport	GO:0015297, GO:0016020, GO:0016021, GO:0022857, GO:0042908, GO:0042910, GO:0055085
A01p08870.1_BnaDAR	A01	4044507	4045026	2	*-*	RNA-directed DNA polymerase, eukaryota, Reverse transcriptase zinc-binding domain protein	RNA-directed DNA polymerase activity; RNA-dependent DNA biosynthetic process	GO:0003964, GO:0006278
A01p08880.1_BnaDAR	A01	4059744	4060125	3	--*	Potassium-transporting ATPase potassium-binding subunit	plasma membrane; ion transport; potassium ion transport; potassium transmembrane transporter activity, phosphorylative mechanism; membrane; integral component of membrane; potassium ion transmembrane transport	GO:0005886, GO:0006811, GO:0006813, GO:0008556, GO:0016020, GO:0016021, GO:0071805
A01p08890.1_BnaDAR	A01	4066906	4071041	8	***	Transcription factor bHLH68	DNA-binding transcription activator activity, RNA polymerase II-specific; DNA binding; DNA-binding transcription factor activity; protein binding; nucleus; regulation of transcription, DNA-templated; positive regulation of transcription by RNA polymerase II; protein dimerization activity	GO:0001228, GO:0003677, GO:0003700, GO:0005515, GO:0005634, GO:0006355, GO:0045944, GO:0046983
A01p08900.1_BnaDAR	A01	4075814	4076354	1	--*	ATP synthase gamma chain	ATP binding; plasma membrane; ATP biosynthetic process; ion transport; ATP synthesis coupled proton transport; membrane; plasma membrane ATP synthesis coupled proton transport; proton-transporting ATP synthase complex, catalytic core F(1)""; proton-transporting ATP synthase activity, rotational mechanism	GO:0005524, GO:0005886, GO:0006754, GO:0006811, GO:0015986, GO:0016020, GO:0042777, GO:0045261, GO:0046933
A01p08910.1_BnaDAR	A01	4097431	4099515	3	*-*	Mitogen-activated protein kinase	MAPK cascade; protein kinase activity; protein serine/threonine kinase activity; MAP kinase activity; ATP binding; protein phosphorylation; kinase activity; phosphorylation; transferase activity	GO:0000165, GO:0004672, GO:0004674, GO:0004707, GO:0005524, GO:0006468, GO:0016301, GO:0016310, GO:0016740
A01p08920.1_BnaDAR	A01	4111636	4113260	5	***	Auxin-responsive protein	nucleus; regulation of transcription, DNA-templated; auxin-activated signaling pathway	GO:0005634, GO:0006355, GO:0009734
A01p08930.1_BnaDAR	A01	4113399	4121717	16	***	Elongation factor Ts, mitochondrial	nucleotide binding; nucleic acid binding; DNA binding; translation elongation factor activity; phospholipase A2 activity; aminoacyl-tRNA ligase activity; aspartate-tRNA ligase activity; ATP binding; cytoplasm; mitochondrion; translation; translational elongation; tRNA aminoacylation for protein translation; aspartyl-tRNA aminoacylation; phospholipid metabolic process; arachidonic acid secretion	GO:0000166, GO:0003676, GO:0003677, GO:0003746, GO:0004623, GO:0004812, GO:0004815, GO:0005524, GO:0005737, GO:0005739, GO:0006412, GO:0006414, GO:0006418, GO:0006422, GO:0006644, GO:0050482
A01p08940.1_BnaDAR	A01	4125996	4128157	6	***	Receptor lectin kinase	nucleotide binding; defense response to oomycetes; protein kinase activity; protein serine/threonine kinase activity; transmembrane receptor protein serine/threonine kinase activity; ATP binding; plasma membrane; protein phosphorylation; defense response; transmembrane receptor protein serine/threonine kinase signaling pathway; membrane; integral component of membrane; kinase activity; phosphoryl…	GO:0000166, GO:0002229, GO:0004672, GO:0004674, GO:0004675, GO:0005524, GO:0005886, GO:0006468, GO:0006952, GO:0007178, GO:0016020, GO:0016021, GO:0016301, GO:0016310, GO:0016740, GO:0030246, GO:0042742, GO:0106310, GO:0106311
A01p08950.1_BnaDAR	A01	4128200	4130633	6	***	26S proteasome regulatory subunit 4 homolog	nucleotide binding; proteasome complex; ATP binding; nucleus; cytoplasm; proteasome regulatory particle, base subcomplex; hydrolase activity; ATPase activity; TBP-class protein binding; protein catabolic process; proteasome-activating ATPase activity; positive regulation of proteasomal protein catabolic process	GO:0000166, GO:0000502, GO:0005524, GO:0005634, GO:0005737, GO:0008540, GO:0016787, GO:0016887, GO:0017025, GO:0030163, GO:0036402, GO:1901800
A01p08960.1_BnaDAR	A01	4131961	4139796	7	*-*	Plant self-incompatibility protein S1 family protein	extracellular region; rejection of self pollen	GO:0005576, GO:0060320
A01p08970.1_BnaDAR	A01	4141491	4141925	1	*-*	glycine-rich protein	0
A01p08980.1_BnaDAR	A01	4145003	4149535	18	***	Fatty acid beta-oxidation multifunctional protein	catalytic activity; 3-hydroxyacyl-CoA dehydrogenase activity; dodecenoyl-CoA delta-isomerase activity; enoyl-CoA hydratase activity; peroxisome; lipid metabolic process; fatty acid metabolic process; fatty acid beta-oxidation; 3-hydroxybutyryl-CoA epimerase activity; oxidoreductase activity; lyase activity; oxidation-reduction process	GO:0003824, GO:0003857, GO:0004165, GO:0004300, GO:0005777, GO:0006629, GO:0006631, GO:0006635, GO:0008692, GO:0016491, GO:0016829, GO:0055114
A01p08990.1_BnaDAR	A01	4149609	4157590	13	*-*	BnaA01g07920D protein	RNA polymerase II transcription regulatory region sequence-specific DNA binding; nucleus; regulation of transcription, DNA-templated; multicellular organism development	GO:0000977, GO:0005634, GO:0006355, GO:0007275
A01p09000.1_BnaDAR	A01	4158187	4159879	7	***	Rac-like GTP-binding protein	GTPase activity; GTP binding; small GTPase mediated signal transduction	GO:0003924, GO:0005525, GO:0007264
[truncated: 107,290 more rows]

## Sheet: S3
Supplementary Table S3 L. maculans isolate characterization performing cotyledon tests with the parental lines and a B. napus differential set
Parental lines of the multiparental mapping population
	L. maculans isolate
Parental line	1.4.1.15
Lorenz	susceptible
Adriana	susceptible
Alpaga	susceptible
DK Cabernet	susceptible
Galileo	susceptible
JN	susceptible
King 10	susceptible
Brassica napus differential set
			L. maculans isolate
Genotype	Major genes		1.4.1.15
[truncated: 8 more rows]

## Sheet: S4
Supplementary Table S4 Significant marker-trait associations for quantitative blackleg resistance in the multiparental mapping population under controlled greenhouse conditions
[truncated: 524 more rows]

[truncated: 7 more sheets: S5, S6, S7, S8, S9, S10, S11]
